# Supplementary material
Source: Research Square preprint supplement (doi:10.21203/rs.3.rs-9851307/v1)
Supplement: Supplementary file 1 [file 0c27030f618d3771a467918a.xlsx]

## Sheet: Index
Simplified Supplementary Materials Index
Index
Supplementary item	File / content	Format	Included sheet
Supplementary Data S1	Cohort and data-freeze manifests; sample and modality manifest	Excel workbook sheet	S1_Cohort_Freeze
Supplementary Data S2	Pathway set details and pathway-level feature construction QC	Excel workbook sheet	S2_Pathway_QC
Supplementary Data S3	Nested CV fold definitions, scaling plan, modeling specifications	Excel workbook sheet	S3_NestedCV_Modeling
Supplementary Data S4	Internal and external model performance outputs	Excel workbook sheet	S4_Model_Performance
Supplementary Data S5	External deployment diagnostics and distribution-shift outputs	Excel workbook sheet	S5_External_Diagnostics
Supplementary Data S6	Alternative RNA pathway scoring sensitivity outputs	Excel workbook sheet	S6_RNA_Sensitivity
Supplementary Checklist	Manual submission placeholders and package manifest	Excel workbook sheet	Checklist_Manifest

## Sheet: S1_Cohort_Freeze
Supplementary Data S1. Cohort and data-freeze manifests
cohort_manifest_frozen_v1.tsv
cohort_id	cohort_name	cohort_layer	source_database	source_accession	disease	platform	modality_available	sample_unit	n_samples_final	n_events_death	n_events_censored	used_for_training	used_for_internal_cv	used_for_external_eval	used_for_calibration	used_for_orthogonal_support	primary_endpoint	freeze_status	freeze_version	analysis_role_note
TCGA_ESCA_ESCC_FC_B02v1	TCGA-ESCA ESCC fusion core with matched RNA, CNV, primary tumor methylation and valid OS	fusion_core	GDC/TCGA	TCGA-ESCA	ESCC	RNA-seq;CNV;DNA methylation;clinical	RNA;CNV;METH;CLIN	patient	92	31	61	TRUE	TRUE	FALSE	FALSE	FALSE	overall_survival	frozen	B02_v1	Main fusion core for pathway-anchored multi-omics method development. Not an external validation cohort.
GEO_GSE53625_DEP_B02v1	GSE53625 transcriptome-only deployment cohort	deployment	GEO	GSE53625	ESCC	Agilent microarray	RNA;CLIN	sample	179	106	73	FALSE	FALSE	TRUE	TRUE	FALSE	overall_survival	frozen	B02_v1	Primary transcriptome-only deployment resource. No feature selection or optimal cutpoint search allowed in this cohort.
GEO_GSE160269_SC_SUPPORT_B02v1	GSE160269 ESCC single-cell orthogonal support	orthogonal_support	GEO/GSA	GSE160269	ESCC	10x single-cell RNA-seq	scRNA	cell/sample	not_used_for_main_model	NA	NA	FALSE	FALSE	FALSE	FALSE	TRUE	none	role_frozen_data_pending	B02_v1	Orthogonal biological support only. Not used for model training or performance validation.
sample_manifest_frozen_v1.tsv
global_sample_id	cohort_id	source_patient_id	source_sample_id	sample_type	histology	platform	rna_sample_barcode	cnv_sample_barcode	methylation_sample_barcode	methylation_column	survival_time_days	survival_event	survival_source	age_at_diagnosis_years	gender	stage	include_fusion_core	include_deployment	include_orthogonal	qc_status
TCGA_ESCA_ESCC_FC_B02v1__TCGA-IG-A3I8	TCGA_ESCA_ESCC_FC_B02v1	TCGA-IG-A3I8	TCGA-IG-A3I8-01	Primary Tumor	ESCC	multi-omics	TCGA-IG-A3I8-01	TCGA-IG-A3I8-01	TCGA-IG-A3I8-01A	31471eb9-dd10-4b31-ae7f-2cdfff50147b.methylation	1012.0	0	local_clinical_tsv	51.433	female		TRUE	FALSE	FALSE	pass
TCGA_ESCA_ESCC_FC_B02v1__TCGA-IG-A3QL	TCGA_ESCA_ESCC_FC_B02v1	TCGA-IG-A3QL	TCGA-IG-A3QL-01	Primary Tumor	ESCC	multi-omics	TCGA-IG-A3QL-01	TCGA-IG-A3QL-01	TCGA-IG-A3QL-01A	1ee2f5be-2614-4c53-9e09-1795efed3600.methylation	1071.0	0	local_clinical_tsv	54.086	male		TRUE	FALSE	FALSE	pass
TCGA_ESCA_ESCC_FC_B02v1__TCGA-IG-A3Y9	TCGA_ESCA_ESCC_FC_B02v1	TCGA-IG-A3Y9	TCGA-IG-A3Y9-01	Primary Tumor	ESCC	multi-omics	TCGA-IG-A3Y9-01	TCGA-IG-A3Y9-01	TCGA-IG-A3Y9-01A	c3216a8e-0f3c-4d5a-a7f4-b34d544e40fe.methylation	26.0	1	local_clinical_tsv	72.088	male		TRUE	FALSE	FALSE	pass
TCGA_ESCA_ESCC_FC_B02v1__TCGA-IG-A3YA	TCGA_ESCA_ESCC_FC_B02v1	TCGA-IG-A3YA	TCGA-IG-A3YA-01	Primary Tumor	ESCC	multi-omics	TCGA-IG-A3YA-01	TCGA-IG-A3YA-01	TCGA-IG-A3YA-01A	24bebbfe-073e-4908-bce1-a7cc5f61739a.methylation	632.0	0	local_clinical_tsv	53.572	male		TRUE	FALSE	FALSE	pass
TCGA_ESCA_ESCC_FC_B02v1__TCGA-IG-A3YB	TCGA_ESCA_ESCC_FC_B02v1	TCGA-IG-A3YB	TCGA-IG-A3YB-01	Primary Tumor	ESCC	multi-omics	TCGA-IG-A3YB-01	TCGA-IG-A3YB-01	TCGA-IG-A3YB-01A	8776bb6b-83ee-457a-8428-6324727dfc21.methylation	80.0	0	local_clinical_tsv	61.098	male		TRUE	FALSE	FALSE	pass
TCGA_ESCA_ESCC_FC_B02v1__TCGA-IG-A4P3	TCGA_ESCA_ESCC_FC_B02v1	TCGA-IG-A4P3	TCGA-IG-A4P3-01	Primary Tumor	ESCC	multi-omics	TCGA-IG-A4P3-01	TCGA-IG-A4P3-01	TCGA-IG-A4P3-01A	f01b00b0-067b-4708-b4da-9faf0318af56.methylation	567.0	1	local_clinical_tsv	48.898	male		TRUE	FALSE	FALSE	pass
TCGA_ESCA_ESCC_FC_B02v1__TCGA-IG-A50L	TCGA_ESCA_ESCC_FC_B02v1	TCGA-IG-A50L	TCGA-IG-A50L-01	Primary Tumor	ESCC	multi-omics	TCGA-IG-A50L-01	TCGA-IG-A50L-01	TCGA-IG-A50L-01A	a1a3bcc7-313a-45c0-b6f2-b25a4e761feb.methylation	16.0	0	local_clinical_tsv	58.081	male		TRUE	FALSE	FALSE	pass
TCGA_ESCA_ESCC_FC_B02v1__TCGA-IG-A51D	TCGA_ESCA_ESCC_FC_B02v1	TCGA-IG-A51D	TCGA-IG-A51D-01	Primary Tumor	ESCC	multi-omics	TCGA-IG-A51D-01	TCGA-IG-A51D-01	TCGA-IG-A51D-01A	0ad8fedb-5c33-4505-b924-c06ea6a893c1.methylation	518.0	0	local_clinical_tsv	63.68	male		TRUE	FALSE	FALSE	pass
TCGA_ESCA_ESCC_FC_B02v1__TCGA-IG-A5B8	TCGA_ESCA_ESCC_FC_B02v1	TCGA-IG-A5B8	TCGA-IG-A5B8-01	Primary Tumor	ESCC	multi-omics	TCGA-IG-A5B8-01	TCGA-IG-A5B8-01	TCGA-IG-A5B8-01A	80c9cc6e-1d07-4433-aa0a-0188c63c8b37.methylation	24.0	1	local_clinical_tsv	72.756	male		TRUE	FALSE	FALSE	pass
TCGA_ESCA_ESCC_FC_B02v1__TCGA-IG-A5S3	TCGA_ESCA_ESCC_FC_B02v1	TCGA-IG-A5S3	TCGA-IG-A5S3-01	Primary Tumor	ESCC	multi-omics	TCGA-IG-A5S3-01	TCGA-IG-A5S3-01	TCGA-IG-A5S3-01A	30b7b208-2995-4584-b64f-90a27bd61212.methylation	712.0	0	local_clinical_tsv	69.58	female		TRUE	FALSE	FALSE	pass
TCGA_ESCA_ESCC_FC_B02v1__TCGA-IG-A625	TCGA_ESCA_ESCC_FC_B02v1	TCGA-IG-A625	TCGA-IG-A625-01	Primary Tumor	ESCC	multi-omics	TCGA-IG-A625-01	TCGA-IG-A625-01	TCGA-IG-A625-01A	03f1c1cf-cbd0-4aac-aedc-20a4ac1244b2.methylation	390.0	1	local_clinical_tsv	60.424	male		TRUE	FALSE	FALSE	pass
TCGA_ESCA_ESCC_FC_B02v1__TCGA-IG-A6QS	TCGA_ESCA_ESCC_FC_B02v1	TCGA-IG-A6QS	TCGA-IG-A6QS-01	Primary Tumor	ESCC	multi-omics	TCGA-IG-A6QS-01	TCGA-IG-A6QS-01	TCGA-IG-A6QS-01A	ead5cbc2-bddc-4b84-8627-3f3fcf41d352.methylation	303.0	1	local_clinical_tsv	54.483	male		TRUE	FALSE	FALSE	pass
TCGA_ESCA_ESCC_FC_B02v1__TCGA-IG-A8O2	TCGA_ESCA_ESCC_FC_B02v1	TCGA-IG-A8O2	TCGA-IG-A8O2-01	Primary Tumor	ESCC	multi-omics	TCGA-IG-A8O2-01	TCGA-IG-A8O2-01	TCGA-IG-A8O2-01A	557ee022-dc63-47b4-a461-3d57e7e05dd6.methylation	142.0	1	local_clinical_tsv	62.612	male		TRUE	FALSE	FALSE	pass
TCGA_ESCA_ESCC_FC_B02v1__TCGA-IG-A97H	TCGA_ESCA_ESCC_FC_B02v1	TCGA-IG-A97H	TCGA-IG-A97H-01	Primary Tumor	ESCC	multi-omics	TCGA-IG-A97H-01	TCGA-IG-A97H-01	TCGA-IG-A97H-01A	3ba84e66-a431-4bd0-b9c1-a3fdf11696f5.methylation	441.0	0	local_clinical_tsv	36.047	male		TRUE	FALSE	FALSE	pass
TCGA_ESCA_ESCC_FC_B02v1__TCGA-IG-A97I	TCGA_ESCA_ESCC_FC_B02v1	TCGA-IG-A97I	TCGA-IG-A97I-01	Primary Tumor	ESCC	multi-omics	TCGA-IG-A97I-01	TCGA-IG-A97I-01	TCGA-IG-A97I-01A	247e187e-6396-4485-b469-b900b6fdb354.methylation	370.0	0	local_clinical_tsv	58.237	male		TRUE	FALSE	FALSE	pass
TCGA_ESCA_ESCC_FC_B02v1__TCGA-JY-A6FD	TCGA_ESCA_ESCC_FC_B02v1	TCGA-JY-A6FD	TCGA-JY-A6FD-01	Primary Tumor	ESCC	multi-omics	TCGA-JY-A6FD-01	TCGA-JY-A6FD-01	TCGA-JY-A6FD-01A	497a570a-b622-4b90-9906-725dc1120402.methylation	2069.0	0	local_clinical_tsv	51.493	female		TRUE	FALSE	FALSE	pass
TCGA_ESCA_ESCC_FC_B02v1__TCGA-JY-A6FE	TCGA_ESCA_ESCC_FC_B02v1	TCGA-JY-A6FE	TCGA-JY-A6FE-01	Primary Tumor	ESCC	multi-omics	TCGA-JY-A6FE-01	TCGA-JY-A6FE-01	TCGA-JY-A6FE-01A	76d8ff28-3fbe-46d0-b1f8-246268b38b43.methylation	112.0	1	local_clinical_tsv	49.719	male		TRUE	FALSE	FALSE	pass
TCGA_ESCA_ESCC_FC_B02v1__TCGA-JY-A6FG	TCGA_ESCA_ESCC_FC_B02v1	TCGA-JY-A6FG	TCGA-JY-A6FG-01	Primary Tumor	ESCC	multi-omics	TCGA-JY-A6FG-01	TCGA-JY-A6FG-01	TCGA-JY-A6FG-01A	ee0c60d6-83b6-4513-9969-68ed65258b60.methylation	1263.0	1	local_clinical_tsv	50.234	male		TRUE	FALSE	FALSE	pass
TCGA_ESCA_ESCC_FC_B02v1__TCGA-JY-A93F	TCGA_ESCA_ESCC_FC_B02v1	TCGA-JY-A93F	TCGA-JY-A93F-01	Primary Tumor	ESCC	multi-omics	TCGA-JY-A93F-01	TCGA-JY-A93F-01	TCGA-JY-A93F-01A	84c00047-4da5-46f8-9835-a4dcc05d6be6.methylation	731.0	0	local_clinical_tsv	58.198	female		TRUE	FALSE	FALSE	pass
TCGA_ESCA_ESCC_FC_B02v1__TCGA-KH-A6WC	TCGA_ESCA_ESCC_FC_B02v1	TCGA-KH-A6WC	TCGA-KH-A6WC-01	Primary Tumor	ESCC	multi-omics	TCGA-KH-A6WC-01	TCGA-KH-A6WC-01	TCGA-KH-A6WC-01A	ef873356-5416-476b-8501-6f2cd27de751.methylation	191.0	0	local_clinical_tsv	82.593	male		TRUE	FALSE	FALSE	pass
TCGA_ESCA_ESCC_FC_B02v1__TCGA-L5-A43H	TCGA_ESCA_ESCC_FC_B02v1	TCGA-L5-A43H	TCGA-L5-A43H-01	Primary Tumor	ESCC	multi-omics	TCGA-L5-A43H-01	TCGA-L5-A43H-01	TCGA-L5-A43H-01A	b6fe8497-c67b-4d59-a82a-0da228a34fc1.methylation	9.0	1	local_clinical_tsv	75.543	male		TRUE	FALSE	FALSE	pass
TCGA_ESCA_ESCC_FC_B02v1__TCGA-L5-A4OM	TCGA_ESCA_ESCC_FC_B02v1	TCGA-L5-A4OM	TCGA-L5-A4OM-01	Primary Tumor	ESCC	multi-omics	TCGA-L5-A4OM-01	TCGA-L5-A4OM-01	TCGA-L5-A4OM-01A	b92c93ce-0bfa-40dc-9859-4bfec6528d9c.methylation	1458.0	1	local_clinical_tsv	54.333	female		TRUE	FALSE	FALSE	pass
TCGA_ESCA_ESCC_FC_B02v1__TCGA-L5-A88S	TCGA_ESCA_ESCC_FC_B02v1	TCGA-L5-A88S	TCGA-L5-A88S-01	Primary Tumor	ESCC	multi-omics	TCGA-L5-A88S-01	TCGA-L5-A88S-01	TCGA-L5-A88S-01A	2d2e2bb3-71dd-4584-bd0e-36e2d6d41d3d.methylation	471.0	0	local_clinical_tsv	84.747	male		TRUE	FALSE	FALSE	pass
TCGA_ESCA_ESCC_FC_B02v1__TCGA-L5-A88W	TCGA_ESCA_ESCC_FC_B02v1	TCGA-L5-A88W	TCGA-L5-A88W-01	Primary Tumor	ESCC	multi-omics	TCGA-L5-A88W-01	TCGA-L5-A88W-01	TCGA-L5-A88W-01A	19a3dc7a-7234-4202-8d43-6b87299a2319.methylation	764.0	1	local_clinical_tsv	68.531	male		TRUE	FALSE	FALSE	pass
TCGA_ESCA_ESCC_FC_B02v1__TCGA-L5-A88Z	TCGA_ESCA_ESCC_FC_B02v1	TCGA-L5-A88Z	TCGA-L5-A88Z-01	Primary Tumor	ESCC	multi-omics	TCGA-L5-A88Z-01	TCGA-L5-A88Z-01	TCGA-L5-A88Z-01A	6b21851f-21c7-4c66-a16f-bbf3efb747bb.methylation	225.0	0	local_clinical_tsv	70.883	female		TRUE	FALSE	FALSE	pass
TCGA_ESCA_ESCC_FC_B02v1__TCGA-L5-A8NK	TCGA_ESCA_ESCC_FC_B02v1	TCGA-L5-A8NK	TCGA-L5-A8NK-01	Primary Tumor	ESCC	multi-omics	TCGA-L5-A8NK-01	TCGA-L5-A8NK-01	TCGA-L5-A8NK-01A	fb6b476b-d7ee-4da9-a902-e9f6a95276ae.methylation	412.0	0	local_clinical_tsv	84.994	female		TRUE	FALSE	FALSE	pass
TCGA_ESCA_ESCC_FC_B02v1__TCGA-L5-A8NQ	TCGA_ESCA_ESCC_FC_B02v1	TCGA-L5-A8NQ	TCGA-L5-A8NQ-01	Primary Tumor	ESCC	multi-omics	TCGA-L5-A8NQ-01	TCGA-L5-A8NQ-01	TCGA-L5-A8NQ-01A	2d9d2a70-03f6-4e7e-8656-ad3bc999944b.methylation	650.0	1	local_clinical_tsv	71.869	male		TRUE	FALSE	FALSE	pass
TCGA_ESCA_ESCC_FC_B02v1__TCGA-L7-A56G	TCGA_ESCA_ESCC_FC_B02v1	TCGA-L7-A56G	TCGA-L7-A56G-01	Primary Tumor	ESCC	multi-omics	TCGA-L7-A56G-01	TCGA-L7-A56G-01	TCGA-L7-A56G-01A	d2f335d4-76b8-45c6-b127-43473cdc3ffe.methylation	330.0	1	local_clinical_tsv	66.738	male		TRUE	FALSE	FALSE	pass
TCGA_ESCA_ESCC_FC_B02v1__TCGA-LN-A49K	TCGA_ESCA_ESCC_FC_B02v1	TCGA-LN-A49K	TCGA-LN-A49K-01	Primary Tumor	ESCC	multi-omics	TCGA-LN-A49K-01	TCGA-LN-A49K-01	TCGA-LN-A49K-01A	9e398192-8d23-4732-88c6-9f85987ab9e1.methylation	180.0	1	local_clinical_tsv	66.746	male		TRUE	FALSE	FALSE	pass
TCGA_ESCA_ESCC_FC_B02v1__TCGA-LN-A49L	TCGA_ESCA_ESCC_FC_B02v1	TCGA-LN-A49L	TCGA-LN-A49L-01	Primary Tumor	ESCC	multi-omics	TCGA-LN-A49L-01	TCGA-LN-A49L-01	TCGA-LN-A49L-01A	60443549-c46f-4a63-a275-eb557cd20edc.methylation	318.0	1	local_clinical_tsv	44.255	male		TRUE	FALSE	FALSE	pass
TCGA_ESCA_ESCC_FC_B02v1__TCGA-LN-A49M	TCGA_ESCA_ESCC_FC_B02v1	TCGA-LN-A49M	TCGA-LN-A49M-01	Primary Tumor	ESCC	multi-omics	TCGA-LN-A49M-01	TCGA-LN-A49M-01	TCGA-LN-A49M-01A	be621575-c7db-44e1-a860-e8387f2c4936.methylation	385.0	0	local_clinical_tsv	62.787	male		TRUE	FALSE	FALSE	pass
TCGA_ESCA_ESCC_FC_B02v1__TCGA-LN-A49N	TCGA_ESCA_ESCC_FC_B02v1	TCGA-LN-A49N	TCGA-LN-A49N-01	Primary Tumor	ESCC	multi-omics	TCGA-LN-A49N-01	TCGA-LN-A49N-01	TCGA-LN-A49N-01A	19587af8-d32f-493e-8374-775663a52b63.methylation	378.0	0	local_clinical_tsv	50.658	male		TRUE	FALSE	FALSE	pass
TCGA_ESCA_ESCC_FC_B02v1__TCGA-LN-A49O	TCGA_ESCA_ESCC_FC_B02v1	TCGA-LN-A49O	TCGA-LN-A49O-01	Primary Tumor	ESCC	multi-omics	TCGA-LN-A49O-01	TCGA-LN-A49O-01	TCGA-LN-A49O-01A	9539b086-aa14-4668-a28d-e28c747cd01d.methylation	408.0	0	local_clinical_tsv	47.192	male		TRUE	FALSE	FALSE	pass
TCGA_ESCA_ESCC_FC_B02v1__TCGA-LN-A49P	TCGA_ESCA_ESCC_FC_B02v1	TCGA-LN-A49P	TCGA-LN-A49P-01	Primary Tumor	ESCC	multi-omics	TCGA-LN-A49P-01	TCGA-LN-A49P-01	TCGA-LN-A49P-01A	e36ad15e-2aa3-4fec-9b58-fd5471d679e0.methylation	375.0	0	local_clinical_tsv	72.578	male		TRUE	FALSE	FALSE	pass
TCGA_ESCA_ESCC_FC_B02v1__TCGA-LN-A49R	TCGA_ESCA_ESCC_FC_B02v1	TCGA-LN-A49R	TCGA-LN-A49R-01	Primary Tumor	ESCC	multi-omics	TCGA-LN-A49R-01	TCGA-LN-A49R-01	TCGA-LN-A49R-01A	88914b98-5cbd-4ab4-98b8-5b1d8f7b1aee.methylation	407.0	0	local_clinical_tsv	46.842	male		TRUE	FALSE	FALSE	pass
TCGA_ESCA_ESCC_FC_B02v1__TCGA-LN-A49S	TCGA_ESCA_ESCC_FC_B02v1	TCGA-LN-A49S	TCGA-LN-A49S-01	Primary Tumor	ESCC	multi-omics	TCGA-LN-A49S-01	TCGA-LN-A49S-01	TCGA-LN-A49S-01A	77a76bf6-043c-4eca-a4fa-1a56b9217f5a.methylation	400.0	0	local_clinical_tsv	59.997	male		TRUE	FALSE	FALSE	pass
TCGA_ESCA_ESCC_FC_B02v1__TCGA-LN-A49U	TCGA_ESCA_ESCC_FC_B02v1	TCGA-LN-A49U	TCGA-LN-A49U-01	Primary Tumor	ESCC	multi-omics	TCGA-LN-A49U-01	TCGA-LN-A49U-01	TCGA-LN-A49U-01A	6d86eba3-8a25-466f-ac92-1e582b439b37.methylation	467.0	0	local_clinical_tsv	62.886	male		TRUE	FALSE	FALSE	pass
TCGA_ESCA_ESCC_FC_B02v1__TCGA-LN-A49W	TCGA_ESCA_ESCC_FC_B02v1	TCGA-LN-A49W	TCGA-LN-A49W-01	Primary Tumor	ESCC	multi-omics	TCGA-LN-A49W-01	TCGA-LN-A49W-01	TCGA-LN-A49W-01A	999e3bbb-62dd-47aa-9d11-51d48f127ae5.methylation	403.0	0	local_clinical_tsv	73.676	male		TRUE	FALSE	FALSE	pass
TCGA_ESCA_ESCC_FC_B02v1__TCGA-LN-A49X	TCGA_ESCA_ESCC_FC_B02v1	TCGA-LN-A49X	TCGA-LN-A49X-01	Primary Tumor	ESCC	multi-omics	TCGA-LN-A49X-01	TCGA-LN-A49X-01	TCGA-LN-A49X-01A	54cdd033-5ccf-4a3a-8f03-0d0e85b7bb46.methylation	384.0	0	local_clinical_tsv	44.227	male		TRUE	FALSE	FALSE	pass
TCGA_ESCA_ESCC_FC_B02v1__TCGA-LN-A49Y	TCGA_ESCA_ESCC_FC_B02v1	TCGA-LN-A49Y	TCGA-LN-A49Y-01	Primary Tumor	ESCC	multi-omics	TCGA-LN-A49Y-01	TCGA-LN-A49Y-01	TCGA-LN-A49Y-01A	7ff5051c-8fa9-4f3f-b4b2-aef45c143a2d.methylation	379.0	0	local_clinical_tsv	77.248	male		TRUE	FALSE	FALSE	pass
TCGA_ESCA_ESCC_FC_B02v1__TCGA-LN-A4A1	TCGA_ESCA_ESCC_FC_B02v1	TCGA-LN-A4A1	TCGA-LN-A4A1-01	Primary Tumor	ESCC	multi-omics	TCGA-LN-A4A1-01	TCGA-LN-A4A1-01	TCGA-LN-A4A1-01A	5a9fff94-1a1b-49aa-a8b2-5a7ea5ae2c07.methylation	383.0	0	local_clinical_tsv	60.668	male		TRUE	FALSE	FALSE	pass
TCGA_ESCA_ESCC_FC_B02v1__TCGA-LN-A4A2	TCGA_ESCA_ESCC_FC_B02v1	TCGA-LN-A4A2	TCGA-LN-A4A2-01	Primary Tumor	ESCC	multi-omics	TCGA-LN-A4A2-01	TCGA-LN-A4A2-01	TCGA-LN-A4A2-01A	b8bc323e-9d72-4083-a150-b40e1e67c8ce.methylation	380.0	0	local_clinical_tsv	57.829	male		TRUE	FALSE	FALSE	pass
TCGA_ESCA_ESCC_FC_B02v1__TCGA-LN-A4A3	TCGA_ESCA_ESCC_FC_B02v1	TCGA-LN-A4A3	TCGA-LN-A4A3-01	Primary Tumor	ESCC	multi-omics	TCGA-LN-A4A3-01	TCGA-LN-A4A3-01	TCGA-LN-A4A3-01A	fd080cdd-dfaa-4617-866b-9761ce809c8a.methylation	388.0	0	local_clinical_tsv	61.09	male		TRUE	FALSE	FALSE	pass
TCGA_ESCA_ESCC_FC_B02v1__TCGA-LN-A4A4	TCGA_ESCA_ESCC_FC_B02v1	TCGA-LN-A4A4	TCGA-LN-A4A4-01	Primary Tumor	ESCC	multi-omics	TCGA-LN-A4A4-01	TCGA-LN-A4A4-01	TCGA-LN-A4A4-01A	da228f08-63c2-4308-8f4a-08cb9d4094bc.methylation	383.0	0	local_clinical_tsv	36.739	male		TRUE	FALSE	FALSE	pass
TCGA_ESCA_ESCC_FC_B02v1__TCGA-LN-A4A5	TCGA_ESCA_ESCC_FC_B02v1	TCGA-LN-A4A5	TCGA-LN-A4A5-01	Primary Tumor	ESCC	multi-omics	TCGA-LN-A4A5-01	TCGA-LN-A4A5-01	TCGA-LN-A4A5-01A	a0190037-6bc3-4bff-affa-371f9ab5f54b.methylation	681.0	1	local_clinical_tsv	49.719	male		TRUE	FALSE	FALSE	pass
TCGA_ESCA_ESCC_FC_B02v1__TCGA-LN-A4A6	TCGA_ESCA_ESCC_FC_B02v1	TCGA-LN-A4A6	TCGA-LN-A4A6-01	Primary Tumor	ESCC	multi-omics	TCGA-LN-A4A6-01	TCGA-LN-A4A6-01	TCGA-LN-A4A6-01A	dfe8ac5b-5af3-47a3-94f6-336d64957cc2.methylation	391.0	0	local_clinical_tsv	66.171	male		TRUE	FALSE	FALSE	pass
TCGA_ESCA_ESCC_FC_B02v1__TCGA-LN-A4A8	TCGA_ESCA_ESCC_FC_B02v1	TCGA-LN-A4A8	TCGA-LN-A4A8-01	Primary Tumor	ESCC	multi-omics	TCGA-LN-A4A8-01	TCGA-LN-A4A8-01	TCGA-LN-A4A8-01A	1063071b-5628-4280-8a03-ea2a2e5b0f2d.methylation	472.0	0	local_clinical_tsv	52.83	male		TRUE	FALSE	FALSE	pass
TCGA_ESCA_ESCC_FC_B02v1__TCGA-LN-A4A9	TCGA_ESCA_ESCC_FC_B02v1	TCGA-LN-A4A9	TCGA-LN-A4A9-01	Primary Tumor	ESCC	multi-omics	TCGA-LN-A4A9-01	TCGA-LN-A4A9-01	TCGA-LN-A4A9-01A	9df3b0eb-8727-4b32-8331-81972d577449.methylation	351.0	1	local_clinical_tsv	58.089	male		TRUE	FALSE	FALSE	pass
TCGA_ESCA_ESCC_FC_B02v1__TCGA-LN-A4MQ	TCGA_ESCA_ESCC_FC_B02v1	TCGA-LN-A4MQ	TCGA-LN-A4MQ-01	Primary Tumor	ESCC	multi-omics	TCGA-LN-A4MQ-01	TCGA-LN-A4MQ-01	TCGA-LN-A4MQ-01A	f8a68100-d1ec-4c61-9d94-8905a2c84589.methylation	375.0	0	local_clinical_tsv	46.516	male		TRUE	FALSE	FALSE	pass
TCGA_ESCA_ESCC_FC_B02v1__TCGA-LN-A4MR	TCGA_ESCA_ESCC_FC_B02v1	TCGA-LN-A4MR	TCGA-LN-A4MR-01	Primary Tumor	ESCC	multi-omics	TCGA-LN-A4MR-01	TCGA-LN-A4MR-01	TCGA-LN-A4MR-01A	ae3f1026-20ef-49ba-82ab-b89ba3a5610a.methylation	402.0	0	local_clinical_tsv	57.884	male		TRUE	FALSE	FALSE	pass
TCGA_ESCA_ESCC_FC_B02v1__TCGA-LN-A5U5	TCGA_ESCA_ESCC_FC_B02v1	TCGA-LN-A5U5	TCGA-LN-A5U5-01	Primary Tumor	ESCC	multi-omics	TCGA-LN-A5U5-01	TCGA-LN-A5U5-01	TCGA-LN-A5U5-01A	15649376-2f18-49b1-a9c0-67ce1bb8ee01.methylation	136.0	1	local_clinical_tsv	57.476	male		TRUE	FALSE	FALSE	pass
TCGA_ESCA_ESCC_FC_B02v1__TCGA-LN-A5U6	TCGA_ESCA_ESCC_FC_B02v1	TCGA-LN-A5U6	TCGA-LN-A5U6-01	Primary Tumor	ESCC	multi-omics	TCGA-LN-A5U6-01	TCGA-LN-A5U6-01	TCGA-LN-A5U6-01A	25f6bba7-c299-46de-ac53-c3cb30e8026d.methylation	375.0	0	local_clinical_tsv	54.319	male		TRUE	FALSE	FALSE	pass
TCGA_ESCA_ESCC_FC_B02v1__TCGA-LN-A5U7	TCGA_ESCA_ESCC_FC_B02v1	TCGA-LN-A5U7	TCGA-LN-A5U7-01	Primary Tumor	ESCC	multi-omics	TCGA-LN-A5U7-01	TCGA-LN-A5U7-01	TCGA-LN-A5U7-01A	451e5bd5-0efc-48cc-90ad-9e49a81fb511.methylation	768.0	0	local_clinical_tsv	46.346	male		TRUE	FALSE	FALSE	pass
TCGA_ESCA_ESCC_FC_B02v1__TCGA-LN-A7HV	TCGA_ESCA_ESCC_FC_B02v1	TCGA-LN-A7HV	TCGA-LN-A7HV-01	Primary Tumor	ESCC	multi-omics	TCGA-LN-A7HV-01	TCGA-LN-A7HV-01	TCGA-LN-A7HV-01A	9698ef5b-bfca-4135-8e1c-0e1ce5281d53.methylation	320.0	0	local_clinical_tsv	58.76	male		TRUE	FALSE	FALSE	pass
TCGA_ESCA_ESCC_FC_B02v1__TCGA-LN-A7HW	TCGA_ESCA_ESCC_FC_B02v1	TCGA-LN-A7HW	TCGA-LN-A7HW-01	Primary Tumor	ESCC	multi-omics	TCGA-LN-A7HW-01	TCGA-LN-A7HW-01	TCGA-LN-A7HW-01A	eda4514c-7e56-4c01-a537-397f8ab0b2b2.methylation	365.0	0	local_clinical_tsv	60.06	male		TRUE	FALSE	FALSE	pass
TCGA_ESCA_ESCC_FC_B02v1__TCGA-LN-A7HX	TCGA_ESCA_ESCC_FC_B02v1	TCGA-LN-A7HX	TCGA-LN-A7HX-01	Primary Tumor	ESCC	multi-omics	TCGA-LN-A7HX-01	TCGA-LN-A7HX-01	TCGA-LN-A7HX-01A	4b2ed40f-75fd-4388-8494-26b73bfbac24.methylation	372.0	0	local_clinical_tsv	72.6	male		TRUE	FALSE	FALSE	pass
TCGA_ESCA_ESCC_FC_B02v1__TCGA-LN-A7HY	TCGA_ESCA_ESCC_FC_B02v1	TCGA-LN-A7HY	TCGA-LN-A7HY-01	Primary Tumor	ESCC	multi-omics	TCGA-LN-A7HY-01	TCGA-LN-A7HY-01	TCGA-LN-A7HY-01A	817f7d08-ec5b-4338-952e-e8000a7f92b9.methylation	366.0	0	local_clinical_tsv	50.092	male		TRUE	FALSE	FALSE	pass
TCGA_ESCA_ESCC_FC_B02v1__TCGA-LN-A7HZ	TCGA_ESCA_ESCC_FC_B02v1	TCGA-LN-A7HZ	TCGA-LN-A7HZ-01	Primary Tumor	ESCC	multi-omics	TCGA-LN-A7HZ-01	TCGA-LN-A7HZ-01	TCGA-LN-A7HZ-01A	386dd1fb-3cb0-4794-b698-ebcd75480e48.methylation	401.0	0	local_clinical_tsv	49.413	male		TRUE	FALSE	FALSE	pass
TCGA_ESCA_ESCC_FC_B02v1__TCGA-LN-A8HZ	TCGA_ESCA_ESCC_FC_B02v1	TCGA-LN-A8HZ	TCGA-LN-A8HZ-01	Primary Tumor	ESCC	multi-omics	TCGA-LN-A8HZ-01	TCGA-LN-A8HZ-01	TCGA-LN-A8HZ-01A	59a16fe3-66de-468e-9e83-8135abf26909.methylation	375.0	0	local_clinical_tsv	56.153	male		TRUE	FALSE	FALSE	pass
TCGA_ESCA_ESCC_FC_B02v1__TCGA-LN-A8I0	TCGA_ESCA_ESCC_FC_B02v1	TCGA-LN-A8I0	TCGA-LN-A8I0-01	Primary Tumor	ESCC	multi-omics	TCGA-LN-A8I0-01	TCGA-LN-A8I0-01	TCGA-LN-A8I0-01A	fe20dca0-bb6b-42a2-a9ce-4e1beac7d658.methylation	407.0	0	local_clinical_tsv	52.917	male		TRUE	FALSE	FALSE	pass
TCGA_ESCA_ESCC_FC_B02v1__TCGA-LN-A8I1	TCGA_ESCA_ESCC_FC_B02v1	TCGA-LN-A8I1	TCGA-LN-A8I1-01	Primary Tumor	ESCC	multi-omics	TCGA-LN-A8I1-01	TCGA-LN-A8I1-01	TCGA-LN-A8I1-01A	ba025600-5f15-438c-b4f3-ff95fe1933ea.methylation	401.0	0	local_clinical_tsv	67.217	female		TRUE	FALSE	FALSE	pass
TCGA_ESCA_ESCC_FC_B02v1__TCGA-LN-A9FO	TCGA_ESCA_ESCC_FC_B02v1	TCGA-LN-A9FO	TCGA-LN-A9FO-01	Primary Tumor	ESCC	multi-omics	TCGA-LN-A9FO-01	TCGA-LN-A9FO-01	TCGA-LN-A9FO-01A	8e775d34-4fb6-479e-a906-dbb906e7f934.methylation	4.0	0	local_clinical_tsv	42.576	male		TRUE	FALSE	FALSE	pass
TCGA_ESCA_ESCC_FC_B02v1__TCGA-LN-A9FP	TCGA_ESCA_ESCC_FC_B02v1	TCGA-LN-A9FP	TCGA-LN-A9FP-01	Primary Tumor	ESCC	multi-omics	TCGA-LN-A9FP-01	TCGA-LN-A9FP-01	TCGA-LN-A9FP-01A	5fb1e875-0728-40fa-93dc-6c1bc7fff3ec.methylation	366.0	0	local_clinical_tsv	60.517	female		TRUE	FALSE	FALSE	pass
TCGA_ESCA_ESCC_FC_B02v1__TCGA-LN-A9FQ	TCGA_ESCA_ESCC_FC_B02v1	TCGA-LN-A9FQ	TCGA-LN-A9FQ-01	Primary Tumor	ESCC	multi-omics	TCGA-LN-A9FQ-01	TCGA-LN-A9FQ-01	TCGA-LN-A9FQ-01A	9cdcc69e-f86d-4929-94c7-ed86e64e5df7.methylation	391.0	0	local_clinical_tsv	62.196	male		TRUE	FALSE	FALSE	pass
TCGA_ESCA_ESCC_FC_B02v1__TCGA-LN-A9FR	TCGA_ESCA_ESCC_FC_B02v1	TCGA-LN-A9FR	TCGA-LN-A9FR-01	Primary Tumor	ESCC	multi-omics	TCGA-LN-A9FR-01	TCGA-LN-A9FR-01	TCGA-LN-A9FR-01A	509f82a9-f8b4-4b49-ad7b-8cfc94f3b56c.methylation	373.0	0	local_clinical_tsv	70.245	male		TRUE	FALSE	FALSE	pass
TCGA_ESCA_ESCC_FC_B02v1__TCGA-Q9-A6FU	TCGA_ESCA_ESCC_FC_B02v1	TCGA-Q9-A6FU	TCGA-Q9-A6FU-01	Primary Tumor	ESCC	multi-omics	TCGA-Q9-A6FU-01	TCGA-Q9-A6FU-01	TCGA-Q9-A6FU-01A	5226a1a9-4320-403a-bf11-7312963e9d95.methylation	157.0	1	local_clinical_tsv	58.062	female		TRUE	FALSE	FALSE	pass
TCGA_ESCA_ESCC_FC_B02v1__TCGA-S8-A6BW	TCGA_ESCA_ESCC_FC_B02v1	TCGA-S8-A6BW	TCGA-S8-A6BW-01	Primary Tumor	ESCC	multi-omics	TCGA-S8-A6BW-01	TCGA-S8-A6BW-01	TCGA-S8-A6BW-01A	91626201-aca4-4757-8717-db000608498d.methylation	620.0	0	local_clinical_tsv	51.866	male		TRUE	FALSE	FALSE	pass
TCGA_ESCA_ESCC_FC_B02v1__TCGA-V5-A7RC	TCGA_ESCA_ESCC_FC_B02v1	TCGA-V5-A7RC	TCGA-V5-A7RC-01	Primary Tumor	ESCC	multi-omics	TCGA-V5-A7RC-01	TCGA-V5-A7RC-01	TCGA-V5-A7RC-01B	7a872741-88aa-46be-ba7b-7903cf6b02e8.methylation	104.0	1	local_clinical_tsv	56.2	male		TRUE	FALSE	FALSE	pass
TCGA_ESCA_ESCC_FC_B02v1__TCGA-V5-AASV	TCGA_ESCA_ESCC_FC_B02v1	TCGA-V5-AASV	TCGA-V5-AASV-01	Primary Tumor	ESCC	multi-omics	TCGA-V5-AASV-01	TCGA-V5-AASV-01	TCGA-V5-AASV-01A	fd270629-5fb4-4be0-a1bb-e74f13a98110.methylation	467.0	0	local_clinical_tsv	68.12	male		TRUE	FALSE	FALSE	pass
TCGA_ESCA_ESCC_FC_B02v1__TCGA-VR-A8EO	TCGA_ESCA_ESCC_FC_B02v1	TCGA-VR-A8EO	TCGA-VR-A8EO-01	Primary Tumor	ESCC	multi-omics	TCGA-VR-A8EO-01	TCGA-VR-A8EO-01	TCGA-VR-A8EO-01A	05885b15-3d3c-47c6-81a4-81a3988d1159.methylation	785.0	0	local_clinical_tsv	49.618	male		TRUE	FALSE	FALSE	pass
TCGA_ESCA_ESCC_FC_B02v1__TCGA-VR-A8EP	TCGA_ESCA_ESCC_FC_B02v1	TCGA-VR-A8EP	TCGA-VR-A8EP-01	Primary Tumor	ESCC	multi-omics	TCGA-VR-A8EP-01	TCGA-VR-A8EP-01	TCGA-VR-A8EP-01A	29049b8d-3c32-4e2b-b734-b5931804f45a.methylation	824.0	0	local_clinical_tsv	51.86	male		TRUE	FALSE	FALSE	pass
TCGA_ESCA_ESCC_FC_B02v1__TCGA-VR-A8ER	TCGA_ESCA_ESCC_FC_B02v1	TCGA-VR-A8ER	TCGA-VR-A8ER-01	Primary Tumor	ESCC	multi-omics	TCGA-VR-A8ER-01	TCGA-VR-A8ER-01	TCGA-VR-A8ER-01A	d53d85eb-0e48-45e0-a96d-71716f91abdf.methylation	378.0	1	local_clinical_tsv	54.623	male		TRUE	FALSE	FALSE	pass
TCGA_ESCA_ESCC_FC_B02v1__TCGA-VR-A8ET	TCGA_ESCA_ESCC_FC_B02v1	TCGA-VR-A8ET	TCGA-VR-A8ET-01	Primary Tumor	ESCC	multi-omics	TCGA-VR-A8ET-01	TCGA-VR-A8ET-01	TCGA-VR-A8ET-01A	0ab50f59-1f9e-4b40-8e81-9bab1bc6e580.methylation	47.0	1	local_clinical_tsv	64.386	male		TRUE	FALSE	FALSE	pass
TCGA_ESCA_ESCC_FC_B02v1__TCGA-VR-A8EU	TCGA_ESCA_ESCC_FC_B02v1	TCGA-VR-A8EU	TCGA-VR-A8EU-01	Primary Tumor	ESCC	multi-omics	TCGA-VR-A8EU-01	TCGA-VR-A8EU-01	TCGA-VR-A8EU-01A	467a122c-1c32-4667-99c4-2e2dbb90a31d.methylation	557.0	1	local_clinical_tsv	51.228	male		TRUE	FALSE	FALSE	pass
TCGA_ESCA_ESCC_FC_B02v1__TCGA-VR-A8EW	TCGA_ESCA_ESCC_FC_B02v1	TCGA-VR-A8EW	TCGA-VR-A8EW-01	Primary Tumor	ESCC	multi-omics	TCGA-VR-A8EW-01	TCGA-VR-A8EW-01	TCGA-VR-A8EW-01A	c03aaba8-3191-4938-921a-7a1d1ce3ced7.methylation	247.0	1	local_clinical_tsv	57.227	male		TRUE	FALSE	FALSE	pass
TCGA_ESCA_ESCC_FC_B02v1__TCGA-VR-A8EX	TCGA_ESCA_ESCC_FC_B02v1	TCGA-VR-A8EX	TCGA-VR-A8EX-01	Primary Tumor	ESCC	multi-omics	TCGA-VR-A8EX-01	TCGA-VR-A8EX-01	TCGA-VR-A8EX-01A	0250df20-f88b-48fb-bf83-06a17852408d.methylation	855.0	1	local_clinical_tsv	63.589	male		TRUE	FALSE	FALSE	pass
TCGA_ESCA_ESCC_FC_B02v1__TCGA-VR-A8EY	TCGA_ESCA_ESCC_FC_B02v1	TCGA-VR-A8EY	TCGA-VR-A8EY-01	Primary Tumor	ESCC	multi-omics	TCGA-VR-A8EY-01	TCGA-VR-A8EY-01	TCGA-VR-A8EY-01A	b32a86ea-2ab8-434b-a192-4998642ad414.methylation	1025.0	0	local_clinical_tsv	44.504	female		TRUE	FALSE	FALSE	pass
TCGA_ESCA_ESCC_FC_B02v1__TCGA-VR-A8EZ	TCGA_ESCA_ESCC_FC_B02v1	TCGA-VR-A8EZ	TCGA-VR-A8EZ-01	Primary Tumor	ESCC	multi-omics	TCGA-VR-A8EZ-01	TCGA-VR-A8EZ-01	TCGA-VR-A8EZ-01A	be9c0594-ecf2-487b-ac7c-800116876ec5.methylation	553.0	1	local_clinical_tsv	47.773	male		TRUE	FALSE	FALSE	pass
TCGA_ESCA_ESCC_FC_B02v1__TCGA-VR-AA4G	TCGA_ESCA_ESCC_FC_B02v1	TCGA-VR-AA4G	TCGA-VR-AA4G-01	Primary Tumor	ESCC	multi-omics	TCGA-VR-AA4G-01	TCGA-VR-AA4G-01	TCGA-VR-AA4G-01A	f71b01d8-0be8-47ec-9e4f-2375169363b5.methylation	549.0	0	local_clinical_tsv	51.77	female		TRUE	FALSE	FALSE	pass
TCGA_ESCA_ESCC_FC_B02v1__TCGA-VR-AA7B	TCGA_ESCA_ESCC_FC_B02v1	TCGA-VR-AA7B	TCGA-VR-AA7B-01	Primary Tumor	ESCC	multi-omics	TCGA-VR-AA7B-01	TCGA-VR-AA7B-01	TCGA-VR-AA7B-01A	e522c37a-d9cc-4aa4-afd3-e494bb6eecff.methylation	342.0	0	local_clinical_tsv	66.042	female		TRUE	FALSE	FALSE	pass
TCGA_ESCA_ESCC_FC_B02v1__TCGA-VR-AA7D	TCGA_ESCA_ESCC_FC_B02v1	TCGA-VR-AA7D	TCGA-VR-AA7D-01	Primary Tumor	ESCC	multi-omics	TCGA-VR-AA7D-01	TCGA-VR-AA7D-01	TCGA-VR-AA7D-01A	ea84502f-1808-49a5-a423-072b2543b225.methylation	279.0	1	local_clinical_tsv	59.444	male		TRUE	FALSE	FALSE	pass
TCGA_ESCA_ESCC_FC_B02v1__TCGA-VR-AA7I	TCGA_ESCA_ESCC_FC_B02v1	TCGA-VR-AA7I	TCGA-VR-AA7I-01	Primary Tumor	ESCC	multi-omics	TCGA-VR-AA7I-01	TCGA-VR-AA7I-01	TCGA-VR-AA7I-01A	3ae70dce-b3a9-4953-9cf9-85bbfdf3cb4b.methylation	484.0	1	local_clinical_tsv	70.787	male		TRUE	FALSE	FALSE	pass
TCGA_ESCA_ESCC_FC_B02v1__TCGA-XP-A8T6	TCGA_ESCA_ESCC_FC_B02v1	TCGA-XP-A8T6	TCGA-XP-A8T6-01	Primary Tumor	ESCC	multi-omics	TCGA-XP-A8T6-01	TCGA-XP-A8T6-01	TCGA-XP-A8T6-01A	591de417-2282-4837-8d13-590202df0254.methylation	763.0	1	local_clinical_tsv	54.445	male		TRUE	FALSE	FALSE	pass
TCGA_ESCA_ESCC_FC_B02v1__TCGA-XP-A8T8	TCGA_ESCA_ESCC_FC_B02v1	TCGA-XP-A8T8	TCGA-XP-A8T8-01	Primary Tumor	ESCC	multi-omics	TCGA-XP-A8T8-01	TCGA-XP-A8T8-01	TCGA-XP-A8T8-01A	7793c0b0-ce48-494a-a612-ab8ba32e6f7d.methylation	437.0	0	local_clinical_tsv	49.413	male		TRUE	FALSE	FALSE	pass
TCGA_ESCA_ESCC_FC_B02v1__TCGA-Z6-A8JD	TCGA_ESCA_ESCC_FC_B02v1	TCGA-Z6-A8JD	TCGA-Z6-A8JD-01	Primary Tumor	ESCC	multi-omics	TCGA-Z6-A8JD-01	TCGA-Z6-A8JD-01	TCGA-Z6-A8JD-01A	122ad287-5fab-4910-9308-4dbac439f065.methylation	104.0	0	local_clinical_tsv	53.451	male		TRUE	FALSE	FALSE	pass
TCGA_ESCA_ESCC_FC_B02v1__TCGA-Z6-A8JE	TCGA_ESCA_ESCC_FC_B02v1	TCGA-Z6-A8JE	TCGA-Z6-A8JE-01	Primary Tumor	ESCC	multi-omics	TCGA-Z6-A8JE-01	TCGA-Z6-A8JE-01	TCGA-Z6-A8JE-01A	efe4034f-014b-4e06-a14d-51ec09276f0a.methylation	64.0	0	local_clinical_tsv	57.098	male		TRUE	FALSE	FALSE	pass
TCGA_ESCA_ESCC_FC_B02v1__TCGA-Z6-A9VB	TCGA_ESCA_ESCC_FC_B02v1	TCGA-Z6-A9VB	TCGA-Z6-A9VB-01	Primary Tumor	ESCC	multi-omics	TCGA-Z6-A9VB-01	TCGA-Z6-A9VB-01	TCGA-Z6-A9VB-01A	af86be1c-04ff-48ff-9785-89fd5b9d36f5.methylation	40.0	0	local_clinical_tsv	53.306	male		TRUE	FALSE	FALSE	pass
TCGA_ESCA_ESCC_FC_B02v1__TCGA-Z6-AAPN	TCGA_ESCA_ESCC_FC_B02v1	TCGA-Z6-AAPN	TCGA-Z6-AAPN-01	Primary Tumor	ESCC	multi-omics	TCGA-Z6-AAPN-01	TCGA-Z6-AAPN-01	TCGA-Z6-AAPN-01A	0dc14fe1-6c95-4b3f-a2ef-ca1a3a601e3b.methylation	81.0	0	local_clinical_tsv	57.292	male		TRUE	FALSE	FALSE	pass
TCGA_ESCA_ESCC_FC_B02v1__TCGA-IG-A4QT	TCGA_ESCA_ESCC_FC_B02v1	TCGA-IG-A4QT	TCGA-IG-A4QT-01	Primary Tumor	ESCC	multi-omics	TCGA-IG-A4QT-01	TCGA-IG-A4QT-01	TCGA-IG-A4QT-01A	0d6b096e-47e8-4878-87c8-fe8e53c15db2.methylation	283.0	1	GDC_cases_API_recovery	56.142	male	Stage IIA	TRUE	FALSE	FALSE	pass
TCGA_ESCA_ESCC_FC_B02v1__TCGA-JY-A6FA	TCGA_ESCA_ESCC_FC_B02v1	TCGA-JY-A6FA	TCGA-JY-A6FA-01	Primary Tumor	ESCC	multi-omics	TCGA-JY-A6FA-01	TCGA-JY-A6FA-01	TCGA-JY-A6FA-01A	78c0f41b-5643-405f-b458-a979c83c055d.methylation	1361.0	1	GDC_cases_API_recovery	53.265	male		TRUE	FALSE	FALSE	pass
TCGA_ESCA_ESCC_FC_B02v1__TCGA-LN-A49V	TCGA_ESCA_ESCC_FC_B02v1	TCGA-LN-A49V	TCGA-LN-A49V-01	Primary Tumor	ESCC	multi-omics	TCGA-LN-A49V-01	TCGA-LN-A49V-01	TCGA-LN-A49V-01A	dc3d94cf-ae37-4f14-95a6-3c9ec682b028.methylation	383.0	0	GDC_cases_API_recovery	49.068	male	Stage IIA	TRUE	FALSE	FALSE	pass
TCGA_ESCA_ESCC_FC_B02v1__TCGA-VR-A8Q7	TCGA_ESCA_ESCC_FC_B02v1	TCGA-VR-A8Q7	TCGA-VR-A8Q7-01	Primary Tumor	ESCC	multi-omics	TCGA-VR-A8Q7-01	TCGA-VR-A8Q7-01	TCGA-VR-A8Q7-01A	9c1e53be-6fa5-4a2c-856c-e6ab02f555ce.methylation	1590.0	0	GDC_cases_API_recovery	60.641	male	Stage IIIA	TRUE	FALSE	FALSE	pass
GEO_GSE53625_DEP_B02v1__GSM1296956	GEO_GSE53625_DEP_B02v1	GSM1296956	GSM1296956	Tumor	ESCC	microarray	GSM1296956				11.6333333333333	1	GSE53625_clin.tsv				FALSE	TRUE	FALSE	pass
GEO_GSE53625_DEP_B02v1__GSM1296958	GEO_GSE53625_DEP_B02v1	GSM1296958	GSM1296958	Tumor	ESCC	microarray	GSM1296958				58.2	0	GSE53625_clin.tsv				FALSE	TRUE	FALSE	pass
GEO_GSE53625_DEP_B02v1__GSM1296960	GEO_GSE53625_DEP_B02v1	GSM1296960	GSM1296960	Tumor	ESCC	microarray	GSM1296960				39.1666666666667	1	GSE53625_clin.tsv				FALSE	TRUE	FALSE	pass
GEO_GSE53625_DEP_B02v1__GSM1296962	GEO_GSE53625_DEP_B02v1	GSM1296962	GSM1296962	Tumor	ESCC	microarray	GSM1296962				57.7333333333333	0	GSE53625_clin.tsv				FALSE	TRUE	FALSE	pass
GEO_GSE53625_DEP_B02v1__GSM1296964	GEO_GSE53625_DEP_B02v1	GSM1296964	GSM1296964	Tumor	ESCC	microarray	GSM1296964				11.0666666666667	1	GSE53625_clin.tsv				FALSE	TRUE	FALSE	pass
GEO_GSE53625_DEP_B02v1__GSM1296966	GEO_GSE53625_DEP_B02v1	GSM1296966	GSM1296966	Tumor	ESCC	microarray	GSM1296966				55.2666666666667	0	GSE53625_clin.tsv				FALSE	TRUE	FALSE	pass
GEO_GSE53625_DEP_B02v1__GSM1296968	GEO_GSE53625_DEP_B02v1	GSM1296968	GSM1296968	Tumor	ESCC	microarray	GSM1296968				55.2666666666667	0	GSE53625_clin.tsv				FALSE	TRUE	FALSE	pass
GEO_GSE53625_DEP_B02v1__GSM1296970	GEO_GSE53625_DEP_B02v1	GSM1296970	GSM1296970	Tumor	ESCC	microarray	GSM1296970				29.7	1	GSE53625_clin.tsv				FALSE	TRUE	FALSE	pass
GEO_GSE53625_DEP_B02v1__GSM1296972	GEO_GSE53625_DEP_B02v1	GSM1296972	GSM1296972	Tumor	ESCC	microarray	GSM1296972				10.9666666666667	1	GSE53625_clin.tsv				FALSE	TRUE	FALSE	pass
GEO_GSE53625_DEP_B02v1__GSM1296974	GEO_GSE53625_DEP_B02v1	GSM1296974	GSM1296974	Tumor	ESCC	microarray	GSM1296974				57.6	0	GSE53625_clin.tsv				FALSE	TRUE	FALSE	pass
GEO_GSE53625_DEP_B02v1__GSM1296976	GEO_GSE53625_DEP_B02v1	GSM1296976	GSM1296976	Tumor	ESCC	microarray	GSM1296976				57.5333333333333	0	GSE53625_clin.tsv				FALSE	TRUE	FALSE	pass
GEO_GSE53625_DEP_B02v1__GSM1296978	GEO_GSE53625_DEP_B02v1	GSM1296978	GSM1296978	Tumor	ESCC	microarray	GSM1296978				57.3666666666667	0	GSE53625_clin.tsv				FALSE	TRUE	FALSE	pass
GEO_GSE53625_DEP_B02v1__GSM1296980	GEO_GSE53625_DEP_B02v1	GSM1296980	GSM1296980	Tumor	ESCC	microarray	GSM1296980				57.2666666666667	0	GSE53625_clin.tsv				FALSE	TRUE	FALSE	pass
GEO_GSE53625_DEP_B02v1__GSM1296982	GEO_GSE53625_DEP_B02v1	GSM1296982	GSM1296982	Tumor	ESCC	microarray	GSM1296982				57.2333333333333	0	GSE53625_clin.tsv				FALSE	TRUE	FALSE	pass
GEO_GSE53625_DEP_B02v1__GSM1296984	GEO_GSE53625_DEP_B02v1	GSM1296984	GSM1296984	Tumor	ESCC	microarray	GSM1296984				13	1	GSE53625_clin.tsv				FALSE	TRUE	FALSE	pass
GEO_GSE53625_DEP_B02v1__GSM1296986	GEO_GSE53625_DEP_B02v1	GSM1296986	GSM1296986	Tumor	ESCC	microarray	GSM1296986				5.7	1	GSE53625_clin.tsv				FALSE	TRUE	FALSE	pass
GEO_GSE53625_DEP_B02v1__GSM1296988	GEO_GSE53625_DEP_B02v1	GSM1296988	GSM1296988	Tumor	ESCC	microarray	GSM1296988				56.6333333333333	0	GSE53625_clin.tsv				FALSE	TRUE	FALSE	pass
GEO_GSE53625_DEP_B02v1__GSM1296990	GEO_GSE53625_DEP_B02v1	GSM1296990	GSM1296990	Tumor	ESCC	microarray	GSM1296990				56.6333333333333	0	GSE53625_clin.tsv				FALSE	TRUE	FALSE	pass
GEO_GSE53625_DEP_B02v1__GSM1296992	GEO_GSE53625_DEP_B02v1	GSM1296992	GSM1296992	Tumor	ESCC	microarray	GSM1296992				56.1333333333333	0	GSE53625_clin.tsv				FALSE	TRUE	FALSE	pass
GEO_GSE53625_DEP_B02v1__GSM1296994	GEO_GSE53625_DEP_B02v1	GSM1296994	GSM1296994	Tumor	ESCC	microarray	GSM1296994				55.6666666666667	0	GSE53625_clin.tsv				FALSE	TRUE	FALSE	pass
GEO_GSE53625_DEP_B02v1__GSM1296996	GEO_GSE53625_DEP_B02v1	GSM1296996	GSM1296996	Tumor	ESCC	microarray	GSM1296996				6.26666666666667	1	GSE53625_clin.tsv				FALSE	TRUE	FALSE	pass
GEO_GSE53625_DEP_B02v1__GSM1296998	GEO_GSE53625_DEP_B02v1	GSM1296998	GSM1296998	Tumor	ESCC	microarray	GSM1296998				25.4666666666667	1	GSE53625_clin.tsv				FALSE	TRUE	FALSE	pass
GEO_GSE53625_DEP_B02v1__GSM1297000	GEO_GSE53625_DEP_B02v1	GSM1297000	GSM1297000	Tumor	ESCC	microarray	GSM1297000				10.2	1	GSE53625_clin.tsv				FALSE	TRUE	FALSE	pass
GEO_GSE53625_DEP_B02v1__GSM1297002	GEO_GSE53625_DEP_B02v1	GSM1297002	GSM1297002	Tumor	ESCC	microarray	GSM1297002				13.1666666666667	1	GSE53625_clin.tsv				FALSE	TRUE	FALSE	pass
GEO_GSE53625_DEP_B02v1__GSM1297004	GEO_GSE53625_DEP_B02v1	GSM1297004	GSM1297004	Tumor	ESCC	microarray	GSM1297004				54.7333333333333	0	GSE53625_clin.tsv				FALSE	TRUE	FALSE	pass
GEO_GSE53625_DEP_B02v1__GSM1297006	GEO_GSE53625_DEP_B02v1	GSM1297006	GSM1297006	Tumor	ESCC	microarray	GSM1297006				18.0666666666667	1	GSE53625_clin.tsv				FALSE	TRUE	FALSE	pass
GEO_GSE53625_DEP_B02v1__GSM1297008	GEO_GSE53625_DEP_B02v1	GSM1297008	GSM1297008	Tumor	ESCC	microarray	GSM1297008				36.3	1	GSE53625_clin.tsv				FALSE	TRUE	FALSE	pass
GEO_GSE53625_DEP_B02v1__GSM1297010	GEO_GSE53625_DEP_B02v1	GSM1297010	GSM1297010	Tumor	ESCC	microarray	GSM1297010				54.1	0	GSE53625_clin.tsv				FALSE	TRUE	FALSE	pass
GEO_GSE53625_DEP_B02v1__GSM1297012	GEO_GSE53625_DEP_B02v1	GSM1297012	GSM1297012	Tumor	ESCC	microarray	GSM1297012				16.0333333333333	1	GSE53625_clin.tsv				FALSE	TRUE	FALSE	pass
GEO_GSE53625_DEP_B02v1__GSM1297014	GEO_GSE53625_DEP_B02v1	GSM1297014	GSM1297014	Tumor	ESCC	microarray	GSM1297014				52.9333333333333	0	GSE53625_clin.tsv				FALSE	TRUE	FALSE	pass
GEO_GSE53625_DEP_B02v1__GSM1297016	GEO_GSE53625_DEP_B02v1	GSM1297016	GSM1297016	Tumor	ESCC	microarray	GSM1297016				52.7	0	GSE53625_clin.tsv				FALSE	TRUE	FALSE	pass
GEO_GSE53625_DEP_B02v1__GSM1297018	GEO_GSE53625_DEP_B02v1	GSM1297018	GSM1297018	Tumor	ESCC	microarray	GSM1297018				8.46666666666667	1	GSE53625_clin.tsv				FALSE	TRUE	FALSE	pass
GEO_GSE53625_DEP_B02v1__GSM1297020	GEO_GSE53625_DEP_B02v1	GSM1297020	GSM1297020	Tumor	ESCC	microarray	GSM1297020				4.36666666666667	1	GSE53625_clin.tsv				FALSE	TRUE	FALSE	pass
GEO_GSE53625_DEP_B02v1__GSM1297022	GEO_GSE53625_DEP_B02v1	GSM1297022	GSM1297022	Tumor	ESCC	microarray	GSM1297022				52.0333333333333	0	GSE53625_clin.tsv				FALSE	TRUE	FALSE	pass
GEO_GSE53625_DEP_B02v1__GSM1297024	GEO_GSE53625_DEP_B02v1	GSM1297024	GSM1297024	Tumor	ESCC	microarray	GSM1297024				8.76666666666667	1	GSE53625_clin.tsv				FALSE	TRUE	FALSE	pass
GEO_GSE53625_DEP_B02v1__GSM1297026	GEO_GSE53625_DEP_B02v1	GSM1297026	GSM1297026	Tumor	ESCC	microarray	GSM1297026				1.66666666666667	1	GSE53625_clin.tsv				FALSE	TRUE	FALSE	pass
GEO_GSE53625_DEP_B02v1__GSM1297028	GEO_GSE53625_DEP_B02v1	GSM1297028	GSM1297028	Tumor	ESCC	microarray	GSM1297028				51.3	0	GSE53625_clin.tsv				FALSE	TRUE	FALSE	pass
GEO_GSE53625_DEP_B02v1__GSM1297030	GEO_GSE53625_DEP_B02v1	GSM1297030	GSM1297030	Tumor	ESCC	microarray	GSM1297030				51.2	0	GSE53625_clin.tsv				FALSE	TRUE	FALSE	pass
GEO_GSE53625_DEP_B02v1__GSM1297032	GEO_GSE53625_DEP_B02v1	GSM1297032	GSM1297032	Tumor	ESCC	microarray	GSM1297032				51.1	0	GSE53625_clin.tsv				FALSE	TRUE	FALSE	pass
GEO_GSE53625_DEP_B02v1__GSM1297034	GEO_GSE53625_DEP_B02v1	GSM1297034	GSM1297034	Tumor	ESCC	microarray	GSM1297034				11.4	1	GSE53625_clin.tsv				FALSE	TRUE	FALSE	pass
GEO_GSE53625_DEP_B02v1__GSM1297036	GEO_GSE53625_DEP_B02v1	GSM1297036	GSM1297036	Tumor	ESCC	microarray	GSM1297036				39.5	1	GSE53625_clin.tsv				FALSE	TRUE	FALSE	pass
GEO_GSE53625_DEP_B02v1__GSM1297038	GEO_GSE53625_DEP_B02v1	GSM1297038	GSM1297038	Tumor	ESCC	microarray	GSM1297038				19.1666666666667	1	GSE53625_clin.tsv				FALSE	TRUE	FALSE	pass
GEO_GSE53625_DEP_B02v1__GSM1297040	GEO_GSE53625_DEP_B02v1	GSM1297040	GSM1297040	Tumor	ESCC	microarray	GSM1297040				8.5	1	GSE53625_clin.tsv				FALSE	TRUE	FALSE	pass
GEO_GSE53625_DEP_B02v1__GSM1297042	GEO_GSE53625_DEP_B02v1	GSM1297042	GSM1297042	Tumor	ESCC	microarray	GSM1297042				17.9	1	GSE53625_clin.tsv				FALSE	TRUE	FALSE	pass
GEO_GSE53625_DEP_B02v1__GSM1297044	GEO_GSE53625_DEP_B02v1	GSM1297044	GSM1297044	Tumor	ESCC	microarray	GSM1297044				50.6	0	GSE53625_clin.tsv				FALSE	TRUE	FALSE	pass
GEO_GSE53625_DEP_B02v1__GSM1297046	GEO_GSE53625_DEP_B02v1	GSM1297046	GSM1297046	Tumor	ESCC	microarray	GSM1297046				50.1666666666667	0	GSE53625_clin.tsv				FALSE	TRUE	FALSE	pass
GEO_GSE53625_DEP_B02v1__GSM1297048	GEO_GSE53625_DEP_B02v1	GSM1297048	GSM1297048	Tumor	ESCC	microarray	GSM1297048				24.4666666666667	1	GSE53625_clin.tsv				FALSE	TRUE	FALSE	pass
GEO_GSE53625_DEP_B02v1__GSM1297050	GEO_GSE53625_DEP_B02v1	GSM1297050	GSM1297050	Tumor	ESCC	microarray	GSM1297050				49.4333333333333	0	GSE53625_clin.tsv				FALSE	TRUE	FALSE	pass
GEO_GSE53625_DEP_B02v1__GSM1297052	GEO_GSE53625_DEP_B02v1	GSM1297052	GSM1297052	Tumor	ESCC	microarray	GSM1297052				32.0666666666667	1	GSE53625_clin.tsv				FALSE	TRUE	FALSE	pass
GEO_GSE53625_DEP_B02v1__GSM1297054	GEO_GSE53625_DEP_B02v1	GSM1297054	GSM1297054	Tumor	ESCC	microarray	GSM1297054				25.1666666666667	1	GSE53625_clin.tsv				FALSE	TRUE	FALSE	pass
GEO_GSE53625_DEP_B02v1__GSM1297056	GEO_GSE53625_DEP_B02v1	GSM1297056	GSM1297056	Tumor	ESCC	microarray	GSM1297056				6.63333333333333	1	GSE53625_clin.tsv				FALSE	TRUE	FALSE	pass
GEO_GSE53625_DEP_B02v1__GSM1297058	GEO_GSE53625_DEP_B02v1	GSM1297058	GSM1297058	Tumor	ESCC	microarray	GSM1297058				48.4333333333333	0	GSE53625_clin.tsv				FALSE	TRUE	FALSE	pass
GEO_GSE53625_DEP_B02v1__GSM1297060	GEO_GSE53625_DEP_B02v1	GSM1297060	GSM1297060	Tumor	ESCC	microarray	GSM1297060				11.4	1	GSE53625_clin.tsv				FALSE	TRUE	FALSE	pass
GEO_GSE53625_DEP_B02v1__GSM1297062	GEO_GSE53625_DEP_B02v1	GSM1297062	GSM1297062	Tumor	ESCC	microarray	GSM1297062				48.0333333333333	0	GSE53625_clin.tsv				FALSE	TRUE	FALSE	pass
GEO_GSE53625_DEP_B02v1__GSM1297064	GEO_GSE53625_DEP_B02v1	GSM1297064	GSM1297064	Tumor	ESCC	microarray	GSM1297064				47.9333333333333	0	GSE53625_clin.tsv				FALSE	TRUE	FALSE	pass
GEO_GSE53625_DEP_B02v1__GSM1297066	GEO_GSE53625_DEP_B02v1	GSM1297066	GSM1297066	Tumor	ESCC	microarray	GSM1297066				6	1	GSE53625_clin.tsv				FALSE	TRUE	FALSE	pass
GEO_GSE53625_DEP_B02v1__GSM1297068	GEO_GSE53625_DEP_B02v1	GSM1297068	GSM1297068	Tumor	ESCC	microarray	GSM1297068				39.1666666666667	1	GSE53625_clin.tsv				FALSE	TRUE	FALSE	pass
GEO_GSE53625_DEP_B02v1__GSM1297070	GEO_GSE53625_DEP_B02v1	GSM1297070	GSM1297070	Tumor	ESCC	microarray	GSM1297070				29.8666666666667	1	GSE53625_clin.tsv				FALSE	TRUE	FALSE	pass
GEO_GSE53625_DEP_B02v1__GSM1297072	GEO_GSE53625_DEP_B02v1	GSM1297072	GSM1297072	Tumor	ESCC	microarray	GSM1297072				39.8333333333333	1	GSE53625_clin.tsv				FALSE	TRUE	FALSE	pass
GEO_GSE53625_DEP_B02v1__GSM1297074	GEO_GSE53625_DEP_B02v1	GSM1297074	GSM1297074	Tumor	ESCC	microarray	GSM1297074				44.9333333333333	1	GSE53625_clin.tsv				FALSE	TRUE	FALSE	pass
GEO_GSE53625_DEP_B02v1__GSM1297076	GEO_GSE53625_DEP_B02v1	GSM1297076	GSM1297076	Tumor	ESCC	microarray	GSM1297076				60.3	0	GSE53625_clin.tsv				FALSE	TRUE	FALSE	pass
GEO_GSE53625_DEP_B02v1__GSM1297078	GEO_GSE53625_DEP_B02v1	GSM1297078	GSM1297078	Tumor	ESCC	microarray	GSM1297078				27.5666666666667	1	GSE53625_clin.tsv				FALSE	TRUE	FALSE	pass
GEO_GSE53625_DEP_B02v1__GSM1297080	GEO_GSE53625_DEP_B02v1	GSM1297080	GSM1297080	Tumor	ESCC	microarray	GSM1297080				34.6666666666667	1	GSE53625_clin.tsv				FALSE	TRUE	FALSE	pass
GEO_GSE53625_DEP_B02v1__GSM1297082	GEO_GSE53625_DEP_B02v1	GSM1297082	GSM1297082	Tumor	ESCC	microarray	GSM1297082				60.9666666666667	0	GSE53625_clin.tsv				FALSE	TRUE	FALSE	pass
GEO_GSE53625_DEP_B02v1__GSM1297084	GEO_GSE53625_DEP_B02v1	GSM1297084	GSM1297084	Tumor	ESCC	microarray	GSM1297084				15.4333333333333	1	GSE53625_clin.tsv				FALSE	TRUE	FALSE	pass
GEO_GSE53625_DEP_B02v1__GSM1297086	GEO_GSE53625_DEP_B02v1	GSM1297086	GSM1297086	Tumor	ESCC	microarray	GSM1297086				61.3333333333333	0	GSE53625_clin.tsv				FALSE	TRUE	FALSE	pass
GEO_GSE53625_DEP_B02v1__GSM1297088	GEO_GSE53625_DEP_B02v1	GSM1297088	GSM1297088	Tumor	ESCC	microarray	GSM1297088				38.5333333333333	1	GSE53625_clin.tsv				FALSE	TRUE	FALSE	pass
GEO_GSE53625_DEP_B02v1__GSM1297090	GEO_GSE53625_DEP_B02v1	GSM1297090	GSM1297090	Tumor	ESCC	microarray	GSM1297090				23.2666666666667	1	GSE53625_clin.tsv				FALSE	TRUE	FALSE	pass
GEO_GSE53625_DEP_B02v1__GSM1297092	GEO_GSE53625_DEP_B02v1	GSM1297092	GSM1297092	Tumor	ESCC	microarray	GSM1297092				11	1	GSE53625_clin.tsv				FALSE	TRUE	FALSE	pass
GEO_GSE53625_DEP_B02v1__GSM1297094	GEO_GSE53625_DEP_B02v1	GSM1297094	GSM1297094	Tumor	ESCC	microarray	GSM1297094				23.1333333333333	1	GSE53625_clin.tsv				FALSE	TRUE	FALSE	pass
GEO_GSE53625_DEP_B02v1__GSM1297096	GEO_GSE53625_DEP_B02v1	GSM1297096	GSM1297096	Tumor	ESCC	microarray	GSM1297096				10.0333333333333	1	GSE53625_clin.tsv				FALSE	TRUE	FALSE	pass
GEO_GSE53625_DEP_B02v1__GSM1297098	GEO_GSE53625_DEP_B02v1	GSM1297098	GSM1297098	Tumor	ESCC	microarray	GSM1297098				7.8	1	GSE53625_clin.tsv				FALSE	TRUE	FALSE	pass
GEO_GSE53625_DEP_B02v1__GSM1297100	GEO_GSE53625_DEP_B02v1	GSM1297100	GSM1297100	Tumor	ESCC	microarray	GSM1297100				21.4333333333333	1	GSE53625_clin.tsv				FALSE	TRUE	FALSE	pass
GEO_GSE53625_DEP_B02v1__GSM1297102	GEO_GSE53625_DEP_B02v1	GSM1297102	GSM1297102	Tumor	ESCC	microarray	GSM1297102				61.9	0	GSE53625_clin.tsv				FALSE	TRUE	FALSE	pass
GEO_GSE53625_DEP_B02v1__GSM1297104	GEO_GSE53625_DEP_B02v1	GSM1297104	GSM1297104	Tumor	ESCC	microarray	GSM1297104				9.03333333333333	1	GSE53625_clin.tsv				FALSE	TRUE	FALSE	pass
GEO_GSE53625_DEP_B02v1__GSM1297106	GEO_GSE53625_DEP_B02v1	GSM1297106	GSM1297106	Tumor	ESCC	microarray	GSM1297106				42.0333333333333	1	GSE53625_clin.tsv				FALSE	TRUE	FALSE	pass
GEO_GSE53625_DEP_B02v1__GSM1297108	GEO_GSE53625_DEP_B02v1	GSM1297108	GSM1297108	Tumor	ESCC	microarray	GSM1297108				60.9666666666667	0	GSE53625_clin.tsv				FALSE	TRUE	FALSE	pass
GEO_GSE53625_DEP_B02v1__GSM1297110	GEO_GSE53625_DEP_B02v1	GSM1297110	GSM1297110	Tumor	ESCC	microarray	GSM1297110				61	0	GSE53625_clin.tsv				FALSE	TRUE	FALSE	pass
GEO_GSE53625_DEP_B02v1__GSM1297112	GEO_GSE53625_DEP_B02v1	GSM1297112	GSM1297112	Tumor	ESCC	microarray	GSM1297112				31.5	1	GSE53625_clin.tsv				FALSE	TRUE	FALSE	pass
GEO_GSE53625_DEP_B02v1__GSM1297114	GEO_GSE53625_DEP_B02v1	GSM1297114	GSM1297114	Tumor	ESCC	microarray	GSM1297114				60.6333333333333	0	GSE53625_clin.tsv				FALSE	TRUE	FALSE	pass
GEO_GSE53625_DEP_B02v1__GSM1297116	GEO_GSE53625_DEP_B02v1	GSM1297116	GSM1297116	Tumor	ESCC	microarray	GSM1297116				61.3	0	GSE53625_clin.tsv				FALSE	TRUE	FALSE	pass
GEO_GSE53625_DEP_B02v1__GSM1297118	GEO_GSE53625_DEP_B02v1	GSM1297118	GSM1297118	Tumor	ESCC	microarray	GSM1297118				61.2	0	GSE53625_clin.tsv				FALSE	TRUE	FALSE	pass
GEO_GSE53625_DEP_B02v1__GSM1297120	GEO_GSE53625_DEP_B02v1	GSM1297120	GSM1297120	Tumor	ESCC	microarray	GSM1297120				12.5666666666667	1	GSE53625_clin.tsv				FALSE	TRUE	FALSE	pass
GEO_GSE53625_DEP_B02v1__GSM1297122	GEO_GSE53625_DEP_B02v1	GSM1297122	GSM1297122	Tumor	ESCC	microarray	GSM1297122				24.4333333333333	1	GSE53625_clin.tsv				FALSE	TRUE	FALSE	pass
GEO_GSE53625_DEP_B02v1__GSM1297124	GEO_GSE53625_DEP_B02v1	GSM1297124	GSM1297124	Tumor	ESCC	microarray	GSM1297124				60.5666666666667	0	GSE53625_clin.tsv				FALSE	TRUE	FALSE	pass
GEO_GSE53625_DEP_B02v1__GSM1297126	GEO_GSE53625_DEP_B02v1	GSM1297126	GSM1297126	Tumor	ESCC	microarray	GSM1297126				21.2666666666667	1	GSE53625_clin.tsv				FALSE	TRUE	FALSE	pass
GEO_GSE53625_DEP_B02v1__GSM1297128	GEO_GSE53625_DEP_B02v1	GSM1297128	GSM1297128	Tumor	ESCC	microarray	GSM1297128				16.8333333333333	1	GSE53625_clin.tsv				FALSE	TRUE	FALSE	pass
GEO_GSE53625_DEP_B02v1__GSM1297130	GEO_GSE53625_DEP_B02v1	GSM1297130	GSM1297130	Tumor	ESCC	microarray	GSM1297130				69.9666666666667	0	GSE53625_clin.tsv				FALSE	TRUE	FALSE	pass
GEO_GSE53625_DEP_B02v1__GSM1297132	GEO_GSE53625_DEP_B02v1	GSM1297132	GSM1297132	Tumor	ESCC	microarray	GSM1297132				32.4666666666667	1	GSE53625_clin.tsv				FALSE	TRUE	FALSE	pass
GEO_GSE53625_DEP_B02v1__GSM1297134	GEO_GSE53625_DEP_B02v1	GSM1297134	GSM1297134	Tumor	ESCC	microarray	GSM1297134				12.2333333333333	1	GSE53625_clin.tsv				FALSE	TRUE	FALSE	pass
GEO_GSE53625_DEP_B02v1__GSM1297136	GEO_GSE53625_DEP_B02v1	GSM1297136	GSM1297136	Tumor	ESCC	microarray	GSM1297136				9	1	GSE53625_clin.tsv				FALSE	TRUE	FALSE	pass
GEO_GSE53625_DEP_B02v1__GSM1297138	GEO_GSE53625_DEP_B02v1	GSM1297138	GSM1297138	Tumor	ESCC	microarray	GSM1297138				3.83333333333333	1	GSE53625_clin.tsv				FALSE	TRUE	FALSE	pass
GEO_GSE53625_DEP_B02v1__GSM1297140	GEO_GSE53625_DEP_B02v1	GSM1297140	GSM1297140	Tumor	ESCC	microarray	GSM1297140				21.2333333333333	1	GSE53625_clin.tsv				FALSE	TRUE	FALSE	pass
GEO_GSE53625_DEP_B02v1__GSM1297142	GEO_GSE53625_DEP_B02v1	GSM1297142	GSM1297142	Tumor	ESCC	microarray	GSM1297142				45.8333333333333	1	GSE53625_clin.tsv				FALSE	TRUE	FALSE	pass
GEO_GSE53625_DEP_B02v1__GSM1297144	GEO_GSE53625_DEP_B02v1	GSM1297144	GSM1297144	Tumor	ESCC	microarray	GSM1297144				17.5	1	GSE53625_clin.tsv				FALSE	TRUE	FALSE	pass
GEO_GSE53625_DEP_B02v1__GSM1297146	GEO_GSE53625_DEP_B02v1	GSM1297146	GSM1297146	Tumor	ESCC	microarray	GSM1297146				6.2	1	GSE53625_clin.tsv				FALSE	TRUE	FALSE	pass
GEO_GSE53625_DEP_B02v1__GSM1297148	GEO_GSE53625_DEP_B02v1	GSM1297148	GSM1297148	Tumor	ESCC	microarray	GSM1297148				61.9333333333333	0	GSE53625_clin.tsv				FALSE	TRUE	FALSE	pass
GEO_GSE53625_DEP_B02v1__GSM1297150	GEO_GSE53625_DEP_B02v1	GSM1297150	GSM1297150	Tumor	ESCC	microarray	GSM1297150				24.4	1	GSE53625_clin.tsv				FALSE	TRUE	FALSE	pass
GEO_GSE53625_DEP_B02v1__GSM1297152	GEO_GSE53625_DEP_B02v1	GSM1297152	GSM1297152	Tumor	ESCC	microarray	GSM1297152				60.7333333333333	0	GSE53625_clin.tsv				FALSE	TRUE	FALSE	pass
GEO_GSE53625_DEP_B02v1__GSM1297154	GEO_GSE53625_DEP_B02v1	GSM1297154	GSM1297154	Tumor	ESCC	microarray	GSM1297154				15.8666666666667	1	GSE53625_clin.tsv				FALSE	TRUE	FALSE	pass
GEO_GSE53625_DEP_B02v1__GSM1297156	GEO_GSE53625_DEP_B02v1	GSM1297156	GSM1297156	Tumor	ESCC	microarray	GSM1297156				34.1666666666667	1	GSE53625_clin.tsv				FALSE	TRUE	FALSE	pass
GEO_GSE53625_DEP_B02v1__GSM1297158	GEO_GSE53625_DEP_B02v1	GSM1297158	GSM1297158	Tumor	ESCC	microarray	GSM1297158				9.76666666666667	1	GSE53625_clin.tsv				FALSE	TRUE	FALSE	pass
GEO_GSE53625_DEP_B02v1__GSM1297160	GEO_GSE53625_DEP_B02v1	GSM1297160	GSM1297160	Tumor	ESCC	microarray	GSM1297160				25.7333333333333	1	GSE53625_clin.tsv				FALSE	TRUE	FALSE	pass
GEO_GSE53625_DEP_B02v1__GSM1297162	GEO_GSE53625_DEP_B02v1	GSM1297162	GSM1297162	Tumor	ESCC	microarray	GSM1297162				22.1333333333333	1	GSE53625_clin.tsv				FALSE	TRUE	FALSE	pass
GEO_GSE53625_DEP_B02v1__GSM1297164	GEO_GSE53625_DEP_B02v1	GSM1297164	GSM1297164	Tumor	ESCC	microarray	GSM1297164				61.3666666666667	0	GSE53625_clin.tsv				FALSE	TRUE	FALSE	pass
GEO_GSE53625_DEP_B02v1__GSM1297166	GEO_GSE53625_DEP_B02v1	GSM1297166	GSM1297166	Tumor	ESCC	microarray	GSM1297166				61.3666666666667	0	GSE53625_clin.tsv				FALSE	TRUE	FALSE	pass
GEO_GSE53625_DEP_B02v1__GSM1297168	GEO_GSE53625_DEP_B02v1	GSM1297168	GSM1297168	Tumor	ESCC	microarray	GSM1297168				15.6	1	GSE53625_clin.tsv				FALSE	TRUE	FALSE	pass
GEO_GSE53625_DEP_B02v1__GSM1297170	GEO_GSE53625_DEP_B02v1	GSM1297170	GSM1297170	Tumor	ESCC	microarray	GSM1297170				6.33333333333333	1	GSE53625_clin.tsv				FALSE	TRUE	FALSE	pass
GEO_GSE53625_DEP_B02v1__GSM1297172	GEO_GSE53625_DEP_B02v1	GSM1297172	GSM1297172	Tumor	ESCC	microarray	GSM1297172				1.43333333333333	1	GSE53625_clin.tsv				FALSE	TRUE	FALSE	pass
GEO_GSE53625_DEP_B02v1__GSM1297174	GEO_GSE53625_DEP_B02v1	GSM1297174	GSM1297174	Tumor	ESCC	microarray	GSM1297174				8.26666666666667	1	GSE53625_clin.tsv				FALSE	TRUE	FALSE	pass
GEO_GSE53625_DEP_B02v1__GSM1297176	GEO_GSE53625_DEP_B02v1	GSM1297176	GSM1297176	Tumor	ESCC	microarray	GSM1297176				22.4	1	GSE53625_clin.tsv				FALSE	TRUE	FALSE	pass
GEO_GSE53625_DEP_B02v1__GSM1297178	GEO_GSE53625_DEP_B02v1	GSM1297178	GSM1297178	Tumor	ESCC	microarray	GSM1297178				22.7	1	GSE53625_clin.tsv				FALSE	TRUE	FALSE	pass
GEO_GSE53625_DEP_B02v1__GSM1297180	GEO_GSE53625_DEP_B02v1	GSM1297180	GSM1297180	Tumor	ESCC	microarray	GSM1297180				60.9	0	GSE53625_clin.tsv				FALSE	TRUE	FALSE	pass
GEO_GSE53625_DEP_B02v1__GSM1297182	GEO_GSE53625_DEP_B02v1	GSM1297182	GSM1297182	Tumor	ESCC	microarray	GSM1297182				6.63333333333333	1	GSE53625_clin.tsv				FALSE	TRUE	FALSE	pass
GEO_GSE53625_DEP_B02v1__GSM1297184	GEO_GSE53625_DEP_B02v1	GSM1297184	GSM1297184	Tumor	ESCC	microarray	GSM1297184				6.66666666666667	1	GSE53625_clin.tsv				FALSE	TRUE	FALSE	pass
GEO_GSE53625_DEP_B02v1__GSM1297186	GEO_GSE53625_DEP_B02v1	GSM1297186	GSM1297186	Tumor	ESCC	microarray	GSM1297186				56.2333333333333	1	GSE53625_clin.tsv				FALSE	TRUE	FALSE	pass
GEO_GSE53625_DEP_B02v1__GSM1297188	GEO_GSE53625_DEP_B02v1	GSM1297188	GSM1297188	Tumor	ESCC	microarray	GSM1297188				60.2	0	GSE53625_clin.tsv				FALSE	TRUE	FALSE	pass
GEO_GSE53625_DEP_B02v1__GSM1297190	GEO_GSE53625_DEP_B02v1	GSM1297190	GSM1297190	Tumor	ESCC	microarray	GSM1297190				47.1666666666667	1	GSE53625_clin.tsv				FALSE	TRUE	FALSE	pass
GEO_GSE53625_DEP_B02v1__GSM1297192	GEO_GSE53625_DEP_B02v1	GSM1297192	GSM1297192	Tumor	ESCC	microarray	GSM1297192				8.53333333333333	1	GSE53625_clin.tsv				FALSE	TRUE	FALSE	pass
GEO_GSE53625_DEP_B02v1__GSM1297194	GEO_GSE53625_DEP_B02v1	GSM1297194	GSM1297194	Tumor	ESCC	microarray	GSM1297194				13	1	GSE53625_clin.tsv				FALSE	TRUE	FALSE	pass
GEO_GSE53625_DEP_B02v1__GSM1297196	GEO_GSE53625_DEP_B02v1	GSM1297196	GSM1297196	Tumor	ESCC	microarray	GSM1297196				4.9	1	GSE53625_clin.tsv				FALSE	TRUE	FALSE	pass
GEO_GSE53625_DEP_B02v1__GSM1297198	GEO_GSE53625_DEP_B02v1	GSM1297198	GSM1297198	Tumor	ESCC	microarray	GSM1297198				32.2	1	GSE53625_clin.tsv				FALSE	TRUE	FALSE	pass
GEO_GSE53625_DEP_B02v1__GSM1297200	GEO_GSE53625_DEP_B02v1	GSM1297200	GSM1297200	Tumor	ESCC	microarray	GSM1297200				62.9333333333333	0	GSE53625_clin.tsv				FALSE	TRUE	FALSE	pass
GEO_GSE53625_DEP_B02v1__GSM1297202	GEO_GSE53625_DEP_B02v1	GSM1297202	GSM1297202	Tumor	ESCC	microarray	GSM1297202				62.9666666666667	0	GSE53625_clin.tsv				FALSE	TRUE	FALSE	pass
GEO_GSE53625_DEP_B02v1__GSM1297204	GEO_GSE53625_DEP_B02v1	GSM1297204	GSM1297204	Tumor	ESCC	microarray	GSM1297204				37.1666666666667	1	GSE53625_clin.tsv				FALSE	TRUE	FALSE	pass
GEO_GSE53625_DEP_B02v1__GSM1297206	GEO_GSE53625_DEP_B02v1	GSM1297206	GSM1297206	Tumor	ESCC	microarray	GSM1297206				62.4666666666667	0	GSE53625_clin.tsv				FALSE	TRUE	FALSE	pass
GEO_GSE53625_DEP_B02v1__GSM1297208	GEO_GSE53625_DEP_B02v1	GSM1297208	GSM1297208	Tumor	ESCC	microarray	GSM1297208				24.8	1	GSE53625_clin.tsv				FALSE	TRUE	FALSE	pass
GEO_GSE53625_DEP_B02v1__GSM1297210	GEO_GSE53625_DEP_B02v1	GSM1297210	GSM1297210	Tumor	ESCC	microarray	GSM1297210				62.4666666666667	0	GSE53625_clin.tsv				FALSE	TRUE	FALSE	pass
GEO_GSE53625_DEP_B02v1__GSM1297212	GEO_GSE53625_DEP_B02v1	GSM1297212	GSM1297212	Tumor	ESCC	microarray	GSM1297212				60.6333333333333	0	GSE53625_clin.tsv				FALSE	TRUE	FALSE	pass
GEO_GSE53625_DEP_B02v1__GSM1297214	GEO_GSE53625_DEP_B02v1	GSM1297214	GSM1297214	Tumor	ESCC	microarray	GSM1297214				19.2	1	GSE53625_clin.tsv				FALSE	TRUE	FALSE	pass
GEO_GSE53625_DEP_B02v1__GSM1297216	GEO_GSE53625_DEP_B02v1	GSM1297216	GSM1297216	Tumor	ESCC	microarray	GSM1297216				61.6	0	GSE53625_clin.tsv				FALSE	TRUE	FALSE	pass
GEO_GSE53625_DEP_B02v1__GSM1297218	GEO_GSE53625_DEP_B02v1	GSM1297218	GSM1297218	Tumor	ESCC	microarray	GSM1297218				64	0	GSE53625_clin.tsv				FALSE	TRUE	FALSE	pass
GEO_GSE53625_DEP_B02v1__GSM1297220	GEO_GSE53625_DEP_B02v1	GSM1297220	GSM1297220	Tumor	ESCC	microarray	GSM1297220				0.633333333333333	1	GSE53625_clin.tsv				FALSE	TRUE	FALSE	pass
GEO_GSE53625_DEP_B02v1__GSM1297222	GEO_GSE53625_DEP_B02v1	GSM1297222	GSM1297222	Tumor	ESCC	microarray	GSM1297222				63.4	0	GSE53625_clin.tsv				FALSE	TRUE	FALSE	pass
GEO_GSE53625_DEP_B02v1__GSM1297224	GEO_GSE53625_DEP_B02v1	GSM1297224	GSM1297224	Tumor	ESCC	microarray	GSM1297224				10.5666666666667	1	GSE53625_clin.tsv				FALSE	TRUE	FALSE	pass
GEO_GSE53625_DEP_B02v1__GSM1297226	GEO_GSE53625_DEP_B02v1	GSM1297226	GSM1297226	Tumor	ESCC	microarray	GSM1297226				5.06666666666667	1	GSE53625_clin.tsv				FALSE	TRUE	FALSE	pass
GEO_GSE53625_DEP_B02v1__GSM1297228	GEO_GSE53625_DEP_B02v1	GSM1297228	GSM1297228	Tumor	ESCC	microarray	GSM1297228				21.5333333333333	1	GSE53625_clin.tsv				FALSE	TRUE	FALSE	pass
GEO_GSE53625_DEP_B02v1__GSM1297230	GEO_GSE53625_DEP_B02v1	GSM1297230	GSM1297230	Tumor	ESCC	microarray	GSM1297230				21.9333333333333	1	GSE53625_clin.tsv				FALSE	TRUE	FALSE	pass
GEO_GSE53625_DEP_B02v1__GSM1297232	GEO_GSE53625_DEP_B02v1	GSM1297232	GSM1297232	Tumor	ESCC	microarray	GSM1297232				61.8333333333333	0	GSE53625_clin.tsv				FALSE	TRUE	FALSE	pass
GEO_GSE53625_DEP_B02v1__GSM1297234	GEO_GSE53625_DEP_B02v1	GSM1297234	GSM1297234	Tumor	ESCC	microarray	GSM1297234				60.7666666666667	0	GSE53625_clin.tsv				FALSE	TRUE	FALSE	pass
GEO_GSE53625_DEP_B02v1__GSM1297236	GEO_GSE53625_DEP_B02v1	GSM1297236	GSM1297236	Tumor	ESCC	microarray	GSM1297236				60.5	0	GSE53625_clin.tsv				FALSE	TRUE	FALSE	pass
GEO_GSE53625_DEP_B02v1__GSM1297238	GEO_GSE53625_DEP_B02v1	GSM1297238	GSM1297238	Tumor	ESCC	microarray	GSM1297238				72.5333333333333	0	GSE53625_clin.tsv				FALSE	TRUE	FALSE	pass
GEO_GSE53625_DEP_B02v1__GSM1297240	GEO_GSE53625_DEP_B02v1	GSM1297240	GSM1297240	Tumor	ESCC	microarray	GSM1297240				72.6333333333333	0	GSE53625_clin.tsv				FALSE	TRUE	FALSE	pass
GEO_GSE53625_DEP_B02v1__GSM1297242	GEO_GSE53625_DEP_B02v1	GSM1297242	GSM1297242	Tumor	ESCC	microarray	GSM1297242				35.0333333333333	1	GSE53625_clin.tsv				FALSE	TRUE	FALSE	pass
GEO_GSE53625_DEP_B02v1__GSM1297244	GEO_GSE53625_DEP_B02v1	GSM1297244	GSM1297244	Tumor	ESCC	microarray	GSM1297244				24.6666666666667	1	GSE53625_clin.tsv				FALSE	TRUE	FALSE	pass
GEO_GSE53625_DEP_B02v1__GSM1297246	GEO_GSE53625_DEP_B02v1	GSM1297246	GSM1297246	Tumor	ESCC	microarray	GSM1297246				59.1333333333333	1	GSE53625_clin.tsv				FALSE	TRUE	FALSE	pass
GEO_GSE53625_DEP_B02v1__GSM1297248	GEO_GSE53625_DEP_B02v1	GSM1297248	GSM1297248	Tumor	ESCC	microarray	GSM1297248				63.2666666666667	0	GSE53625_clin.tsv				FALSE	TRUE	FALSE	pass
GEO_GSE53625_DEP_B02v1__GSM1297250	GEO_GSE53625_DEP_B02v1	GSM1297250	GSM1297250	Tumor	ESCC	microarray	GSM1297250				8.36666666666667	1	GSE53625_clin.tsv				FALSE	TRUE	FALSE	pass
GEO_GSE53625_DEP_B02v1__GSM1297252	GEO_GSE53625_DEP_B02v1	GSM1297252	GSM1297252	Tumor	ESCC	microarray	GSM1297252				10.4666666666667	1	GSE53625_clin.tsv				FALSE	TRUE	FALSE	pass
GEO_GSE53625_DEP_B02v1__GSM1297254	GEO_GSE53625_DEP_B02v1	GSM1297254	GSM1297254	Tumor	ESCC	microarray	GSM1297254				63.0666666666667	1	GSE53625_clin.tsv				FALSE	TRUE	FALSE	pass
GEO_GSE53625_DEP_B02v1__GSM1297256	GEO_GSE53625_DEP_B02v1	GSM1297256	GSM1297256	Tumor	ESCC	microarray	GSM1297256				70.0666666666667	0	GSE53625_clin.tsv				FALSE	TRUE	FALSE	pass
GEO_GSE53625_DEP_B02v1__GSM1297258	GEO_GSE53625_DEP_B02v1	GSM1297258	GSM1297258	Tumor	ESCC	microarray	GSM1297258				72.1333333333333	0	GSE53625_clin.tsv				FALSE	TRUE	FALSE	pass
GEO_GSE53625_DEP_B02v1__GSM1297260	GEO_GSE53625_DEP_B02v1	GSM1297260	GSM1297260	Tumor	ESCC	microarray	GSM1297260				12	1	GSE53625_clin.tsv				FALSE	TRUE	FALSE	pass
GEO_GSE53625_DEP_B02v1__GSM1297262	GEO_GSE53625_DEP_B02v1	GSM1297262	GSM1297262	Tumor	ESCC	microarray	GSM1297262				69.6333333333333	0	GSE53625_clin.tsv				FALSE	TRUE	FALSE	pass
GEO_GSE53625_DEP_B02v1__GSM1297264	GEO_GSE53625_DEP_B02v1	GSM1297264	GSM1297264	Tumor	ESCC	microarray	GSM1297264				13	1	GSE53625_clin.tsv				FALSE	TRUE	FALSE	pass
GEO_GSE53625_DEP_B02v1__GSM1297266	GEO_GSE53625_DEP_B02v1	GSM1297266	GSM1297266	Tumor	ESCC	microarray	GSM1297266				68.7	0	GSE53625_clin.tsv				FALSE	TRUE	FALSE	pass
GEO_GSE53625_DEP_B02v1__GSM1297268	GEO_GSE53625_DEP_B02v1	GSM1297268	GSM1297268	Tumor	ESCC	microarray	GSM1297268				68.2	0	GSE53625_clin.tsv				FALSE	TRUE	FALSE	pass
GEO_GSE53625_DEP_B02v1__GSM1297270	GEO_GSE53625_DEP_B02v1	GSM1297270	GSM1297270	Tumor	ESCC	microarray	GSM1297270				68.6	0	GSE53625_clin.tsv				FALSE	TRUE	FALSE	pass
GEO_GSE53625_DEP_B02v1__GSM1297272	GEO_GSE53625_DEP_B02v1	GSM1297272	GSM1297272	Tumor	ESCC	microarray	GSM1297272				68	0	GSE53625_clin.tsv				FALSE	TRUE	FALSE	pass
GEO_GSE53625_DEP_B02v1__GSM1297274	GEO_GSE53625_DEP_B02v1	GSM1297274	GSM1297274	Tumor	ESCC	microarray	GSM1297274				68	0	GSE53625_clin.tsv				FALSE	TRUE	FALSE	pass
GEO_GSE53625_DEP_B02v1__GSM1297276	GEO_GSE53625_DEP_B02v1	GSM1297276	GSM1297276	Tumor	ESCC	microarray	GSM1297276				0.1	1	GSE53625_clin.tsv				FALSE	TRUE	FALSE	pass
GEO_GSE53625_DEP_B02v1__GSM1297278	GEO_GSE53625_DEP_B02v1	GSM1297278	GSM1297278	Tumor	ESCC	microarray	GSM1297278				19.2666666666667	1	GSE53625_clin.tsv				FALSE	TRUE	FALSE	pass
GEO_GSE53625_DEP_B02v1__GSM1297280	GEO_GSE53625_DEP_B02v1	GSM1297280	GSM1297280	Tumor	ESCC	microarray	GSM1297280				13.4666666666667	1	GSE53625_clin.tsv				FALSE	TRUE	FALSE	pass
GEO_GSE53625_DEP_B02v1__GSM1297282	GEO_GSE53625_DEP_B02v1	GSM1297282	GSM1297282	Tumor	ESCC	microarray	GSM1297282				65.8666666666667	0	GSE53625_clin.tsv				FALSE	TRUE	FALSE	pass
GEO_GSE53625_DEP_B02v1__GSM1297284	GEO_GSE53625_DEP_B02v1	GSM1297284	GSM1297284	Tumor	ESCC	microarray	GSM1297284				11.5	1	GSE53625_clin.tsv				FALSE	TRUE	FALSE	pass
GEO_GSE53625_DEP_B02v1__GSM1297286	GEO_GSE53625_DEP_B02v1	GSM1297286	GSM1297286	Tumor	ESCC	microarray	GSM1297286				17.4333333333333	1	GSE53625_clin.tsv				FALSE	TRUE	FALSE	pass
GEO_GSE53625_DEP_B02v1__GSM1297288	GEO_GSE53625_DEP_B02v1	GSM1297288	GSM1297288	Tumor	ESCC	microarray	GSM1297288				14.3666666666667	1	GSE53625_clin.tsv				FALSE	TRUE	FALSE	pass
GEO_GSE53625_DEP_B02v1__GSM1297290	GEO_GSE53625_DEP_B02v1	GSM1297290	GSM1297290	Tumor	ESCC	microarray	GSM1297290				65.1666666666667	0	GSE53625_clin.tsv				FALSE	TRUE	FALSE	pass
GEO_GSE53625_DEP_B02v1__GSM1297292	GEO_GSE53625_DEP_B02v1	GSM1297292	GSM1297292	Tumor	ESCC	microarray	GSM1297292				65.5	0	GSE53625_clin.tsv				FALSE	TRUE	FALSE	pass
GEO_GSE53625_DEP_B02v1__GSM1297294	GEO_GSE53625_DEP_B02v1	GSM1297294	GSM1297294	Tumor	ESCC	microarray	GSM1297294				64.1333333333333	0	GSE53625_clin.tsv				FALSE	TRUE	FALSE	pass
GEO_GSE53625_DEP_B02v1__GSM1297296	GEO_GSE53625_DEP_B02v1	GSM1297296	GSM1297296	Tumor	ESCC	microarray	GSM1297296				26.5	1	GSE53625_clin.tsv				FALSE	TRUE	FALSE	pass
GEO_GSE53625_DEP_B02v1__GSM1297298	GEO_GSE53625_DEP_B02v1	GSM1297298	GSM1297298	Tumor	ESCC	microarray	GSM1297298				65.2666666666667	0	GSE53625_clin.tsv				FALSE	TRUE	FALSE	pass
GEO_GSE53625_DEP_B02v1__GSM1297300	GEO_GSE53625_DEP_B02v1	GSM1297300	GSM1297300	Tumor	ESCC	microarray	GSM1297300				48.7666666666667	1	GSE53625_clin.tsv				FALSE	TRUE	FALSE	pass
GEO_GSE53625_DEP_B02v1__GSM1297302	GEO_GSE53625_DEP_B02v1	GSM1297302	GSM1297302	Tumor	ESCC	microarray	GSM1297302				9.76666666666667	1	GSE53625_clin.tsv				FALSE	TRUE	FALSE	pass
GEO_GSE53625_DEP_B02v1__GSM1297304	GEO_GSE53625_DEP_B02v1	GSM1297304	GSM1297304	Tumor	ESCC	microarray	GSM1297304				5.83333333333333	1	GSE53625_clin.tsv				FALSE	TRUE	FALSE	pass
GEO_GSE53625_DEP_B02v1__GSM1297306	GEO_GSE53625_DEP_B02v1	GSM1297306	GSM1297306	Tumor	ESCC	microarray	GSM1297306				4.2	1	GSE53625_clin.tsv				FALSE	TRUE	FALSE	pass
GEO_GSE53625_DEP_B02v1__GSM1297308	GEO_GSE53625_DEP_B02v1	GSM1297308	GSM1297308	Tumor	ESCC	microarray	GSM1297308				25.1666666666667	1	GSE53625_clin.tsv				FALSE	TRUE	FALSE	pass
GEO_GSE53625_DEP_B02v1__GSM1297310	GEO_GSE53625_DEP_B02v1	GSM1297310	GSM1297310	Tumor	ESCC	microarray	GSM1297310				63.5333333333333	0	GSE53625_clin.tsv				FALSE	TRUE	FALSE	pass
GEO_GSE53625_DEP_B02v1__GSM1297312	GEO_GSE53625_DEP_B02v1	GSM1297312	GSM1297312	Tumor	ESCC	microarray	GSM1297312				62.8666666666667	0	GSE53625_clin.tsv				FALSE	TRUE	FALSE	pass
modality_manifest_frozen_v1.tsv
modality_id	cohort_id	omics_type	raw_input_path	feature_id_type_raw	sample_id_type_raw	sample_unit_final	orientation	pathway_projection_status	freeze_status
TCGA_ESCA_ESCC_FC_B02v1_RNA	TCGA_ESCA_ESCC_FC_B02v1	RNA	G:\vscode\newproject\escc\StageB_R\out_escc_only\aligned\aligned_Expr.tsv	gene_or_feature_symbol	TCGA_sample_barcode	patient	features_by_samples	pending_C_stage	frozen_input
TCGA_ESCA_ESCC_FC_B02v1_CNV	TCGA_ESCA_ESCC_FC_B02v1	CNV	G:\vscode\newproject\escc\StageB_R\out_escc_only\aligned\aligned_CNV.tsv	gene_or_feature_symbol	TCGA_sample_barcode	patient	features_by_samples	pending_C_stage	frozen_input
TCGA_ESCA_ESCC_FC_B02v1_METH	TCGA_ESCA_ESCC_FC_B02v1	METH	G:\vscode\newproject\escc\2Epigenomics\methylation_beta.tsv	CpG_probe	matrix_file_uuid_mapped_to_TCGA_barcode	patient	features_by_samples	pending_C_stage	frozen_input
GEO_GSE53625_DEP_B02v1_RNA	GEO_GSE53625_DEP_B02v1	RNA_external	G:\vscode\newproject\escc\GSE53625_tumor_expr_by_GeneSymbol.tsv	GeneSymbol	GSM_accession	sample	features_by_samples	pending_C_stage	frozen_input
B02_06_data_freeze_qc.tsv
metric	value
tcga_fusion_core_final_n	92
tcga_fusion_core_deaths	31
tcga_fusion_core_censored	61
tcga_survival_source_counts	{'local_clinical_tsv': 88, 'GDC_cases_API_recovery': 4}
gse53625_expr_samples	179
gse53625_clin_samples	179
gse53625_expr_clin_overlap	179
gse53625_deaths	106
gse53625_censored	73
cohort_manifest	G:\vscode\newproject\escc\PAST_Fusion\metadata\cohort_manifest_frozen_v1.tsv
sample_manifest	G:\vscode\newproject\escc\PAST_Fusion\metadata\sample_manifest_frozen_v1.tsv
modality_manifest	G:\vscode\newproject\escc\PAST_Fusion\metadata\modality_manifest_frozen_v1.tsv
final_tcga_core_copy	G:\vscode\newproject\escc\PAST_Fusion\metadata\tcga_fusion_core_final_B02_v1.tsv
data_freeze_log_B02_v1.md
# B02 Data Freeze Log v1
## Freeze version
B02_v1
## Date
Generated by B02_06_freeze_analysis_cohorts.py
## Main fusion core cohort
TCGA-ESCA ESCC fusion core cohort was frozen as:
- Matched RNA + CNV + primary tumor methylation
- Valid overall survival
- Patient-level unit
- Final n = 92
- Death events = 31
- Censored = 61
Survival information sources:
{'local_clinical_tsv': 88, 'GDC_cases_API_recovery': 4}
## Deployment cohort
GSE53625 transcriptome-only deployment cohort:
- Expression samples = 179
- Clinical samples = 179
- Expression-clinical overlap = 179
- Death events = 106
- Censored = 73
## Hard prohibitions
1. No feature selection using GSE53625.
2. No hyperparameter tuning using GSE53625.
3. No optimal cutpoint search in GSE53625 as a primary result.
4. No double-counting GSE53625 with GSE53624/GSE53622.
5. No clinical utility claim from this dataset alone.
6. GSE160269 and ESCCdb can only be used as orthogonal biological support.
## Next stage
C01 should construct a unified pathway/program feature space for RNA, CNV, methylation, and GSE53625 transcriptome deployment.

## Sheet: S2_Pathway_QC
Supplementary Data S2. Pathway set and pathway-level feature construction QC
pathway_sets.yaml
﻿project:
name: "PAST-Fusion_ESCC"
stage: "C01-00"
purpose: "Freeze pathway gene sets for pathway-anchored multi-omics feature construction"
pathway_sources:
species: "Homo sapiens"
databases:
- name: "MSigDB_Hallmark"
collection: "H"
subcollection: ""
use: true
- name: "MSigDB_Reactome"
collection: "C2"
subcollection: "CP:REACTOME"
use: true
filtering:
min_genes_per_set: 10
max_genes_per_set: 300
remove_duplicate_gene_symbols: true
uppercase_gene_symbols: true
outputs:
raw_dir: "G:/vscode/newproject/escc/PAST_Fusion/data/raw/pathways"
processed_dir: "G:/vscode/newproject/escc/PAST_Fusion/data/processed/pathway_sets"
qc_dir: "G:/vscode/newproject/escc/PAST_Fusion/results/qc"
log_dir: "G:/vscode/newproject/escc/PAST_Fusion/results/logs"
hard_rules:
- "Only Hallmark and Reactome are used in C01-00."
- "GO, KEGG, immune signatures and tumor-specific signatures are not included in C01-00."
- "Pathway sets are frozen before model training."
- "External deployment cohort must not be used for feature selection."
C01_pathway_set_qc.tsv
metric	value
stage	C01-00
species	Homo sapiens
min_genes_per_set	10
max_genes_per_set	300
n_hallmark_sets_raw	50
n_reactome_sets_raw	1787
n_total_sets_raw	1837
n_total_sets_after_size_filter	1433
n_hallmark_sets_after_filter	50
n_reactome_sets_after_filter	1383
n_unique_genes_after_filter	11242
out_long	G:/vscode/newproject/escc/PAST_Fusion/data/processed/pathway_sets/pathway_gene_sets_long_B02v1.tsv
out_gmt	G:/vscode/newproject/escc/PAST_Fusion/data/processed/pathway_sets/pathway_gene_sets_filtered_B02v1.gmt
out_detail	G:/vscode/newproject/escc/PAST_Fusion/results/qc/C01_00_pathway_set_detail.tsv
raw_msig_file	G:/vscode/newproject/escc/PAST_Fusion/data/raw/pathways/msigdbr_human_all_queried.tsv
raw_hallmark_file	G:/vscode/newproject/escc/PAST_Fusion/data/raw/pathways/msigdb_hallmark_human_raw.tsv
raw_reactome_file	G:/vscode/newproject/escc/PAST_Fusion/data/raw/pathways/msigdb_reactome_human_raw.tsv
C01_00_pathway_set_detail.tsv
pathway_source	collection	subcollection	pathway_name	n_genes
MSigDB_Hallmark	H		HALLMARK_ADIPOGENESIS	200
MSigDB_Hallmark	H		HALLMARK_ALLOGRAFT_REJECTION	200
MSigDB_Hallmark	H		HALLMARK_ANDROGEN_RESPONSE	101
MSigDB_Hallmark	H		HALLMARK_ANGIOGENESIS	36
MSigDB_Hallmark	H		HALLMARK_APICAL_JUNCTION	200
MSigDB_Hallmark	H		HALLMARK_APICAL_SURFACE	44
MSigDB_Hallmark	H		HALLMARK_APOPTOSIS	161
MSigDB_Hallmark	H		HALLMARK_BILE_ACID_METABOLISM	112
MSigDB_Hallmark	H		HALLMARK_CHOLESTEROL_HOMEOSTASIS	74
MSigDB_Hallmark	H		HALLMARK_COAGULATION	138
MSigDB_Hallmark	H		HALLMARK_COMPLEMENT	200
MSigDB_Hallmark	H		HALLMARK_DNA_REPAIR	150
MSigDB_Hallmark	H		HALLMARK_E2F_TARGETS	200
MSigDB_Hallmark	H		HALLMARK_EPITHELIAL_MESENCHYMAL_TRANSITION	200
MSigDB_Hallmark	H		HALLMARK_ESTROGEN_RESPONSE_EARLY	200
MSigDB_Hallmark	H		HALLMARK_ESTROGEN_RESPONSE_LATE	200
MSigDB_Hallmark	H		HALLMARK_FATTY_ACID_METABOLISM	158
MSigDB_Hallmark	H		HALLMARK_G2M_CHECKPOINT	200
MSigDB_Hallmark	H		HALLMARK_GLYCOLYSIS	200
MSigDB_Hallmark	H		HALLMARK_HEDGEHOG_SIGNALING	36
MSigDB_Hallmark	H		HALLMARK_HEME_METABOLISM	200
MSigDB_Hallmark	H		HALLMARK_HYPOXIA	200
MSigDB_Hallmark	H		HALLMARK_IL2_STAT5_SIGNALING	199
MSigDB_Hallmark	H		HALLMARK_IL6_JAK_STAT3_SIGNALING	87
MSigDB_Hallmark	H		HALLMARK_INFLAMMATORY_RESPONSE	200
MSigDB_Hallmark	H		HALLMARK_INTERFERON_ALPHA_RESPONSE	97
MSigDB_Hallmark	H		HALLMARK_INTERFERON_GAMMA_RESPONSE	200
MSigDB_Hallmark	H		HALLMARK_KRAS_SIGNALING_DN	200
MSigDB_Hallmark	H		HALLMARK_KRAS_SIGNALING_UP	200
MSigDB_Hallmark	H		HALLMARK_MITOTIC_SPINDLE	199
MSigDB_Hallmark	H		HALLMARK_MTORC1_SIGNALING	200
MSigDB_Hallmark	H		HALLMARK_MYC_TARGETS_V1	200
MSigDB_Hallmark	H		HALLMARK_MYC_TARGETS_V2	58
MSigDB_Hallmark	H		HALLMARK_MYOGENESIS	200
MSigDB_Hallmark	H		HALLMARK_NOTCH_SIGNALING	32
MSigDB_Hallmark	H		HALLMARK_OXIDATIVE_PHOSPHORYLATION	200
MSigDB_Hallmark	H		HALLMARK_P53_PATHWAY	200
MSigDB_Hallmark	H		HALLMARK_PANCREAS_BETA_CELLS	40
MSigDB_Hallmark	H		HALLMARK_PEROXISOME	104
MSigDB_Hallmark	H		HALLMARK_PI3K_AKT_MTOR_SIGNALING	105
MSigDB_Hallmark	H		HALLMARK_PROTEIN_SECRETION	96
MSigDB_Hallmark	H		HALLMARK_REACTIVE_OXYGEN_SPECIES_PATHWAY	49
MSigDB_Hallmark	H		HALLMARK_SPERMATOGENESIS	135
MSigDB_Hallmark	H		HALLMARK_TGF_BETA_SIGNALING	54
MSigDB_Hallmark	H		HALLMARK_TNFA_SIGNALING_VIA_NFKB	200
MSigDB_Hallmark	H		HALLMARK_UNFOLDED_PROTEIN_RESPONSE	113
MSigDB_Hallmark	H		HALLMARK_UV_RESPONSE_DN	144
MSigDB_Hallmark	H		HALLMARK_UV_RESPONSE_UP	158
MSigDB_Hallmark	H		HALLMARK_WNT_BETA_CATENIN_SIGNALING	42
MSigDB_Hallmark	H		HALLMARK_XENOBIOTIC_METABOLISM	200
MSigDB_Reactome	C2	CP:REACTOME	REACTOME_ABC_FAMILY_PROTEINS_MEDIATED_TRANSPORT	90
MSigDB_Reactome	C2	CP:REACTOME	REACTOME_ABC_TRANSPORTERS_IN_LIPID_HOMEOSTASIS	18
MSigDB_Reactome	C2	CP:REACTOME	REACTOME_ABC_TRANSPORTER_DISORDERS	65
MSigDB_Reactome	C2	CP:REACTOME	REACTOME_ABERRANT_REGULATION_OF_MITOTIC_EXIT_IN_CANCER_DUE_TO_RB1_DEFECTS	20
MSigDB_Reactome	C2	CP:REACTOME	REACTOME_ABERRANT_REGULATION_OF_MITOTIC_G1_S_TRANSITION_IN_CANCER_DUE_TO_RB1_DEFECTS	17
MSigDB_Reactome	C2	CP:REACTOME	REACTOME_ABORTIVE_ELONGATION_OF_HIV_1_TRANSCRIPT_IN_THE_ABSENCE_OF_TAT	23
MSigDB_Reactome	C2	CP:REACTOME	REACTOME_ACETYLCHOLINE_BINDING_AND_DOWNSTREAM_EVENTS	14
MSigDB_Reactome	C2	CP:REACTOME	REACTOME_ACETYLCHOLINE_NEUROTRANSMITTER_RELEASE_CYCLE	17
MSigDB_Reactome	C2	CP:REACTOME	REACTOME_ACETYLCHOLINE_REGULATES_INSULIN_SECRETION	10
MSigDB_Reactome	C2	CP:REACTOME	REACTOME_ACTIVATED_NOTCH1_TRANSMITS_SIGNAL_TO_THE_NUCLEUS	31
MSigDB_Reactome	C2	CP:REACTOME	REACTOME_ACTIVATED_NTRK2_SIGNALS_THROUGH_FRS2_AND_FRS3	11
MSigDB_Reactome	C2	CP:REACTOME	REACTOME_ACTIVATED_PKN1_STIMULATES_TRANSCRIPTION_OF_AR_ANDROGEN_RECEPTOR_REGULATED_GENES_KLK2_AND_KLK3	66
MSigDB_Reactome	C2	CP:REACTOME	REACTOME_ACTIVATED_TAK1_MEDIATES_P38_MAPK_ACTIVATION	23
MSigDB_Reactome	C2	CP:REACTOME	REACTOME_ACTIVATION_OF_AMPK_DOWNSTREAM_OF_NMDARS	29
MSigDB_Reactome	C2	CP:REACTOME	REACTOME_ACTIVATION_OF_ANTERIOR_HOX_GENES_IN_HINDBRAIN_DEVELOPMENT_DURING_EARLY_EMBRYOGENESIS	122
MSigDB_Reactome	C2	CP:REACTOME	REACTOME_ACTIVATION_OF_APC_C_AND_APC_C_CDC20_MEDIATED_DEGRADATION_OF_MITOTIC_PROTEINS	64
MSigDB_Reactome	C2	CP:REACTOME	REACTOME_ACTIVATION_OF_ATR_IN_RESPONSE_TO_REPLICATION_STRESS	37
MSigDB_Reactome	C2	CP:REACTOME	REACTOME_ACTIVATION_OF_BAD_AND_TRANSLOCATION_TO_MITOCHONDRIA	15
MSigDB_Reactome	C2	CP:REACTOME	REACTOME_ACTIVATION_OF_BH3_ONLY_PROTEINS	30
MSigDB_Reactome	C2	CP:REACTOME	REACTOME_ACTIVATION_OF_GENE_EXPRESSION_BY_SREBF_SREBP	42
MSigDB_Reactome	C2	CP:REACTOME	REACTOME_ACTIVATION_OF_IRF3_IRF7_MEDIATED_BY_TBK1_IKK_IKBKE	18
MSigDB_Reactome	C2	CP:REACTOME	REACTOME_ACTIVATION_OF_KAINATE_RECEPTORS_UPON_GLUTAMATE_BINDING	30
MSigDB_Reactome	C2	CP:REACTOME	REACTOME_ACTIVATION_OF_MATRIX_METALLOPROTEINASES	33
MSigDB_Reactome	C2	CP:REACTOME	REACTOME_ACTIVATION_OF_NF_KAPPAB_IN_B_CELLS	54
MSigDB_Reactome	C2	CP:REACTOME	REACTOME_ACTIVATION_OF_NMDA_RECEPTORS_AND_POSTSYNAPTIC_EVENTS	94
MSigDB_Reactome	C2	CP:REACTOME	REACTOME_ACTIVATION_OF_PPARGC1A_PGC_1ALPHA_BY_PHOSPHORYLATION	10
MSigDB_Reactome	C2	CP:REACTOME	REACTOME_ACTIVATION_OF_RAC1	13
MSigDB_Reactome	C2	CP:REACTOME	REACTOME_ACTIVATION_OF_SMO	18
MSigDB_Reactome	C2	CP:REACTOME	REACTOME_ACTIVATION_OF_THE_AP_1_FAMILY_OF_TRANSCRIPTION_FACTORS	10
MSigDB_Reactome	C2	CP:REACTOME	REACTOME_ACTIVATION_OF_THE_MRNA_UPON_BINDING_OF_THE_CAP_BINDING_COMPLEX_AND_EIFS_AND_SUBSEQUENT_BINDING_TO_43S	60
MSigDB_Reactome	C2	CP:REACTOME	REACTOME_ACTIVATION_OF_THE_PHOTOTRANSDUCTION_CASCADE	11
MSigDB_Reactome	C2	CP:REACTOME	REACTOME_ACTIVATION_OF_THE_PRE_REPLICATIVE_COMPLEX	33
MSigDB_Reactome	C2	CP:REACTOME	REACTOME_ACTIVATION_OF_THE_TFAP2_AP_2_FAMILY_OF_TRANSCRIPTION_FACTORS	12
MSigDB_Reactome	C2	CP:REACTOME	REACTOME_ACYL_CHAIN_REMODELLING_OF_PC	27
MSigDB_Reactome	C2	CP:REACTOME	REACTOME_ACYL_CHAIN_REMODELLING_OF_PE	29
MSigDB_Reactome	C2	CP:REACTOME	REACTOME_ACYL_CHAIN_REMODELLING_OF_PG	18
MSigDB_Reactome	C2	CP:REACTOME	REACTOME_ACYL_CHAIN_REMODELLING_OF_PI	17
MSigDB_Reactome	C2	CP:REACTOME	REACTOME_ACYL_CHAIN_REMODELLING_OF_PS	22
MSigDB_Reactome	C2	CP:REACTOME	REACTOME_ADENYLATE_CYCLASE_ACTIVATING_PATHWAY	10
MSigDB_Reactome	C2	CP:REACTOME	REACTOME_ADENYLATE_CYCLASE_INHIBITORY_PATHWAY	14
MSigDB_Reactome	C2	CP:REACTOME	REACTOME_ADHERENS_JUNCTIONS_INTERACTIONS	58
MSigDB_Reactome	C2	CP:REACTOME	REACTOME_ADIPOGENESIS	110
MSigDB_Reactome	C2	CP:REACTOME	REACTOME_ADORA2B_MEDIATED_ANTI_INFLAMMATORY_CYTOKINES_PRODUCTION	43
MSigDB_Reactome	C2	CP:REACTOME	REACTOME_ADP_SIGNALLING_THROUGH_P2Y_PURINOCEPTOR_1	25
MSigDB_Reactome	C2	CP:REACTOME	REACTOME_ADP_SIGNALLING_THROUGH_P2Y_PURINOCEPTOR_12	22
MSigDB_Reactome	C2	CP:REACTOME	REACTOME_ADRENALINE_NORADRENALINE_INHIBITS_INSULIN_SECRETION	28
MSigDB_Reactome	C2	CP:REACTOME	REACTOME_ADVANCED_GLYCOSYLATION_ENDPRODUCT_RECEPTOR_SIGNALING	13
MSigDB_Reactome	C2	CP:REACTOME	REACTOME_AEROBIC_RESPIRATION_AND_RESPIRATORY_ELECTRON_TRANSPORT	261
MSigDB_Reactome	C2	CP:REACTOME	REACTOME_AFLATOXIN_ACTIVATION_AND_DETOXIFICATION	18
MSigDB_Reactome	C2	CP:REACTOME	REACTOME_AGGREPHAGY	44
MSigDB_Reactome	C2	CP:REACTOME	REACTOME_AKT_PHOSPHORYLATES_TARGETS_IN_THE_CYTOSOL	14
MSigDB_Reactome	C2	CP:REACTOME	REACTOME_AKT_PHOSPHORYLATES_TARGETS_IN_THE_NUCLEUS	10
MSigDB_Reactome	C2	CP:REACTOME	REACTOME_ALK_MUTANTS_BIND_TKIS	12
MSigDB_Reactome	C2	CP:REACTOME	REACTOME_ALPHA_DEFENSINS	10
MSigDB_Reactome	C2	CP:REACTOME	REACTOME_ALPHA_LINOLENIC_OMEGA3_AND_LINOLEIC_OMEGA6_ACID_METABOLISM	13
MSigDB_Reactome	C2	CP:REACTOME	REACTOME_ALPHA_PROTEIN_KINASE_1_SIGNALING_PATHWAY	11
MSigDB_Reactome	C2	CP:REACTOME	REACTOME_AMINE_LIGAND_BINDING_RECEPTORS	42
MSigDB_Reactome	C2	CP:REACTOME	REACTOME_AMINO_ACIDS_REGULATE_MTORC1	55
MSigDB_Reactome	C2	CP:REACTOME	REACTOME_AMINO_ACID_TRANSPORT_ACROSS_THE_PLASMA_MEMBRANE	33
MSigDB_Reactome	C2	CP:REACTOME	REACTOME_AMYLOID_FIBER_FORMATION	110
MSigDB_Reactome	C2	CP:REACTOME	REACTOME_ANCHORING_FIBRIL_FORMATION	15
MSigDB_Reactome	C2	CP:REACTOME	REACTOME_ANCHORING_OF_THE_BASAL_BODY_TO_THE_PLASMA_MEMBRANE	97
MSigDB_Reactome	C2	CP:REACTOME	REACTOME_ANDROGEN_BIOSYNTHESIS	11
MSigDB_Reactome	C2	CP:REACTOME	REACTOME_ANTIGEN_ACTIVATES_B_CELL_RECEPTOR_BCR_LEADING_TO_GENERATION_OF_SECOND_MESSENGERS	86
MSigDB_Reactome	C2	CP:REACTOME	REACTOME_ANTIGEN_PRESENTATION_FOLDING_ASSEMBLY_AND_PEPTIDE_LOADING_OF_CLASS_I_MHC	29
MSigDB_Reactome	C2	CP:REACTOME	REACTOME_ANTIGEN_PROCESSING_CROSS_PRESENTATION	98
MSigDB_Reactome	C2	CP:REACTOME	REACTOME_ANTIGEN_PROCESSING_UBIQUITINATION_PROTEASOME_DEGRADATION	295
MSigDB_Reactome	C2	CP:REACTOME	REACTOME_ANTIGEN_PROCESSING_UB_ATP_INDEPENDENT_PROTEASOMAL_DEGRADATION	19
MSigDB_Reactome	C2	CP:REACTOME	REACTOME_ANTIMICROBIAL_PEPTIDES	98
MSigDB_Reactome	C2	CP:REACTOME	REACTOME_ANTIVIRAL_MECHANISM_BY_IFN_STIMULATED_GENES	151
MSigDB_Reactome	C2	CP:REACTOME	REACTOME_ANTI_INFLAMMATORY_RESPONSE_FAVOURING_LEISHMANIA_PARASITE_INFECTION	133
MSigDB_Reactome	C2	CP:REACTOME	REACTOME_APC_CDC20_MEDIATED_DEGRADATION_OF_NEK2A	26
MSigDB_Reactome	C2	CP:REACTOME	REACTOME_APC_C_CDC20_MEDIATED_DEGRADATION_OF_CYCLIN_B	24
MSigDB_Reactome	C2	CP:REACTOME	REACTOME_APC_C_CDH1_MEDIATED_DEGRADATION_OF_CDC20_AND_OTHER_APC_C_CDH1_TARGETED_PROTEINS_IN_LATE_MITOSIS_EARLY_G1	61
MSigDB_Reactome	C2	CP:REACTOME	REACTOME_APC_C_MEDIATED_DEGRADATION_OF_CELL_CYCLE_PROTEINS	75
MSigDB_Reactome	C2	CP:REACTOME	REACTOME_APOPTOSIS	166
MSigDB_Reactome	C2	CP:REACTOME	REACTOME_APOPTOSIS_INDUCED_DNA_FRAGMENTATION	13
MSigDB_Reactome	C2	CP:REACTOME	REACTOME_APOPTOTIC_CLEAVAGE_OF_CELLULAR_PROTEINS	38
MSigDB_Reactome	C2	CP:REACTOME	REACTOME_APOPTOTIC_CLEAVAGE_OF_CELL_ADHESION_PROTEINS	11
MSigDB_Reactome	C2	CP:REACTOME	REACTOME_APOPTOTIC_EXECUTION_PHASE	52
MSigDB_Reactome	C2	CP:REACTOME	REACTOME_APOPTOTIC_FACTOR_MEDIATED_RESPONSE	20
MSigDB_Reactome	C2	CP:REACTOME	REACTOME_AQUAPORIN_MEDIATED_TRANSPORT	52
MSigDB_Reactome	C2	CP:REACTOME	REACTOME_ARACHIDONATE_METABOLISM	59
MSigDB_Reactome	C2	CP:REACTOME	REACTOME_ASPARTATE_AND_ASPARAGINE_METABOLISM	11
MSigDB_Reactome	C2	CP:REACTOME	REACTOME_ASPIRIN_ADME	44
MSigDB_Reactome	C2	CP:REACTOME	REACTOME_ASSEMBLY_AND_CELL_SURFACE_PRESENTATION_OF_NMDA_RECEPTORS	44
MSigDB_Reactome	C2	CP:REACTOME	REACTOME_ASSEMBLY_OF_ACTIVE_LPL_AND_LIPC_LIPASE_COMPLEXES	19
MSigDB_Reactome	C2	CP:REACTOME	REACTOME_ASSEMBLY_OF_COLLAGEN_FIBRILS_AND_OTHER_MULTIMERIC_STRUCTURES	61
MSigDB_Reactome	C2	CP:REACTOME	REACTOME_ASSEMBLY_OF_THE_HIV_VIRION	16
MSigDB_Reactome	C2	CP:REACTOME	REACTOME_ASSEMBLY_OF_THE_ORC_COMPLEX_AT_THE_ORIGIN_OF_REPLICATION	68
MSigDB_Reactome	C2	CP:REACTOME	REACTOME_ASSOCIATION_OF_TRIC_CCT_WITH_TARGET_PROTEINS_DURING_BIOSYNTHESIS	39
MSigDB_Reactome	C2	CP:REACTOME	REACTOME_ASYMMETRIC_LOCALIZATION_OF_PCP_PROTEINS	51
MSigDB_Reactome	C2	CP:REACTOME	REACTOME_ATF4_ACTIVATES_GENES_IN_RESPONSE_TO_ENDOPLASMIC_RETICULUM_STRESS	27
MSigDB_Reactome	C2	CP:REACTOME	REACTOME_ATF6_ATF6_ALPHA_ACTIVATES_CHAPERONES	12
MSigDB_Reactome	C2	CP:REACTOME	REACTOME_ATF6_ATF6_ALPHA_ACTIVATES_CHAPERONE_GENES	10
MSigDB_Reactome	C2	CP:REACTOME	REACTOME_ATP_DEPENDENT_CHROMATIN_REMODELERS	31
MSigDB_Reactome	C2	CP:REACTOME	REACTOME_ATTACHMENT_AND_ENTRY	19
MSigDB_Reactome	C2	CP:REACTOME	REACTOME_ATTENUATION_PHASE	28
MSigDB_Reactome	C2	CP:REACTOME	REACTOME_AUF1_HNRNP_D0_BINDS_AND_DESTABILIZES_MRNA	42
MSigDB_Reactome	C2	CP:REACTOME	REACTOME_AURKA_ACTIVATION_BY_TPX2	72
MSigDB_Reactome	C2	CP:REACTOME	REACTOME_AUTOPHAGY	159
MSigDB_Reactome	C2	CP:REACTOME	REACTOME_AZATHIOPRINE_ADME	23
MSigDB_Reactome	C2	CP:REACTOME	REACTOME_A_TETRASACCHARIDE_LINKER_SEQUENCE_IS_REQUIRED_FOR_GAG_SYNTHESIS	27
MSigDB_Reactome	C2	CP:REACTOME	REACTOME_BACTERIAL_INFECTION_PATHWAYS	71
MSigDB_Reactome	C2	CP:REACTOME	REACTOME_BASE_EXCISION_REPAIR	90
MSigDB_Reactome	C2	CP:REACTOME	REACTOME_BASE_EXCISION_REPAIR_AP_SITE_FORMATION	62
MSigDB_Reactome	C2	CP:REACTOME	REACTOME_BASIGIN_INTERACTIONS	25
MSigDB_Reactome	C2	CP:REACTOME	REACTOME_BBSOME_MEDIATED_CARGO_TARGETING_TO_CILIUM	23
MSigDB_Reactome	C2	CP:REACTOME	REACTOME_BETA_CATENIN_INDEPENDENT_WNT_SIGNALING	133
MSigDB_Reactome	C2	CP:REACTOME	REACTOME_BETA_CATENIN_PHOSPHORYLATION_CASCADE	17
MSigDB_Reactome	C2	CP:REACTOME	REACTOME_BETA_DEFENSINS	43
MSigDB_Reactome	C2	CP:REACTOME	REACTOME_BETA_OXIDATION_OF_VERY_LONG_CHAIN_FATTY_ACIDS	11
MSigDB_Reactome	C2	CP:REACTOME	REACTOME_BICARBONATE_TRANSPORTERS	10
MSigDB_Reactome	C2	CP:REACTOME	REACTOME_BILE_ACID_AND_BILE_SALT_METABOLISM	44
MSigDB_Reactome	C2	CP:REACTOME	REACTOME_BINDING_AND_UPTAKE_OF_LIGANDS_BY_SCAVENGER_RECEPTORS	98
MSigDB_Reactome	C2	CP:REACTOME	REACTOME_BIOLOGICAL_OXIDATIONS	221
MSigDB_Reactome	C2	CP:REACTOME	REACTOME_BIOSYNTHESIS_OF_SPECIALIZED_PRORESOLVING_MEDIATORS_SPMS	19
MSigDB_Reactome	C2	CP:REACTOME	REACTOME_BIOSYNTHESIS_OF_THE_N_GLYCAN_PRECURSOR_DOLICHOL_LIPID_LINKED_OLIGOSACCHARIDE_LLO_AND_TRANSFER_TO_A_NASCENT_PROTEIN	80
MSigDB_Reactome	C2	CP:REACTOME	REACTOME_BIOTIN_TRANSPORT_AND_METABOLISM	11
MSigDB_Reactome	C2	CP:REACTOME	REACTOME_BLOOD_GROUP_SYSTEMS_BIOSYNTHESIS	19
MSigDB_Reactome	C2	CP:REACTOME	REACTOME_BMAL1_CLOCK_NPAS2_ACTIVATES_CIRCADIAN_EXPRESSION	26
MSigDB_Reactome	C2	CP:REACTOME	REACTOME_BRANCHED_CHAIN_AMINO_ACID_CATABOLISM	21
MSigDB_Reactome	C2	CP:REACTOME	REACTOME_BUDDING_AND_MATURATION_OF_HIV_VIRION	28
MSigDB_Reactome	C2	CP:REACTOME	REACTOME_BUTYRATE_RESPONSE_FACTOR_1_BRF1_BINDS_AND_DESTABILIZES_MRNA	17
MSigDB_Reactome	C2	CP:REACTOME	REACTOME_BUTYROPHILIN_BTN_FAMILY_INTERACTIONS	12
MSigDB_Reactome	C2	CP:REACTOME	REACTOME_B_WICH_COMPLEX_POSITIVELY_REGULATES_RRNA_EXPRESSION	90
MSigDB_Reactome	C2	CP:REACTOME	REACTOME_CA2_PATHWAY	62
MSigDB_Reactome	C2	CP:REACTOME	REACTOME_CALCITONIN_LIKE_LIGAND_RECEPTORS	10
MSigDB_Reactome	C2	CP:REACTOME	REACTOME_CALNEXIN_CALRETICULIN_CYCLE	26
MSigDB_Reactome	C2	CP:REACTOME	REACTOME_CAMK_IV_MEDIATED_PHOSPHORYLATION_OF_CREB	10
MSigDB_Reactome	C2	CP:REACTOME	REACTOME_CARBOXYTERMINAL_POST_TRANSLATIONAL_MODIFICATIONS_OF_TUBULIN	46
MSigDB_Reactome	C2	CP:REACTOME	REACTOME_CARDIAC_CONDUCTION	130
MSigDB_Reactome	C2	CP:REACTOME	REACTOME_CARDIOGENESIS	27
MSigDB_Reactome	C2	CP:REACTOME	REACTOME_CARGO_CONCENTRATION_IN_THE_ER	33
MSigDB_Reactome	C2	CP:REACTOME	REACTOME_CARGO_RECOGNITION_FOR_CLATHRIN_MEDIATED_ENDOCYTOSIS	105
MSigDB_Reactome	C2	CP:REACTOME	REACTOME_CARGO_TRAFFICKING_TO_THE_PERICILIARY_MEMBRANE	51
MSigDB_Reactome	C2	CP:REACTOME	REACTOME_CARNITINE_SHUTTLE	14
MSigDB_Reactome	C2	CP:REACTOME	REACTOME_CASPASE_ACTIVATION_VIA_DEATH_RECEPTORS_IN_THE_PRESENCE_OF_LIGAND	16
MSigDB_Reactome	C2	CP:REACTOME	REACTOME_CASPASE_ACTIVATION_VIA_DEPENDENCE_RECEPTORS_IN_THE_ABSENCE_OF_LIGAND	10
MSigDB_Reactome	C2	CP:REACTOME	REACTOME_CASPASE_ACTIVATION_VIA_EXTRINSIC_APOPTOTIC_SIGNALLING_PATHWAY	26
MSigDB_Reactome	C2	CP:REACTOME	REACTOME_CASPASE_MEDIATED_CLEAVAGE_OF_CYTOSKELETAL_PROTEINS	12
MSigDB_Reactome	C2	CP:REACTOME	REACTOME_CA_DEPENDENT_EVENTS	37
MSigDB_Reactome	C2	CP:REACTOME	REACTOME_CD209_DC_SIGN_SIGNALING	21
MSigDB_Reactome	C2	CP:REACTOME	REACTOME_CD22_MEDIATED_BCR_REGULATION	61
MSigDB_Reactome	C2	CP:REACTOME	REACTOME_CD28_DEPENDENT_PI3K_AKT_SIGNALING	27
MSigDB_Reactome	C2	CP:REACTOME	REACTOME_CD28_DEPENDENT_VAV1_PATHWAY	12
MSigDB_Reactome	C2	CP:REACTOME	REACTOME_CDC42_GTPASE_CYCLE	155
MSigDB_Reactome	C2	CP:REACTOME	REACTOME_CDK_MEDIATED_PHOSPHORYLATION_AND_REMOVAL_OF_CDC6	60
MSigDB_Reactome	C2	CP:REACTOME	REACTOME_CELLULAR_HEXOSE_TRANSPORT	21
MSigDB_Reactome	C2	CP:REACTOME	REACTOME_CELLULAR_RESPONSES_TO_MECHANICAL_STIMULI	103
MSigDB_Reactome	C2	CP:REACTOME	REACTOME_CELLULAR_RESPONSE_TO_CHEMICAL_STRESS	197
MSigDB_Reactome	C2	CP:REACTOME	REACTOME_CELLULAR_RESPONSE_TO_HEAT_STRESS	101
MSigDB_Reactome	C2	CP:REACTOME	REACTOME_CELLULAR_RESPONSE_TO_HYPOXIA	62
MSigDB_Reactome	C2	CP:REACTOME	REACTOME_CELLULAR_RESPONSE_TO_STARVATION	157
MSigDB_Reactome	C2	CP:REACTOME	REACTOME_CELLULAR_SENESCENCE	197
MSigDB_Reactome	C2	CP:REACTOME	REACTOME_CELL_CELL_COMMUNICATION	155
MSigDB_Reactome	C2	CP:REACTOME	REACTOME_CELL_CELL_JUNCTION_ORGANIZATION	90
MSigDB_Reactome	C2	CP:REACTOME	REACTOME_CELL_CYCLE_CHECKPOINTS	278
MSigDB_Reactome	C2	CP:REACTOME	REACTOME_CELL_DEATH_SIGNALLING_VIA_NRAGE_NRIF_AND_NADE	76
MSigDB_Reactome	C2	CP:REACTOME	REACTOME_CELL_EXTRACELLULAR_MATRIX_INTERACTIONS	18
MSigDB_Reactome	C2	CP:REACTOME	REACTOME_CELL_JUNCTION_ORGANIZATION	117
MSigDB_Reactome	C2	CP:REACTOME	REACTOME_CELL_SURFACE_INTERACTIONS_AT_THE_VASCULAR_WALL	194
MSigDB_Reactome	C2	CP:REACTOME	REACTOME_CGMP_EFFECTS	16
MSigDB_Reactome	C2	CP:REACTOME	REACTOME_CHAPERONE_MEDIATED_AUTOPHAGY	22
MSigDB_Reactome	C2	CP:REACTOME	REACTOME_CHEMOKINE_RECEPTORS_BIND_CHEMOKINES	57
MSigDB_Reactome	C2	CP:REACTOME	REACTOME_CHK1_CHK2_CDS1_MEDIATED_INACTIVATION_OF_CYCLIN_B_CDK1_COMPLEX	15
MSigDB_Reactome	C2	CP:REACTOME	REACTOME_CHOLESTEROL_BIOSYNTHESIS	27
MSigDB_Reactome	C2	CP:REACTOME	REACTOME_CHONDROITIN_SULFATE_BIOSYNTHESIS	20
MSigDB_Reactome	C2	CP:REACTOME	REACTOME_CHONDROITIN_SULFATE_DERMATAN_SULFATE_METABOLISM	51
MSigDB_Reactome	C2	CP:REACTOME	REACTOME_CHROMATIN_MODIFICATIONS_DURING_THE_MATERNAL_TO_ZYGOTIC_TRANSITION_MZT	70
MSigDB_Reactome	C2	CP:REACTOME	REACTOME_CHROMATIN_ORGANIZATION	287
MSigDB_Reactome	C2	CP:REACTOME	REACTOME_CHROMOSOME_MAINTENANCE	139
MSigDB_Reactome	C2	CP:REACTOME	REACTOME_CHYLOMICRON_ASSEMBLY	10
MSigDB_Reactome	C2	CP:REACTOME	REACTOME_CHYLOMICRON_REMODELING	10
MSigDB_Reactome	C2	CP:REACTOME	REACTOME_CILIUM_ASSEMBLY	201
MSigDB_Reactome	C2	CP:REACTOME	REACTOME_CIRCADIAN_CLOCK	112
MSigDB_Reactome	C2	CP:REACTOME	REACTOME_CITRIC_ACID_CYCLE_TCA_CYCLE	34
MSigDB_Reactome	C2	CP:REACTOME	REACTOME_CLASS_B_2_SECRETIN_FAMILY_RECEPTORS	94
MSigDB_Reactome	C2	CP:REACTOME	REACTOME_CLASS_C_3_METABOTROPIC_GLUTAMATE_PHEROMONE_RECEPTORS	39
MSigDB_Reactome	C2	CP:REACTOME	REACTOME_CLASS_I_PEROXISOMAL_MEMBRANE_PROTEIN_IMPORT	20
MSigDB_Reactome	C2	CP:REACTOME	REACTOME_CLATHRIN_MEDIATED_ENDOCYTOSIS	145
MSigDB_Reactome	C2	CP:REACTOME	REACTOME_CLEC7A_DECTIN_1_INDUCES_NFAT_ACTIVATION	11
MSigDB_Reactome	C2	CP:REACTOME	REACTOME_CLEC7A_DECTIN_1_SIGNALING	87
MSigDB_Reactome	C2	CP:REACTOME	REACTOME_COBALAMIN_CBL_VITAMIN_B12_TRANSPORT_AND_METABOLISM	22
MSigDB_Reactome	C2	CP:REACTOME	REACTOME_COHESIN_LOADING_ONTO_CHROMATIN	10
MSigDB_Reactome	C2	CP:REACTOME	REACTOME_COLLAGEN_BIOSYNTHESIS_AND_MODIFYING_ENZYMES	67
MSigDB_Reactome	C2	CP:REACTOME	REACTOME_COLLAGEN_CHAIN_TRIMERIZATION	44
MSigDB_Reactome	C2	CP:REACTOME	REACTOME_COLLAGEN_DEGRADATION	64
MSigDB_Reactome	C2	CP:REACTOME	REACTOME_COLLAGEN_FORMATION	90
MSigDB_Reactome	C2	CP:REACTOME	REACTOME_COMMON_PATHWAY_OF_FIBRIN_CLOT_FORMATION	22
MSigDB_Reactome	C2	CP:REACTOME	REACTOME_COMPLEMENT_CASCADE	115
MSigDB_Reactome	C2	CP:REACTOME	REACTOME_COMPLEX_III_ASSEMBLY	26
MSigDB_Reactome	C2	CP:REACTOME	REACTOME_COMPLEX_IV_ASSEMBLY	48
MSigDB_Reactome	C2	CP:REACTOME	REACTOME_COMPLEX_I_BIOGENESIS	68
MSigDB_Reactome	C2	CP:REACTOME	REACTOME_CONDENSATION_OF_PROMETAPHASE_CHROMOSOMES	11
MSigDB_Reactome	C2	CP:REACTOME	REACTOME_CONDENSATION_OF_PROPHASE_CHROMOSOMES	73
MSigDB_Reactome	C2	CP:REACTOME	REACTOME_CONSTITUTIVE_SIGNALING_BY_ABERRANT_PI3K_IN_CANCER	86
MSigDB_Reactome	C2	CP:REACTOME	REACTOME_CONSTITUTIVE_SIGNALING_BY_AKT1_E17K_IN_CANCER	26
MSigDB_Reactome	C2	CP:REACTOME	REACTOME_CONSTITUTIVE_SIGNALING_BY_EGFRVIII	15
MSigDB_Reactome	C2	CP:REACTOME	REACTOME_CONSTITUTIVE_SIGNALING_BY_LIGAND_RESPONSIVE_EGFR_CANCER_VARIANTS	19
MSigDB_Reactome	C2	CP:REACTOME	REACTOME_CONSTITUTIVE_SIGNALING_BY_OVEREXPRESSED_ERBB2	11
MSigDB_Reactome	C2	CP:REACTOME	REACTOME_CONVERSION_FROM_APC_C_CDC20_TO_APC_C_CDH1_IN_LATE_ANAPHASE	20
MSigDB_Reactome	C2	CP:REACTOME	REACTOME_COOPERATION_OF_PDCL_PHLP1_AND_TRIC_CCT_IN_G_PROTEIN_BETA_FOLDING	38
MSigDB_Reactome	C2	CP:REACTOME	REACTOME_COOPERATION_OF_PREFOLDIN_AND_TRIC_CCT_IN_ACTIN_AND_TUBULIN_FOLDING	33
MSigDB_Reactome	C2	CP:REACTOME	REACTOME_COPII_MEDIATED_VESICLE_TRANSPORT	69
MSigDB_Reactome	C2	CP:REACTOME	REACTOME_COPI_DEPENDENT_GOLGI_TO_ER_RETROGRADE_TRAFFIC	100
MSigDB_Reactome	C2	CP:REACTOME	REACTOME_COPI_INDEPENDENT_GOLGI_TO_ER_RETROGRADE_TRAFFIC	53
MSigDB_Reactome	C2	CP:REACTOME	REACTOME_COPI_MEDIATED_ANTEROGRADE_TRANSPORT	102
MSigDB_Reactome	C2	CP:REACTOME	REACTOME_CO_INHIBITION_BY_CTLA4	21
MSigDB_Reactome	C2	CP:REACTOME	REACTOME_CO_INHIBITION_BY_PD_1	28
MSigDB_Reactome	C2	CP:REACTOME	REACTOME_CO_STIMULATION_BY_CD28	48
MSigDB_Reactome	C2	CP:REACTOME	REACTOME_CO_STIMULATION_BY_ICOS	11
MSigDB_Reactome	C2	CP:REACTOME	REACTOME_CREATINE_METABOLISM	11
MSigDB_Reactome	C2	CP:REACTOME	REACTOME_CREATION_OF_C4_AND_C2_ACTIVATORS	71
MSigDB_Reactome	C2	CP:REACTOME	REACTOME_CREB1_PHOSPHORYLATION_THROUGH_NMDA_RECEPTOR_MEDIATED_ACTIVATION_OF_RAS_SIGNALING	28
MSigDB_Reactome	C2	CP:REACTOME	REACTOME_CREB1_PHOSPHORYLATION_THROUGH_THE_ACTIVATION_OF_ADENYLATE_CYCLASE	12
MSigDB_Reactome	C2	CP:REACTOME	REACTOME_CRISTAE_FORMATION	33
MSigDB_Reactome	C2	CP:REACTOME	REACTOME_CRMPS_IN_SEMA3A_SIGNALING	16
MSigDB_Reactome	C2	CP:REACTOME	REACTOME_CROSSLINKING_OF_COLLAGEN_FIBRILS	18
MSigDB_Reactome	C2	CP:REACTOME	REACTOME_CROSS_PRESENTATION_OF_SOLUBLE_EXOGENOUS_ANTIGENS_ENDOSOMES	42
MSigDB_Reactome	C2	CP:REACTOME	REACTOME_CS_DS_DEGRADATION	14
MSigDB_Reactome	C2	CP:REACTOME	REACTOME_CYCLIN_A_B1_B2_ASSOCIATED_EVENTS_DURING_G2_M_TRANSITION	32
MSigDB_Reactome	C2	CP:REACTOME	REACTOME_CYCLIN_A_CDK2_ASSOCIATED_EVENTS_AT_S_PHASE_ENTRY	75
MSigDB_Reactome	C2	CP:REACTOME	REACTOME_CYCLIN_D_ASSOCIATED_EVENTS_IN_G1	47
MSigDB_Reactome	C2	CP:REACTOME	REACTOME_CYP2E1_REACTIONS	11
MSigDB_Reactome	C2	CP:REACTOME	REACTOME_CYTOCHROME_C_MEDIATED_APOPTOTIC_RESPONSE	13
MSigDB_Reactome	C2	CP:REACTOME	REACTOME_CYTOCHROME_P450_ARRANGED_BY_SUBSTRATE_TYPE	64
MSigDB_Reactome	C2	CP:REACTOME	REACTOME_CYTOPROTECTION_BY_HMOX1	60
MSigDB_Reactome	C2	CP:REACTOME	REACTOME_CYTOSOLIC_IRON_SULFUR_CLUSTER_ASSEMBLY	13
MSigDB_Reactome	C2	CP:REACTOME	REACTOME_CYTOSOLIC_SENSORS_OF_PATHOGEN_ASSOCIATED_DNA	64
MSigDB_Reactome	C2	CP:REACTOME	REACTOME_CYTOSOLIC_SULFONATION_OF_SMALL_MOLECULES	24
MSigDB_Reactome	C2	CP:REACTOME	REACTOME_CYTOSOLIC_TRNA_AMINOACYLATION	24
MSigDB_Reactome	C2	CP:REACTOME	REACTOME_C_TYPE_LECTIN_RECEPTORS_CLRS	127
MSigDB_Reactome	C2	CP:REACTOME	REACTOME_DAG_AND_IP3_SIGNALING	41
MSigDB_Reactome	C2	CP:REACTOME	REACTOME_DAP12_INTERACTIONS	45
MSigDB_Reactome	C2	CP:REACTOME	REACTOME_DAP12_SIGNALING	29
MSigDB_Reactome	C2	CP:REACTOME	REACTOME_DARPP_32_EVENTS	24
MSigDB_Reactome	C2	CP:REACTOME	REACTOME_DCC_MEDIATED_ATTRACTIVE_SIGNALING	14
MSigDB_Reactome	C2	CP:REACTOME	REACTOME_DDX58_IFIH1_MEDIATED_INDUCTION_OF_INTERFERON_ALPHA_BETA	82
MSigDB_Reactome	C2	CP:REACTOME	REACTOME_DEACTIVATION_OF_THE_BETA_CATENIN_TRANSACTIVATING_COMPLEX	42
MSigDB_Reactome	C2	CP:REACTOME	REACTOME_DEADENYLATION_DEPENDENT_MRNA_DECAY	56
MSigDB_Reactome	C2	CP:REACTOME	REACTOME_DEADENYLATION_OF_MRNA	25
MSigDB_Reactome	C2	CP:REACTOME	REACTOME_DEATH_RECEPTOR_SIGNALING	154
MSigDB_Reactome	C2	CP:REACTOME	REACTOME_DECTIN_1_MEDIATED_NONCANONICAL_NF_KB_SIGNALING	49
MSigDB_Reactome	C2	CP:REACTOME	REACTOME_DECTIN_2_FAMILY	26
MSigDB_Reactome	C2	CP:REACTOME	REACTOME_DEFECTIVE_B4GALT7_CAUSES_EDS_PROGEROID_TYPE	20
MSigDB_Reactome	C2	CP:REACTOME	REACTOME_DEFECTIVE_C1GALT1C1_CAUSES_TNPS	17
MSigDB_Reactome	C2	CP:REACTOME	REACTOME_DEFECTIVE_CFTR_CAUSES_CYSTIC_FIBROSIS	48
MSigDB_Reactome	C2	CP:REACTOME	REACTOME_DEFECTIVE_EXT2_CAUSES_EXOSTOSES_2	14
MSigDB_Reactome	C2	CP:REACTOME	REACTOME_DEFECTIVE_GALNT3_CAUSES_HFTC	16
MSigDB_Reactome	C2	CP:REACTOME	REACTOME_DEFECTIVE_INTRINSIC_PATHWAY_FOR_APOPTOSIS	25
MSigDB_Reactome	C2	CP:REACTOME	REACTOME_DEFECTS_IN_COBALAMIN_B12_METABOLISM	14
MSigDB_Reactome	C2	CP:REACTOME	REACTOME_DEFECTS_IN_VITAMIN_AND_COFACTOR_METABOLISM	22
MSigDB_Reactome	C2	CP:REACTOME	REACTOME_DEFECTS_OF_CONTACT_ACTIVATION_SYSTEM_CAS_AND_KALLIKREIN_KININ_SYSTEM_KKS	16
MSigDB_Reactome	C2	CP:REACTOME	REACTOME_DEFENSINS	53
MSigDB_Reactome	C2	CP:REACTOME	REACTOME_DEGRADATION_OF_AXIN	42
MSigDB_Reactome	C2	CP:REACTOME	REACTOME_DEGRADATION_OF_BETA_CATENIN_BY_THE_DESTRUCTION_COMPLEX	72
MSigDB_Reactome	C2	CP:REACTOME	REACTOME_DEGRADATION_OF_CRY_AND_PER_PROTEINS	48
MSigDB_Reactome	C2	CP:REACTOME	REACTOME_DEGRADATION_OF_CYSTEINE_AND_HOMOCYSTEINE	15
MSigDB_Reactome	C2	CP:REACTOME	REACTOME_DEGRADATION_OF_DVL	44
MSigDB_Reactome	C2	CP:REACTOME	REACTOME_DEGRADATION_OF_GLI1_BY_THE_PROTEASOME	47
MSigDB_Reactome	C2	CP:REACTOME	REACTOME_DEGRADATION_OF_THE_EXTRACELLULAR_MATRIX	140
MSigDB_Reactome	C2	CP:REACTOME	REACTOME_DEPOLYMERIZATION_OF_THE_NUCLEAR_LAMINA	15
MSigDB_Reactome	C2	CP:REACTOME	REACTOME_DEPOSITION_OF_NEW_CENPA_CONTAINING_NUCLEOSOMES_AT_THE_CENTROMERE	72
MSigDB_Reactome	C2	CP:REACTOME	REACTOME_DERMATAN_SULFATE_BIOSYNTHESIS	11
MSigDB_Reactome	C2	CP:REACTOME	REACTOME_DETOXIFICATION_OF_REACTIVE_OXYGEN_SPECIES	37
MSigDB_Reactome	C2	CP:REACTOME	REACTOME_DEUBIQUITINATION	285
MSigDB_Reactome	C2	CP:REACTOME	REACTOME_DEVELOPMENTAL_CELL_LINEAGES	121
MSigDB_Reactome	C2	CP:REACTOME	REACTOME_DEVELOPMENTAL_CELL_LINEAGES_OF_THE_EXOCRINE_PANCREAS	84
MSigDB_Reactome	C2	CP:REACTOME	REACTOME_DEVELOPMENTAL_LINEAGE_OF_MULTIPOTENT_PANCREATIC_PROGENITOR_CELLS	18
MSigDB_Reactome	C2	CP:REACTOME	REACTOME_DEVELOPMENTAL_LINEAGE_OF_PANCREATIC_ACINAR_CELLS	32
MSigDB_Reactome	C2	CP:REACTOME	REACTOME_DEVELOPMENTAL_LINEAGE_OF_PANCREATIC_DUCTAL_CELLS	48
MSigDB_Reactome	C2	CP:REACTOME	REACTOME_DIFFERENTIATION_OF_KERATINOCYTES_IN_INTERFOLLICULAR_EPIDERMIS_IN_MAMMALIAN_SKIN	40
MSigDB_Reactome	C2	CP:REACTOME	REACTOME_DIGESTION	23
MSigDB_Reactome	C2	CP:REACTOME	REACTOME_DIGESTION_AND_ABSORPTION	28
MSigDB_Reactome	C2	CP:REACTOME	REACTOME_DIGESTION_OF_DIETARY_CARBOHYDRATE	11
MSigDB_Reactome	C2	CP:REACTOME	REACTOME_DISASSEMBLY_OF_THE_DESTRUCTION_COMPLEX_AND_RECRUITMENT_OF_AXIN_TO_THE_MEMBRANE	31
MSigDB_Reactome	C2	CP:REACTOME	REACTOME_DISEASES_ASSOCIATED_WITH_GLYCOSAMINOGLYCAN_METABOLISM	41
MSigDB_Reactome	C2	CP:REACTOME	REACTOME_DISEASES_ASSOCIATED_WITH_GLYCOSYLATION_PRECURSOR_BIOSYNTHESIS	16
MSigDB_Reactome	C2	CP:REACTOME	REACTOME_DISEASES_ASSOCIATED_WITH_N_GLYCOSYLATION_OF_PROTEINS	20
MSigDB_Reactome	C2	CP:REACTOME	REACTOME_DISEASES_ASSOCIATED_WITH_O_GLYCOSYLATION_OF_PROTEINS	68
MSigDB_Reactome	C2	CP:REACTOME	REACTOME_DISEASES_ASSOCIATED_WITH_SURFACTANT_METABOLISM	10
MSigDB_Reactome	C2	CP:REACTOME	REACTOME_DISEASES_OF_BRANCHED_CHAIN_AMINO_ACID_CATABOLISM	13
MSigDB_Reactome	C2	CP:REACTOME	REACTOME_DISEASES_OF_CARBOHYDRATE_METABOLISM	34
MSigDB_Reactome	C2	CP:REACTOME	REACTOME_DISEASES_OF_DNA_REPAIR	51
MSigDB_Reactome	C2	CP:REACTOME	REACTOME_DISEASES_OF_GLYCOSYLATION	144
MSigDB_Reactome	C2	CP:REACTOME	REACTOME_DISEASES_OF_HEMOSTASIS	19
MSigDB_Reactome	C2	CP:REACTOME	REACTOME_DISEASES_OF_IMMUNE_SYSTEM	32
MSigDB_Reactome	C2	CP:REACTOME	REACTOME_DISEASES_OF_METABOLISM	262
MSigDB_Reactome	C2	CP:REACTOME	REACTOME_DISEASES_OF_MITOTIC_CELL_CYCLE	38
MSigDB_Reactome	C2	CP:REACTOME	REACTOME_DISEASES_OF_PROGRAMMED_CELL_DEATH	104
MSigDB_Reactome	C2	CP:REACTOME	REACTOME_DISORDERS_OF_TRANSMEMBRANE_TRANSPORTERS	164
MSigDB_Reactome	C2	CP:REACTOME	REACTOME_DISSOLUTION_OF_FIBRIN_CLOT	13
MSigDB_Reactome	C2	CP:REACTOME	REACTOME_DNA_DAMAGE_BYPASS	48
MSigDB_Reactome	C2	CP:REACTOME	REACTOME_DNA_DAMAGE_RECOGNITION_IN_GG_NER	38
MSigDB_Reactome	C2	CP:REACTOME	REACTOME_DNA_DAMAGE_TELOMERE_STRESS_INDUCED_SENESCENCE	79
MSigDB_Reactome	C2	CP:REACTOME	REACTOME_DNA_DOUBLE_STRAND_BREAK_REPAIR	170
MSigDB_Reactome	C2	CP:REACTOME	REACTOME_DNA_DOUBLE_STRAND_BREAK_RESPONSE	78
MSigDB_Reactome	C2	CP:REACTOME	REACTOME_DNA_METHYLATION	64
MSigDB_Reactome	C2	CP:REACTOME	REACTOME_DNA_REPLICATION	184
MSigDB_Reactome	C2	CP:REACTOME	REACTOME_DNA_REPLICATION_PRE_INITIATION	149
MSigDB_Reactome	C2	CP:REACTOME	REACTOME_DNA_STRAND_ELONGATION	32
MSigDB_Reactome	C2	CP:REACTOME	REACTOME_DOPAMINE_NEUROTRANSMITTER_RELEASE_CYCLE	23
MSigDB_Reactome	C2	CP:REACTOME	REACTOME_DOWNREGULATION_OF_ERBB2_ERBB3_SIGNALING	13
MSigDB_Reactome	C2	CP:REACTOME	REACTOME_DOWNREGULATION_OF_ERBB2_SIGNALING	29
MSigDB_Reactome	C2	CP:REACTOME	REACTOME_DOWNREGULATION_OF_SMAD2_3_SMAD4_TRANSCRIPTIONAL_ACTIVITY	31
MSigDB_Reactome	C2	CP:REACTOME	REACTOME_DOWNREGULATION_OF_TGF_BETA_RECEPTOR_SIGNALING	26
MSigDB_Reactome	C2	CP:REACTOME	REACTOME_DOWNSTREAM_SIGNALING_EVENTS_OF_B_CELL_RECEPTOR_BCR	68
MSigDB_Reactome	C2	CP:REACTOME	REACTOME_DOWNSTREAM_SIGNALING_OF_ACTIVATED_FGFR1	31
MSigDB_Reactome	C2	CP:REACTOME	REACTOME_DOWNSTREAM_SIGNALING_OF_ACTIVATED_FGFR2	30
MSigDB_Reactome	C2	CP:REACTOME	REACTOME_DOWNSTREAM_SIGNALING_OF_ACTIVATED_FGFR3	25
MSigDB_Reactome	C2	CP:REACTOME	REACTOME_DOWNSTREAM_SIGNALING_OF_ACTIVATED_FGFR4	27
MSigDB_Reactome	C2	CP:REACTOME	REACTOME_DOWNSTREAM_SIGNAL_TRANSDUCTION	29
MSigDB_Reactome	C2	CP:REACTOME	REACTOME_DOWNSTREAM_TCR_SIGNALING	89
MSigDB_Reactome	C2	CP:REACTOME	REACTOME_DRUG_ADME	109
MSigDB_Reactome	C2	CP:REACTOME	REACTOME_DUAL_INCISION_IN_GG_NER	41
MSigDB_Reactome	C2	CP:REACTOME	REACTOME_DUAL_INCISION_IN_TC_NER	63
MSigDB_Reactome	C2	CP:REACTOME	REACTOME_E2F_MEDIATED_REGULATION_OF_DNA_REPLICATION	22
MSigDB_Reactome	C2	CP:REACTOME	REACTOME_E3_UBIQUITIN_LIGASES_UBIQUITINATE_TARGET_PROTEINS	59
MSigDB_Reactome	C2	CP:REACTOME	REACTOME_EARLY_PHASE_OF_HIV_LIFE_CYCLE	14
MSigDB_Reactome	C2	CP:REACTOME	REACTOME_EARLY_SARS_COV_2_INFECTION_EVENTS	37
MSigDB_Reactome	C2	CP:REACTOME	REACTOME_ECM_PROTEOGLYCANS	76
MSigDB_Reactome	C2	CP:REACTOME	REACTOME_EFFECTS_OF_PIP2_HYDROLYSIS	27
MSigDB_Reactome	C2	CP:REACTOME	REACTOME_EGFR_DOWNREGULATION	31
MSigDB_Reactome	C2	CP:REACTOME	REACTOME_EGR2_AND_SOX10_MEDIATED_INITIATION_OF_SCHWANN_CELL_MYELINATION	29
MSigDB_Reactome	C2	CP:REACTOME	REACTOME_EICOSANOIDS	12
MSigDB_Reactome	C2	CP:REACTOME	REACTOME_EICOSANOID_LIGAND_BINDING_RECEPTORS	15
MSigDB_Reactome	C2	CP:REACTOME	REACTOME_ELASTIC_FIBRE_FORMATION	44
MSigDB_Reactome	C2	CP:REACTOME	REACTOME_ELEVATION_OF_CYTOSOLIC_CA2_LEVELS	16
MSigDB_Reactome	C2	CP:REACTOME	REACTOME_ENDOGENOUS_STEROLS	25
MSigDB_Reactome	C2	CP:REACTOME	REACTOME_ENDOSOMAL_SORTING_COMPLEX_REQUIRED_FOR_TRANSPORT_ESCRT	31
MSigDB_Reactome	C2	CP:REACTOME	REACTOME_ENDOSOMAL_VACUOLAR_PATHWAY	11
MSigDB_Reactome	C2	CP:REACTOME	REACTOME_ENERGY_DEPENDENT_REGULATION_OF_MTOR_BY_LKB1_AMPK	29
MSigDB_Reactome	C2	CP:REACTOME	REACTOME_ENOS_ACTIVATION	13
MSigDB_Reactome	C2	CP:REACTOME	REACTOME_EPHA_MEDIATED_GROWTH_CONE_COLLAPSE	29
MSigDB_Reactome	C2	CP:REACTOME	REACTOME_EPHB_MEDIATED_FORWARD_SIGNALING	42
MSigDB_Reactome	C2	CP:REACTOME	REACTOME_EPHRIN_SIGNALING	19
MSigDB_Reactome	C2	CP:REACTOME	REACTOME_EPH_EPHRIN_MEDIATED_REPULSION_OF_CELLS	51
MSigDB_Reactome	C2	CP:REACTOME	REACTOME_EPH_EPHRIN_SIGNALING	92
MSigDB_Reactome	C2	CP:REACTOME	REACTOME_EPIGENETIC_REGULATION_BY_WDR5_CONTAINING_HISTONE_MODIFYING_COMPLEXES	166
MSigDB_Reactome	C2	CP:REACTOME	REACTOME_EPIGENETIC_REGULATION_OF_GENE_EXPRESSION_BY_MLL3_AND_MLL4_COMPLEXES	134
MSigDB_Reactome	C2	CP:REACTOME	REACTOME_ERBB2_ACTIVATES_PTK6_SIGNALING	13
MSigDB_Reactome	C2	CP:REACTOME	REACTOME_ERBB2_REGULATES_CELL_MOTILITY	15
MSigDB_Reactome	C2	CP:REACTOME	REACTOME_ERCC6_CSB_AND_EHMT2_G9A_POSITIVELY_REGULATE_RRNA_EXPRESSION	75
MSigDB_Reactome	C2	CP:REACTOME	REACTOME_ERKS_ARE_INACTIVATED	13
MSigDB_Reactome	C2	CP:REACTOME	REACTOME_ERK_MAPK_TARGETS	22
MSigDB_Reactome	C2	CP:REACTOME	REACTOME_ERYTHROCYTES_TAKE_UP_CARBON_DIOXIDE_AND_RELEASE_OXYGEN	13
MSigDB_Reactome	C2	CP:REACTOME	REACTOME_ERYTHROPOIETIN_ACTIVATES_PHOSPHOINOSITIDE_3_KINASE_PI3K	12
MSigDB_Reactome	C2	CP:REACTOME	REACTOME_ERYTHROPOIETIN_ACTIVATES_RAS	14
MSigDB_Reactome	C2	CP:REACTOME	REACTOME_ER_QUALITY_CONTROL_COMPARTMENT_ERQC	21
MSigDB_Reactome	C2	CP:REACTOME	REACTOME_ER_TO_GOLGI_ANTEROGRADE_TRANSPORT	156
MSigDB_Reactome	C2	CP:REACTOME	REACTOME_ESR_MEDIATED_SIGNALING	220
MSigDB_Reactome	C2	CP:REACTOME	REACTOME_ESTABLISHMENT_OF_SISTER_CHROMATID_COHESION	11
MSigDB_Reactome	C2	CP:REACTOME	REACTOME_ESTROGEN_DEPENDENT_GENE_EXPRESSION	149
MSigDB_Reactome	C2	CP:REACTOME	REACTOME_ESTROGEN_DEPENDENT_NUCLEAR_EVENTS_DOWNSTREAM_OF_ESR_MEMBRANE_SIGNALING	24
MSigDB_Reactome	C2	CP:REACTOME	REACTOME_ETHANOL_OXIDATION	12
MSigDB_Reactome	C2	CP:REACTOME	REACTOME_EUKARYOTIC_TRANSLATION_ELONGATION	94
MSigDB_Reactome	C2	CP:REACTOME	REACTOME_EUKARYOTIC_TRANSLATION_INITIATION	120
MSigDB_Reactome	C2	CP:REACTOME	REACTOME_EVASION_BY_RSV_OF_HOST_INTERFERON_RESPONSES	35
MSigDB_Reactome	C2	CP:REACTOME	REACTOME_EXPORT_OF_VIRAL_RIBONUCLEOPROTEINS_FROM_NUCLEUS	33
MSigDB_Reactome	C2	CP:REACTOME	REACTOME_EXPRESSION_OF_BMAL_ARNTL_CLOCK_AND_NPAS2	36
MSigDB_Reactome	C2	CP:REACTOME	REACTOME_EXTENSION_OF_TELOMERES	51
MSigDB_Reactome	C2	CP:REACTOME	REACTOME_EXTRA_NUCLEAR_ESTROGEN_SIGNALING	75
MSigDB_Reactome	C2	CP:REACTOME	REACTOME_FACTORS_INVOLVED_IN_MEGAKARYOCYTE_DEVELOPMENT_AND_PLATELET_PRODUCTION	170
MSigDB_Reactome	C2	CP:REACTOME	REACTOME_FANCONI_ANEMIA_PATHWAY	39
MSigDB_Reactome	C2	CP:REACTOME	REACTOME_FATTY_ACIDS	15
MSigDB_Reactome	C2	CP:REACTOME	REACTOME_FATTY_ACID_METABOLISM	175
MSigDB_Reactome	C2	CP:REACTOME	REACTOME_FATTY_ACYL_COA_BIOSYNTHESIS	37
MSigDB_Reactome	C2	CP:REACTOME	REACTOME_FBXL7_DOWN_REGULATES_AURKA_DURING_MITOTIC_ENTRY_AND_IN_EARLY_MITOSIS	42
MSigDB_Reactome	C2	CP:REACTOME	REACTOME_FCERI_MEDIATED_CA_2_MOBILIZATION	86
MSigDB_Reactome	C2	CP:REACTOME	REACTOME_FCERI_MEDIATED_MAPK_ACTIVATION	87
MSigDB_Reactome	C2	CP:REACTOME	REACTOME_FCERI_MEDIATED_NF_KB_ACTIVATION	123
MSigDB_Reactome	C2	CP:REACTOME	REACTOME_FCGAMMA_RECEPTOR_FCGR_DEPENDENT_PHAGOCYTOSIS	143
MSigDB_Reactome	C2	CP:REACTOME	REACTOME_FCGR3A_MEDIATED_IL10_SYNTHESIS	95
MSigDB_Reactome	C2	CP:REACTOME	REACTOME_FCGR_ACTIVATION	69
MSigDB_Reactome	C2	CP:REACTOME	REACTOME_FC_EPSILON_RECEPTOR_FCERI_SIGNALING	173
MSigDB_Reactome	C2	CP:REACTOME	REACTOME_FERTILIZATION	26
MSigDB_Reactome	C2	CP:REACTOME	REACTOME_FGFR1C_LIGAND_BINDING_AND_ACTIVATION	14
MSigDB_Reactome	C2	CP:REACTOME	REACTOME_FGFR1_LIGAND_BINDING_AND_ACTIVATION	18
MSigDB_Reactome	C2	CP:REACTOME	REACTOME_FGFR1_MUTANT_RECEPTOR_ACTIVATION	31
MSigDB_Reactome	C2	CP:REACTOME	REACTOME_FGFR2B_LIGAND_BINDING_AND_ACTIVATION	10
MSigDB_Reactome	C2	CP:REACTOME	REACTOME_FGFR2C_LIGAND_BINDING_AND_ACTIVATION	13
MSigDB_Reactome	C2	CP:REACTOME	REACTOME_FGFR2_ALTERNATIVE_SPLICING	27
MSigDB_Reactome	C2	CP:REACTOME	REACTOME_FGFR2_LIGAND_BINDING_AND_ACTIVATION	20
MSigDB_Reactome	C2	CP:REACTOME	REACTOME_FGFR2_MUTANT_RECEPTOR_ACTIVATION	33
MSigDB_Reactome	C2	CP:REACTOME	REACTOME_FGFR3_LIGAND_BINDING_AND_ACTIVATION	13
MSigDB_Reactome	C2	CP:REACTOME	REACTOME_FGFRL1_MODULATION_OF_FGFR1_SIGNALING	13
MSigDB_Reactome	C2	CP:REACTOME	REACTOME_FLT3_SIGNALING	38
MSigDB_Reactome	C2	CP:REACTOME	REACTOME_FLT3_SIGNALING_IN_DISEASE	28
MSigDB_Reactome	C2	CP:REACTOME	REACTOME_FOLDING_OF_ACTIN_BY_CCT_TRIC	10
MSigDB_Reactome	C2	CP:REACTOME	REACTOME_FORMATION_OF_APOPTOSOME	11
MSigDB_Reactome	C2	CP:REACTOME	REACTOME_FORMATION_OF_ATP_BY_CHEMIOSMOTIC_COUPLING	20
MSigDB_Reactome	C2	CP:REACTOME	REACTOME_FORMATION_OF_AXIAL_MESODERM	14
MSigDB_Reactome	C2	CP:REACTOME	REACTOME_FORMATION_OF_DEFINITIVE_ENDODERM	17
MSigDB_Reactome	C2	CP:REACTOME	REACTOME_FORMATION_OF_FIBRIN_CLOT_CLOTTING_CASCADE	39
MSigDB_Reactome	C2	CP:REACTOME	REACTOME_FORMATION_OF_INCISION_COMPLEX_IN_GG_NER	43
MSigDB_Reactome	C2	CP:REACTOME	REACTOME_FORMATION_OF_NEURONAL_PROGENITOR_AND_NEURONAL_BAF_NPBAF_AND_NBAF	25
MSigDB_Reactome	C2	CP:REACTOME	REACTOME_FORMATION_OF_PARAXIAL_MESODERM	59
MSigDB_Reactome	C2	CP:REACTOME	REACTOME_FORMATION_OF_RNA_POL_II_ELONGATION_COMPLEX	58
MSigDB_Reactome	C2	CP:REACTOME	REACTOME_FORMATION_OF_SENESCENCE_ASSOCIATED_HETEROCHROMATIN_FOCI_SAHF	17
MSigDB_Reactome	C2	CP:REACTOME	REACTOME_FORMATION_OF_TC_NER_PRE_INCISION_COMPLEX	51
MSigDB_Reactome	C2	CP:REACTOME	REACTOME_FORMATION_OF_THE_ANTERIOR_NEURAL_PLATE	11
MSigDB_Reactome	C2	CP:REACTOME	REACTOME_FORMATION_OF_THE_BETA_CATENIN_TCF_TRANSACTIVATING_COMPLEX	91
MSigDB_Reactome	C2	CP:REACTOME	REACTOME_FORMATION_OF_THE_CANONICAL_BAF_CBAF_COMPLEX	18
MSigDB_Reactome	C2	CP:REACTOME	REACTOME_FORMATION_OF_THE_CORNIFIED_ENVELOPE	129
MSigDB_Reactome	C2	CP:REACTOME	REACTOME_FORMATION_OF_THE_DYSTROPHIN_GLYCOPROTEIN_COMPLEX_DGC	36
MSigDB_Reactome	C2	CP:REACTOME	REACTOME_FORMATION_OF_THE_EARLY_ELONGATION_COMPLEX	33
MSigDB_Reactome	C2	CP:REACTOME	REACTOME_FORMATION_OF_THE_EMBRYONIC_STEM_CELL_BAF_ESBAF_COMPLEX	19
MSigDB_Reactome	C2	CP:REACTOME	REACTOME_FORMATION_OF_THE_NEPHRIC_DUCT	18
MSigDB_Reactome	C2	CP:REACTOME	REACTOME_FORMATION_OF_THE_NON_CANONICAL_BAF_NCBAF_COMPLEX	17
MSigDB_Reactome	C2	CP:REACTOME	REACTOME_FORMATION_OF_THE_POLYBROMO_BAF_PBAF_COMPLEX	18
MSigDB_Reactome	C2	CP:REACTOME	REACTOME_FORMATION_OF_THE_POSTERIOR_NEURAL_PLATE	10
MSigDB_Reactome	C2	CP:REACTOME	REACTOME_FORMATION_OF_THE_URETERIC_BUD	21
MSigDB_Reactome	C2	CP:REACTOME	REACTOME_FORMATION_OF_TUBULIN_FOLDING_INTERMEDIATES_BY_CCT_TRIC	26
MSigDB_Reactome	C2	CP:REACTOME	REACTOME_FORMATION_OF_WDR5_CONTAINING_HISTONE_MODIFYING_COMPLEXES	42
MSigDB_Reactome	C2	CP:REACTOME	REACTOME_FOXO_MEDIATED_TRANSCRIPTION	66
MSigDB_Reactome	C2	CP:REACTOME	REACTOME_FOXO_MEDIATED_TRANSCRIPTION_OF_CELL_CYCLE_GENES	17
MSigDB_Reactome	C2	CP:REACTOME	REACTOME_FOXO_MEDIATED_TRANSCRIPTION_OF_CELL_DEATH_GENES	16
MSigDB_Reactome	C2	CP:REACTOME	REACTOME_FOXO_MEDIATED_TRANSCRIPTION_OF_OXIDATIVE_STRESS_METABOLIC_AND_NEURONAL_GENES	30
MSigDB_Reactome	C2	CP:REACTOME	REACTOME_FREE_FATTY_ACIDS_REGULATE_INSULIN_SECRETION	11
MSigDB_Reactome	C2	CP:REACTOME	REACTOME_FRS_MEDIATED_FGFR1_SIGNALING	23
MSigDB_Reactome	C2	CP:REACTOME	REACTOME_FRS_MEDIATED_FGFR2_SIGNALING	25
MSigDB_Reactome	C2	CP:REACTOME	REACTOME_FRS_MEDIATED_FGFR3_SIGNALING	20
MSigDB_Reactome	C2	CP:REACTOME	REACTOME_FRS_MEDIATED_FGFR4_SIGNALING	22
MSigDB_Reactome	C2	CP:REACTOME	REACTOME_G0_AND_EARLY_G1	27
MSigDB_Reactome	C2	CP:REACTOME	REACTOME_G1_S_DNA_DAMAGE_CHECKPOINTS	55
MSigDB_Reactome	C2	CP:REACTOME	REACTOME_G1_S_SPECIFIC_TRANSCRIPTION	29
MSigDB_Reactome	C2	CP:REACTOME	REACTOME_G2_M_CHECKPOINTS	156
MSigDB_Reactome	C2	CP:REACTOME	REACTOME_G2_M_DNA_DAMAGE_CHECKPOINT	96
MSigDB_Reactome	C2	CP:REACTOME	REACTOME_GAB1_SIGNALOSOME	17
MSigDB_Reactome	C2	CP:REACTOME	REACTOME_GABA_B_RECEPTOR_ACTIVATION	43
MSigDB_Reactome	C2	CP:REACTOME	REACTOME_GABA_RECEPTOR_ACTIVATION	60
MSigDB_Reactome	C2	CP:REACTOME	REACTOME_GABA_SYNTHESIS_RELEASE_REUPTAKE_AND_DEGRADATION	19
MSigDB_Reactome	C2	CP:REACTOME	REACTOME_GAMMA_CARBOXYLATION_HYPUSINYLATION_HYDROXYLATION_AND_ARYLSULFATASE_ACTIVATION	61
MSigDB_Reactome	C2	CP:REACTOME	REACTOME_GAMMA_CARBOXYLATION_TRANSPORT_AND_AMINO_TERMINAL_CLEAVAGE_OF_PROTEINS	11
MSigDB_Reactome	C2	CP:REACTOME	REACTOME_GAP_FILLING_DNA_REPAIR_SYNTHESIS_AND_LIGATION_IN_GG_NER	25
MSigDB_Reactome	C2	CP:REACTOME	REACTOME_GAP_JUNCTION_ASSEMBLY	38
MSigDB_Reactome	C2	CP:REACTOME	REACTOME_GAP_JUNCTION_DEGRADATION	12
MSigDB_Reactome	C2	CP:REACTOME	REACTOME_GAP_JUNCTION_TRAFFICKING_AND_REGULATION	51
MSigDB_Reactome	C2	CP:REACTOME	REACTOME_GASTRIN_CREB_SIGNALLING_PATHWAY_VIA_PKC_AND_MAPK	18
MSigDB_Reactome	C2	CP:REACTOME	REACTOME_GASTRULATION	119
MSigDB_Reactome	C2	CP:REACTOME	REACTOME_GENERATION_OF_SECOND_MESSENGER_MOLECULES	39
MSigDB_Reactome	C2	CP:REACTOME	REACTOME_GENE_AND_PROTEIN_EXPRESSION_BY_JAK_STAT_SIGNALING_AFTER_INTERLEUKIN_12_STIMULATION	38
MSigDB_Reactome	C2	CP:REACTOME	REACTOME_GENE_SILENCING_BY_RNA	139
MSigDB_Reactome	C2	CP:REACTOME	REACTOME_GERM_LAYER_FORMATION_AT_GASTRULATION	17
MSigDB_Reactome	C2	CP:REACTOME	REACTOME_GLOBAL_GENOME_NUCLEOTIDE_EXCISION_REPAIR_GG_NER	84
MSigDB_Reactome	C2	CP:REACTOME	REACTOME_GLUCAGON_LIKE_PEPTIDE_1_GLP1_REGULATES_INSULIN_SECRETION	42
MSigDB_Reactome	C2	CP:REACTOME	REACTOME_GLUCAGON_SIGNALING_IN_METABOLIC_REGULATION	33
MSigDB_Reactome	C2	CP:REACTOME	REACTOME_GLUCAGON_TYPE_LIGAND_RECEPTORS	33
MSigDB_Reactome	C2	CP:REACTOME	REACTOME_GLUCOCORTICOID_BIOSYNTHESIS	10
MSigDB_Reactome	C2	CP:REACTOME	REACTOME_GLUCONEOGENESIS	26
MSigDB_Reactome	C2	CP:REACTOME	REACTOME_GLUCOSE_METABOLISM	84
MSigDB_Reactome	C2	CP:REACTOME	REACTOME_GLUCURONIDATION	27
MSigDB_Reactome	C2	CP:REACTOME	REACTOME_GLUTAMATE_AND_GLUTAMINE_METABOLISM	14
MSigDB_Reactome	C2	CP:REACTOME	REACTOME_GLUTAMATE_NEUROTRANSMITTER_RELEASE_CYCLE	24
MSigDB_Reactome	C2	CP:REACTOME	REACTOME_GLUTATHIONE_CONJUGATION	36
MSigDB_Reactome	C2	CP:REACTOME	REACTOME_GLUTATHIONE_SYNTHESIS_AND_RECYCLING	12
MSigDB_Reactome	C2	CP:REACTOME	REACTOME_GLYCEROPHOSPHOLIPID_BIOSYNTHESIS	129
MSigDB_Reactome	C2	CP:REACTOME	REACTOME_GLYCOGEN_BREAKDOWN_GLYCOGENOLYSIS	15
MSigDB_Reactome	C2	CP:REACTOME	REACTOME_GLYCOGEN_METABOLISM	26
MSigDB_Reactome	C2	CP:REACTOME	REACTOME_GLYCOGEN_STORAGE_DISEASES	16
MSigDB_Reactome	C2	CP:REACTOME	REACTOME_GLYCOGEN_SYNTHESIS	14
MSigDB_Reactome	C2	CP:REACTOME	REACTOME_GLYCOSAMINOGLYCAN_METABOLISM	127
MSigDB_Reactome	C2	CP:REACTOME	REACTOME_GLYCOSPHINGOLIPID_BIOSYNTHESIS	19
MSigDB_Reactome	C2	CP:REACTOME	REACTOME_GLYCOSPHINGOLIPID_CATABOLISM	39
MSigDB_Reactome	C2	CP:REACTOME	REACTOME_GLYCOSPHINGOLIPID_METABOLISM	58
MSigDB_Reactome	C2	CP:REACTOME	REACTOME_GLYOXYLATE_METABOLISM_AND_GLYCINE_DEGRADATION	19
MSigDB_Reactome	C2	CP:REACTOME	REACTOME_GOLGI_ASSOCIATED_VESICLE_BIOGENESIS	56
MSigDB_Reactome	C2	CP:REACTOME	REACTOME_GOLGI_CISTERNAE_PERICENTRIOLAR_STACK_REORGANIZATION	14
MSigDB_Reactome	C2	CP:REACTOME	REACTOME_GOLGI_TO_ER_RETROGRADE_TRANSPORT	134
MSigDB_Reactome	C2	CP:REACTOME	REACTOME_GP1B_IX_V_ACTIVATION_SIGNALLING	12
MSigDB_Reactome	C2	CP:REACTOME	REACTOME_GPER1_SIGNALING	45
MSigDB_Reactome	C2	CP:REACTOME	REACTOME_GPVI_MEDIATED_ACTIVATION_CASCADE	35
MSigDB_Reactome	C2	CP:REACTOME	REACTOME_GRB2_EVENTS_IN_ERBB2_SIGNALING	16
MSigDB_Reactome	C2	CP:REACTOME	REACTOME_GRB2_SOS_PROVIDES_LINKAGE_TO_MAPK_SIGNALING_FOR_INTEGRINS	15
MSigDB_Reactome	C2	CP:REACTOME	REACTOME_GROWTH_HORMONE_RECEPTOR_SIGNALING	24
MSigDB_Reactome	C2	CP:REACTOME	REACTOME_G_ALPHA_12_13_SIGNALLING_EVENTS	80
MSigDB_Reactome	C2	CP:REACTOME	REACTOME_G_ALPHA_Q_SIGNALLING_EVENTS	217
MSigDB_Reactome	C2	CP:REACTOME	REACTOME_G_ALPHA_S_SIGNALLING_EVENTS	157
MSigDB_Reactome	C2	CP:REACTOME	REACTOME_G_ALPHA_Z_SIGNALLING_EVENTS	48
MSigDB_Reactome	C2	CP:REACTOME	REACTOME_G_BETA_GAMMA_SIGNALLING_THROUGH_CDC42	20
MSigDB_Reactome	C2	CP:REACTOME	REACTOME_G_BETA_GAMMA_SIGNALLING_THROUGH_PI3KGAMMA	25
MSigDB_Reactome	C2	CP:REACTOME	REACTOME_G_PROTEIN_ACTIVATION	24
MSigDB_Reactome	C2	CP:REACTOME	REACTOME_G_PROTEIN_BETA_GAMMA_SIGNALLING	32
MSigDB_Reactome	C2	CP:REACTOME	REACTOME_G_PROTEIN_MEDIATED_EVENTS	54
MSigDB_Reactome	C2	CP:REACTOME	REACTOME_HATS_ACETYLATE_HISTONES	142
MSigDB_Reactome	C2	CP:REACTOME	REACTOME_HCMV_EARLY_EVENTS	138
MSigDB_Reactome	C2	CP:REACTOME	REACTOME_HCMV_INFECTION	162
MSigDB_Reactome	C2	CP:REACTOME	REACTOME_HCMV_LATE_EVENTS	116
MSigDB_Reactome	C2	CP:REACTOME	REACTOME_HDACS_DEACETYLATE_HISTONES	94
MSigDB_Reactome	C2	CP:REACTOME	REACTOME_HDL_REMODELING	10
MSigDB_Reactome	C2	CP:REACTOME	REACTOME_HDMS_DEMETHYLATE_HISTONES	50
MSigDB_Reactome	C2	CP:REACTOME	REACTOME_HDR_THROUGH_HOMOLOGOUS_RECOMBINATION_HRR	70
MSigDB_Reactome	C2	CP:REACTOME	REACTOME_HDR_THROUGH_MMEJ_ALT_NHEJ	12
MSigDB_Reactome	C2	CP:REACTOME	REACTOME_HDR_THROUGH_SINGLE_STRAND_ANNEALING_SSA	37
MSigDB_Reactome	C2	CP:REACTOME	REACTOME_HEDGEHOG_LIGAND_BIOGENESIS	52
MSigDB_Reactome	C2	CP:REACTOME	REACTOME_HEDGEHOG_OFF_STATE	100
MSigDB_Reactome	C2	CP:REACTOME	REACTOME_HEDGEHOG_ON_STATE	73
MSigDB_Reactome	C2	CP:REACTOME	REACTOME_HEME_BIOSYNTHESIS	14
MSigDB_Reactome	C2	CP:REACTOME	REACTOME_HEME_DEGRADATION	15
MSigDB_Reactome	C2	CP:REACTOME	REACTOME_HEME_SIGNALING	49
MSigDB_Reactome	C2	CP:REACTOME	REACTOME_HEPARAN_SULFATE_HEPARIN_HS_GAG_METABOLISM	58
MSigDB_Reactome	C2	CP:REACTOME	REACTOME_HH_MUTANTS_ABROGATE_LIGAND_SECRETION	46
MSigDB_Reactome	C2	CP:REACTOME	REACTOME_HIGHLY_CALCIUM_PERMEABLE_POSTSYNAPTIC_NICOTINIC_ACETYLCHOLINE_RECEPTORS	11
MSigDB_Reactome	C2	CP:REACTOME	REACTOME_HIGH_LAMINAR_FLOW_SHEAR_STRESS_ACTIVATES_SIGNALING_BY_PIEZO1_AND_PECAM1_CDH5_KDR_IN_ENDOTHELIAL_CELLS	69
MSigDB_Reactome	C2	CP:REACTOME	REACTOME_HIV_ELONGATION_ARREST_AND_RECOVERY	33
MSigDB_Reactome	C2	CP:REACTOME	REACTOME_HIV_INFECTION	218
MSigDB_Reactome	C2	CP:REACTOME	REACTOME_HIV_LIFE_CYCLE	149
MSigDB_Reactome	C2	CP:REACTOME	REACTOME_HIV_TRANSCRIPTION_ELONGATION	43
MSigDB_Reactome	C2	CP:REACTOME	REACTOME_HIV_TRANSCRIPTION_INITIATION	47
MSigDB_Reactome	C2	CP:REACTOME	REACTOME_HOMOLOGOUS_DNA_PAIRING_AND_STRAND_EXCHANGE	43
MSigDB_Reactome	C2	CP:REACTOME	REACTOME_HOMOLOGY_DIRECTED_REPAIR	140
MSigDB_Reactome	C2	CP:REACTOME	REACTOME_HORMONE_LIGAND_BINDING_RECEPTORS	12
MSigDB_Reactome	C2	CP:REACTOME	REACTOME_HOST_INTERACTIONS_OF_HIV_FACTORS	118
MSigDB_Reactome	C2	CP:REACTOME	REACTOME_HSF1_ACTIVATION	31
MSigDB_Reactome	C2	CP:REACTOME	REACTOME_HSF1_DEPENDENT_TRANSACTIVATION	38
MSigDB_Reactome	C2	CP:REACTOME	REACTOME_HSP90_CHAPERONE_CYCLE_FOR_STEROID_HORMONE_RECEPTORS_SHR_IN_THE_PRESENCE_OF_LIGAND	57
MSigDB_Reactome	C2	CP:REACTOME	REACTOME_HS_GAG_BIOSYNTHESIS	31
MSigDB_Reactome	C2	CP:REACTOME	REACTOME_HS_GAG_DEGRADATION	24
MSigDB_Reactome	C2	CP:REACTOME	REACTOME_HYALURONAN_METABOLISM	17
MSigDB_Reactome	C2	CP:REACTOME	REACTOME_HYALURONAN_UPTAKE_AND_DEGRADATION	12
MSigDB_Reactome	C2	CP:REACTOME	REACTOME_IKK_COMPLEX_RECRUITMENT_MEDIATED_BY_RIP1	23
MSigDB_Reactome	C2	CP:REACTOME	REACTOME_IL_6_TYPE_CYTOKINE_RECEPTOR_LIGAND_INTERACTIONS	17
MSigDB_Reactome	C2	CP:REACTOME	REACTOME_IMMUNOREGULATORY_INTERACTIONS_BETWEEN_A_LYMPHOID_AND_A_NON_LYMPHOID_CELL	191
MSigDB_Reactome	C2	CP:REACTOME	REACTOME_INACTIVATION_OF_CSF3_G_CSF_SIGNALING	25
MSigDB_Reactome	C2	CP:REACTOME	REACTOME_INCRETIN_SYNTHESIS_SECRETION_AND_INACTIVATION	24
MSigDB_Reactome	C2	CP:REACTOME	REACTOME_INDUCTION_OF_CELL_CELL_FUSION	13
MSigDB_Reactome	C2	CP:REACTOME	REACTOME_INFECTION_WITH_MYCOBACTERIUM_TUBERCULOSIS	27
MSigDB_Reactome	C2	CP:REACTOME	REACTOME_INFLAMMASOMES	21
MSigDB_Reactome	C2	CP:REACTOME	REACTOME_INFLUENZA_INFECTION	157
MSigDB_Reactome	C2	CP:REACTOME	REACTOME_INHIBITION_OF_DNA_RECOMBINATION_AT_TELOMERE	67
MSigDB_Reactome	C2	CP:REACTOME	REACTOME_INHIBITION_OF_REPLICATION_INITIATION_OF_DAMAGED_DNA_BY_RB1_E2F1	13
MSigDB_Reactome	C2	CP:REACTOME	REACTOME_INHIBITION_OF_THE_PROTEOLYTIC_ACTIVITY_OF_APC_C_REQUIRED_FOR_THE_ONSET_OF_ANAPHASE_BY_MITOTIC_SPINDLE_CHECKPOINT_COMPONENTS	21
MSigDB_Reactome	C2	CP:REACTOME	REACTOME_INITIAL_TRIGGERING_OF_COMPLEMENT	80
MSigDB_Reactome	C2	CP:REACTOME	REACTOME_INITIATION_OF_NUCLEAR_ENVELOPE_NE_REFORMATION	19
MSigDB_Reactome	C2	CP:REACTOME	REACTOME_INLB_MEDIATED_ENTRY_OF_LISTERIA_MONOCYTOGENES_INTO_HOST_CELL	15
MSigDB_Reactome	C2	CP:REACTOME	REACTOME_INOSITOL_PHOSPHATE_METABOLISM	48
MSigDB_Reactome	C2	CP:REACTOME	REACTOME_INSERTION_OF_TAIL_ANCHORED_PROTEINS_INTO_THE_ENDOPLASMIC_RETICULUM_MEMBRANE	22
MSigDB_Reactome	C2	CP:REACTOME	REACTOME_INSULIN_PROCESSING	25
MSigDB_Reactome	C2	CP:REACTOME	REACTOME_INSULIN_RECEPTOR_RECYCLING	30
MSigDB_Reactome	C2	CP:REACTOME	REACTOME_INSULIN_RECEPTOR_SIGNALLING_CASCADE	54
MSigDB_Reactome	C2	CP:REACTOME	REACTOME_INTEGRATION_OF_ENERGY_METABOLISM	108
MSigDB_Reactome	C2	CP:REACTOME	REACTOME_INTEGRIN_CELL_SURFACE_INTERACTIONS	85
MSigDB_Reactome	C2	CP:REACTOME	REACTOME_INTEGRIN_SIGNALING	27
MSigDB_Reactome	C2	CP:REACTOME	REACTOME_INTERACTIONS_OF_REV_WITH_HOST_CELLULAR_PROTEINS	37
MSigDB_Reactome	C2	CP:REACTOME	REACTOME_INTERACTIONS_OF_VPR_WITH_HOST_CELLULAR_PROTEINS	37
MSigDB_Reactome	C2	CP:REACTOME	REACTOME_INTERACTION_BETWEEN_L1_AND_ANKYRINS	31
MSigDB_Reactome	C2	CP:REACTOME	REACTOME_INTERACTION_WITH_CUMULUS_CELLS_AND_THE_ZONA_PELLUCIDA	11
MSigDB_Reactome	C2	CP:REACTOME	REACTOME_INTERCONVERSION_OF_NUCLEOTIDE_DI_AND_TRIPHOSPHATES	29
MSigDB_Reactome	C2	CP:REACTOME	REACTOME_INTERFERON_ALPHA_BETA_SIGNALING	78
MSigDB_Reactome	C2	CP:REACTOME	REACTOME_INTERFERON_GAMMA_SIGNALING	98
MSigDB_Reactome	C2	CP:REACTOME	REACTOME_INTERFERON_SIGNALING	280
MSigDB_Reactome	C2	CP:REACTOME	REACTOME_INTERLEUKIN_10_SIGNALING	45
MSigDB_Reactome	C2	CP:REACTOME	REACTOME_INTERLEUKIN_12_FAMILY_SIGNALING	57
MSigDB_Reactome	C2	CP:REACTOME	REACTOME_INTERLEUKIN_12_SIGNALING	47
MSigDB_Reactome	C2	CP:REACTOME	REACTOME_INTERLEUKIN_15_SIGNALING	14
MSigDB_Reactome	C2	CP:REACTOME	REACTOME_INTERLEUKIN_17_SIGNALING	71
MSigDB_Reactome	C2	CP:REACTOME	REACTOME_INTERLEUKIN_1_FAMILY_SIGNALING	139
MSigDB_Reactome	C2	CP:REACTOME	REACTOME_INTERLEUKIN_1_SIGNALING	101
MSigDB_Reactome	C2	CP:REACTOME	REACTOME_INTERLEUKIN_20_FAMILY_SIGNALING	26
MSigDB_Reactome	C2	CP:REACTOME	REACTOME_INTERLEUKIN_21_SIGNALING	10
MSigDB_Reactome	C2	CP:REACTOME	REACTOME_INTERLEUKIN_27_SIGNALING	11
MSigDB_Reactome	C2	CP:REACTOME	REACTOME_INTERLEUKIN_2_FAMILY_SIGNALING	44
MSigDB_Reactome	C2	CP:REACTOME	REACTOME_INTERLEUKIN_2_SIGNALING	12
MSigDB_Reactome	C2	CP:REACTOME	REACTOME_INTERLEUKIN_35_SIGNALLING	12
MSigDB_Reactome	C2	CP:REACTOME	REACTOME_INTERLEUKIN_37_SIGNALING	21
MSigDB_Reactome	C2	CP:REACTOME	REACTOME_INTERLEUKIN_3_INTERLEUKIN_5_AND_GM_CSF_SIGNALING	48
MSigDB_Reactome	C2	CP:REACTOME	REACTOME_INTERLEUKIN_4_AND_INTERLEUKIN_13_SIGNALING	111
MSigDB_Reactome	C2	CP:REACTOME	REACTOME_INTERLEUKIN_6_FAMILY_SIGNALING	24
MSigDB_Reactome	C2	CP:REACTOME	REACTOME_INTERLEUKIN_6_SIGNALING	11
MSigDB_Reactome	C2	CP:REACTOME	REACTOME_INTERLEUKIN_7_SIGNALING	36
MSigDB_Reactome	C2	CP:REACTOME	REACTOME_INTERLEUKIN_RECEPTOR_SHC_SIGNALING	27
MSigDB_Reactome	C2	CP:REACTOME	REACTOME_INTRAFLAGELLAR_TRANSPORT	54
MSigDB_Reactome	C2	CP:REACTOME	REACTOME_INTRA_GOLGI_AND_RETROGRADE_GOLGI_TO_ER_TRAFFIC	203
MSigDB_Reactome	C2	CP:REACTOME	REACTOME_INTRA_GOLGI_TRAFFIC	44
MSigDB_Reactome	C2	CP:REACTOME	REACTOME_INTRINSIC_PATHWAY_FOR_APOPTOSIS	55
MSigDB_Reactome	C2	CP:REACTOME	REACTOME_INTRINSIC_PATHWAY_OF_FIBRIN_CLOT_FORMATION	23
MSigDB_Reactome	C2	CP:REACTOME	REACTOME_INWARDLY_RECTIFYING_K_CHANNELS	35
MSigDB_Reactome	C2	CP:REACTOME	REACTOME_IONOTROPIC_ACTIVITY_OF_KAINATE_RECEPTORS	10
MSigDB_Reactome	C2	CP:REACTOME	REACTOME_ION_CHANNEL_TRANSPORT	183
MSigDB_Reactome	C2	CP:REACTOME	REACTOME_ION_HOMEOSTASIS	54
MSigDB_Reactome	C2	CP:REACTOME	REACTOME_ION_TRANSPORT_BY_P_TYPE_ATPASES	55
MSigDB_Reactome	C2	CP:REACTOME	REACTOME_IRAK1_RECRUITS_IKK_COMPLEX	14
MSigDB_Reactome	C2	CP:REACTOME	REACTOME_IRAK2_MEDIATED_ACTIVATION_OF_TAK1_COMPLEX	10
MSigDB_Reactome	C2	CP:REACTOME	REACTOME_IRAK4_DEFICIENCY_TLR2_4	18
MSigDB_Reactome	C2	CP:REACTOME	REACTOME_IRE1ALPHA_ACTIVATES_CHAPERONES	50
MSigDB_Reactome	C2	CP:REACTOME	REACTOME_IRF3_MEDIATED_INDUCTION_OF_TYPE_I_IFN	13
MSigDB_Reactome	C2	CP:REACTOME	REACTOME_IRON_UPTAKE_AND_TRANSPORT	58
MSigDB_Reactome	C2	CP:REACTOME	REACTOME_IRS_MEDIATED_SIGNALLING	48
MSigDB_Reactome	C2	CP:REACTOME	REACTOME_ISG15_ANTIVIRAL_MECHANISM	74
MSigDB_Reactome	C2	CP:REACTOME	REACTOME_JNK_C_JUN_KINASES_PHOSPHORYLATION_AND_ACTIVATION_MEDIATED_BY_ACTIVATED_HUMAN_TAK1	22
MSigDB_Reactome	C2	CP:REACTOME	REACTOME_JOSEPHIN_DOMAIN_DUBS	12
MSigDB_Reactome	C2	CP:REACTOME	REACTOME_KEAP1_NFE2L2_PATHWAY	112
MSigDB_Reactome	C2	CP:REACTOME	REACTOME_KERATAN_SULFATE_BIOSYNTHESIS	28
MSigDB_Reactome	C2	CP:REACTOME	REACTOME_KERATAN_SULFATE_DEGRADATION	15
MSigDB_Reactome	C2	CP:REACTOME	REACTOME_KERATAN_SULFATE_KERATIN_METABOLISM	36
MSigDB_Reactome	C2	CP:REACTOME	REACTOME_KERATINIZATION	217
MSigDB_Reactome	C2	CP:REACTOME	REACTOME_KETONE_BODY_METABOLISM	10
MSigDB_Reactome	C2	CP:REACTOME	REACTOME_KIDNEY_DEVELOPMENT	46
MSigDB_Reactome	C2	CP:REACTOME	REACTOME_KILLING_MECHANISMS	12
MSigDB_Reactome	C2	CP:REACTOME	REACTOME_KINESINS	61
MSigDB_Reactome	C2	CP:REACTOME	REACTOME_KSRP_KHSRP_BINDS_AND_DESTABILIZES_MRNA	17
MSigDB_Reactome	C2	CP:REACTOME	REACTOME_L1CAM_INTERACTIONS	121
MSigDB_Reactome	C2	CP:REACTOME	REACTOME_LAGGING_STRAND_SYNTHESIS	20
MSigDB_Reactome	C2	CP:REACTOME	REACTOME_LAMININ_INTERACTIONS	30
MSigDB_Reactome	C2	CP:REACTOME	REACTOME_LATE_ENDOSOMAL_MICROAUTOPHAGY	34
MSigDB_Reactome	C2	CP:REACTOME	REACTOME_LATE_SARS_COV_2_INFECTION_EVENTS	74
MSigDB_Reactome	C2	CP:REACTOME	REACTOME_LDL_CLEARANCE	19
MSigDB_Reactome	C2	CP:REACTOME	REACTOME_LEISHMANIA_INFECTION	218
MSigDB_Reactome	C2	CP:REACTOME	REACTOME_LGI_ADAM_INTERACTIONS	14
MSigDB_Reactome	C2	CP:REACTOME	REACTOME_LISTERIA_MONOCYTOGENES_ENTRY_INTO_HOST_CELLS	20
MSigDB_Reactome	C2	CP:REACTOME	REACTOME_LONG_TERM_POTENTIATION	23
MSigDB_Reactome	C2	CP:REACTOME	REACTOME_LOSS_OF_FUNCTION_OF_MECP2_IN_RETT_SYNDROME	13
MSigDB_Reactome	C2	CP:REACTOME	REACTOME_LYSINE_CATABOLISM	12
MSigDB_Reactome	C2	CP:REACTOME	REACTOME_LYSOSOME_VESICLE_BIOGENESIS	35
MSigDB_Reactome	C2	CP:REACTOME	REACTOME_LYSOSPHINGOLIPID_AND_LPA_RECEPTORS	14
MSigDB_Reactome	C2	CP:REACTOME	REACTOME_MAP2K_AND_MAPK_ACTIVATION	40
MSigDB_Reactome	C2	CP:REACTOME	REACTOME_MAP3K8_TPL2_DEPENDENT_MAPK1_3_ACTIVATION	16
MSigDB_Reactome	C2	CP:REACTOME	REACTOME_MAPK1_MAPK3_SIGNALING	271
MSigDB_Reactome	C2	CP:REACTOME	REACTOME_MAPK3_ERK1_ACTIVATION	10
MSigDB_Reactome	C2	CP:REACTOME	REACTOME_MAPK6_MAPK4_SIGNALING	80
MSigDB_Reactome	C2	CP:REACTOME	REACTOME_MAPK_TARGETS_NUCLEAR_EVENTS_MEDIATED_BY_MAP_KINASES	31
MSigDB_Reactome	C2	CP:REACTOME	REACTOME_MASTL_FACILITATES_MITOTIC_PROGRESSION	10
MSigDB_Reactome	C2	CP:REACTOME	REACTOME_MATERNAL_TO_ZYGOTIC_TRANSITION_MZT	128
MSigDB_Reactome	C2	CP:REACTOME	REACTOME_MATURATION_OF_SARS_COV_1_NUCLEOPROTEIN	11
MSigDB_Reactome	C2	CP:REACTOME	REACTOME_MATURATION_OF_SARS_COV_2_NUCLEOPROTEIN	15
MSigDB_Reactome	C2	CP:REACTOME	REACTOME_MATURATION_OF_SARS_COV_2_SPIKE_PROTEIN	41
MSigDB_Reactome	C2	CP:REACTOME	REACTOME_MATURATION_OF_TCA_ENZYMES_AND_REGULATION_OF_TCA_CYCLE	20
MSigDB_Reactome	C2	CP:REACTOME	REACTOME_MECHANICAL_LOAD_ACTIVATES_SIGNALING_BY_PIEZO1_AND_INTEGRINS_IN_OSTEOCYTES	17
MSigDB_Reactome	C2	CP:REACTOME	REACTOME_MECP2_REGULATES_NEURONAL_RECEPTORS_AND_CHANNELS	18
MSigDB_Reactome	C2	CP:REACTOME	REACTOME_MEIOSIS	120
MSigDB_Reactome	C2	CP:REACTOME	REACTOME_MEIOTIC_RECOMBINATION	88
MSigDB_Reactome	C2	CP:REACTOME	REACTOME_MEIOTIC_SYNAPSIS	78
MSigDB_Reactome	C2	CP:REACTOME	REACTOME_METABOLIC_DISORDERS_OF_BIOLOGICAL_OXIDATION_ENZYMES	34
MSigDB_Reactome	C2	CP:REACTOME	REACTOME_METABOLISM_OF_AMINE_DERIVED_HORMONES	18
MSigDB_Reactome	C2	CP:REACTOME	REACTOME_METABOLISM_OF_ANGIOTENSINOGEN_TO_ANGIOTENSINS	17
MSigDB_Reactome	C2	CP:REACTOME	REACTOME_METABOLISM_OF_CARBOHYDRATES_AND_CARBOHYDRATE_DERIVATIVES	288
MSigDB_Reactome	C2	CP:REACTOME	REACTOME_METABOLISM_OF_COFACTORS	25
MSigDB_Reactome	C2	CP:REACTOME	REACTOME_METABOLISM_OF_FAT_SOLUBLE_VITAMINS	48
MSigDB_Reactome	C2	CP:REACTOME	REACTOME_METABOLISM_OF_FOLATE_AND_PTERINES	17
MSigDB_Reactome	C2	CP:REACTOME	REACTOME_METABOLISM_OF_NITRIC_OXIDE_NOS3_ACTIVATION_AND_REGULATION	17
MSigDB_Reactome	C2	CP:REACTOME	REACTOME_METABOLISM_OF_NUCLEOTIDES	97
MSigDB_Reactome	C2	CP:REACTOME	REACTOME_METABOLISM_OF_POLYAMINES	46
MSigDB_Reactome	C2	CP:REACTOME	REACTOME_METABOLISM_OF_PORPHYRINS	27
MSigDB_Reactome	C2	CP:REACTOME	REACTOME_METABOLISM_OF_STEROIDS	154
MSigDB_Reactome	C2	CP:REACTOME	REACTOME_METABOLISM_OF_STEROID_HORMONES	36
MSigDB_Reactome	C2	CP:REACTOME	REACTOME_METABOLISM_OF_VITAMINS_AND_COFACTORS	196
MSigDB_Reactome	C2	CP:REACTOME	REACTOME_METABOLISM_OF_WATER_SOLUBLE_VITAMINS_AND_COFACTORS	125
MSigDB_Reactome	C2	CP:REACTOME	REACTOME_METALLOPROTEASE_DUBS	37
MSigDB_Reactome	C2	CP:REACTOME	REACTOME_METALLOTHIONEINS_BIND_METALS	11
MSigDB_Reactome	C2	CP:REACTOME	REACTOME_METAL_ION_SLC_TRANSPORTERS	24
MSigDB_Reactome	C2	CP:REACTOME	REACTOME_METHYLATION	14
MSigDB_Reactome	C2	CP:REACTOME	REACTOME_MET_ACTIVATES_PTK2_SIGNALING	30
MSigDB_Reactome	C2	CP:REACTOME	REACTOME_MET_ACTIVATES_RAP1_AND_RAC1	11
MSigDB_Reactome	C2	CP:REACTOME	REACTOME_MET_ACTIVATES_RAS_SIGNALING	11
MSigDB_Reactome	C2	CP:REACTOME	REACTOME_MET_PROMOTES_CELL_MOTILITY	41
MSigDB_Reactome	C2	CP:REACTOME	REACTOME_MET_RECEPTOR_RECYCLING	10
MSigDB_Reactome	C2	CP:REACTOME	REACTOME_MHC_CLASS_II_ANTIGEN_PRESENTATION	126
MSigDB_Reactome	C2	CP:REACTOME	REACTOME_MICRORNA_MIRNA_BIOGENESIS	25
MSigDB_Reactome	C2	CP:REACTOME	REACTOME_MISCELLANEOUS_SUBSTRATES	12
MSigDB_Reactome	C2	CP:REACTOME	REACTOME_MISCELLANEOUS_TRANSPORT_AND_BINDING_EVENTS	26
MSigDB_Reactome	C2	CP:REACTOME	REACTOME_MISMATCH_REPAIR	15
MSigDB_Reactome	C2	CP:REACTOME	REACTOME_MITF_M_DEPENDENT_GENE_EXPRESSION	110
MSigDB_Reactome	C2	CP:REACTOME	REACTOME_MITF_M_REGULATED_MELANOCYTE_DEVELOPMENT	161
MSigDB_Reactome	C2	CP:REACTOME	REACTOME_MITOCHONDRIAL_BIOGENESIS	96
MSigDB_Reactome	C2	CP:REACTOME	REACTOME_MITOCHONDRIAL_CALCIUM_ION_TRANSPORT	23
MSigDB_Reactome	C2	CP:REACTOME	REACTOME_MITOCHONDRIAL_FATTY_ACID_BETA_OXIDATION	37
MSigDB_Reactome	C2	CP:REACTOME	REACTOME_MITOCHONDRIAL_FATTY_ACID_BETA_OXIDATION_OF_SATURATED_FATTY_ACIDS	11
MSigDB_Reactome	C2	CP:REACTOME	REACTOME_MITOCHONDRIAL_IRON_SULFUR_CLUSTER_BIOGENESIS	13
MSigDB_Reactome	C2	CP:REACTOME	REACTOME_MITOCHONDRIAL_PROTEIN_DEGRADATION	98
MSigDB_Reactome	C2	CP:REACTOME	REACTOME_MITOCHONDRIAL_PROTEIN_IMPORT	65
MSigDB_Reactome	C2	CP:REACTOME	REACTOME_MITOCHONDRIAL_RNA_DEGRADATION	12
MSigDB_Reactome	C2	CP:REACTOME	REACTOME_MITOCHONDRIAL_TRANSLATION	96
MSigDB_Reactome	C2	CP:REACTOME	REACTOME_MITOCHONDRIAL_TRNA_AMINOACYLATION	21
MSigDB_Reactome	C2	CP:REACTOME	REACTOME_MITOCHONDRIAL_UNFOLDED_PROTEIN_RESPONSE_UPRMT	18
MSigDB_Reactome	C2	CP:REACTOME	REACTOME_MITOPHAGY	39
MSigDB_Reactome	C2	CP:REACTOME	REACTOME_MITOTIC_G1_PHASE_AND_G1_S_TRANSITION	139
MSigDB_Reactome	C2	CP:REACTOME	REACTOME_MITOTIC_G2_G2_M_PHASES	193
MSigDB_Reactome	C2	CP:REACTOME	REACTOME_MITOTIC_METAPHASE_AND_ANAPHASE	223
MSigDB_Reactome	C2	CP:REACTOME	REACTOME_MITOTIC_PROMETAPHASE	204
MSigDB_Reactome	C2	CP:REACTOME	REACTOME_MITOTIC_PROPHASE	142
MSigDB_Reactome	C2	CP:REACTOME	REACTOME_MITOTIC_SPINDLE_CHECKPOINT	111
MSigDB_Reactome	C2	CP:REACTOME	REACTOME_MITOTIC_TELOPHASE_CYTOKINESIS	13
MSigDB_Reactome	C2	CP:REACTOME	REACTOME_MODULATION_OF_HOST_RESPONSES_BY_IFN_STIMULATED_GENES	19
MSigDB_Reactome	C2	CP:REACTOME	REACTOME_MOLECULES_ASSOCIATED_WITH_ELASTIC_FIBRES	37
MSigDB_Reactome	C2	CP:REACTOME	REACTOME_MRNA_CAPPING	29
MSigDB_Reactome	C2	CP:REACTOME	REACTOME_MRNA_DECAY_BY_3_TO_5_EXORIBONUCLEASE	16
MSigDB_Reactome	C2	CP:REACTOME	REACTOME_MRNA_DECAY_BY_5_TO_3_EXORIBONUCLEASE	15
MSigDB_Reactome	C2	CP:REACTOME	REACTOME_MRNA_EDITING	10
MSigDB_Reactome	C2	CP:REACTOME	REACTOME_MRNA_SPLICING	212
MSigDB_Reactome	C2	CP:REACTOME	REACTOME_MRNA_SPLICING_MINOR_PATHWAY	50
MSigDB_Reactome	C2	CP:REACTOME	REACTOME_MTORC1_MEDIATED_SIGNALLING	24
MSigDB_Reactome	C2	CP:REACTOME	REACTOME_MTOR_SIGNALLING	41
MSigDB_Reactome	C2	CP:REACTOME	REACTOME_MUCOPOLYSACCHARIDOSES	11
MSigDB_Reactome	C2	CP:REACTOME	REACTOME_MUSCLE_CONTRACTION	203
MSigDB_Reactome	C2	CP:REACTOME	REACTOME_MYD88_INDEPENDENT_TLR4_CASCADE	109
MSigDB_Reactome	C2	CP:REACTOME	REACTOME_MYOGENESIS	29
MSigDB_Reactome	C2	CP:REACTOME	REACTOME_M_DECAY_DEGRADATION_OF_MATERNAL_MRNAS_BY_MATERNALLY_STORED_FACTORS	33
MSigDB_Reactome	C2	CP:REACTOME	REACTOME_NA_CL_DEPENDENT_NEUROTRANSMITTER_TRANSPORTERS	19
MSigDB_Reactome	C2	CP:REACTOME	REACTOME_NCAM1_INTERACTIONS	42
MSigDB_Reactome	C2	CP:REACTOME	REACTOME_NCAM_SIGNALING_FOR_NEURITE_OUT_GROWTH	63
MSigDB_Reactome	C2	CP:REACTOME	REACTOME_NEDDYLATION	232
MSigDB_Reactome	C2	CP:REACTOME	REACTOME_NEF_MEDIATED_DOWNREGULATION_OF_MHC_CLASS_I_COMPLEX_CELL_SURFACE_EXPRESSION	10
MSigDB_Reactome	C2	CP:REACTOME	REACTOME_NEF_MEDIATES_DOWN_MODULATION_OF_CELL_SURFACE_RECEPTORS_BY_RECRUITING_THEM_TO_CLATHRIN_ADAPTERS	21
MSigDB_Reactome	C2	CP:REACTOME	REACTOME_NEGATIVE_EPIGENETIC_REGULATION_OF_RRNA_EXPRESSION	108
MSigDB_Reactome	C2	CP:REACTOME	REACTOME_NEGATIVE_REGULATION_OF_ACTIVITY_OF_TFAP2_AP_2_FAMILY_TRANSCRIPTION_FACTORS	10
MSigDB_Reactome	C2	CP:REACTOME	REACTOME_NEGATIVE_REGULATION_OF_FGFR1_SIGNALING	33
MSigDB_Reactome	C2	CP:REACTOME	REACTOME_NEGATIVE_REGULATION_OF_FGFR2_SIGNALING	34
MSigDB_Reactome	C2	CP:REACTOME	REACTOME_NEGATIVE_REGULATION_OF_FGFR3_SIGNALING	29
MSigDB_Reactome	C2	CP:REACTOME	REACTOME_NEGATIVE_REGULATION_OF_FGFR4_SIGNALING	31
MSigDB_Reactome	C2	CP:REACTOME	REACTOME_NEGATIVE_REGULATION_OF_FLT3	15
MSigDB_Reactome	C2	CP:REACTOME	REACTOME_NEGATIVE_REGULATION_OF_MAPK_PATHWAY	43
MSigDB_Reactome	C2	CP:REACTOME	REACTOME_NEGATIVE_REGULATION_OF_MET_ACTIVITY	21
MSigDB_Reactome	C2	CP:REACTOME	REACTOME_NEGATIVE_REGULATION_OF_NMDA_RECEPTOR_MEDIATED_NEURONAL_TRANSMISSION	21
MSigDB_Reactome	C2	CP:REACTOME	REACTOME_NEGATIVE_REGULATION_OF_NOTCH4_SIGNALING	44
MSigDB_Reactome	C2	CP:REACTOME	REACTOME_NEGATIVE_REGULATION_OF_TCF_DEPENDENT_SIGNALING_BY_WNT_LIGAND_ANTAGONISTS	15
MSigDB_Reactome	C2	CP:REACTOME	REACTOME_NEGATIVE_REGULATION_OF_THE_PI3K_AKT_NETWORK	121
MSigDB_Reactome	C2	CP:REACTOME	REACTOME_NEGATIVE_REGULATORS_OF_DDX58_IFIH1_SIGNALING	35
MSigDB_Reactome	C2	CP:REACTOME	REACTOME_NEPHRIN_FAMILY_INTERACTIONS	23
MSigDB_Reactome	C2	CP:REACTOME	REACTOME_NEPHRON_DEVELOPMENT	13
MSigDB_Reactome	C2	CP:REACTOME	REACTOME_NETRIN_1_SIGNALING	44
MSigDB_Reactome	C2	CP:REACTOME	REACTOME_NEUREXINS_AND_NEUROLIGINS	56
MSigDB_Reactome	C2	CP:REACTOME	REACTOME_NEUROTOXICITY_OF_CLOSTRIDIUM_TOXINS	10
MSigDB_Reactome	C2	CP:REACTOME	REACTOME_NEUROTRANSMITTER_CLEARANCE	11
MSigDB_Reactome	C2	CP:REACTOME	REACTOME_NEUROTRANSMITTER_RECEPTORS_AND_POSTSYNAPTIC_SIGNAL_TRANSMISSION	205
MSigDB_Reactome	C2	CP:REACTOME	REACTOME_NEUROTRANSMITTER_RELEASE_CYCLE	51
MSigDB_Reactome	C2	CP:REACTOME	REACTOME_NFE2L2_REGULATING_ANTI_OXIDANT_DETOXIFICATION_ENZYMES	19
MSigDB_Reactome	C2	CP:REACTOME	REACTOME_NFE2L2_REGULATING_TUMORIGENIC_GENES	11
MSigDB_Reactome	C2	CP:REACTOME	REACTOME_NF_KB_ACTIVATION_THROUGH_FADD_RIP_1_PATHWAY_MEDIATED_BY_CASPASE_8_AND_10	13
MSigDB_Reactome	C2	CP:REACTOME	REACTOME_NF_KB_IS_ACTIVATED_AND_SIGNALS_SURVIVAL	13
MSigDB_Reactome	C2	CP:REACTOME	REACTOME_NGF_STIMULATED_TRANSCRIPTION	39
MSigDB_Reactome	C2	CP:REACTOME	REACTOME_NICOTINAMIDE_SALVAGE	16
MSigDB_Reactome	C2	CP:REACTOME	REACTOME_NICOTINATE_METABOLISM	29
MSigDB_Reactome	C2	CP:REACTOME	REACTOME_NITRIC_OXIDE_STIMULATES_GUANYLATE_CYCLASE	22
MSigDB_Reactome	C2	CP:REACTOME	REACTOME_NOD1_2_SIGNALING_PATHWAY	36
MSigDB_Reactome	C2	CP:REACTOME	REACTOME_NONHOMOLOGOUS_END_JOINING_NHEJ	68
MSigDB_Reactome	C2	CP:REACTOME	REACTOME_NONSENSE_MEDIATED_DECAY_NMD	116
MSigDB_Reactome	C2	CP:REACTOME	REACTOME_NON_INTEGRIN_MEMBRANE_ECM_INTERACTIONS	80
MSigDB_Reactome	C2	CP:REACTOME	REACTOME_NOREPINEPHRINE_NEUROTRANSMITTER_RELEASE_CYCLE	18
MSigDB_Reactome	C2	CP:REACTOME	REACTOME_NOTCH1_INTRACELLULAR_DOMAIN_REGULATES_TRANSCRIPTION	48
MSigDB_Reactome	C2	CP:REACTOME	REACTOME_NOTCH2_ACTIVATION_AND_TRANSMISSION_OF_SIGNAL_TO_THE_NUCLEUS	25
MSigDB_Reactome	C2	CP:REACTOME	REACTOME_NOTCH2_INTRACELLULAR_DOMAIN_REGULATES_TRANSCRIPTION	12
MSigDB_Reactome	C2	CP:REACTOME	REACTOME_NOTCH3_ACTIVATION_AND_TRANSMISSION_OF_SIGNAL_TO_THE_NUCLEUS	25
MSigDB_Reactome	C2	CP:REACTOME	REACTOME_NOTCH3_INTRACELLULAR_DOMAIN_REGULATES_TRANSCRIPTION	25
MSigDB_Reactome	C2	CP:REACTOME	REACTOME_NOTCH4_ACTIVATION_AND_TRANSMISSION_OF_SIGNAL_TO_THE_NUCLEUS	11
MSigDB_Reactome	C2	CP:REACTOME	REACTOME_NOTCH4_INTRACELLULAR_DOMAIN_REGULATES_TRANSCRIPTION	20
MSigDB_Reactome	C2	CP:REACTOME	REACTOME_NOTCH_HLH_TRANSCRIPTION_PATHWAY	28
MSigDB_Reactome	C2	CP:REACTOME	REACTOME_NPAS4_REGULATES_EXPRESSION_OF_TARGET_GENES	22
MSigDB_Reactome	C2	CP:REACTOME	REACTOME_NR1H2_AND_NR1H3_MEDIATED_SIGNALING	47
MSigDB_Reactome	C2	CP:REACTOME	REACTOME_NR1H3_NR1H2_REGULATE_GENE_EXPRESSION_LINKED_TO_CHOLESTEROL_TRANSPORT_AND_EFFLUX	37
MSigDB_Reactome	C2	CP:REACTOME	REACTOME_NRAGE_SIGNALS_DEATH_THROUGH_JNK	59
MSigDB_Reactome	C2	CP:REACTOME	REACTOME_NRIF_SIGNALS_CELL_DEATH_FROM_THE_NUCLEUS	16
MSigDB_Reactome	C2	CP:REACTOME	REACTOME_NS1_MEDIATED_EFFECTS_ON_HOST_PATHWAYS	41
MSigDB_Reactome	C2	CP:REACTOME	REACTOME_NUCLEAR_ENVELOPE_BREAKDOWN	53
MSigDB_Reactome	C2	CP:REACTOME	REACTOME_NUCLEAR_ENVELOPE_NE_REASSEMBLY	76
MSigDB_Reactome	C2	CP:REACTOME	REACTOME_NUCLEAR_EVENTS_KINASE_AND_TRANSCRIPTION_FACTOR_ACTIVATION	61
MSigDB_Reactome	C2	CP:REACTOME	REACTOME_NUCLEAR_EVENTS_MEDIATED_BY_NFE2L2	86
MSigDB_Reactome	C2	CP:REACTOME	REACTOME_NUCLEAR_EVENTS_STIMULATED_BY_ALK_SIGNALING_IN_CANCER	35
MSigDB_Reactome	C2	CP:REACTOME	REACTOME_NUCLEAR_IMPORT_OF_REV_PROTEIN	34
MSigDB_Reactome	C2	CP:REACTOME	REACTOME_NUCLEAR_PORE_COMPLEX_NPC_DISASSEMBLY	36
MSigDB_Reactome	C2	CP:REACTOME	REACTOME_NUCLEAR_RECEPTOR_TRANSCRIPTION_PATHWAY	53
MSigDB_Reactome	C2	CP:REACTOME	REACTOME_NUCLEAR_RNA_DECAY	35
MSigDB_Reactome	C2	CP:REACTOME	REACTOME_NUCLEAR_SIGNALING_BY_ERBB4	32
MSigDB_Reactome	C2	CP:REACTOME	REACTOME_NUCLEOTIDE_BINDING_DOMAIN_LEUCINE_RICH_REPEAT_CONTAINING_RECEPTOR_NLR_SIGNALING_PATHWAYS	56
MSigDB_Reactome	C2	CP:REACTOME	REACTOME_NUCLEOTIDE_BIOSYNTHESIS	14
MSigDB_Reactome	C2	CP:REACTOME	REACTOME_NUCLEOTIDE_CATABOLISM	35
MSigDB_Reactome	C2	CP:REACTOME	REACTOME_NUCLEOTIDE_EXCISION_REPAIR	108
MSigDB_Reactome	C2	CP:REACTOME	REACTOME_NUCLEOTIDE_LIKE_PURINERGIC_RECEPTORS	16
MSigDB_Reactome	C2	CP:REACTOME	REACTOME_NUCLEOTIDE_SALVAGE	23
MSigDB_Reactome	C2	CP:REACTOME	REACTOME_N_GLYCAN_ANTENNAE_ELONGATION	15
MSigDB_Reactome	C2	CP:REACTOME	REACTOME_N_GLYCAN_ANTENNAE_ELONGATION_IN_THE_MEDIAL_TRANS_GOLGI	26
MSigDB_Reactome	C2	CP:REACTOME	REACTOME_N_GLYCAN_TRIMMING_IN_THE_ER_AND_CALNEXIN_CALRETICULIN_CYCLE	35
MSigDB_Reactome	C2	CP:REACTOME	REACTOME_ONCOGENE_INDUCED_SENESCENCE	35
MSigDB_Reactome	C2	CP:REACTOME	REACTOME_ONCOGENIC_MAPK_SIGNALING	82
MSigDB_Reactome	C2	CP:REACTOME	REACTOME_OPIOID_SIGNALLING	90
MSigDB_Reactome	C2	CP:REACTOME	REACTOME_ORC1_REMOVAL_FROM_CHROMATIN	58
MSigDB_Reactome	C2	CP:REACTOME	REACTOME_ORGANELLE_BIOGENESIS_AND_MAINTENANCE	297
MSigDB_Reactome	C2	CP:REACTOME	REACTOME_ORGANIC_ANION_TRANSPORTERS	12
MSigDB_Reactome	C2	CP:REACTOME	REACTOME_ORGANIC_CATION_ANION_ZWITTERION_TRANSPORT	15
MSigDB_Reactome	C2	CP:REACTOME	REACTOME_ORGANIC_CATION_TRANSPORT	10
MSigDB_Reactome	C2	CP:REACTOME	REACTOME_OTHER_INTERLEUKIN_SIGNALING	24
MSigDB_Reactome	C2	CP:REACTOME	REACTOME_OTHER_SEMAPHORIN_INTERACTIONS	19
MSigDB_Reactome	C2	CP:REACTOME	REACTOME_OVARIAN_TUMOR_DOMAIN_PROTEASES	39
MSigDB_Reactome	C2	CP:REACTOME	REACTOME_OXIDATIVE_STRESS_INDUCED_SENESCENCE	125
MSigDB_Reactome	C2	CP:REACTOME	REACTOME_O_GLYCOSYLATION_OF_TSR_DOMAIN_CONTAINING_PROTEINS	39
MSigDB_Reactome	C2	CP:REACTOME	REACTOME_O_LINKED_GLYCOSYLATION	116
MSigDB_Reactome	C2	CP:REACTOME	REACTOME_O_LINKED_GLYCOSYLATION_OF_MUCINS	62
MSigDB_Reactome	C2	CP:REACTOME	REACTOME_P130CAS_LINKAGE_TO_MAPK_SIGNALING_FOR_INTEGRINS	15
MSigDB_Reactome	C2	CP:REACTOME	REACTOME_P2Y_RECEPTORS	12
MSigDB_Reactome	C2	CP:REACTOME	REACTOME_P38MAPK_EVENTS	13
MSigDB_Reactome	C2	CP:REACTOME	REACTOME_P75NTR_RECRUITS_SIGNALLING_COMPLEXES	13
MSigDB_Reactome	C2	CP:REACTOME	REACTOME_P75NTR_REGULATES_AXONOGENESIS	10
MSigDB_Reactome	C2	CP:REACTOME	REACTOME_P75NTR_SIGNALS_VIA_NF_KB	16
MSigDB_Reactome	C2	CP:REACTOME	REACTOME_P75_NTR_RECEPTOR_MEDIATED_SIGNALLING	97
MSigDB_Reactome	C2	CP:REACTOME	REACTOME_PARACETAMOL_ADME	29
MSigDB_Reactome	C2	CP:REACTOME	REACTOME_PARASITE_INFECTION	116
MSigDB_Reactome	C2	CP:REACTOME	REACTOME_PASSIVE_TRANSPORT_BY_AQUAPORINS	13
MSigDB_Reactome	C2	CP:REACTOME	REACTOME_PCNA_DEPENDENT_LONG_PATCH_BASE_EXCISION_REPAIR	21
MSigDB_Reactome	C2	CP:REACTOME	REACTOME_PCP_CE_PATHWAY	79
MSigDB_Reactome	C2	CP:REACTOME	REACTOME_PECAM1_INTERACTIONS	12
MSigDB_Reactome	C2	CP:REACTOME	REACTOME_PENTOSE_PHOSPHATE_PATHWAY	15
MSigDB_Reactome	C2	CP:REACTOME	REACTOME_PEPTIDE_HORMONE_BIOSYNTHESIS	14
MSigDB_Reactome	C2	CP:REACTOME	REACTOME_PEPTIDE_HORMONE_METABOLISM	88
MSigDB_Reactome	C2	CP:REACTOME	REACTOME_PEPTIDE_LIGAND_BINDING_RECEPTORS	197
MSigDB_Reactome	C2	CP:REACTOME	REACTOME_PERK_REGULATES_GENE_EXPRESSION	32
MSigDB_Reactome	C2	CP:REACTOME	REACTOME_PEROXISOMAL_LIPID_METABOLISM	28
MSigDB_Reactome	C2	CP:REACTOME	REACTOME_PEROXISOMAL_PROTEIN_IMPORT	63
MSigDB_Reactome	C2	CP:REACTOME	REACTOME_PEXOPHAGY	11
MSigDB_Reactome	C2	CP:REACTOME	REACTOME_PHASE_0_RAPID_DEPOLARISATION	32
MSigDB_Reactome	C2	CP:REACTOME	REACTOME_PHASE_2_PLATEAU_PHASE	15
MSigDB_Reactome	C2	CP:REACTOME	REACTOME_PHASE_4_RESTING_MEMBRANE_POTENTIAL	19
MSigDB_Reactome	C2	CP:REACTOME	REACTOME_PHASE_II_CONJUGATION_OF_COMPOUNDS	111
MSigDB_Reactome	C2	CP:REACTOME	REACTOME_PHASE_I_FUNCTIONALIZATION_OF_COMPOUNDS	104
MSigDB_Reactome	C2	CP:REACTOME	REACTOME_PHENYLALANINE_AND_TYROSINE_METABOLISM	11
MSigDB_Reactome	C2	CP:REACTOME	REACTOME_PHOSPHOLIPASE_C_MEDIATED_CASCADE_FGFR1	16
MSigDB_Reactome	C2	CP:REACTOME	REACTOME_PHOSPHOLIPASE_C_MEDIATED_CASCADE_FGFR2	18
MSigDB_Reactome	C2	CP:REACTOME	REACTOME_PHOSPHOLIPASE_C_MEDIATED_CASCADE_FGFR4	15
MSigDB_Reactome	C2	CP:REACTOME	REACTOME_PHOSPHOLIPID_METABOLISM	212
MSigDB_Reactome	C2	CP:REACTOME	REACTOME_PHOSPHORYLATED_BMAL1_CLOCK_ARNTL_CLOCK_ACTIVATES_EXPRESSION_OF_CORE_CLOCK_GENES	22
MSigDB_Reactome	C2	CP:REACTOME	REACTOME_PHOSPHORYLATION_AND_NUCLEAR_TRANSLOCATION_OF_THE_CRY_PER_KINASE_COMPLEX	14
MSigDB_Reactome	C2	CP:REACTOME	REACTOME_PHOSPHORYLATION_OF_CLOCK_ACETYLATION_OF_BMAL1_ARNTL_AT_TARGET_GENE_PROMOTERS	11
MSigDB_Reactome	C2	CP:REACTOME	REACTOME_PHOSPHORYLATION_OF_THE_APC_C	20
MSigDB_Reactome	C2	CP:REACTOME	REACTOME_PHYSIOLOGICAL_FACTORS	14
MSigDB_Reactome	C2	CP:REACTOME	REACTOME_PI3K_AKT_SIGNALING_IN_CANCER	113
MSigDB_Reactome	C2	CP:REACTOME	REACTOME_PI3K_EVENTS_IN_ERBB2_SIGNALING	16
MSigDB_Reactome	C2	CP:REACTOME	REACTOME_PI3K_EVENTS_IN_ERBB4_SIGNALING	10
MSigDB_Reactome	C2	CP:REACTOME	REACTOME_PINK1_PRKN_MEDIATED_MITOPHAGY	32
MSigDB_Reactome	C2	CP:REACTOME	REACTOME_PIWI_INTERACTING_RNA_PIRNA_BIOGENESIS	29
MSigDB_Reactome	C2	CP:REACTOME	REACTOME_PI_3K_CASCADE_FGFR1	21
MSigDB_Reactome	C2	CP:REACTOME	REACTOME_PI_3K_CASCADE_FGFR2	23
MSigDB_Reactome	C2	CP:REACTOME	REACTOME_PI_3K_CASCADE_FGFR3	18
MSigDB_Reactome	C2	CP:REACTOME	REACTOME_PI_3K_CASCADE_FGFR4	20
MSigDB_Reactome	C2	CP:REACTOME	REACTOME_PI_METABOLISM	84
MSigDB_Reactome	C2	CP:REACTOME	REACTOME_PKA_ACTIVATION_IN_GLUCAGON_SIGNALLING	17
MSigDB_Reactome	C2	CP:REACTOME	REACTOME_PKA_MEDIATED_PHOSPHORYLATION_OF_CREB	20
MSigDB_Reactome	C2	CP:REACTOME	REACTOME_PKMTS_METHYLATE_HISTONE_LYSINES	70
MSigDB_Reactome	C2	CP:REACTOME	REACTOME_PKR_MEDIATED_SIGNALING	76
MSigDB_Reactome	C2	CP:REACTOME	REACTOME_PLASMA_LIPOPROTEIN_ASSEMBLY	19
MSigDB_Reactome	C2	CP:REACTOME	REACTOME_PLASMA_LIPOPROTEIN_ASSEMBLY_REMODELING_AND_CLEARANCE	75
MSigDB_Reactome	C2	CP:REACTOME	REACTOME_PLASMA_LIPOPROTEIN_CLEARANCE	37
MSigDB_Reactome	C2	CP:REACTOME	REACTOME_PLASMA_LIPOPROTEIN_REMODELING	34
MSigDB_Reactome	C2	CP:REACTOME	REACTOME_PLATELET_ACTIVATION_SIGNALING_AND_AGGREGATION	261
MSigDB_Reactome	C2	CP:REACTOME	REACTOME_PLATELET_ADHESION_TO_EXPOSED_COLLAGEN	16
MSigDB_Reactome	C2	CP:REACTOME	REACTOME_PLATELET_AGGREGATION_PLUG_FORMATION	39
MSigDB_Reactome	C2	CP:REACTOME	REACTOME_PLATELET_CALCIUM_HOMEOSTASIS	28
MSigDB_Reactome	C2	CP:REACTOME	REACTOME_PLATELET_HOMEOSTASIS	86
MSigDB_Reactome	C2	CP:REACTOME	REACTOME_PLATELET_SENSITIZATION_BY_LDL	17
MSigDB_Reactome	C2	CP:REACTOME	REACTOME_POLO_LIKE_KINASE_MEDIATED_EVENTS	16
MSigDB_Reactome	C2	CP:REACTOME	REACTOME_POLYMERASE_SWITCHING	14
MSigDB_Reactome	C2	CP:REACTOME	REACTOME_POLYMERASE_SWITCHING_ON_THE_C_STRAND_OF_THE_TELOMERE	26
MSigDB_Reactome	C2	CP:REACTOME	REACTOME_POSITIVE_EPIGENETIC_REGULATION_OF_RRNA_EXPRESSION	105
MSigDB_Reactome	C2	CP:REACTOME	REACTOME_POSTMITOTIC_NUCLEAR_PORE_COMPLEX_NPC_REFORMATION	27
MSigDB_Reactome	C2	CP:REACTOME	REACTOME_POST_CHAPERONIN_TUBULIN_FOLDING_PATHWAY	23
MSigDB_Reactome	C2	CP:REACTOME	REACTOME_POST_TRANSLATIONAL_MODIFICATION_SYNTHESIS_OF_GPI_ANCHORED_PROTEINS	93
MSigDB_Reactome	C2	CP:REACTOME	REACTOME_POTASSIUM_CHANNELS	103
MSigDB_Reactome	C2	CP:REACTOME	REACTOME_POTENTIAL_THERAPEUTICS_FOR_SARS	154
MSigDB_Reactome	C2	CP:REACTOME	REACTOME_POU5F1_OCT4_SOX2_NANOG_ACTIVATE_GENES_RELATED_TO_PROLIFERATION	13
MSigDB_Reactome	C2	CP:REACTOME	REACTOME_POU5F1_OCT4_SOX2_NANOG_REPRESS_GENES_RELATED_TO_DIFFERENTIATION	10
MSigDB_Reactome	C2	CP:REACTOME	REACTOME_PRC2_METHYLATES_HISTONES_AND_DNA	72
MSigDB_Reactome	C2	CP:REACTOME	REACTOME_PREDNISONE_ADME	10
MSigDB_Reactome	C2	CP:REACTOME	REACTOME_PREGNENOLONE_BIOSYNTHESIS	12
MSigDB_Reactome	C2	CP:REACTOME	REACTOME_PRESYNAPTIC_DEPOLARIZATION_AND_CALCIUM_CHANNEL_OPENING	11
MSigDB_Reactome	C2	CP:REACTOME	REACTOME_PRESYNAPTIC_FUNCTION_OF_KAINATE_RECEPTORS	21
MSigDB_Reactome	C2	CP:REACTOME	REACTOME_PRESYNAPTIC_NICOTINIC_ACETYLCHOLINE_RECEPTORS	12
MSigDB_Reactome	C2	CP:REACTOME	REACTOME_PRE_NOTCH_EXPRESSION_AND_PROCESSING	124
MSigDB_Reactome	C2	CP:REACTOME	REACTOME_PRE_NOTCH_PROCESSING_IN_GOLGI	18
MSigDB_Reactome	C2	CP:REACTOME	REACTOME_PROCESSING_AND_ACTIVATION_OF_SUMO	10
MSigDB_Reactome	C2	CP:REACTOME	REACTOME_PROCESSING_OF_CAPPED_INTRONLESS_PRE_MRNA	29
MSigDB_Reactome	C2	CP:REACTOME	REACTOME_PROCESSING_OF_CAPPED_INTRON_CONTAINING_PRE_MRNA	283
MSigDB_Reactome	C2	CP:REACTOME	REACTOME_PROCESSING_OF_DNA_DOUBLE_STRAND_BREAK_ENDS	97
MSigDB_Reactome	C2	CP:REACTOME	REACTOME_PROCESSING_OF_INTRONLESS_PRE_MRNAS	20
MSigDB_Reactome	C2	CP:REACTOME	REACTOME_PROCESSING_OF_SMDT1	16
MSigDB_Reactome	C2	CP:REACTOME	REACTOME_PROCESSIVE_SYNTHESIS_ON_THE_C_STRAND_OF_THE_TELOMERE	19
MSigDB_Reactome	C2	CP:REACTOME	REACTOME_PROCESSIVE_SYNTHESIS_ON_THE_LAGGING_STRAND	15
MSigDB_Reactome	C2	CP:REACTOME	REACTOME_PROGRAMMED_CELL_DEATH	198
MSigDB_Reactome	C2	CP:REACTOME	REACTOME_PROLACTIN_RECEPTOR_SIGNALING	15
MSigDB_Reactome	C2	CP:REACTOME	REACTOME_PROLONGED_ERK_ACTIVATION_EVENTS	14
MSigDB_Reactome	C2	CP:REACTOME	REACTOME_PROSTACYCLIN_SIGNALLING_THROUGH_PROSTACYCLIN_RECEPTOR	19
MSigDB_Reactome	C2	CP:REACTOME	REACTOME_PROTEASOME_ASSEMBLY	52
MSigDB_Reactome	C2	CP:REACTOME	REACTOME_PROTEIN_FOLDING	98
MSigDB_Reactome	C2	CP:REACTOME	REACTOME_PROTEIN_HYDROXYLATION	20
MSigDB_Reactome	C2	CP:REACTOME	REACTOME_PROTEIN_LIPOYLATION	10
MSigDB_Reactome	C2	CP:REACTOME	REACTOME_PROTEIN_LOCALIZATION	164
MSigDB_Reactome	C2	CP:REACTOME	REACTOME_PROTEIN_METHYLATION	17
MSigDB_Reactome	C2	CP:REACTOME	REACTOME_PROTEIN_PROTEIN_INTERACTIONS_AT_SYNAPSES	87
MSigDB_Reactome	C2	CP:REACTOME	REACTOME_PROTEIN_UBIQUITINATION	79
MSigDB_Reactome	C2	CP:REACTOME	REACTOME_PTEN_REGULATION	126
MSigDB_Reactome	C2	CP:REACTOME	REACTOME_PTK6_REGULATES_RHO_GTPASES_RAS_GTPASE_AND_MAP_KINASES	14
MSigDB_Reactome	C2	CP:REACTOME	REACTOME_PURINERGIC_SIGNALING_IN_LEISHMANIASIS_INFECTION	26
MSigDB_Reactome	C2	CP:REACTOME	REACTOME_PURINE_CATABOLISM	17
MSigDB_Reactome	C2	CP:REACTOME	REACTOME_PURINE_RIBONUCLEOSIDE_MONOPHOSPHATE_BIOSYNTHESIS	11
MSigDB_Reactome	C2	CP:REACTOME	REACTOME_PURINE_SALVAGE	13
MSigDB_Reactome	C2	CP:REACTOME	REACTOME_PYRIMIDINE_CATABOLISM	12
MSigDB_Reactome	C2	CP:REACTOME	REACTOME_PYRIMIDINE_SALVAGE	11
MSigDB_Reactome	C2	CP:REACTOME	REACTOME_PYROPTOSIS	27
MSigDB_Reactome	C2	CP:REACTOME	REACTOME_PYRUVATE_METABOLISM	49
MSigDB_Reactome	C2	CP:REACTOME	REACTOME_RAB_GEFS_EXCHANGE_GTP_FOR_GDP_ON_RABS	90
MSigDB_Reactome	C2	CP:REACTOME	REACTOME_RAB_GERANYLGERANYLATION	65
MSigDB_Reactome	C2	CP:REACTOME	REACTOME_RAB_REGULATION_OF_TRAFFICKING	122
MSigDB_Reactome	C2	CP:REACTOME	REACTOME_RAC1_GTPASE_CYCLE	184
MSigDB_Reactome	C2	CP:REACTOME	REACTOME_RAC2_GTPASE_CYCLE	88
MSigDB_Reactome	C2	CP:REACTOME	REACTOME_RAC3_GTPASE_CYCLE	94
MSigDB_Reactome	C2	CP:REACTOME	REACTOME_RAF_ACTIVATION	34
MSigDB_Reactome	C2	CP:REACTOME	REACTOME_RAF_INDEPENDENT_MAPK1_3_ACTIVATION	23
MSigDB_Reactome	C2	CP:REACTOME	REACTOME_RAP1_SIGNALLING	16
MSigDB_Reactome	C2	CP:REACTOME	REACTOME_RAS_ACTIVATION_UPON_CA2_INFLUX_THROUGH_NMDA_RECEPTOR	20
MSigDB_Reactome	C2	CP:REACTOME	REACTOME_RAS_PROCESSING	24
MSigDB_Reactome	C2	CP:REACTOME	REACTOME_RA_BIOSYNTHESIS_PATHWAY	22
MSigDB_Reactome	C2	CP:REACTOME	REACTOME_REACTIONS_SPECIFIC_TO_THE_COMPLEX_N_GLYCAN_SYNTHESIS_PATHWAY	10
MSigDB_Reactome	C2	CP:REACTOME	REACTOME_RECEPTOR_MEDIATED_MITOPHAGY	11
MSigDB_Reactome	C2	CP:REACTOME	REACTOME_RECEPTOR_TYPE_TYROSINE_PROTEIN_PHOSPHATASES	20
MSigDB_Reactome	C2	CP:REACTOME	REACTOME_RECOGNITION_AND_ASSOCIATION_OF_DNA_GLYCOSYLASE_WITH_SITE_CONTAINING_AN_AFFECTED_PURINE	55
MSigDB_Reactome	C2	CP:REACTOME	REACTOME_RECOGNITION_OF_DNA_DAMAGE_BY_PCNA_CONTAINING_REPLICATION_COMPLEX	30
MSigDB_Reactome	C2	CP:REACTOME	REACTOME_RECRUITMENT_OF_MITOTIC_CENTROSOME_PROTEINS_AND_COMPLEXES	81
MSigDB_Reactome	C2	CP:REACTOME	REACTOME_RECRUITMENT_OF_NUMA_TO_MITOTIC_CENTROSOMES	95
MSigDB_Reactome	C2	CP:REACTOME	REACTOME_RECYCLING_OF_BILE_ACIDS_AND_SALTS	18
MSigDB_Reactome	C2	CP:REACTOME	REACTOME_RECYCLING_PATHWAY_OF_L1	49
MSigDB_Reactome	C2	CP:REACTOME	REACTOME_REDUCTION_OF_CYTOSOLIC_CA_LEVELS	12
MSigDB_Reactome	C2	CP:REACTOME	REACTOME_REGULATED_NECROSIS	59
MSigDB_Reactome	C2	CP:REACTOME	REACTOME_REGULATED_PROTEOLYSIS_OF_P75NTR	11
MSigDB_Reactome	C2	CP:REACTOME	REACTOME_REGULATION_BY_C_FLIP	11
MSigDB_Reactome	C2	CP:REACTOME	REACTOME_REGULATION_OF_APOPTOSIS	40
MSigDB_Reactome	C2	CP:REACTOME	REACTOME_REGULATION_OF_BACH1_ACTIVITY	11
MSigDB_Reactome	C2	CP:REACTOME	REACTOME_REGULATION_OF_BETA_CELL_DEVELOPMENT	42
MSigDB_Reactome	C2	CP:REACTOME	REACTOME_REGULATION_OF_CDH11_FUNCTION	11
MSigDB_Reactome	C2	CP:REACTOME	REACTOME_REGULATION_OF_CDH11_GENE_TRANSCRIPTION	10
MSigDB_Reactome	C2	CP:REACTOME	REACTOME_REGULATION_OF_CDH11_MRNA_TRANSLATION_BY_MICRORNAS	10
MSigDB_Reactome	C2	CP:REACTOME	REACTOME_REGULATION_OF_CHOLESTEROL_BIOSYNTHESIS_BY_SREBP_SREBF	55
MSigDB_Reactome	C2	CP:REACTOME	REACTOME_REGULATION_OF_COMMISSURAL_AXON_PATHFINDING_BY_SLIT_AND_ROBO	10
MSigDB_Reactome	C2	CP:REACTOME	REACTOME_REGULATION_OF_ENDOGENOUS_RETROELEMENTS	142
MSigDB_Reactome	C2	CP:REACTOME	REACTOME_REGULATION_OF_ENDOGENOUS_RETROELEMENTS_BY_KRAB_ZFP_PROTEINS	107
MSigDB_Reactome	C2	CP:REACTOME	REACTOME_REGULATION_OF_ENDOGENOUS_RETROELEMENTS_BY_PIWI_INTERACTING_RNAS_PIRNAS	97
MSigDB_Reactome	C2	CP:REACTOME	REACTOME_REGULATION_OF_ENDOGENOUS_RETROELEMENTS_BY_THE_HUMAN_SILENCING_HUB_HUSH_COMPLEX	70
MSigDB_Reactome	C2	CP:REACTOME	REACTOME_REGULATION_OF_EXPRESSION_OF_SLITS_AND_ROBOS	159
MSigDB_Reactome	C2	CP:REACTOME	REACTOME_REGULATION_OF_FOXO_TRANSCRIPTIONAL_ACTIVITY_BY_ACETYLATION	10
MSigDB_Reactome	C2	CP:REACTOME	REACTOME_REGULATION_OF_FZD_BY_UBIQUITINATION	21
MSigDB_Reactome	C2	CP:REACTOME	REACTOME_REGULATION_OF_GENE_EXPRESSION_BY_HYPOXIA_INDUCIBLE_FACTOR	11
MSigDB_Reactome	C2	CP:REACTOME	REACTOME_REGULATION_OF_GENE_EXPRESSION_IN_BETA_CELLS	21
MSigDB_Reactome	C2	CP:REACTOME	REACTOME_REGULATION_OF_GENE_EXPRESSION_IN_LATE_STAGE_BRANCHING_MORPHOGENESIS_PANCREATIC_BUD_PRECURSOR_CELLS	16
MSigDB_Reactome	C2	CP:REACTOME	REACTOME_REGULATION_OF_GLUCOKINASE_BY_GLUCOKINASE_REGULATORY_PROTEIN	32
MSigDB_Reactome	C2	CP:REACTOME	REACTOME_REGULATION_OF_GLYCOLYSIS_BY_FRUCTOSE_2_6_BISPHOSPHATE_METABOLISM	12
MSigDB_Reactome	C2	CP:REACTOME	REACTOME_REGULATION_OF_HOMOTYPIC_CELL_CELL_ADHESION	32
MSigDB_Reactome	C2	CP:REACTOME	REACTOME_REGULATION_OF_HSF1_MEDIATED_HEAT_SHOCK_RESPONSE	82
MSigDB_Reactome	C2	CP:REACTOME	REACTOME_REGULATION_OF_IFNA_IFNB_SIGNALING	26
MSigDB_Reactome	C2	CP:REACTOME	REACTOME_REGULATION_OF_IFNG_SIGNALING	14
MSigDB_Reactome	C2	CP:REACTOME	REACTOME_REGULATION_OF_INNATE_IMMUNE_RESPONSES_TO_CYTOSOLIC_DNA	15
MSigDB_Reactome	C2	CP:REACTOME	REACTOME_REGULATION_OF_INSULIN_LIKE_GROWTH_FACTOR_IGF_TRANSPORT_AND_UPTAKE_BY_INSULIN_LIKE_GROWTH_FACTOR_BINDING_PROTEINS_IGFBPS	124
MSigDB_Reactome	C2	CP:REACTOME	REACTOME_REGULATION_OF_INSULIN_SECRETION	78
MSigDB_Reactome	C2	CP:REACTOME	REACTOME_REGULATION_OF_KIT_SIGNALING	16
MSigDB_Reactome	C2	CP:REACTOME	REACTOME_REGULATION_OF_LIPID_METABOLISM_BY_PPARALPHA	118
MSigDB_Reactome	C2	CP:REACTOME	REACTOME_REGULATION_OF_LOCALIZATION_OF_FOXO_TRANSCRIPTION_FACTORS	12
MSigDB_Reactome	C2	CP:REACTOME	REACTOME_REGULATION_OF_MECP2_EXPRESSION_AND_ACTIVITY	32
MSigDB_Reactome	C2	CP:REACTOME	REACTOME_REGULATION_OF_MITF_M_DEPENDENT_GENES_INVOLVED_IN_APOPTOSIS	19
MSigDB_Reactome	C2	CP:REACTOME	REACTOME_REGULATION_OF_MITF_M_DEPENDENT_GENES_INVOLVED_IN_CELL_CYCLE_AND_PROLIFERATION	18
MSigDB_Reactome	C2	CP:REACTOME	REACTOME_REGULATION_OF_MITF_M_DEPENDENT_GENES_INVOLVED_IN_EXTRACELLULAR_MATRIX_FOCAL_ADHESION_AND_EPITHELIAL_TO_MESENCHYMAL_TRANSITION	12
MSigDB_Reactome	C2	CP:REACTOME	REACTOME_REGULATION_OF_MITF_M_DEPENDENT_GENES_INVOLVED_IN_LYSOSOME_BIOGENESIS_AND_AUTOPHAGY	17
MSigDB_Reactome	C2	CP:REACTOME	REACTOME_REGULATION_OF_MITF_M_DEPENDENT_GENES_INVOLVED_IN_PIGMENTATION	42
MSigDB_Reactome	C2	CP:REACTOME	REACTOME_REGULATION_OF_MRNA_STABILITY_BY_PROTEINS_THAT_BIND_AU_RICH_ELEMENTS	74
MSigDB_Reactome	C2	CP:REACTOME	REACTOME_REGULATION_OF_NF_KAPPA_B_SIGNALING	18
MSigDB_Reactome	C2	CP:REACTOME	REACTOME_REGULATION_OF_NPAS4_GENE_EXPRESSION	13
MSigDB_Reactome	C2	CP:REACTOME	REACTOME_REGULATION_OF_ORNITHINE_DECARBOXYLASE_ODC	38
MSigDB_Reactome	C2	CP:REACTOME	REACTOME_REGULATION_OF_PLK1_ACTIVITY_AT_G2_M_TRANSITION	87
MSigDB_Reactome	C2	CP:REACTOME	REACTOME_REGULATION_OF_PTEN_GENE_TRANSCRIPTION	61
MSigDB_Reactome	C2	CP:REACTOME	REACTOME_REGULATION_OF_PTEN_STABILITY_AND_ACTIVITY	56
MSigDB_Reactome	C2	CP:REACTOME	REACTOME_REGULATION_OF_PYRUVATE_DEHYDROGENASE_PDH_COMPLEX	15
MSigDB_Reactome	C2	CP:REACTOME	REACTOME_REGULATION_OF_PYRUVATE_METABOLISM	33
MSigDB_Reactome	C2	CP:REACTOME	REACTOME_REGULATION_OF_RAS_BY_GAPS	55
MSigDB_Reactome	C2	CP:REACTOME	REACTOME_REGULATION_OF_RUNX1_EXPRESSION_AND_ACTIVITY	17
MSigDB_Reactome	C2	CP:REACTOME	REACTOME_REGULATION_OF_RUNX2_EXPRESSION_AND_ACTIVITY	59
MSigDB_Reactome	C2	CP:REACTOME	REACTOME_REGULATION_OF_RUNX3_EXPRESSION_AND_ACTIVITY	45
MSigDB_Reactome	C2	CP:REACTOME	REACTOME_REGULATION_OF_SIGNALING_BY_CBL	22
MSigDB_Reactome	C2	CP:REACTOME	REACTOME_REGULATION_OF_SIGNALING_BY_NODAL	12
MSigDB_Reactome	C2	CP:REACTOME	REACTOME_REGULATION_OF_TBK1_IKK_IKBKE_MEDIATED_ACTIVATION_OF_IRF3_IRF7	14
MSigDB_Reactome	C2	CP:REACTOME	REACTOME_REGULATION_OF_TBK1_IKK_MEDIATED_ACTIVATION_OF_IRF3_IRF7_UPON_TLR3_LIGATION	11
MSigDB_Reactome	C2	CP:REACTOME	REACTOME_REGULATION_OF_TLR_BY_ENDOGENOUS_LIGAND	22
MSigDB_Reactome	C2	CP:REACTOME	REACTOME_REGULATION_OF_TP53_ACTIVITY	160
MSigDB_Reactome	C2	CP:REACTOME	REACTOME_REGULATION_OF_TP53_ACTIVITY_THROUGH_ACETYLATION	30
MSigDB_Reactome	C2	CP:REACTOME	REACTOME_REGULATION_OF_TP53_ACTIVITY_THROUGH_ASSOCIATION_WITH_CO_FACTORS	14
MSigDB_Reactome	C2	CP:REACTOME	REACTOME_REGULATION_OF_TP53_ACTIVITY_THROUGH_METHYLATION	19
MSigDB_Reactome	C2	CP:REACTOME	REACTOME_REGULATION_OF_TP53_ACTIVITY_THROUGH_PHOSPHORYLATION	92
MSigDB_Reactome	C2	CP:REACTOME	REACTOME_REGULATION_OF_TP53_EXPRESSION_AND_DEGRADATION	37
MSigDB_Reactome	C2	CP:REACTOME	REACTOME_REGULATION_OF_T_CELL_ACTIVATION_BY_CD28_FAMILY	79
MSigDB_Reactome	C2	CP:REACTOME	REACTOME_REMOVAL_OF_AMINOTERMINAL_PROPEPTIDES_FROM_GAMMA_CARBOXYLATED_PROTEINS	10
MSigDB_Reactome	C2	CP:REACTOME	REACTOME_REPLACEMENT_OF_PROTAMINES_BY_NUCLEOSOMES_IN_THE_MALE_PRONUCLEUS	42
MSigDB_Reactome	C2	CP:REACTOME	REACTOME_REPRESSION_OF_WNT_TARGET_GENES	14
MSigDB_Reactome	C2	CP:REACTOME	REACTOME_REPRODUCTION	158
MSigDB_Reactome	C2	CP:REACTOME	REACTOME_RESOLUTION_OF_ABASIC_SITES_AP_SITES	38
MSigDB_Reactome	C2	CP:REACTOME	REACTOME_RESOLUTION_OF_AP_SITES_VIA_THE_MULTIPLE_NUCLEOTIDE_PATCH_REPLACEMENT_PATHWAY	25
MSigDB_Reactome	C2	CP:REACTOME	REACTOME_RESOLUTION_OF_D_LOOP_STRUCTURES	37
MSigDB_Reactome	C2	CP:REACTOME	REACTOME_RESOLUTION_OF_D_LOOP_STRUCTURES_THROUGH_SYNTHESIS_DEPENDENT_STRAND_ANNEALING_SDSA	27
MSigDB_Reactome	C2	CP:REACTOME	REACTOME_RESOLUTION_OF_SISTER_CHROMATID_COHESION	127
MSigDB_Reactome	C2	CP:REACTOME	REACTOME_RESPIRATORY_ELECTRON_TRANSPORT	159
MSigDB_Reactome	C2	CP:REACTOME	REACTOME_RESPIRATORY_SYNCYTIAL_VIRUS_INFECTION_PATHWAY	121
MSigDB_Reactome	C2	CP:REACTOME	REACTOME_RESPIRATORY_SYNCYTIAL_VIRUS_RSV_ATTACHMENT_AND_ENTRY	23
MSigDB_Reactome	C2	CP:REACTOME	REACTOME_RESPIRATORY_SYNCYTIAL_VIRUS_RSV_GENOME_REPLICATION_TRANSCRIPTION_AND_TRANSLATION	17
MSigDB_Reactome	C2	CP:REACTOME	REACTOME_RESPONSE_OF_EIF2AK1_HRI_TO_HEME_DEFICIENCY	15
MSigDB_Reactome	C2	CP:REACTOME	REACTOME_RESPONSE_OF_EIF2AK4_GCN2_TO_AMINO_ACID_DEFICIENCY	102
MSigDB_Reactome	C2	CP:REACTOME	REACTOME_RESPONSE_OF_MTB_TO_PHAGOCYTOSIS	23
MSigDB_Reactome	C2	CP:REACTOME	REACTOME_RESPONSE_TO_ELEVATED_PLATELET_CYTOSOLIC_CA2	132
MSigDB_Reactome	C2	CP:REACTOME	REACTOME_RESPONSE_TO_METAL_IONS	14
MSigDB_Reactome	C2	CP:REACTOME	REACTOME_RETINOID_CYCLE_DISEASE_EVENTS	13
MSigDB_Reactome	C2	CP:REACTOME	REACTOME_RETROGRADE_NEUROTROPHIN_SIGNALLING	14
MSigDB_Reactome	C2	CP:REACTOME	REACTOME_RETROGRADE_TRANSPORT_AT_THE_TRANS_GOLGI_NETWORK	49
MSigDB_Reactome	C2	CP:REACTOME	REACTOME_RET_SIGNALING	40
MSigDB_Reactome	C2	CP:REACTOME	REACTOME_REVERSIBLE_HYDRATION_OF_CARBON_DIOXIDE	12
MSigDB_Reactome	C2	CP:REACTOME	REACTOME_RHOA_GTPASE_CYCLE	149
MSigDB_Reactome	C2	CP:REACTOME	REACTOME_RHOBTB1_GTPASE_CYCLE	23
MSigDB_Reactome	C2	CP:REACTOME	REACTOME_RHOBTB2_GTPASE_CYCLE	23
MSigDB_Reactome	C2	CP:REACTOME	REACTOME_RHOBTB3_ATPASE_CYCLE	10
MSigDB_Reactome	C2	CP:REACTOME	REACTOME_RHOBTB_GTPASE_CYCLE	35
MSigDB_Reactome	C2	CP:REACTOME	REACTOME_RHOB_GTPASE_CYCLE	70
MSigDB_Reactome	C2	CP:REACTOME	REACTOME_RHOC_GTPASE_CYCLE	74
MSigDB_Reactome	C2	CP:REACTOME	REACTOME_RHOD_GTPASE_CYCLE	53
MSigDB_Reactome	C2	CP:REACTOME	REACTOME_RHOF_GTPASE_CYCLE	42
MSigDB_Reactome	C2	CP:REACTOME	REACTOME_RHOG_GTPASE_CYCLE	74
MSigDB_Reactome	C2	CP:REACTOME	REACTOME_RHOH_GTPASE_CYCLE	37
MSigDB_Reactome	C2	CP:REACTOME	REACTOME_RHOJ_GTPASE_CYCLE	55
MSigDB_Reactome	C2	CP:REACTOME	REACTOME_RHOQ_GTPASE_CYCLE	59
MSigDB_Reactome	C2	CP:REACTOME	REACTOME_RHOU_GTPASE_CYCLE	40
MSigDB_Reactome	C2	CP:REACTOME	REACTOME_RHOV_GTPASE_CYCLE	37
MSigDB_Reactome	C2	CP:REACTOME	REACTOME_RHO_GTPASES_ACTIVATE_CIT	19
MSigDB_Reactome	C2	CP:REACTOME	REACTOME_RHO_GTPASES_ACTIVATE_FORMINS	140
MSigDB_Reactome	C2	CP:REACTOME	REACTOME_RHO_GTPASES_ACTIVATE_IQGAPS	32
MSigDB_Reactome	C2	CP:REACTOME	REACTOME_RHO_GTPASES_ACTIVATE_KTN1	11
MSigDB_Reactome	C2	CP:REACTOME	REACTOME_RHO_GTPASES_ACTIVATE_NADPH_OXIDASES	24
MSigDB_Reactome	C2	CP:REACTOME	REACTOME_RHO_GTPASES_ACTIVATE_PAKS	21
MSigDB_Reactome	C2	CP:REACTOME	REACTOME_RHO_GTPASES_ACTIVATE_PKNS	93
MSigDB_Reactome	C2	CP:REACTOME	REACTOME_RHO_GTPASES_ACTIVATE_ROCKS	19
MSigDB_Reactome	C2	CP:REACTOME	REACTOME_RHO_GTPASES_ACTIVATE_WASPS_AND_WAVES	36
MSigDB_Reactome	C2	CP:REACTOME	REACTOME_RIBAVIRIN_ADME	11
MSigDB_Reactome	C2	CP:REACTOME	REACTOME_RIPK1_MEDIATED_REGULATED_NECROSIS	32
MSigDB_Reactome	C2	CP:REACTOME	REACTOME_RIP_MEDIATED_NFKB_ACTIVATION_VIA_ZBP1	17
MSigDB_Reactome	C2	CP:REACTOME	REACTOME_RMTS_METHYLATE_HISTONE_ARGININES	78
MSigDB_Reactome	C2	CP:REACTOME	REACTOME_RNA_POLYMERASE_III_CHAIN_ELONGATION	18
MSigDB_Reactome	C2	CP:REACTOME	REACTOME_RNA_POLYMERASE_III_TRANSCRIPTION	41
MSigDB_Reactome	C2	CP:REACTOME	REACTOME_RNA_POLYMERASE_III_TRANSCRIPTION_INITIATION_FROM_TYPE_1_PROMOTER	28
MSigDB_Reactome	C2	CP:REACTOME	REACTOME_RNA_POLYMERASE_III_TRANSCRIPTION_INITIATION_FROM_TYPE_3_PROMOTER	28
MSigDB_Reactome	C2	CP:REACTOME	REACTOME_RNA_POLYMERASE_III_TRANSCRIPTION_TERMINATION	23
MSigDB_Reactome	C2	CP:REACTOME	REACTOME_RNA_POLYMERASE_II_PRE_TRANSCRIPTION_EVENTS	81
MSigDB_Reactome	C2	CP:REACTOME	REACTOME_RNA_POLYMERASE_II_TRANSCRIBES_SNRNA_GENES	81
MSigDB_Reactome	C2	CP:REACTOME	REACTOME_RNA_POLYMERASE_II_TRANSCRIPTION_TERMINATION	67
MSigDB_Reactome	C2	CP:REACTOME	REACTOME_RNA_POLYMERASE_I_PROMOTER_ESCAPE	90
MSigDB_Reactome	C2	CP:REACTOME	REACTOME_RNA_POLYMERASE_I_TRANSCRIPTION	110
MSigDB_Reactome	C2	CP:REACTOME	REACTOME_RNA_POLYMERASE_I_TRANSCRIPTION_INITIATION	47
MSigDB_Reactome	C2	CP:REACTOME	REACTOME_RNA_POLYMERASE_I_TRANSCRIPTION_TERMINATION	31
MSigDB_Reactome	C2	CP:REACTOME	REACTOME_RND1_GTPASE_CYCLE	42
MSigDB_Reactome	C2	CP:REACTOME	REACTOME_RND2_GTPASE_CYCLE	43
MSigDB_Reactome	C2	CP:REACTOME	REACTOME_RND3_GTPASE_CYCLE	42
MSigDB_Reactome	C2	CP:REACTOME	REACTOME_ROLE_OF_LAT2_NTAL_LAB_ON_CALCIUM_MOBILIZATION	71
MSigDB_Reactome	C2	CP:REACTOME	REACTOME_ROLE_OF_PHOSPHOLIPIDS_IN_PHAGOCYTOSIS	82
MSigDB_Reactome	C2	CP:REACTOME	REACTOME_ROLE_OF_SECOND_MESSENGERS_IN_NETRIN_1_SIGNALING	10
MSigDB_Reactome	C2	CP:REACTOME	REACTOME_RORA_B_C_AND_NR1D1_REV_ERBA_REGULATE_GENE_EXPRESSION	26
MSigDB_Reactome	C2	CP:REACTOME	REACTOME_ROS_AND_RNS_PRODUCTION_IN_PHAGOCYTES	36
MSigDB_Reactome	C2	CP:REACTOME	REACTOME_RRNA_MODIFICATION_IN_THE_NUCLEUS_AND_CYTOSOL	60
MSigDB_Reactome	C2	CP:REACTOME	REACTOME_RRNA_PROCESSING	205
MSigDB_Reactome	C2	CP:REACTOME	REACTOME_RRNA_PROCESSING_IN_THE_MITOCHONDRION	12
MSigDB_Reactome	C2	CP:REACTOME	REACTOME_RSV_HOST_INTERACTIONS	98
MSigDB_Reactome	C2	CP:REACTOME	REACTOME_RUNX1_AND_FOXP3_CONTROL_THE_DEVELOPMENT_OF_REGULATORY_T_LYMPHOCYTES_TREGS	10
MSigDB_Reactome	C2	CP:REACTOME	REACTOME_RUNX1_INTERACTS_WITH_CO_FACTORS_WHOSE_PRECISE_EFFECT_ON_RUNX1_TARGETS_IS_NOT_KNOWN	37
MSigDB_Reactome	C2	CP:REACTOME	REACTOME_RUNX1_REGULATES_GENES_INVOLVED_IN_MEGAKARYOCYTE_DIFFERENTIATION_AND_PLATELET_FUNCTION	96
MSigDB_Reactome	C2	CP:REACTOME	REACTOME_RUNX1_REGULATES_TRANSCRIPTION_OF_GENES_INVOLVED_IN_DIFFERENTIATION_OF_HSCS	116
MSigDB_Reactome	C2	CP:REACTOME	REACTOME_RUNX2_REGULATES_BONE_DEVELOPMENT	31
MSigDB_Reactome	C2	CP:REACTOME	REACTOME_RUNX2_REGULATES_OSTEOBLAST_DIFFERENTIATION	24
MSigDB_Reactome	C2	CP:REACTOME	REACTOME_RUNX3_REGULATES_NOTCH_SIGNALING	14
MSigDB_Reactome	C2	CP:REACTOME	REACTOME_RUNX3_REGULATES_P14_ARF	10
MSigDB_Reactome	C2	CP:REACTOME	REACTOME_SARS_COV_1_ACTIVATES_MODULATES_INNATE_IMMUNE_RESPONSES	41
MSigDB_Reactome	C2	CP:REACTOME	REACTOME_SARS_COV_1_HOST_INTERACTIONS	98
MSigDB_Reactome	C2	CP:REACTOME	REACTOME_SARS_COV_1_INFECTION	143
MSigDB_Reactome	C2	CP:REACTOME	REACTOME_SARS_COV_1_MODULATES_HOST_TRANSLATION_MACHINERY	37
MSigDB_Reactome	C2	CP:REACTOME	REACTOME_SARS_COV_1_TARGETS_HOST_INTRACELLULAR_SIGNALLING_AND_REGULATORY_PATHWAYS	16
MSigDB_Reactome	C2	CP:REACTOME	REACTOME_SARS_COV_2_ACTIVATES_MODULATES_INNATE_AND_ADAPTIVE_IMMUNE_RESPONSES	126
MSigDB_Reactome	C2	CP:REACTOME	REACTOME_SARS_COV_2_HOST_INTERACTIONS	204
MSigDB_Reactome	C2	CP:REACTOME	REACTOME_SARS_COV_2_MODULATES_AUTOPHAGY	11
MSigDB_Reactome	C2	CP:REACTOME	REACTOME_SARS_COV_2_MODULATES_HOST_TRANSLATION_MACHINERY	51
MSigDB_Reactome	C2	CP:REACTOME	REACTOME_SARS_COV_2_TARGETS_HOST_INTRACELLULAR_SIGNALLING_AND_REGULATORY_PATHWAYS	12
MSigDB_Reactome	C2	CP:REACTOME	REACTOME_SCAVENGING_BY_CLASS_A_RECEPTORS	19
MSigDB_Reactome	C2	CP:REACTOME	REACTOME_SCAVENGING_OF_HEME_FROM_PLASMA	69
MSigDB_Reactome	C2	CP:REACTOME	REACTOME_SCF_BETA_TRCP_MEDIATED_DEGRADATION_OF_EMI1	42
MSigDB_Reactome	C2	CP:REACTOME	REACTOME_SCF_SKP2_MEDIATED_DEGRADATION_OF_P27_P21	50
MSigDB_Reactome	C2	CP:REACTOME	REACTOME_SEALING_OF_THE_NUCLEAR_ENVELOPE_NE_BY_ESCRT_III	32
MSigDB_Reactome	C2	CP:REACTOME	REACTOME_SELECTIVE_AUTOPHAGY	90
MSigDB_Reactome	C2	CP:REACTOME	REACTOME_SELENOAMINO_ACID_METABOLISM	118
MSigDB_Reactome	C2	CP:REACTOME	REACTOME_SEMA3A_PAK_DEPENDENT_AXON_REPULSION	16
MSigDB_Reactome	C2	CP:REACTOME	REACTOME_SEMA3A_PLEXIN_REPULSION_SIGNALING_BY_INHIBITING_INTEGRIN_ADHESION	14
MSigDB_Reactome	C2	CP:REACTOME	REACTOME_SEMA4D_INDUCED_CELL_MIGRATION_AND_GROWTH_CONE_COLLAPSE	20
MSigDB_Reactome	C2	CP:REACTOME	REACTOME_SEMA4D_IN_SEMAPHORIN_SIGNALING	24
MSigDB_Reactome	C2	CP:REACTOME	REACTOME_SEMAPHORIN_INTERACTIONS	64
MSigDB_Reactome	C2	CP:REACTOME	REACTOME_SENESCENCE_ASSOCIATED_SECRETORY_PHENOTYPE_SASP	111
MSigDB_Reactome	C2	CP:REACTOME	REACTOME_SENSORY_PERCEPTION_OF_TASTE	47
MSigDB_Reactome	C2	CP:REACTOME	REACTOME_SENSORY_PROCESSING_OF_SOUND	77
MSigDB_Reactome	C2	CP:REACTOME	REACTOME_SENSORY_PROCESSING_OF_SOUND_BY_OUTER_HAIR_CELLS_OF_THE_COCHLEA	55
MSigDB_Reactome	C2	CP:REACTOME	REACTOME_SEPARATION_OF_SISTER_CHROMATIDS	178
MSigDB_Reactome	C2	CP:REACTOME	REACTOME_SERINE_METABOLISM	11
MSigDB_Reactome	C2	CP:REACTOME	REACTOME_SEROTONIN_NEUROTRANSMITTER_RELEASE_CYCLE	18
MSigDB_Reactome	C2	CP:REACTOME	REACTOME_SEROTONIN_RECEPTORS	12
MSigDB_Reactome	C2	CP:REACTOME	REACTOME_SHC1_EVENTS_IN_EGFR_SIGNALING	14
MSigDB_Reactome	C2	CP:REACTOME	REACTOME_SHC1_EVENTS_IN_ERBB2_SIGNALING	22
MSigDB_Reactome	C2	CP:REACTOME	REACTOME_SHC1_EVENTS_IN_ERBB4_SIGNALING	14
MSigDB_Reactome	C2	CP:REACTOME	REACTOME_SHC_MEDIATED_CASCADE_FGFR1	21
MSigDB_Reactome	C2	CP:REACTOME	REACTOME_SHC_MEDIATED_CASCADE_FGFR3	18
MSigDB_Reactome	C2	CP:REACTOME	REACTOME_SHC_MEDIATED_CASCADE_FGFR4	20
MSigDB_Reactome	C2	CP:REACTOME	REACTOME_SIALIC_ACID_METABOLISM	33
MSigDB_Reactome	C2	CP:REACTOME	REACTOME_SIGNALING_BY_ACTIVATED_POINT_MUTANTS_OF_FGFR1	11
MSigDB_Reactome	C2	CP:REACTOME	REACTOME_SIGNALING_BY_ACTIVIN	17
MSigDB_Reactome	C2	CP:REACTOME	REACTOME_SIGNALING_BY_ALK	30
MSigDB_Reactome	C2	CP:REACTOME	REACTOME_SIGNALING_BY_ALK_IN_CANCER	93
MSigDB_Reactome	C2	CP:REACTOME	REACTOME_SIGNALING_BY_BMP	31
MSigDB_Reactome	C2	CP:REACTOME	REACTOME_SIGNALING_BY_BRAF_AND_RAF1_FUSIONS	65
MSigDB_Reactome	C2	CP:REACTOME	REACTOME_SIGNALING_BY_CSF1_M_CSF_IN_MYELOID_CELLS	31
MSigDB_Reactome	C2	CP:REACTOME	REACTOME_SIGNALING_BY_CSF3_G_CSF	30
MSigDB_Reactome	C2	CP:REACTOME	REACTOME_SIGNALING_BY_CTNNB1_PHOSPHO_SITE_MUTANTS	15
MSigDB_Reactome	C2	CP:REACTOME	REACTOME_SIGNALING_BY_CYTOSOLIC_FGFR1_FUSION_MUTANTS	18
MSigDB_Reactome	C2	CP:REACTOME	REACTOME_SIGNALING_BY_EGFR	53
MSigDB_Reactome	C2	CP:REACTOME	REACTOME_SIGNALING_BY_EGFR_IN_CANCER	25
MSigDB_Reactome	C2	CP:REACTOME	REACTOME_SIGNALING_BY_ERBB2	50
MSigDB_Reactome	C2	CP:REACTOME	REACTOME_SIGNALING_BY_ERBB2_ECD_MUTANTS	16
MSigDB_Reactome	C2	CP:REACTOME	REACTOME_SIGNALING_BY_ERBB2_IN_CANCER	26
MSigDB_Reactome	C2	CP:REACTOME	REACTOME_SIGNALING_BY_ERBB4	58
MSigDB_Reactome	C2	CP:REACTOME	REACTOME_SIGNALING_BY_ERYTHROPOIETIN	25
MSigDB_Reactome	C2	CP:REACTOME	REACTOME_SIGNALING_BY_FGFR	89
MSigDB_Reactome	C2	CP:REACTOME	REACTOME_SIGNALING_BY_FGFR1	52
MSigDB_Reactome	C2	CP:REACTOME	REACTOME_SIGNALING_BY_FGFR1_IN_DISEASE	38
MSigDB_Reactome	C2	CP:REACTOME	REACTOME_SIGNALING_BY_FGFR2	73
MSigDB_Reactome	C2	CP:REACTOME	REACTOME_SIGNALING_BY_FGFR2_IIIA_TM	19
MSigDB_Reactome	C2	CP:REACTOME	REACTOME_SIGNALING_BY_FGFR2_IN_DISEASE	43
MSigDB_Reactome	C2	CP:REACTOME	REACTOME_SIGNALING_BY_FGFR3	40
MSigDB_Reactome	C2	CP:REACTOME	REACTOME_SIGNALING_BY_FGFR4	41
MSigDB_Reactome	C2	CP:REACTOME	REACTOME_SIGNALING_BY_FGFR4_IN_DISEASE	11
MSigDB_Reactome	C2	CP:REACTOME	REACTOME_SIGNALING_BY_FGFR_IN_DISEASE	63
MSigDB_Reactome	C2	CP:REACTOME	REACTOME_SIGNALING_BY_FLT3_FUSION_PROTEINS	19
MSigDB_Reactome	C2	CP:REACTOME	REACTOME_SIGNALING_BY_FLT3_ITD_AND_TKD_MUTANTS	16
MSigDB_Reactome	C2	CP:REACTOME	REACTOME_SIGNALING_BY_HEDGEHOG	137
MSigDB_Reactome	C2	CP:REACTOME	REACTOME_SIGNALING_BY_HIPPO	20
MSigDB_Reactome	C2	CP:REACTOME	REACTOME_SIGNALING_BY_INSULIN_RECEPTOR	82
MSigDB_Reactome	C2	CP:REACTOME	REACTOME_SIGNALING_BY_KIT_IN_DISEASE	20
MSigDB_Reactome	C2	CP:REACTOME	REACTOME_SIGNALING_BY_LEPTIN	11
MSigDB_Reactome	C2	CP:REACTOME	REACTOME_SIGNALING_BY_LTK	12
MSigDB_Reactome	C2	CP:REACTOME	REACTOME_SIGNALING_BY_MET	79
MSigDB_Reactome	C2	CP:REACTOME	REACTOME_SIGNALING_BY_MODERATE_KINASE_ACTIVITY_BRAF_MUTANTS	45
MSigDB_Reactome	C2	CP:REACTOME	REACTOME_SIGNALING_BY_NODAL	23
MSigDB_Reactome	C2	CP:REACTOME	REACTOME_SIGNALING_BY_NOTCH	241
MSigDB_Reactome	C2	CP:REACTOME	REACTOME_SIGNALING_BY_NOTCH1	74
MSigDB_Reactome	C2	CP:REACTOME	REACTOME_SIGNALING_BY_NOTCH1_HD_DOMAIN_MUTANTS_IN_CANCER	15
MSigDB_Reactome	C2	CP:REACTOME	REACTOME_SIGNALING_BY_NOTCH1_PEST_DOMAIN_MUTANTS_IN_CANCER	58
MSigDB_Reactome	C2	CP:REACTOME	REACTOME_SIGNALING_BY_NOTCH2	36
MSigDB_Reactome	C2	CP:REACTOME	REACTOME_SIGNALING_BY_NOTCH3	49
MSigDB_Reactome	C2	CP:REACTOME	REACTOME_SIGNALING_BY_NOTCH4	72
MSigDB_Reactome	C2	CP:REACTOME	REACTOME_SIGNALING_BY_NTRK2_TRKB	25
MSigDB_Reactome	C2	CP:REACTOME	REACTOME_SIGNALING_BY_NTRK3_TRKC	17
MSigDB_Reactome	C2	CP:REACTOME	REACTOME_SIGNALING_BY_NTRKS	134
MSigDB_Reactome	C2	CP:REACTOME	REACTOME_SIGNALING_BY_NUCLEAR_RECEPTORS	294
MSigDB_Reactome	C2	CP:REACTOME	REACTOME_SIGNALING_BY_PDGF	58
MSigDB_Reactome	C2	CP:REACTOME	REACTOME_SIGNALING_BY_PDGFRA_TRANSMEMBRANE_JUXTAMEMBRANE_AND_KINASE_DOMAIN_MUTANTS	12
MSigDB_Reactome	C2	CP:REACTOME	REACTOME_SIGNALING_BY_PDGFR_IN_DISEASE	20
MSigDB_Reactome	C2	CP:REACTOME	REACTOME_SIGNALING_BY_PTK6	54
MSigDB_Reactome	C2	CP:REACTOME	REACTOME_SIGNALING_BY_RETINOIC_ACID	41
MSigDB_Reactome	C2	CP:REACTOME	REACTOME_SIGNALING_BY_ROBO_RECEPTORS	205
MSigDB_Reactome	C2	CP:REACTOME	REACTOME_SIGNALING_BY_SCF_KIT	43
MSigDB_Reactome	C2	CP:REACTOME	REACTOME_SIGNALING_BY_TGFBR3	49
MSigDB_Reactome	C2	CP:REACTOME	REACTOME_SIGNALING_BY_TGFB_FAMILY_MEMBERS	161
MSigDB_Reactome	C2	CP:REACTOME	REACTOME_SIGNALING_BY_TGF_BETA_RECEPTOR_COMPLEX	94
MSigDB_Reactome	C2	CP:REACTOME	REACTOME_SIGNALING_BY_THE_B_CELL_RECEPTOR_BCR	153
MSigDB_Reactome	C2	CP:REACTOME	REACTOME_SIGNALING_BY_TYPE_1_INSULIN_LIKE_GROWTH_FACTOR_1_RECEPTOR_IGF1R	54
MSigDB_Reactome	C2	CP:REACTOME	REACTOME_SIGNALING_BY_VEGF	106
MSigDB_Reactome	C2	CP:REACTOME	REACTOME_SIGNALING_BY_WNT_IN_CANCER	34
MSigDB_Reactome	C2	CP:REACTOME	REACTOME_SIGNALLING_TO_ERKS	34
MSigDB_Reactome	C2	CP:REACTOME	REACTOME_SIGNALLING_TO_RAS	20
MSigDB_Reactome	C2	CP:REACTOME	REACTOME_SIGNAL_AMPLIFICATION	33
MSigDB_Reactome	C2	CP:REACTOME	REACTOME_SIGNAL_ATTENUATION	10
MSigDB_Reactome	C2	CP:REACTOME	REACTOME_SIGNAL_REGULATORY_PROTEIN_FAMILY_INTERACTIONS	16
MSigDB_Reactome	C2	CP:REACTOME	REACTOME_SIGNAL_TRANSDUCTION_BY_L1	21
MSigDB_Reactome	C2	CP:REACTOME	REACTOME_SIRT1_NEGATIVELY_REGULATES_RRNA_EXPRESSION	67
MSigDB_Reactome	C2	CP:REACTOME	REACTOME_SLBP_DEPENDENT_PROCESSING_OF_REPLICATION_DEPENDENT_HISTONE_PRE_MRNAS	11
MSigDB_Reactome	C2	CP:REACTOME	REACTOME_SLC_MEDIATED_TRANSMEMBRANE_TRANSPORT	248
MSigDB_Reactome	C2	CP:REACTOME	REACTOME_SLC_TRANSPORTER_DISORDERS	99
MSigDB_Reactome	C2	CP:REACTOME	REACTOME_SMAD2_SMAD3_SMAD4_HETEROTRIMER_REGULATES_TRANSCRIPTION	36
MSigDB_Reactome	C2	CP:REACTOME	REACTOME_SMOOTH_MUSCLE_CONTRACTION	43
MSigDB_Reactome	C2	CP:REACTOME	REACTOME_SNRNP_ASSEMBLY	54
MSigDB_Reactome	C2	CP:REACTOME	REACTOME_SODIUM_CALCIUM_EXCHANGERS	11
MSigDB_Reactome	C2	CP:REACTOME	REACTOME_SOMITOGENESIS	45
MSigDB_Reactome	C2	CP:REACTOME	REACTOME_SPECIFICATION_OF_PRIMORDIAL_GERM_CELLS	12
MSigDB_Reactome	C2	CP:REACTOME	REACTOME_SPECIFICATION_OF_THE_NEURAL_PLATE_BORDER	17
MSigDB_Reactome	C2	CP:REACTOME	REACTOME_SPHINGOLIPID_CATABOLISM	12
MSigDB_Reactome	C2	CP:REACTOME	REACTOME_SPHINGOLIPID_DE_NOVO_BIOSYNTHESIS	37
MSigDB_Reactome	C2	CP:REACTOME	REACTOME_SPHINGOLIPID_METABOLISM	107
MSigDB_Reactome	C2	CP:REACTOME	REACTOME_SPRY_REGULATION_OF_FGF_SIGNALING	16
MSigDB_Reactome	C2	CP:REACTOME	REACTOME_SRP_DEPENDENT_COTRANSLATIONAL_PROTEIN_TARGETING_TO_MEMBRANE	113
MSigDB_Reactome	C2	CP:REACTOME	REACTOME_STABILIZATION_OF_P53	44
MSigDB_Reactome	C2	CP:REACTOME	REACTOME_STAT3_NUCLEAR_EVENTS_DOWNSTREAM_OF_ALK_SIGNALING	11
MSigDB_Reactome	C2	CP:REACTOME	REACTOME_STAT5_ACTIVATION_DOWNSTREAM_OF_FLT3_ITD_MUTANTS	10
MSigDB_Reactome	C2	CP:REACTOME	REACTOME_STIMULI_SENSING_CHANNELS	106
MSigDB_Reactome	C2	CP:REACTOME	REACTOME_STING_MEDIATED_INDUCTION_OF_HOST_IMMUNE_RESPONSES	16
MSigDB_Reactome	C2	CP:REACTOME	REACTOME_STRAND_ASYNCHRONOUS_MITOCHONDRIAL_DNA_REPLICATION	10
MSigDB_Reactome	C2	CP:REACTOME	REACTOME_STRIATED_MUSCLE_CONTRACTION	36
MSigDB_Reactome	C2	CP:REACTOME	REACTOME_SULFUR_AMINO_ACID_METABOLISM	28
MSigDB_Reactome	C2	CP:REACTOME	REACTOME_SUMOYLATION	189
MSigDB_Reactome	C2	CP:REACTOME	REACTOME_SUMOYLATION_OF_CHROMATIN_ORGANIZATION_PROTEINS	71
MSigDB_Reactome	C2	CP:REACTOME	REACTOME_SUMOYLATION_OF_DNA_DAMAGE_RESPONSE_AND_REPAIR_PROTEINS	77
MSigDB_Reactome	C2	CP:REACTOME	REACTOME_SUMOYLATION_OF_DNA_METHYLATION_PROTEINS	16
MSigDB_Reactome	C2	CP:REACTOME	REACTOME_SUMOYLATION_OF_DNA_REPLICATION_PROTEINS	46
MSigDB_Reactome	C2	CP:REACTOME	REACTOME_SUMOYLATION_OF_IMMUNE_RESPONSE_PROTEINS	12
MSigDB_Reactome	C2	CP:REACTOME	REACTOME_SUMOYLATION_OF_INTRACELLULAR_RECEPTORS	30
MSigDB_Reactome	C2	CP:REACTOME	REACTOME_SUMOYLATION_OF_RNA_BINDING_PROTEINS	47
MSigDB_Reactome	C2	CP:REACTOME	REACTOME_SUMOYLATION_OF_SUMOYLATION_PROTEINS	35
MSigDB_Reactome	C2	CP:REACTOME	REACTOME_SUMOYLATION_OF_TRANSCRIPTION_COFACTORS	44
MSigDB_Reactome	C2	CP:REACTOME	REACTOME_SUMOYLATION_OF_TRANSCRIPTION_FACTORS	20
MSigDB_Reactome	C2	CP:REACTOME	REACTOME_SUMOYLATION_OF_UBIQUITINYLATION_PROTEINS	39
MSigDB_Reactome	C2	CP:REACTOME	REACTOME_SUPPRESSION_OF_PHAGOSOMAL_MATURATION	13
MSigDB_Reactome	C2	CP:REACTOME	REACTOME_SURFACTANT_METABOLISM	30
MSigDB_Reactome	C2	CP:REACTOME	REACTOME_SWITCHING_OF_ORIGINS_TO_A_POST_REPLICATIVE_STATE	79
MSigDB_Reactome	C2	CP:REACTOME	REACTOME_SYNAPTIC_ADHESION_LIKE_MOLECULES	21
MSigDB_Reactome	C2	CP:REACTOME	REACTOME_SYNDECAN_INTERACTIONS	27
MSigDB_Reactome	C2	CP:REACTOME	REACTOME_SYNTHESIS_OF_ACTIVE_UBIQUITIN_ROLES_OF_E1_AND_E2_ENZYMES	30
MSigDB_Reactome	C2	CP:REACTOME	REACTOME_SYNTHESIS_OF_BILE_ACIDS_AND_BILE_SALTS	33
MSigDB_Reactome	C2	CP:REACTOME	REACTOME_SYNTHESIS_OF_BILE_ACIDS_AND_BILE_SALTS_VIA_24_HYDROXYCHOLESTEROL	13
MSigDB_Reactome	C2	CP:REACTOME	REACTOME_SYNTHESIS_OF_BILE_ACIDS_AND_BILE_SALTS_VIA_27_HYDROXYCHOLESTEROL	14
MSigDB_Reactome	C2	CP:REACTOME	REACTOME_SYNTHESIS_OF_BILE_ACIDS_AND_BILE_SALTS_VIA_7ALPHA_HYDROXYCHOLESTEROL	23
MSigDB_Reactome	C2	CP:REACTOME	REACTOME_SYNTHESIS_OF_DNA	108
MSigDB_Reactome	C2	CP:REACTOME	REACTOME_SYNTHESIS_OF_GLYCOSYLPHOSPHATIDYLINOSITOL_GPI	18
MSigDB_Reactome	C2	CP:REACTOME	REACTOME_SYNTHESIS_OF_IP2_IP_AND_INS_IN_THE_CYTOSOL	14
MSigDB_Reactome	C2	CP:REACTOME	REACTOME_SYNTHESIS_OF_IP3_AND_IP4_IN_THE_CYTOSOL	26
MSigDB_Reactome	C2	CP:REACTOME	REACTOME_SYNTHESIS_OF_LEUKOTRIENES_LT_AND_EOXINS_EX	20
MSigDB_Reactome	C2	CP:REACTOME	REACTOME_SYNTHESIS_OF_PA	39
MSigDB_Reactome	C2	CP:REACTOME	REACTOME_SYNTHESIS_OF_PC	28
MSigDB_Reactome	C2	CP:REACTOME	REACTOME_SYNTHESIS_OF_PE	13
MSigDB_Reactome	C2	CP:REACTOME	REACTOME_SYNTHESIS_OF_PIPS_AT_THE_EARLY_ENDOSOME_MEMBRANE	16
MSigDB_Reactome	C2	CP:REACTOME	REACTOME_SYNTHESIS_OF_PIPS_AT_THE_GOLGI_MEMBRANE	18
MSigDB_Reactome	C2	CP:REACTOME	REACTOME_SYNTHESIS_OF_PIPS_AT_THE_LATE_ENDOSOME_MEMBRANE	11
MSigDB_Reactome	C2	CP:REACTOME	REACTOME_SYNTHESIS_OF_PIPS_AT_THE_PLASMA_MEMBRANE	53
MSigDB_Reactome	C2	CP:REACTOME	REACTOME_SYNTHESIS_OF_PROSTAGLANDINS_PG_AND_THROMBOXANES_TX	15
MSigDB_Reactome	C2	CP:REACTOME	REACTOME_SYNTHESIS_OF_PYROPHOSPHATES_IN_THE_CYTOSOL	10
MSigDB_Reactome	C2	CP:REACTOME	REACTOME_SYNTHESIS_OF_SUBSTRATES_IN_N_GLYCAN_BIOSYTHESIS	65
MSigDB_Reactome	C2	CP:REACTOME	REACTOME_SYNTHESIS_OF_VERY_LONG_CHAIN_FATTY_ACYL_COAS	24
MSigDB_Reactome	C2	CP:REACTOME	REACTOME_SYNTHESIS_SECRETION_AND_DEACYLATION_OF_GHRELIN	19
MSigDB_Reactome	C2	CP:REACTOME	REACTOME_SYNTHESIS_SECRETION_AND_INACTIVATION_OF_GLUCAGON_LIKE_PEPTIDE_1_GLP_1	21
MSigDB_Reactome	C2	CP:REACTOME	REACTOME_SYNTHESIS_SECRETION_AND_INACTIVATION_OF_GLUCOSE_DEPENDENT_INSULINOTROPIC_POLYPEPTIDE_GIP	13
MSigDB_Reactome	C2	CP:REACTOME	REACTOME_S_PHASE	150
MSigDB_Reactome	C2	CP:REACTOME	REACTOME_TAK1_DEPENDENT_IKK_AND_NF_KAPPA_B_ACTIVATION	44
MSigDB_Reactome	C2	CP:REACTOME	REACTOME_TANDEM_PORE_DOMAIN_POTASSIUM_CHANNELS	12
MSigDB_Reactome	C2	CP:REACTOME	REACTOME_TBC_RABGAPS	44
MSigDB_Reactome	C2	CP:REACTOME	REACTOME_TCF_DEPENDENT_SIGNALING_IN_RESPONSE_TO_WNT	220
MSigDB_Reactome	C2	CP:REACTOME	REACTOME_TCR_SIGNALING	111
MSigDB_Reactome	C2	CP:REACTOME	REACTOME_TELOMERE_C_STRAND_LAGGING_STRAND_SYNTHESIS	34
MSigDB_Reactome	C2	CP:REACTOME	REACTOME_TELOMERE_C_STRAND_SYNTHESIS_INITIATION	13
MSigDB_Reactome	C2	CP:REACTOME	REACTOME_TELOMERE_EXTENSION_BY_TELOMERASE	23
MSigDB_Reactome	C2	CP:REACTOME	REACTOME_TELOMERE_MAINTENANCE	112
MSigDB_Reactome	C2	CP:REACTOME	REACTOME_TERMINATION_OF_O_GLYCAN_BIOSYNTHESIS	23
MSigDB_Reactome	C2	CP:REACTOME	REACTOME_TERMINATION_OF_TRANSLESION_DNA_SYNTHESIS	32
MSigDB_Reactome	C2	CP:REACTOME	REACTOME_TETRAHYDROBIOPTERIN_BH4_SYNTHESIS_RECYCLING_SALVAGE_AND_REGULATION	10
MSigDB_Reactome	C2	CP:REACTOME	REACTOME_TFAP2_AP_2_FAMILY_REGULATES_TRANSCRIPTION_OF_GROWTH_FACTORS_AND_THEIR_RECEPTORS	15
MSigDB_Reactome	C2	CP:REACTOME	REACTOME_TGFBR3_EXPRESSION	28
MSigDB_Reactome	C2	CP:REACTOME	REACTOME_TGFBR3_PTM_REGULATION	11
MSigDB_Reactome	C2	CP:REACTOME	REACTOME_TGF_BETA_RECEPTOR_SIGNALING_ACTIVATES_SMADS	47
MSigDB_Reactome	C2	CP:REACTOME	REACTOME_TGF_BETA_RECEPTOR_SIGNALING_IN_EMT_EPITHELIAL_TO_MESENCHYMAL_TRANSITION	16
MSigDB_Reactome	C2	CP:REACTOME	REACTOME_THE_ACTIVATION_OF_ARYLSULFATASES	13
MSigDB_Reactome	C2	CP:REACTOME	REACTOME_THE_CANONICAL_RETINOID_CYCLE_IN_RODS_TWILIGHT_VISION	22
MSigDB_Reactome	C2	CP:REACTOME	REACTOME_THE_CRY_PER_KINASE_COMPLEX_REPRESSES_TRANSACTIVATION_BY_THE_BMAL_CLOCK_ARNTL_CLOCK_COMPLEX	14
MSigDB_Reactome	C2	CP:REACTOME	REACTOME_THE_NLRP3_INFLAMMASOME	16
MSigDB_Reactome	C2	CP:REACTOME	REACTOME_THE_PHOTOTRANSDUCTION_CASCADE	34
MSigDB_Reactome	C2	CP:REACTOME	REACTOME_THE_ROLE_OF_GTSE1_IN_G2_M_PROGRESSION_AFTER_G2_CHECKPOINT	66
MSigDB_Reactome	C2	CP:REACTOME	REACTOME_THE_ROLE_OF_NEF_IN_HIV_1_REPLICATION_AND_DISEASE_PATHOGENESIS	28
MSigDB_Reactome	C2	CP:REACTOME	REACTOME_THROMBIN_SIGNALLING_THROUGH_PROTEINASE_ACTIVATED_RECEPTORS_PARS	32
MSigDB_Reactome	C2	CP:REACTOME	REACTOME_THROMBOXANE_SIGNALLING_THROUGH_TP_RECEPTOR	24
MSigDB_Reactome	C2	CP:REACTOME	REACTOME_THYROXINE_BIOSYNTHESIS	10
MSigDB_Reactome	C2	CP:REACTOME	REACTOME_TICAM1_DEPENDENT_ACTIVATION_OF_IRF3_IRF7	13
MSigDB_Reactome	C2	CP:REACTOME	REACTOME_TICAM1_RIP1_MEDIATED_IKK_COMPLEX_RECRUITMENT	19
MSigDB_Reactome	C2	CP:REACTOME	REACTOME_TICAM1_TRAF6_DEPENDENT_INDUCTION_OF_TAK1_COMPLEX	11
MSigDB_Reactome	C2	CP:REACTOME	REACTOME_TIE2_SIGNALING	18
MSigDB_Reactome	C2	CP:REACTOME	REACTOME_TIGHT_JUNCTION_INTERACTIONS	30
MSigDB_Reactome	C2	CP:REACTOME	REACTOME_TNFR1_INDUCED_NF_KAPPA_B_SIGNALING_PATHWAY	33
MSigDB_Reactome	C2	CP:REACTOME	REACTOME_TNFR1_INDUCED_PROAPOPTOTIC_SIGNALING	25
MSigDB_Reactome	C2	CP:REACTOME	REACTOME_TNFR2_NON_CANONICAL_NF_KB_PATHWAY	88
MSigDB_Reactome	C2	CP:REACTOME	REACTOME_TNFS_BIND_THEIR_PHYSIOLOGICAL_RECEPTORS	29
MSigDB_Reactome	C2	CP:REACTOME	REACTOME_TNF_RECEPTOR_SUPERFAMILY_TNFSF_MEMBERS_MEDIATING_NON_CANONICAL_NF_KB_PATHWAY	17
MSigDB_Reactome	C2	CP:REACTOME	REACTOME_TNF_SIGNALING	57
MSigDB_Reactome	C2	CP:REACTOME	REACTOME_TOLL_LIKE_RECEPTOR_9_TLR9_CASCADE	109
MSigDB_Reactome	C2	CP:REACTOME	REACTOME_TOLL_LIKE_RECEPTOR_CASCADES	170
MSigDB_Reactome	C2	CP:REACTOME	REACTOME_TOLL_LIKE_RECEPTOR_TLR1_TLR2_CASCADE	115
MSigDB_Reactome	C2	CP:REACTOME	REACTOME_TP53_REGULATES_METABOLIC_GENES	84
MSigDB_Reactome	C2	CP:REACTOME	REACTOME_TP53_REGULATES_TRANSCRIPTION_OF_ADDITIONAL_CELL_CYCLE_GENES_WHOSE_EXACT_ROLE_IN_THE_P53_PATHWAY_REMAIN_UNCERTAIN	21
MSigDB_Reactome	C2	CP:REACTOME	REACTOME_TP53_REGULATES_TRANSCRIPTION_OF_CASPASE_ACTIVATORS_AND_CASPASES	12
MSigDB_Reactome	C2	CP:REACTOME	REACTOME_TP53_REGULATES_TRANSCRIPTION_OF_CELL_CYCLE_GENES	49
MSigDB_Reactome	C2	CP:REACTOME	REACTOME_TP53_REGULATES_TRANSCRIPTION_OF_CELL_DEATH_GENES	44
MSigDB_Reactome	C2	CP:REACTOME	REACTOME_TP53_REGULATES_TRANSCRIPTION_OF_DEATH_RECEPTORS_AND_LIGANDS	12
MSigDB_Reactome	C2	CP:REACTOME	REACTOME_TP53_REGULATES_TRANSCRIPTION_OF_DNA_REPAIR_GENES	62
MSigDB_Reactome	C2	CP:REACTOME	REACTOME_TP53_REGULATES_TRANSCRIPTION_OF_GENES_INVOLVED_IN_CYTOCHROME_C_RELEASE	20
MSigDB_Reactome	C2	CP:REACTOME	REACTOME_TP53_REGULATES_TRANSCRIPTION_OF_GENES_INVOLVED_IN_G1_CELL_CYCLE_ARREST	14
MSigDB_Reactome	C2	CP:REACTOME	REACTOME_TP53_REGULATES_TRANSCRIPTION_OF_GENES_INVOLVED_IN_G2_CELL_CYCLE_ARREST	18
MSigDB_Reactome	C2	CP:REACTOME	REACTOME_TP53_REGULATES_TRANSCRIPTION_OF_SEVERAL_ADDITIONAL_CELL_DEATH_GENES_WHOSE_SPECIFIC_ROLES_IN_P53_DEPENDENT_APOPTOSIS_REMAIN_UNCERTAIN	14
MSigDB_Reactome	C2	CP:REACTOME	REACTOME_TRAF3_DEPENDENT_IRF_ACTIVATION_PATHWAY	15
MSigDB_Reactome	C2	CP:REACTOME	REACTOME_TRAF6_MEDIATED_INDUCTION_OF_TAK1_COMPLEX_WITHIN_TLR4_COMPLEX	16
MSigDB_Reactome	C2	CP:REACTOME	REACTOME_TRAF6_MEDIATED_IRF7_ACTIVATION	30
MSigDB_Reactome	C2	CP:REACTOME	REACTOME_TRAF6_MEDIATED_IRF7_ACTIVATION_IN_TLR7_8_OR_9_SIGNALING	13
MSigDB_Reactome	C2	CP:REACTOME	REACTOME_TRAF6_MEDIATED_NF_KB_ACTIVATION	25
MSigDB_Reactome	C2	CP:REACTOME	REACTOME_TRAFFICKING_AND_PROCESSING_OF_ENDOSOMAL_TLR	13
MSigDB_Reactome	C2	CP:REACTOME	REACTOME_TRAFFICKING_OF_AMPA_RECEPTORS	31
MSigDB_Reactome	C2	CP:REACTOME	REACTOME_TRAFFICKING_OF_GLUR2_CONTAINING_AMPA_RECEPTORS	17
MSigDB_Reactome	C2	CP:REACTOME	REACTOME_TRANSCRIPTIONAL_ACTIVATION_OF_MITOCHONDRIAL_BIOGENESIS	55
MSigDB_Reactome	C2	CP:REACTOME	REACTOME_TRANSCRIPTIONAL_ACTIVITY_OF_SMAD2_SMAD3_SMAD4_HETEROTRIMER	51
MSigDB_Reactome	C2	CP:REACTOME	REACTOME_TRANSCRIPTIONAL_AND_POST_TRANSLATIONAL_REGULATION_OF_MITF_M_EXPRESSION_AND_ACTIVITY	62
MSigDB_Reactome	C2	CP:REACTOME	REACTOME_TRANSCRIPTIONAL_REGULATION_BY_E2F6	34
MSigDB_Reactome	C2	CP:REACTOME	REACTOME_TRANSCRIPTIONAL_REGULATION_BY_MECP2	63
MSigDB_Reactome	C2	CP:REACTOME	REACTOME_TRANSCRIPTIONAL_REGULATION_BY_NPAS4	34
MSigDB_Reactome	C2	CP:REACTOME	REACTOME_TRANSCRIPTIONAL_REGULATION_BY_RUNX1	224
MSigDB_Reactome	C2	CP:REACTOME	REACTOME_TRANSCRIPTIONAL_REGULATION_BY_RUNX2	106
MSigDB_Reactome	C2	CP:REACTOME	REACTOME_TRANSCRIPTIONAL_REGULATION_BY_RUNX3	86
MSigDB_Reactome	C2	CP:REACTOME	REACTOME_TRANSCRIPTIONAL_REGULATION_BY_SMALL_RNAS	106
MSigDB_Reactome	C2	CP:REACTOME	REACTOME_TRANSCRIPTIONAL_REGULATION_BY_THE_AP_2_TFAP2_FAMILY_OF_TRANSCRIPTION_FACTORS	38
MSigDB_Reactome	C2	CP:REACTOME	REACTOME_TRANSCRIPTIONAL_REGULATION_BY_VENTX	41
MSigDB_Reactome	C2	CP:REACTOME	REACTOME_TRANSCRIPTIONAL_REGULATION_OF_BROWN_AND_BEIGE_ADIPOCYTE_DIFFERENTIATION	31
MSigDB_Reactome	C2	CP:REACTOME	REACTOME_TRANSCRIPTIONAL_REGULATION_OF_GRANULOPOIESIS	89
MSigDB_Reactome	C2	CP:REACTOME	REACTOME_TRANSCRIPTIONAL_REGULATION_OF_PLURIPOTENT_STEM_CELLS	31
MSigDB_Reactome	C2	CP:REACTOME	REACTOME_TRANSCRIPTIONAL_REGULATION_OF_TESTIS_DIFFERENTIATION	13
MSigDB_Reactome	C2	CP:REACTOME	REACTOME_TRANSCRIPTIONAL_REGULATION_OF_WHITE_ADIPOCYTE_DIFFERENTIATION	84
MSigDB_Reactome	C2	CP:REACTOME	REACTOME_TRANSCRIPTION_COUPLED_NUCLEOTIDE_EXCISION_REPAIR_TC_NER	76
MSigDB_Reactome	C2	CP:REACTOME	REACTOME_TRANSCRIPTION_OF_E2F_TARGETS_UNDER_NEGATIVE_CONTROL_BY_DREAM_COMPLEX	19
MSigDB_Reactome	C2	CP:REACTOME	REACTOME_TRANSCRIPTION_OF_E2F_TARGETS_UNDER_NEGATIVE_CONTROL_BY_P107_RBL1_AND_P130_RBL2_IN_COMPLEX_WITH_HDAC1	16
MSigDB_Reactome	C2	CP:REACTOME	REACTOME_TRANSCRIPTION_OF_THE_HIV_GENOME	70
MSigDB_Reactome	C2	CP:REACTOME	REACTOME_TRANSFERRIN_ENDOCYTOSIS_AND_RECYCLING	31
MSigDB_Reactome	C2	CP:REACTOME	REACTOME_TRANSLATION	295
MSigDB_Reactome	C2	CP:REACTOME	REACTOME_TRANSLATION_OF_REPLICASE_AND_ASSEMBLY_OF_THE_REPLICATION_TRANSCRIPTION_COMPLEX	14
MSigDB_Reactome	C2	CP:REACTOME	REACTOME_TRANSLATION_OF_SARS_COV_1_STRUCTURAL_PROTEINS	29
MSigDB_Reactome	C2	CP:REACTOME	REACTOME_TRANSLATION_OF_SARS_COV_2_STRUCTURAL_PROTEINS	61
MSigDB_Reactome	C2	CP:REACTOME	REACTOME_TRANSLESION_SYNTHESIS_BY_POLH	19
MSigDB_Reactome	C2	CP:REACTOME	REACTOME_TRANSLESION_SYNTHESIS_BY_POLK	17
MSigDB_Reactome	C2	CP:REACTOME	REACTOME_TRANSLESION_SYNTHESIS_BY_Y_FAMILY_DNA_POLYMERASES_BYPASSES_LESIONS_ON_DNA_TEMPLATE	39
MSigDB_Reactome	C2	CP:REACTOME	REACTOME_TRANSLOCATION_OF_SLC2A4_GLUT4_TO_THE_PLASMA_MEMBRANE	72
MSigDB_Reactome	C2	CP:REACTOME	REACTOME_TRANSMISSION_ACROSS_CHEMICAL_SYNAPSES	270
MSigDB_Reactome	C2	CP:REACTOME	REACTOME_TRANSPORT_OF_BILE_SALTS_AND_ORGANIC_ACIDS_METAL_IONS_AND_AMINE_COMPOUNDS	84
MSigDB_Reactome	C2	CP:REACTOME	REACTOME_TRANSPORT_OF_CONNEXONS_TO_THE_PLASMA_MEMBRANE	21
MSigDB_Reactome	C2	CP:REACTOME	REACTOME_TRANSPORT_OF_INORGANIC_CATIONS_ANIONS_AND_AMINO_ACIDS_OLIGOPEPTIDES	107
MSigDB_Reactome	C2	CP:REACTOME	REACTOME_TRANSPORT_OF_MATURE_MRNAS_DERIVED_FROM_INTRONLESS_TRANSCRIPTS	43
MSigDB_Reactome	C2	CP:REACTOME	REACTOME_TRANSPORT_OF_MATURE_TRANSCRIPT_TO_CYTOPLASM	84
MSigDB_Reactome	C2	CP:REACTOME	REACTOME_TRANSPORT_OF_NUCLEOSIDES_AND_FREE_PURINE_AND_PYRIMIDINE_BASES_ACROSS_THE_PLASMA_MEMBRANE	12
MSigDB_Reactome	C2	CP:REACTOME	REACTOME_TRANSPORT_OF_ORGANIC_ANIONS	11
MSigDB_Reactome	C2	CP:REACTOME	REACTOME_TRANSPORT_OF_THE_SLBP_DEPENDANT_MATURE_MRNA	36
MSigDB_Reactome	C2	CP:REACTOME	REACTOME_TRANSPORT_OF_VITAMINS_NUCLEOSIDES_AND_RELATED_MOLECULES	43
MSigDB_Reactome	C2	CP:REACTOME	REACTOME_TRANSPORT_TO_THE_GOLGI_AND_SUBSEQUENT_MODIFICATION	187
MSigDB_Reactome	C2	CP:REACTOME	REACTOME_TRANS_GOLGI_NETWORK_VESICLE_BUDDING	72
MSigDB_Reactome	C2	CP:REACTOME	REACTOME_TRIGLYCERIDE_BIOSYNTHESIS	14
MSigDB_Reactome	C2	CP:REACTOME	REACTOME_TRIGLYCERIDE_CATABOLISM	24
MSigDB_Reactome	C2	CP:REACTOME	REACTOME_TRIGLYCERIDE_METABOLISM	38
MSigDB_Reactome	C2	CP:REACTOME	REACTOME_TRISTETRAPROLIN_TTP_ZFP36_BINDS_AND_DESTABILIZES_MRNA	17
MSigDB_Reactome	C2	CP:REACTOME	REACTOME_TRNA_AMINOACYLATION	42
MSigDB_Reactome	C2	CP:REACTOME	REACTOME_TRNA_MODIFICATION_IN_THE_NUCLEUS_AND_CYTOSOL	44
MSigDB_Reactome	C2	CP:REACTOME	REACTOME_TRNA_PROCESSING	112
MSigDB_Reactome	C2	CP:REACTOME	REACTOME_TRNA_PROCESSING_IN_THE_NUCLEUS	59
MSigDB_Reactome	C2	CP:REACTOME	REACTOME_TRP_CHANNELS	28
MSigDB_Reactome	C2	CP:REACTOME	REACTOME_TRYPTOPHAN_CATABOLISM	14
MSigDB_Reactome	C2	CP:REACTOME	REACTOME_TURBULENT_OSCILLATORY_DISTURBED_FLOW_SHEAR_STRESS_ACTIVATES_SIGNALING_BY_PIEZO1_AND_INTEGRINS_IN_ENDOTHELIAL_CELLS	31
MSigDB_Reactome	C2	CP:REACTOME	REACTOME_TYPE_I_HEMIDESMOSOME_ASSEMBLY	11
MSigDB_Reactome	C2	CP:REACTOME	REACTOME_UBIQUINOL_BIOSYNTHESIS	13
MSigDB_Reactome	C2	CP:REACTOME	REACTOME_UBIQUITIN_DEPENDENT_DEGRADATION_OF_CYCLIN_D	39
MSigDB_Reactome	C2	CP:REACTOME	REACTOME_UB_SPECIFIC_PROCESSING_PROTEASES	207
MSigDB_Reactome	C2	CP:REACTOME	REACTOME_UCH_PROTEINASES	88
MSigDB_Reactome	C2	CP:REACTOME	REACTOME_UNBLOCKING_OF_NMDA_RECEPTORS_GLUTAMATE_BINDING_AND_ACTIVATION	21
MSigDB_Reactome	C2	CP:REACTOME	REACTOME_UNFOLDED_PROTEIN_RESPONSE_UPR	93
MSigDB_Reactome	C2	CP:REACTOME	REACTOME_UNWINDING_OF_DNA	12
MSigDB_Reactome	C2	CP:REACTOME	REACTOME_UPTAKE_AND_ACTIONS_OF_BACTERIAL_TOXINS	29
MSigDB_Reactome	C2	CP:REACTOME	REACTOME_UPTAKE_AND_FUNCTION_OF_ANTHRAX_TOXINS	11
MSigDB_Reactome	C2	CP:REACTOME	REACTOME_UPTAKE_OF_DIETARY_COBALAMINS_INTO_ENTEROCYTES	10
MSigDB_Reactome	C2	CP:REACTOME	REACTOME_UREA_CYCLE	10
MSigDB_Reactome	C2	CP:REACTOME	REACTOME_VASOPRESSIN_REGULATES_RENAL_WATER_HOMEOSTASIS_VIA_AQUAPORINS	43
MSigDB_Reactome	C2	CP:REACTOME	REACTOME_VEGFR2_MEDIATED_CELL_PROLIFERATION	19
MSigDB_Reactome	C2	CP:REACTOME	REACTOME_VEGFR2_MEDIATED_VASCULAR_PERMEABILITY	27
MSigDB_Reactome	C2	CP:REACTOME	REACTOME_VIF_MEDIATED_DEGRADATION_OF_APOBEC3G	41
MSigDB_Reactome	C2	CP:REACTOME	REACTOME_VIRAL_MESSENGER_RNA_SYNTHESIS	44
MSigDB_Reactome	C2	CP:REACTOME	REACTOME_VISUAL_PHOTOTRANSDUCTION	99
MSigDB_Reactome	C2	CP:REACTOME	REACTOME_VITAMIN_B5_PANTOTHENATE_METABOLISM	20
MSigDB_Reactome	C2	CP:REACTOME	REACTOME_VITAMIN_D_CALCIFEROL_METABOLISM	12
MSigDB_Reactome	C2	CP:REACTOME	REACTOME_VLDLR_INTERNALISATION_AND_DEGRADATION	16
MSigDB_Reactome	C2	CP:REACTOME	REACTOME_VOLTAGE_GATED_POTASSIUM_CHANNELS	43
MSigDB_Reactome	C2	CP:REACTOME	REACTOME_VXPX_CARGO_TARGETING_TO_CILIUM	21
MSigDB_Reactome	C2	CP:REACTOME	REACTOME_WNT5A_DEPENDENT_INTERNALIZATION_OF_FZD2_FZD5_AND_ROR2	13
MSigDB_Reactome	C2	CP:REACTOME	REACTOME_WNT5A_DEPENDENT_INTERNALIZATION_OF_FZD4	15
MSigDB_Reactome	C2	CP:REACTOME	REACTOME_WNT_LIGAND_BIOGENESIS_AND_TRAFFICKING	26
MSigDB_Reactome	C2	CP:REACTOME	REACTOME_XENOBIOTICS	23
MSigDB_Reactome	C2	CP:REACTOME	REACTOME_YAP1_AND_WWTR1_TAZ_STIMULATED_GENE_EXPRESSION	15
MSigDB_Reactome	C2	CP:REACTOME	REACTOME_ZBP1_DAI_MEDIATED_INDUCTION_OF_TYPE_I_IFNS	21
MSigDB_Reactome	C2	CP:REACTOME	REACTOME_ZINC_INFLUX_INTO_CELLS_BY_THE_SLC39_GENE_FAMILY	10
MSigDB_Reactome	C2	CP:REACTOME	REACTOME_ZINC_TRANSPORTERS	15
MSigDB_Reactome	C2	CP:REACTOME	REACTOME_ZYGOTIC_GENOME_ACTIVATION_ZGA	17
MSigDB_Reactome	C2	CP:REACTOME	REACTOME_Z_DECAY_DEGRADATION_OF_MATERNAL_MRNAS_BY_ZYGOTICALLY_EXPRESSED_FACTORS	12
C01_02_rna_pathway_activity_qc.tsv
metric	value
stage	C01-02
method	rank_based_mean_pathway_activity
n_tcga_samples	92
n_gse53625_samples	179
n_hallmark_pathways_input	50
n_hallmark_pathways_computable_both	50
n_tcga_genes_collapsed	36152
n_gse53625_genes_collapsed	10068
out_tcga_activity	G:/vscode/newproject/escc/PAST_Fusion/data/processed/matrices_pathway_level/TCGA_Hallmark_RNA_rank_pathway_activity_92.tsv
out_gse53625_activity	G:/vscode/newproject/escc/PAST_Fusion/data/processed/matrices_pathway_level/GSE53625_Hallmark_RNA_rank_pathway_activity_179.tsv
out_overlap	G:/vscode/newproject/escc/PAST_Fusion/results/qc/C01_02_hallmark_rna_pathway_overlap.tsv
C01_03_cnv_pathway_burden_qc.tsv
metric	value
stage	C01-03
method	gene_level_cnv_to_pathway_burden
n_tcga_samples	92
n_hallmark_pathways_input	50
n_hallmark_pathways_computable	50
n_cnv_genes_collapsed	32692
cnv_abs_min	0.003309
cnv_abs_max	0.497867
cnv_amp_max	0.310762
cnv_del_max	0.308069
out_abs_burden	G:/vscode/newproject/escc/PAST_Fusion/data/processed/matrices_pathway_level/TCGA_Hallmark_CNV_abs_burden_92.tsv
out_amp_burden	G:/vscode/newproject/escc/PAST_Fusion/data/processed/matrices_pathway_level/TCGA_Hallmark_CNV_amp_burden_92.tsv
out_del_burden	G:/vscode/newproject/escc/PAST_Fusion/data/processed/matrices_pathway_level/TCGA_Hallmark_CNV_del_burden_92.tsv
out_overlap	G:/vscode/newproject/escc/PAST_Fusion/results/qc/C01_03_hallmark_cnv_pathway_overlap.tsv
C01_04C_methylation_pathway_state_qc.tsv
metric	value
stage	C01-04C
method	promoter_cpg_mean_to_gene_then_pathway_mean
n_tcga_samples	92
n_beta_rows_all	486427
n_beta_promoter_cpg_retained_for_hallmark	49632
n_promoter_annotation_rows_hallmark_genes	50255
n_unique_promoter_cpg_hallmark_genes	49632
n_unique_hallmark_genes_with_promoter_cpg	4164
n_gene_methylation_scores	4164
n_hallmark_pathways_input	50
n_hallmark_pathways_computable	50
methylation_state_min	0.096648
methylation_state_max	0.557386
rna_alignment_status	checked
rna_sample_identical_to_methylation_columns	TRUE
out_gene_methylation	G:/vscode/newproject/escc/PAST_Fusion/data/processed/matrices_gene_level/TCGA_METH_promoter_gene_beta_92.tsv
out_pathway_state	G:/vscode/newproject/escc/PAST_Fusion/data/processed/matrices_pathway_level/TCGA_Hallmark_METH_promoter_pathway_state_92.tsv
out_overlap	G:/vscode/newproject/escc/PAST_Fusion/results/qc/C01_04C_hallmark_methylation_pathway_overlap.tsv
C01_05_3omics_matrix_consistency_qc.tsv
metric	value
stage	C01-05
tcga_n_pathways_rna	50
tcga_n_pathways_cnv	50
tcga_n_pathways_meth	50
tcga_n_samples_rna	92
tcga_n_samples_cnv	92
tcga_n_samples_meth	92
gse53625_n_pathways_rna	50
gse53625_n_samples_rna	179
n_common_pathways_tcga_3omics	50
n_common_pathways_tcga_gse_expression	50
pre_pathway_identical_rna_cnv	TRUE
pre_pathway_identical_rna_meth	TRUE
pre_pathway_identical_rna_gse	TRUE
pre_sample_identical_rna_cnv	TRUE
pre_sample_identical_rna_meth	TRUE
post_pathway_identical_rna_cnv	TRUE
post_pathway_identical_rna_meth	TRUE
post_pathway_identical_rna_gse	TRUE
post_sample_identical_rna_cnv	TRUE
post_sample_identical_rna_meth	TRUE
tcga_sample_match_sample_manifest	TRUE
gse_sample_match_sample_manifest	TRUE
n_missing_rna	0
n_missing_cnv	0
n_missing_meth	0
n_missing_gse_rna	0
out_rna_frozen	G:/vscode/newproject/escc/PAST_Fusion/data/processed/matrices_pathway_level/frozen_C01_v1/TCGA_Hallmark_RNA_rank_activity_C01v1.tsv
out_cnv_frozen	G:/vscode/newproject/escc/PAST_Fusion/data/processed/matrices_pathway_level/frozen_C01_v1/TCGA_Hallmark_CNV_abs_burden_C01v1.tsv
out_meth_frozen	G:/vscode/newproject/escc/PAST_Fusion/data/processed/matrices_pathway_level/frozen_C01_v1/TCGA_Hallmark_METH_promoter_state_C01v1.tsv
out_gse_rna_frozen	G:/vscode/newproject/escc/PAST_Fusion/data/processed/matrices_pathway_level/frozen_C01_v1/GSE53625_Hallmark_RNA_rank_activity_C01v1.tsv
out_tensor_manifest	G:/vscode/newproject/escc/PAST_Fusion/metadata/C01_05_tcga_hallmark_3omics_tensor_manifest.tsv
out_common_pathways	G:/vscode/newproject/escc/PAST_Fusion/metadata/C01_05_common_hallmark_pathways.tsv
out_common_samples	G:/vscode/newproject/escc/PAST_Fusion/metadata/C01_05_common_tcga_samples.tsv
out_summary	G:/vscode/newproject/escc/PAST_Fusion/results/qc/C01_05_matrix_value_summary.tsv

## Sheet: S3_NestedCV_Modeling
Supplementary Data S3. Nested CV fold definitions, scaling plan, and modeling specifications
modeling_config.yaml
﻿project:
name: "PAST-Fusion_ESCC"
stage: "C02"
freeze_version: "B02_v1_C01_v1"
modeling_goal: "transport-first pathway-level multi-omics survival modeling"
cohorts:
training:
cohort_id: "TCGA_ESCA_ESCC_FC_B02v1"
n_samples: 92
endpoint: "overall_survival"
role: "model development and internal validation only"
deployment:
cohort_id: "GEO_GSE53625_DEP_B02v1"
n_samples: 179
endpoint: "overall_survival"
role: "transcriptome-only external deployment evaluation"
input_matrices:
tcga_rna:
path: "G:/vscode/newproject/escc/PAST_Fusion/data/processed/matrices_pathway_level/frozen_C01_v1/TCGA_Hallmark_RNA_rank_activity_C01v1.tsv"
type: "RNA_rank_pathway_activity"
n_pathways_expected: 50
n_samples_expected: 92
tcga_cnv:
path: "G:/vscode/newproject/escc/PAST_Fusion/data/processed/matrices_pathway_level/frozen_C01_v1/TCGA_Hallmark_CNV_abs_burden_C01v1.tsv"
type: "CNV_abs_pathway_burden"
n_pathways_expected: 50
n_samples_expected: 92
tcga_meth:
path: "G:/vscode/newproject/escc/PAST_Fusion/data/processed/matrices_pathway_level/frozen_C01_v1/TCGA_Hallmark_METH_promoter_state_C01v1.tsv"
type: "METH_promoter_pathway_state"
n_pathways_expected: 50
n_samples_expected: 92
gse53625_rna:
path: "G:/vscode/newproject/escc/PAST_Fusion/data/processed/matrices_pathway_level/frozen_C01_v1/GSE53625_Hallmark_RNA_rank_activity_C01v1.tsv"
type: "RNA_rank_pathway_activity"
n_pathways_expected: 50
n_samples_expected: 179
survival:
tcga_survival_file: "G:/vscode/newproject/escc/PAST_Fusion/metadata/B02_05B_tcga_fusion_core_with_survival_recovered.tsv"
time_column: "os_time_days"
event_column: "os_event"
valid_os_column: "valid_os"
event_coding:
death: 1
censored: 0
feature_space:
pathway_database: "MSigDB Hallmark"
n_pathways: 50
primary_feature_layers:
- "RNA_rank_activity"
- "CNV_abs_burden"
- "METH_promoter_state"
deployment_feature_layer:
- "RNA_rank_activity"
validation_design:
internal_validation: "nested_cross_validation"
outer_folds: 5
inner_folds: 5
repeat_times: 20
random_seed: 20260522
event_stratification: true
minimum_events_per_fold_warning: true
scaling_policy:
rule: "fold-specific scaling only"
training_fold_only: true
apply_training_parameters_to_validation_fold: true
apply_training_parameters_to_external_deployment: true
no_global_prescaling_before_cv: true
scale_by_modality: true
prohibited_operations:
- "No scaling on all 92 TCGA samples before cross-validation."
- "No feature selection using validation folds."
- "No hyperparameter tuning using outer validation folds."
- "No use of GSE53625 for feature selection."
- "No use of GSE53625 for hyperparameter tuning."
- "No optimal cutpoint search in GSE53625 as a primary result."
- "No clinical utility claim from current public-data-only evidence."
- "No mixing GSE53625 with GSE53624 or GSE53622 as independent validation cohorts."
primary_metrics:
- "C_index"
- "time_dependent_AUC"
- "calibration_slope"
- "integrated_Brier_score"
secondary_outputs:
- "training-defined median cutpoint KM"
- "risk distribution"
- "pathway stability frequency"
- "modality contribution summary"
model_spec_baseline.yaml
project:
name: "PAST-Fusion_ESCC"
stage: "C02-02"
purpose: "Freeze baseline survival model specifications before model training"
training_cohort: "TCGA_ESCA_ESCC_FC_B02v1"
deployment_cohort: "GEO_GSE53625_DEP_B02v1"
global_constraints:
evidence_level: "exploratory_methodological"
endpoint: "overall_survival"
survival_time_column: "os_time_days"
survival_event_column: "os_event"
event_coding:
death: 1
censored: 0
no_model_training_in_C02: true
no_global_prescaling_before_cv: true
no_external_feature_selection: true
no_external_hyperparameter_tuning: true
no_external_cutpoint_optimization: true
external_primary_output: "continuous_risk_score"
feature_layers:
RNA_rank_activity:
matrix_path: "G:/vscode/newproject/escc/PAST_Fusion/data/processed/matrices_pathway_level/frozen_C01_v1/TCGA_Hallmark_RNA_rank_activity_C01v1.tsv"
n_features: 50
deployment_available: true
deployment_matrix_path: "G:/vscode/newproject/escc/PAST_Fusion/data/processed/matrices_pathway_level/frozen_C01_v1/GSE53625_Hallmark_RNA_rank_activity_C01v1.tsv"
CNV_abs_burden:
matrix_path: "G:/vscode/newproject/escc/PAST_Fusion/data/processed/matrices_pathway_level/frozen_C01_v1/TCGA_Hallmark_CNV_abs_burden_C01v1.tsv"
n_features: 50
deployment_available: false
METH_promoter_state:
matrix_path: "G:/vscode/newproject/escc/PAST_Fusion/data/processed/matrices_pathway_level/frozen_C01_v1/TCGA_Hallmark_METH_promoter_state_C01v1.tsv"
n_features: 50
deployment_available: false
models:
M0_null_baseline:
model_family: "cox_null_or_offset_free_baseline"
feature_layers: []
n_features_expected: 0
role: "sanity_check_only"
external_deployment: false
tuning: "none"
M1_RNA_ridge:
model_family: "cox_ridge"
feature_layers:
- "RNA_rank_activity"
n_features_expected: 50
role: "primary transcriptome-only baseline and deployment head"
external_deployment: true
tuning: "inner_cv_lambda_only"
alpha: 0
M2_RNA_CNV_ridge:
model_family: "cox_ridge"
feature_layers:
- "RNA_rank_activity"
- "CNV_abs_burden"
n_features_expected: 100
role: "two-modality exploratory comparison"
external_deployment: false
tuning: "inner_cv_lambda_only"
alpha: 0
M3_RNA_CNV_METH_ridge:
model_family: "cox_ridge"
feature_layers:
- "RNA_rank_activity"
- "CNV_abs_burden"
- "METH_promoter_state"
n_features_expected: 150
role: "three-modality exploratory PAST-Fusion candidate"
external_deployment: false
tuning: "inner_cv_lambda_only"
alpha: 0
hyperparameter_policy:
allowed_model_family:
- "cox_null_or_offset_free_baseline"
- "cox_ridge"
prohibited_model_family:
- "lasso_feature_selection_primary"
- "elastic_net_feature_selection_primary"
- "random_survival_forest_primary"
- "deep_survival_model_primary"
lambda_selection: "inner_cv_only"
alpha_policy: "ridge_only_alpha_0_in_baseline"
feature_selection: "none_in_baseline_models"
comparison_policy:
primary_internal_comparison:
- "M0_null_baseline"
- "M1_RNA_ridge"
- "M2_RNA_CNV_ridge"
- "M3_RNA_CNV_METH_ridge"
primary_external_deployment:
- "M1_RNA_ridge"
metrics:
internal:
- "C_index"
- "integrated_Brier_score_if_available"
- "time_dependent_AUC_if_available"
external:
- "continuous_risk_C_index"
- "training_defined_cutpoint_KM_secondary_only"
reporting_boundary:
- "Report M1 external deployment as transcriptome-only transportability."
- "Do not claim M2 or M3 external validation in GSE53625 because CNV and methylation are unavailable."
- "Do not interpret selected individual pathways as validated biomarkers."
C02_01_nested_cv_split_qc.tsv
metric	value
stage	C02-01
decision	PASS
fail_reasons	none
n_samples	92
n_events	31
n_censored	61
outer_folds	5
inner_folds	5
repeat_times	20
outer_assignment_rows	1840
inner_assignment_rows	7360
scaling_plan_rows	1800
outer_min_validation_events	6
outer_max_validation_events	7
inner_min_validation_events	4
inner_max_validation_events	5
outer_zero_event_folds	0
inner_zero_event_folds	0
outer_event_warning	FALSE
inner_event_warning	FALSE
base_seed	20260522
out_outer	G:/vscode/newproject/escc/PAST_Fusion/metadata/C02_01_nested_cv_outer_folds.tsv
out_inner	G:/vscode/newproject/escc/PAST_Fusion/metadata/C02_01_nested_cv_inner_folds.tsv
out_scaling	G:/vscode/newproject/escc/PAST_Fusion/metadata/C02_01_fold_specific_scaling_plan.tsv
out_event_detail	G:/vscode/newproject/escc/PAST_Fusion/results/qc/C02_01_nested_cv_event_distribution_detail.tsv
C02_01_fold_specific_scaling_plan.tsv
split_level	repeat_id	outer_fold	inner_fold	modality	matrix_id	scaling_method	estimate_parameters_on	apply_parameters_to	n_estimation_samples	n_application_samples	estimation_sample_ids	application_sample_ids	leakage_status
outer	1	1		RNA_rank_activity	TCGA_Hallmark_RNA_rank_activity_C01v1	z_score	outer_training_samples_only	outer_validation_samples	72	20	TCGA-IG-A3QL-01;TCGA-IG-A3Y9-01;TCGA-IG-A3YA-01;TCGA-IG-A4QT-01;TCGA-IG-A50L-01;TCGA-IG-A51D-01;TCGA-IG-A5B8-01;TCGA-IG-A625-01;TCGA-IG-A6QS-01;TCGA-IG-A8O2-01;TCGA-IG-A97H-01;TCGA-JY-A6FD-01;TCGA-JY-A6FE-01;TCGA-JY-A6FG-01;TCGA-JY-A93F-01;TCGA-L5-A43H-01;TCGA-L5-A4OM-01;TCGA-L5-A88S-01;TCGA-L5-A88W-01;TCGA-L5-A88Z-01;TCGA-L5-A8NK-01;TCGA-L7-A56G-01;TCGA-LN-A49M-01;TCGA-LN-A49N-01;TCGA-LN-A49O-01…	TCGA-IG-A3I8-01;TCGA-IG-A3YB-01;TCGA-IG-A4P3-01;TCGA-IG-A5S3-01;TCGA-IG-A97I-01;TCGA-JY-A6FA-01;TCGA-KH-A6WC-01;TCGA-L5-A8NQ-01;TCGA-LN-A49K-01;TCGA-LN-A49L-01;TCGA-LN-A49U-01;TCGA-LN-A4A3-01;TCGA-LN-A4A4-01;TCGA-LN-A4MR-01;TCGA-LN-A9FO-01;TCGA-V5-A7RC-01;TCGA-VR-A8EO-01;TCGA-VR-A8EP-01;TCGA-VR-A8EZ-01;TCGA-Z6-A8JD-01	no_validation_or_external_data_used
outer	1	1		CNV_abs_burden	TCGA_Hallmark_CNV_abs_burden_C01v1	z_score	outer_training_samples_only	outer_validation_samples	72	20	TCGA-IG-A3QL-01;TCGA-IG-A3Y9-01;TCGA-IG-A3YA-01;TCGA-IG-A4QT-01;TCGA-IG-A50L-01;TCGA-IG-A51D-01;TCGA-IG-A5B8-01;TCGA-IG-A625-01;TCGA-IG-A6QS-01;TCGA-IG-A8O2-01;TCGA-IG-A97H-01;TCGA-JY-A6FD-01;TCGA-JY-A6FE-01;TCGA-JY-A6FG-01;TCGA-JY-A93F-01;TCGA-L5-A43H-01;TCGA-L5-A4OM-01;TCGA-L5-A88S-01;TCGA-L5-A88W-01;TCGA-L5-A88Z-01;TCGA-L5-A8NK-01;TCGA-L7-A56G-01;TCGA-LN-A49M-01;TCGA-LN-A49N-01;TCGA-LN-A49O-01…	TCGA-IG-A3I8-01;TCGA-IG-A3YB-01;TCGA-IG-A4P3-01;TCGA-IG-A5S3-01;TCGA-IG-A97I-01;TCGA-JY-A6FA-01;TCGA-KH-A6WC-01;TCGA-L5-A8NQ-01;TCGA-LN-A49K-01;TCGA-LN-A49L-01;TCGA-LN-A49U-01;TCGA-LN-A4A3-01;TCGA-LN-A4A4-01;TCGA-LN-A4MR-01;TCGA-LN-A9FO-01;TCGA-V5-A7RC-01;TCGA-VR-A8EO-01;TCGA-VR-A8EP-01;TCGA-VR-A8EZ-01;TCGA-Z6-A8JD-01	no_validation_or_external_data_used
outer	1	1		METH_promoter_state	TCGA_Hallmark_METH_promoter_state_C01v1	z_score	outer_training_samples_only	outer_validation_samples	72	20	TCGA-IG-A3QL-01;TCGA-IG-A3Y9-01;TCGA-IG-A3YA-01;TCGA-IG-A4QT-01;TCGA-IG-A50L-01;TCGA-IG-A51D-01;TCGA-IG-A5B8-01;TCGA-IG-A625-01;TCGA-IG-A6QS-01;TCGA-IG-A8O2-01;TCGA-IG-A97H-01;TCGA-JY-A6FD-01;TCGA-JY-A6FE-01;TCGA-JY-A6FG-01;TCGA-JY-A93F-01;TCGA-L5-A43H-01;TCGA-L5-A4OM-01;TCGA-L5-A88S-01;TCGA-L5-A88W-01;TCGA-L5-A88Z-01;TCGA-L5-A8NK-01;TCGA-L7-A56G-01;TCGA-LN-A49M-01;TCGA-LN-A49N-01;TCGA-LN-A49O-01…	TCGA-IG-A3I8-01;TCGA-IG-A3YB-01;TCGA-IG-A4P3-01;TCGA-IG-A5S3-01;TCGA-IG-A97I-01;TCGA-JY-A6FA-01;TCGA-KH-A6WC-01;TCGA-L5-A8NQ-01;TCGA-LN-A49K-01;TCGA-LN-A49L-01;TCGA-LN-A49U-01;TCGA-LN-A4A3-01;TCGA-LN-A4A4-01;TCGA-LN-A4MR-01;TCGA-LN-A9FO-01;TCGA-V5-A7RC-01;TCGA-VR-A8EO-01;TCGA-VR-A8EP-01;TCGA-VR-A8EZ-01;TCGA-Z6-A8JD-01	no_validation_or_external_data_used
outer	1	2		RNA_rank_activity	TCGA_Hallmark_RNA_rank_activity_C01v1	z_score	outer_training_samples_only	outer_validation_samples	74	18	TCGA-IG-A3I8-01;TCGA-IG-A3YA-01;TCGA-IG-A3YB-01;TCGA-IG-A4P3-01;TCGA-IG-A4QT-01;TCGA-IG-A50L-01;TCGA-IG-A51D-01;TCGA-IG-A5B8-01;TCGA-IG-A5S3-01;TCGA-IG-A6QS-01;TCGA-IG-A8O2-01;TCGA-IG-A97I-01;TCGA-JY-A6FA-01;TCGA-JY-A6FD-01;TCGA-JY-A6FE-01;TCGA-JY-A93F-01;TCGA-KH-A6WC-01;TCGA-L5-A88S-01;TCGA-L5-A88W-01;TCGA-L5-A8NQ-01;TCGA-L7-A56G-01;TCGA-LN-A49K-01;TCGA-LN-A49L-01;TCGA-LN-A49N-01;TCGA-LN-A49O-01…	TCGA-IG-A3QL-01;TCGA-IG-A3Y9-01;TCGA-IG-A625-01;TCGA-IG-A97H-01;TCGA-JY-A6FG-01;TCGA-L5-A43H-01;TCGA-L5-A4OM-01;TCGA-L5-A88Z-01;TCGA-L5-A8NK-01;TCGA-LN-A49M-01;TCGA-LN-A49P-01;TCGA-LN-A49X-01;TCGA-LN-A4A6-01;TCGA-LN-A5U5-01;TCGA-LN-A7HV-01;TCGA-LN-A9FP-01;TCGA-LN-A9FR-01;TCGA-VR-AA7B-01	no_validation_or_external_data_used
outer	1	2		CNV_abs_burden	TCGA_Hallmark_CNV_abs_burden_C01v1	z_score	outer_training_samples_only	outer_validation_samples	74	18	TCGA-IG-A3I8-01;TCGA-IG-A3YA-01;TCGA-IG-A3YB-01;TCGA-IG-A4P3-01;TCGA-IG-A4QT-01;TCGA-IG-A50L-01;TCGA-IG-A51D-01;TCGA-IG-A5B8-01;TCGA-IG-A5S3-01;TCGA-IG-A6QS-01;TCGA-IG-A8O2-01;TCGA-IG-A97I-01;TCGA-JY-A6FA-01;TCGA-JY-A6FD-01;TCGA-JY-A6FE-01;TCGA-JY-A93F-01;TCGA-KH-A6WC-01;TCGA-L5-A88S-01;TCGA-L5-A88W-01;TCGA-L5-A8NQ-01;TCGA-L7-A56G-01;TCGA-LN-A49K-01;TCGA-LN-A49L-01;TCGA-LN-A49N-01;TCGA-LN-A49O-01…	TCGA-IG-A3QL-01;TCGA-IG-A3Y9-01;TCGA-IG-A625-01;TCGA-IG-A97H-01;TCGA-JY-A6FG-01;TCGA-L5-A43H-01;TCGA-L5-A4OM-01;TCGA-L5-A88Z-01;TCGA-L5-A8NK-01;TCGA-LN-A49M-01;TCGA-LN-A49P-01;TCGA-LN-A49X-01;TCGA-LN-A4A6-01;TCGA-LN-A5U5-01;TCGA-LN-A7HV-01;TCGA-LN-A9FP-01;TCGA-LN-A9FR-01;TCGA-VR-AA7B-01	no_validation_or_external_data_used
outer	1	2		METH_promoter_state	TCGA_Hallmark_METH_promoter_state_C01v1	z_score	outer_training_samples_only	outer_validation_samples	74	18	TCGA-IG-A3I8-01;TCGA-IG-A3YA-01;TCGA-IG-A3YB-01;TCGA-IG-A4P3-01;TCGA-IG-A4QT-01;TCGA-IG-A50L-01;TCGA-IG-A51D-01;TCGA-IG-A5B8-01;TCGA-IG-A5S3-01;TCGA-IG-A6QS-01;TCGA-IG-A8O2-01;TCGA-IG-A97I-01;TCGA-JY-A6FA-01;TCGA-JY-A6FD-01;TCGA-JY-A6FE-01;TCGA-JY-A93F-01;TCGA-KH-A6WC-01;TCGA-L5-A88S-01;TCGA-L5-A88W-01;TCGA-L5-A8NQ-01;TCGA-L7-A56G-01;TCGA-LN-A49K-01;TCGA-LN-A49L-01;TCGA-LN-A49N-01;TCGA-LN-A49O-01…	TCGA-IG-A3QL-01;TCGA-IG-A3Y9-01;TCGA-IG-A625-01;TCGA-IG-A97H-01;TCGA-JY-A6FG-01;TCGA-L5-A43H-01;TCGA-L5-A4OM-01;TCGA-L5-A88Z-01;TCGA-L5-A8NK-01;TCGA-LN-A49M-01;TCGA-LN-A49P-01;TCGA-LN-A49X-01;TCGA-LN-A4A6-01;TCGA-LN-A5U5-01;TCGA-LN-A7HV-01;TCGA-LN-A9FP-01;TCGA-LN-A9FR-01;TCGA-VR-AA7B-01	no_validation_or_external_data_used
outer	1	3		RNA_rank_activity	TCGA_Hallmark_RNA_rank_activity_C01v1	z_score	outer_training_samples_only	outer_validation_samples	74	18	TCGA-IG-A3I8-01;TCGA-IG-A3QL-01;TCGA-IG-A3Y9-01;TCGA-IG-A3YB-01;TCGA-IG-A4P3-01;TCGA-IG-A4QT-01;TCGA-IG-A5B8-01;TCGA-IG-A5S3-01;TCGA-IG-A625-01;TCGA-IG-A8O2-01;TCGA-IG-A97H-01;TCGA-IG-A97I-01;TCGA-JY-A6FA-01;TCGA-JY-A6FD-01;TCGA-JY-A6FG-01;TCGA-KH-A6WC-01;TCGA-L5-A43H-01;TCGA-L5-A4OM-01;TCGA-L5-A88S-01;TCGA-L5-A88W-01;TCGA-L5-A88Z-01;TCGA-L5-A8NK-01;TCGA-L5-A8NQ-01;TCGA-LN-A49K-01;TCGA-LN-A49L-01…	TCGA-IG-A3YA-01;TCGA-IG-A50L-01;TCGA-IG-A51D-01;TCGA-IG-A6QS-01;TCGA-JY-A6FE-01;TCGA-JY-A93F-01;TCGA-L7-A56G-01;TCGA-LN-A49R-01;TCGA-LN-A4A1-01;TCGA-LN-A4A2-01;TCGA-LN-A4A8-01;TCGA-LN-A4A9-01;TCGA-LN-A7HW-01;TCGA-LN-A7HY-01;TCGA-VR-A8EU-01;TCGA-VR-AA7I-01;TCGA-Z6-A8JE-01;TCGA-Z6-A9VB-01	no_validation_or_external_data_used
outer	1	3		CNV_abs_burden	TCGA_Hallmark_CNV_abs_burden_C01v1	z_score	outer_training_samples_only	outer_validation_samples	74	18	TCGA-IG-A3I8-01;TCGA-IG-A3QL-01;TCGA-IG-A3Y9-01;TCGA-IG-A3YB-01;TCGA-IG-A4P3-01;TCGA-IG-A4QT-01;TCGA-IG-A5B8-01;TCGA-IG-A5S3-01;TCGA-IG-A625-01;TCGA-IG-A8O2-01;TCGA-IG-A97H-01;TCGA-IG-A97I-01;TCGA-JY-A6FA-01;TCGA-JY-A6FD-01;TCGA-JY-A6FG-01;TCGA-KH-A6WC-01;TCGA-L5-A43H-01;TCGA-L5-A4OM-01;TCGA-L5-A88S-01;TCGA-L5-A88W-01;TCGA-L5-A88Z-01;TCGA-L5-A8NK-01;TCGA-L5-A8NQ-01;TCGA-LN-A49K-01;TCGA-LN-A49L-01…	TCGA-IG-A3YA-01;TCGA-IG-A50L-01;TCGA-IG-A51D-01;TCGA-IG-A6QS-01;TCGA-JY-A6FE-01;TCGA-JY-A93F-01;TCGA-L7-A56G-01;TCGA-LN-A49R-01;TCGA-LN-A4A1-01;TCGA-LN-A4A2-01;TCGA-LN-A4A8-01;TCGA-LN-A4A9-01;TCGA-LN-A7HW-01;TCGA-LN-A7HY-01;TCGA-VR-A8EU-01;TCGA-VR-AA7I-01;TCGA-Z6-A8JE-01;TCGA-Z6-A9VB-01	no_validation_or_external_data_used
outer	1	3		METH_promoter_state	TCGA_Hallmark_METH_promoter_state_C01v1	z_score	outer_training_samples_only	outer_validation_samples	74	18	TCGA-IG-A3I8-01;TCGA-IG-A3QL-01;TCGA-IG-A3Y9-01;TCGA-IG-A3YB-01;TCGA-IG-A4P3-01;TCGA-IG-A4QT-01;TCGA-IG-A5B8-01;TCGA-IG-A5S3-01;TCGA-IG-A625-01;TCGA-IG-A8O2-01;TCGA-IG-A97H-01;TCGA-IG-A97I-01;TCGA-JY-A6FA-01;TCGA-JY-A6FD-01;TCGA-JY-A6FG-01;TCGA-KH-A6WC-01;TCGA-L5-A43H-01;TCGA-L5-A4OM-01;TCGA-L5-A88S-01;TCGA-L5-A88W-01;TCGA-L5-A88Z-01;TCGA-L5-A8NK-01;TCGA-L5-A8NQ-01;TCGA-LN-A49K-01;TCGA-LN-A49L-01…	TCGA-IG-A3YA-01;TCGA-IG-A50L-01;TCGA-IG-A51D-01;TCGA-IG-A6QS-01;TCGA-JY-A6FE-01;TCGA-JY-A93F-01;TCGA-L7-A56G-01;TCGA-LN-A49R-01;TCGA-LN-A4A1-01;TCGA-LN-A4A2-01;TCGA-LN-A4A8-01;TCGA-LN-A4A9-01;TCGA-LN-A7HW-01;TCGA-LN-A7HY-01;TCGA-VR-A8EU-01;TCGA-VR-AA7I-01;TCGA-Z6-A8JE-01;TCGA-Z6-A9VB-01	no_validation_or_external_data_used
outer	1	4		RNA_rank_activity	TCGA_Hallmark_RNA_rank_activity_C01v1	z_score	outer_training_samples_only	outer_validation_samples	74	18	TCGA-IG-A3I8-01;TCGA-IG-A3QL-01;TCGA-IG-A3Y9-01;TCGA-IG-A3YA-01;TCGA-IG-A3YB-01;TCGA-IG-A4P3-01;TCGA-IG-A50L-01;TCGA-IG-A51D-01;TCGA-IG-A5S3-01;TCGA-IG-A625-01;TCGA-IG-A6QS-01;TCGA-IG-A97H-01;TCGA-IG-A97I-01;TCGA-JY-A6FA-01;TCGA-JY-A6FD-01;TCGA-JY-A6FE-01;TCGA-JY-A6FG-01;TCGA-JY-A93F-01;TCGA-KH-A6WC-01;TCGA-L5-A43H-01;TCGA-L5-A4OM-01;TCGA-L5-A88S-01;TCGA-L5-A88W-01;TCGA-L5-A88Z-01;TCGA-L5-A8NK-01…	TCGA-IG-A4QT-01;TCGA-IG-A5B8-01;TCGA-IG-A8O2-01;TCGA-LN-A49N-01;TCGA-LN-A49O-01;TCGA-LN-A49S-01;TCGA-LN-A49W-01;TCGA-LN-A49Y-01;TCGA-LN-A7HX-01;TCGA-LN-A8I0-01;TCGA-LN-A8I1-01;TCGA-LN-A9FQ-01;TCGA-V5-AASV-01;TCGA-VR-A8ER-01;TCGA-VR-A8EW-01;TCGA-VR-A8EX-01;TCGA-VR-AA4G-01;TCGA-Z6-AAPN-01	no_validation_or_external_data_used
outer	1	4		CNV_abs_burden	TCGA_Hallmark_CNV_abs_burden_C01v1	z_score	outer_training_samples_only	outer_validation_samples	74	18	TCGA-IG-A3I8-01;TCGA-IG-A3QL-01;TCGA-IG-A3Y9-01;TCGA-IG-A3YA-01;TCGA-IG-A3YB-01;TCGA-IG-A4P3-01;TCGA-IG-A50L-01;TCGA-IG-A51D-01;TCGA-IG-A5S3-01;TCGA-IG-A625-01;TCGA-IG-A6QS-01;TCGA-IG-A97H-01;TCGA-IG-A97I-01;TCGA-JY-A6FA-01;TCGA-JY-A6FD-01;TCGA-JY-A6FE-01;TCGA-JY-A6FG-01;TCGA-JY-A93F-01;TCGA-KH-A6WC-01;TCGA-L5-A43H-01;TCGA-L5-A4OM-01;TCGA-L5-A88S-01;TCGA-L5-A88W-01;TCGA-L5-A88Z-01;TCGA-L5-A8NK-01…	TCGA-IG-A4QT-01;TCGA-IG-A5B8-01;TCGA-IG-A8O2-01;TCGA-LN-A49N-01;TCGA-LN-A49O-01;TCGA-LN-A49S-01;TCGA-LN-A49W-01;TCGA-LN-A49Y-01;TCGA-LN-A7HX-01;TCGA-LN-A8I0-01;TCGA-LN-A8I1-01;TCGA-LN-A9FQ-01;TCGA-V5-AASV-01;TCGA-VR-A8ER-01;TCGA-VR-A8EW-01;TCGA-VR-A8EX-01;TCGA-VR-AA4G-01;TCGA-Z6-AAPN-01	no_validation_or_external_data_used
outer	1	4		METH_promoter_state	TCGA_Hallmark_METH_promoter_state_C01v1	z_score	outer_training_samples_only	outer_validation_samples	74	18	TCGA-IG-A3I8-01;TCGA-IG-A3QL-01;TCGA-IG-A3Y9-01;TCGA-IG-A3YA-01;TCGA-IG-A3YB-01;TCGA-IG-A4P3-01;TCGA-IG-A50L-01;TCGA-IG-A51D-01;TCGA-IG-A5S3-01;TCGA-IG-A625-01;TCGA-IG-A6QS-01;TCGA-IG-A97H-01;TCGA-IG-A97I-01;TCGA-JY-A6FA-01;TCGA-JY-A6FD-01;TCGA-JY-A6FE-01;TCGA-JY-A6FG-01;TCGA-JY-A93F-01;TCGA-KH-A6WC-01;TCGA-L5-A43H-01;TCGA-L5-A4OM-01;TCGA-L5-A88S-01;TCGA-L5-A88W-01;TCGA-L5-A88Z-01;TCGA-L5-A8NK-01…	TCGA-IG-A4QT-01;TCGA-IG-A5B8-01;TCGA-IG-A8O2-01;TCGA-LN-A49N-01;TCGA-LN-A49O-01;TCGA-LN-A49S-01;TCGA-LN-A49W-01;TCGA-LN-A49Y-01;TCGA-LN-A7HX-01;TCGA-LN-A8I0-01;TCGA-LN-A8I1-01;TCGA-LN-A9FQ-01;TCGA-V5-AASV-01;TCGA-VR-A8ER-01;TCGA-VR-A8EW-01;TCGA-VR-A8EX-01;TCGA-VR-AA4G-01;TCGA-Z6-AAPN-01	no_validation_or_external_data_used
outer	1	5		RNA_rank_activity	TCGA_Hallmark_RNA_rank_activity_C01v1	z_score	outer_training_samples_only	outer_validation_samples	74	18	TCGA-IG-A3I8-01;TCGA-IG-A3QL-01;TCGA-IG-A3Y9-01;TCGA-IG-A3YA-01;TCGA-IG-A3YB-01;TCGA-IG-A4P3-01;TCGA-IG-A4QT-01;TCGA-IG-A50L-01;TCGA-IG-A51D-01;TCGA-IG-A5B8-01;TCGA-IG-A5S3-01;TCGA-IG-A625-01;TCGA-IG-A6QS-01;TCGA-IG-A8O2-01;TCGA-IG-A97H-01;TCGA-IG-A97I-01;TCGA-JY-A6FA-01;TCGA-JY-A6FE-01;TCGA-JY-A6FG-01;TCGA-JY-A93F-01;TCGA-KH-A6WC-01;TCGA-L5-A43H-01;TCGA-L5-A4OM-01;TCGA-L5-A88Z-01;TCGA-L5-A8NK-01…	TCGA-JY-A6FD-01;TCGA-L5-A88S-01;TCGA-L5-A88W-01;TCGA-LN-A49V-01;TCGA-LN-A4A5-01;TCGA-LN-A4MQ-01;TCGA-LN-A5U6-01;TCGA-LN-A5U7-01;TCGA-LN-A7HZ-01;TCGA-LN-A8HZ-01;TCGA-Q9-A6FU-01;TCGA-S8-A6BW-01;TCGA-VR-A8ET-01;TCGA-VR-A8EY-01;TCGA-VR-A8Q7-01;TCGA-VR-AA7D-01;TCGA-XP-A8T6-01;TCGA-XP-A8T8-01	no_validation_or_external_data_used
outer	1	5		CNV_abs_burden	TCGA_Hallmark_CNV_abs_burden_C01v1	z_score	outer_training_samples_only	outer_validation_samples	74	18	TCGA-IG-A3I8-01;TCGA-IG-A3QL-01;TCGA-IG-A3Y9-01;TCGA-IG-A3YA-01;TCGA-IG-A3YB-01;TCGA-IG-A4P3-01;TCGA-IG-A4QT-01;TCGA-IG-A50L-01;TCGA-IG-A51D-01;TCGA-IG-A5B8-01;TCGA-IG-A5S3-01;TCGA-IG-A625-01;TCGA-IG-A6QS-01;TCGA-IG-A8O2-01;TCGA-IG-A97H-01;TCGA-IG-A97I-01;TCGA-JY-A6FA-01;TCGA-JY-A6FE-01;TCGA-JY-A6FG-01;TCGA-JY-A93F-01;TCGA-KH-A6WC-01;TCGA-L5-A43H-01;TCGA-L5-A4OM-01;TCGA-L5-A88Z-01;TCGA-L5-A8NK-01…	TCGA-JY-A6FD-01;TCGA-L5-A88S-01;TCGA-L5-A88W-01;TCGA-LN-A49V-01;TCGA-LN-A4A5-01;TCGA-LN-A4MQ-01;TCGA-LN-A5U6-01;TCGA-LN-A5U7-01;TCGA-LN-A7HZ-01;TCGA-LN-A8HZ-01;TCGA-Q9-A6FU-01;TCGA-S8-A6BW-01;TCGA-VR-A8ET-01;TCGA-VR-A8EY-01;TCGA-VR-A8Q7-01;TCGA-VR-AA7D-01;TCGA-XP-A8T6-01;TCGA-XP-A8T8-01	no_validation_or_external_data_used
outer	1	5		METH_promoter_state	TCGA_Hallmark_METH_promoter_state_C01v1	z_score	outer_training_samples_only	outer_validation_samples	74	18	TCGA-IG-A3I8-01;TCGA-IG-A3QL-01;TCGA-IG-A3Y9-01;TCGA-IG-A3YA-01;TCGA-IG-A3YB-01;TCGA-IG-A4P3-01;TCGA-IG-A4QT-01;TCGA-IG-A50L-01;TCGA-IG-A51D-01;TCGA-IG-A5B8-01;TCGA-IG-A5S3-01;TCGA-IG-A625-01;TCGA-IG-A6QS-01;TCGA-IG-A8O2-01;TCGA-IG-A97H-01;TCGA-IG-A97I-01;TCGA-JY-A6FA-01;TCGA-JY-A6FE-01;TCGA-JY-A6FG-01;TCGA-JY-A93F-01;TCGA-KH-A6WC-01;TCGA-L5-A43H-01;TCGA-L5-A4OM-01;TCGA-L5-A88Z-01;TCGA-L5-A8NK-01…	TCGA-JY-A6FD-01;TCGA-L5-A88S-01;TCGA-L5-A88W-01;TCGA-LN-A49V-01;TCGA-LN-A4A5-01;TCGA-LN-A4MQ-01;TCGA-LN-A5U6-01;TCGA-LN-A5U7-01;TCGA-LN-A7HZ-01;TCGA-LN-A8HZ-01;TCGA-Q9-A6FU-01;TCGA-S8-A6BW-01;TCGA-VR-A8ET-01;TCGA-VR-A8EY-01;TCGA-VR-A8Q7-01;TCGA-VR-AA7D-01;TCGA-XP-A8T6-01;TCGA-XP-A8T8-01	no_validation_or_external_data_used
outer	2	1		RNA_rank_activity	TCGA_Hallmark_RNA_rank_activity_C01v1	z_score	outer_training_samples_only	outer_validation_samples	72	20	TCGA-IG-A3I8-01;TCGA-IG-A3QL-01;TCGA-IG-A3Y9-01;TCGA-IG-A3YA-01;TCGA-IG-A4P3-01;TCGA-IG-A4QT-01;TCGA-IG-A50L-01;TCGA-IG-A51D-01;TCGA-IG-A5B8-01;TCGA-IG-A5S3-01;TCGA-IG-A6QS-01;TCGA-IG-A8O2-01;TCGA-IG-A97H-01;TCGA-JY-A6FD-01;TCGA-JY-A6FE-01;TCGA-JY-A6FG-01;TCGA-JY-A93F-01;TCGA-KH-A6WC-01;TCGA-L5-A43H-01;TCGA-L5-A4OM-01;TCGA-L5-A88S-01;TCGA-L5-A88W-01;TCGA-L5-A88Z-01;TCGA-L5-A8NK-01;TCGA-L7-A56G-01…	TCGA-IG-A3YB-01;TCGA-IG-A625-01;TCGA-IG-A97I-01;TCGA-JY-A6FA-01;TCGA-L5-A8NQ-01;TCGA-LN-A49V-01;TCGA-LN-A49X-01;TCGA-LN-A49Y-01;TCGA-LN-A4MR-01;TCGA-LN-A7HV-01;TCGA-LN-A9FP-01;TCGA-LN-A9FQ-01;TCGA-LN-A9FR-01;TCGA-Q9-A6FU-01;TCGA-S8-A6BW-01;TCGA-VR-A8ET-01;TCGA-VR-A8Q7-01;TCGA-VR-AA7D-01;TCGA-VR-AA7I-01;TCGA-Z6-A8JE-01	no_validation_or_external_data_used
outer	2	1		CNV_abs_burden	TCGA_Hallmark_CNV_abs_burden_C01v1	z_score	outer_training_samples_only	outer_validation_samples	72	20	TCGA-IG-A3I8-01;TCGA-IG-A3QL-01;TCGA-IG-A3Y9-01;TCGA-IG-A3YA-01;TCGA-IG-A4P3-01;TCGA-IG-A4QT-01;TCGA-IG-A50L-01;TCGA-IG-A51D-01;TCGA-IG-A5B8-01;TCGA-IG-A5S3-01;TCGA-IG-A6QS-01;TCGA-IG-A8O2-01;TCGA-IG-A97H-01;TCGA-JY-A6FD-01;TCGA-JY-A6FE-01;TCGA-JY-A6FG-01;TCGA-JY-A93F-01;TCGA-KH-A6WC-01;TCGA-L5-A43H-01;TCGA-L5-A4OM-01;TCGA-L5-A88S-01;TCGA-L5-A88W-01;TCGA-L5-A88Z-01;TCGA-L5-A8NK-01;TCGA-L7-A56G-01…	TCGA-IG-A3YB-01;TCGA-IG-A625-01;TCGA-IG-A97I-01;TCGA-JY-A6FA-01;TCGA-L5-A8NQ-01;TCGA-LN-A49V-01;TCGA-LN-A49X-01;TCGA-LN-A49Y-01;TCGA-LN-A4MR-01;TCGA-LN-A7HV-01;TCGA-LN-A9FP-01;TCGA-LN-A9FQ-01;TCGA-LN-A9FR-01;TCGA-Q9-A6FU-01;TCGA-S8-A6BW-01;TCGA-VR-A8ET-01;TCGA-VR-A8Q7-01;TCGA-VR-AA7D-01;TCGA-VR-AA7I-01;TCGA-Z6-A8JE-01	no_validation_or_external_data_used
outer	2	1		METH_promoter_state	TCGA_Hallmark_METH_promoter_state_C01v1	z_score	outer_training_samples_only	outer_validation_samples	72	20	TCGA-IG-A3I8-01;TCGA-IG-A3QL-01;TCGA-IG-A3Y9-01;TCGA-IG-A3YA-01;TCGA-IG-A4P3-01;TCGA-IG-A4QT-01;TCGA-IG-A50L-01;TCGA-IG-A51D-01;TCGA-IG-A5B8-01;TCGA-IG-A5S3-01;TCGA-IG-A6QS-01;TCGA-IG-A8O2-01;TCGA-IG-A97H-01;TCGA-JY-A6FD-01;TCGA-JY-A6FE-01;TCGA-JY-A6FG-01;TCGA-JY-A93F-01;TCGA-KH-A6WC-01;TCGA-L5-A43H-01;TCGA-L5-A4OM-01;TCGA-L5-A88S-01;TCGA-L5-A88W-01;TCGA-L5-A88Z-01;TCGA-L5-A8NK-01;TCGA-L7-A56G-01…	TCGA-IG-A3YB-01;TCGA-IG-A625-01;TCGA-IG-A97I-01;TCGA-JY-A6FA-01;TCGA-L5-A8NQ-01;TCGA-LN-A49V-01;TCGA-LN-A49X-01;TCGA-LN-A49Y-01;TCGA-LN-A4MR-01;TCGA-LN-A7HV-01;TCGA-LN-A9FP-01;TCGA-LN-A9FQ-01;TCGA-LN-A9FR-01;TCGA-Q9-A6FU-01;TCGA-S8-A6BW-01;TCGA-VR-A8ET-01;TCGA-VR-A8Q7-01;TCGA-VR-AA7D-01;TCGA-VR-AA7I-01;TCGA-Z6-A8JE-01	no_validation_or_external_data_used
outer	2	2		RNA_rank_activity	TCGA_Hallmark_RNA_rank_activity_C01v1	z_score	outer_training_samples_only	outer_validation_samples	74	18	TCGA-IG-A3QL-01;TCGA-IG-A3Y9-01;TCGA-IG-A3YA-01;TCGA-IG-A3YB-01;TCGA-IG-A4P3-01;TCGA-IG-A4QT-01;TCGA-IG-A50L-01;TCGA-IG-A51D-01;TCGA-IG-A5S3-01;TCGA-IG-A625-01;TCGA-IG-A6QS-01;TCGA-IG-A8O2-01;TCGA-IG-A97H-01;TCGA-IG-A97I-01;TCGA-JY-A6FA-01;TCGA-JY-A6FE-01;TCGA-JY-A93F-01;TCGA-KH-A6WC-01;TCGA-L5-A88S-01;TCGA-L5-A88W-01;TCGA-L5-A88Z-01;TCGA-L5-A8NK-01;TCGA-L5-A8NQ-01;TCGA-LN-A49K-01;TCGA-LN-A49L-01…	TCGA-IG-A3I8-01;TCGA-IG-A5B8-01;TCGA-JY-A6FD-01;TCGA-JY-A6FG-01;TCGA-L5-A43H-01;TCGA-L5-A4OM-01;TCGA-L7-A56G-01;TCGA-LN-A49M-01;TCGA-LN-A49N-01;TCGA-LN-A5U6-01;TCGA-LN-A7HW-01;TCGA-LN-A7HX-01;TCGA-LN-A7HY-01;TCGA-LN-A8I1-01;TCGA-VR-A8EO-01;TCGA-VR-A8EZ-01;TCGA-VR-AA7B-01;TCGA-XP-A8T8-01	no_validation_or_external_data_used
outer	2	2		CNV_abs_burden	TCGA_Hallmark_CNV_abs_burden_C01v1	z_score	outer_training_samples_only	outer_validation_samples	74	18	TCGA-IG-A3QL-01;TCGA-IG-A3Y9-01;TCGA-IG-A3YA-01;TCGA-IG-A3YB-01;TCGA-IG-A4P3-01;TCGA-IG-A4QT-01;TCGA-IG-A50L-01;TCGA-IG-A51D-01;TCGA-IG-A5S3-01;TCGA-IG-A625-01;TCGA-IG-A6QS-01;TCGA-IG-A8O2-01;TCGA-IG-A97H-01;TCGA-IG-A97I-01;TCGA-JY-A6FA-01;TCGA-JY-A6FE-01;TCGA-JY-A93F-01;TCGA-KH-A6WC-01;TCGA-L5-A88S-01;TCGA-L5-A88W-01;TCGA-L5-A88Z-01;TCGA-L5-A8NK-01;TCGA-L5-A8NQ-01;TCGA-LN-A49K-01;TCGA-LN-A49L-01…	TCGA-IG-A3I8-01;TCGA-IG-A5B8-01;TCGA-JY-A6FD-01;TCGA-JY-A6FG-01;TCGA-L5-A43H-01;TCGA-L5-A4OM-01;TCGA-L7-A56G-01;TCGA-LN-A49M-01;TCGA-LN-A49N-01;TCGA-LN-A5U6-01;TCGA-LN-A7HW-01;TCGA-LN-A7HX-01;TCGA-LN-A7HY-01;TCGA-LN-A8I1-01;TCGA-VR-A8EO-01;TCGA-VR-A8EZ-01;TCGA-VR-AA7B-01;TCGA-XP-A8T8-01	no_validation_or_external_data_used
outer	2	2		METH_promoter_state	TCGA_Hallmark_METH_promoter_state_C01v1	z_score	outer_training_samples_only	outer_validation_samples	74	18	TCGA-IG-A3QL-01;TCGA-IG-A3Y9-01;TCGA-IG-A3YA-01;TCGA-IG-A3YB-01;TCGA-IG-A4P3-01;TCGA-IG-A4QT-01;TCGA-IG-A50L-01;TCGA-IG-A51D-01;TCGA-IG-A5S3-01;TCGA-IG-A625-01;TCGA-IG-A6QS-01;TCGA-IG-A8O2-01;TCGA-IG-A97H-01;TCGA-IG-A97I-01;TCGA-JY-A6FA-01;TCGA-JY-A6FE-01;TCGA-JY-A93F-01;TCGA-KH-A6WC-01;TCGA-L5-A88S-01;TCGA-L5-A88W-01;TCGA-L5-A88Z-01;TCGA-L5-A8NK-01;TCGA-L5-A8NQ-01;TCGA-LN-A49K-01;TCGA-LN-A49L-01…	TCGA-IG-A3I8-01;TCGA-IG-A5B8-01;TCGA-JY-A6FD-01;TCGA-JY-A6FG-01;TCGA-L5-A43H-01;TCGA-L5-A4OM-01;TCGA-L7-A56G-01;TCGA-LN-A49M-01;TCGA-LN-A49N-01;TCGA-LN-A5U6-01;TCGA-LN-A7HW-01;TCGA-LN-A7HX-01;TCGA-LN-A7HY-01;TCGA-LN-A8I1-01;TCGA-VR-A8EO-01;TCGA-VR-A8EZ-01;TCGA-VR-AA7B-01;TCGA-XP-A8T8-01	no_validation_or_external_data_used
outer	2	3		RNA_rank_activity	TCGA_Hallmark_RNA_rank_activity_C01v1	z_score	outer_training_samples_only	outer_validation_samples	74	18	TCGA-IG-A3I8-01;TCGA-IG-A3Y9-01;TCGA-IG-A3YB-01;TCGA-IG-A50L-01;TCGA-IG-A51D-01;TCGA-IG-A5B8-01;TCGA-IG-A5S3-01;TCGA-IG-A625-01;TCGA-IG-A6QS-01;TCGA-IG-A8O2-01;TCGA-IG-A97H-01;TCGA-IG-A97I-01;TCGA-JY-A6FA-01;TCGA-JY-A6FD-01;TCGA-JY-A6FG-01;TCGA-JY-A93F-01;TCGA-KH-A6WC-01;TCGA-L5-A43H-01;TCGA-L5-A4OM-01;TCGA-L5-A88S-01;TCGA-L5-A8NQ-01;TCGA-L7-A56G-01;TCGA-LN-A49K-01;TCGA-LN-A49L-01;TCGA-LN-A49M-01…	TCGA-IG-A3QL-01;TCGA-IG-A3YA-01;TCGA-IG-A4P3-01;TCGA-IG-A4QT-01;TCGA-JY-A6FE-01;TCGA-L5-A88W-01;TCGA-L5-A88Z-01;TCGA-L5-A8NK-01;TCGA-LN-A49S-01;TCGA-LN-A49W-01;TCGA-LN-A4A1-01;TCGA-LN-A4A8-01;TCGA-LN-A4MQ-01;TCGA-LN-A8I0-01;TCGA-LN-A9FO-01;TCGA-V5-A7RC-01;TCGA-VR-A8EX-01;TCGA-Z6-AAPN-01	no_validation_or_external_data_used
outer	2	3		CNV_abs_burden	TCGA_Hallmark_CNV_abs_burden_C01v1	z_score	outer_training_samples_only	outer_validation_samples	74	18	TCGA-IG-A3I8-01;TCGA-IG-A3Y9-01;TCGA-IG-A3YB-01;TCGA-IG-A50L-01;TCGA-IG-A51D-01;TCGA-IG-A5B8-01;TCGA-IG-A5S3-01;TCGA-IG-A625-01;TCGA-IG-A6QS-01;TCGA-IG-A8O2-01;TCGA-IG-A97H-01;TCGA-IG-A97I-01;TCGA-JY-A6FA-01;TCGA-JY-A6FD-01;TCGA-JY-A6FG-01;TCGA-JY-A93F-01;TCGA-KH-A6WC-01;TCGA-L5-A43H-01;TCGA-L5-A4OM-01;TCGA-L5-A88S-01;TCGA-L5-A8NQ-01;TCGA-L7-A56G-01;TCGA-LN-A49K-01;TCGA-LN-A49L-01;TCGA-LN-A49M-01…	TCGA-IG-A3QL-01;TCGA-IG-A3YA-01;TCGA-IG-A4P3-01;TCGA-IG-A4QT-01;TCGA-JY-A6FE-01;TCGA-L5-A88W-01;TCGA-L5-A88Z-01;TCGA-L5-A8NK-01;TCGA-LN-A49S-01;TCGA-LN-A49W-01;TCGA-LN-A4A1-01;TCGA-LN-A4A8-01;TCGA-LN-A4MQ-01;TCGA-LN-A8I0-01;TCGA-LN-A9FO-01;TCGA-V5-A7RC-01;TCGA-VR-A8EX-01;TCGA-Z6-AAPN-01	no_validation_or_external_data_used
outer	2	3		METH_promoter_state	TCGA_Hallmark_METH_promoter_state_C01v1	z_score	outer_training_samples_only	outer_validation_samples	74	18	TCGA-IG-A3I8-01;TCGA-IG-A3Y9-01;TCGA-IG-A3YB-01;TCGA-IG-A50L-01;TCGA-IG-A51D-01;TCGA-IG-A5B8-01;TCGA-IG-A5S3-01;TCGA-IG-A625-01;TCGA-IG-A6QS-01;TCGA-IG-A8O2-01;TCGA-IG-A97H-01;TCGA-IG-A97I-01;TCGA-JY-A6FA-01;TCGA-JY-A6FD-01;TCGA-JY-A6FG-01;TCGA-JY-A93F-01;TCGA-KH-A6WC-01;TCGA-L5-A43H-01;TCGA-L5-A4OM-01;TCGA-L5-A88S-01;TCGA-L5-A8NQ-01;TCGA-L7-A56G-01;TCGA-LN-A49K-01;TCGA-LN-A49L-01;TCGA-LN-A49M-01…	TCGA-IG-A3QL-01;TCGA-IG-A3YA-01;TCGA-IG-A4P3-01;TCGA-IG-A4QT-01;TCGA-JY-A6FE-01;TCGA-L5-A88W-01;TCGA-L5-A88Z-01;TCGA-L5-A8NK-01;TCGA-LN-A49S-01;TCGA-LN-A49W-01;TCGA-LN-A4A1-01;TCGA-LN-A4A8-01;TCGA-LN-A4MQ-01;TCGA-LN-A8I0-01;TCGA-LN-A9FO-01;TCGA-V5-A7RC-01;TCGA-VR-A8EX-01;TCGA-Z6-AAPN-01	no_validation_or_external_data_used
outer	2	4		RNA_rank_activity	TCGA_Hallmark_RNA_rank_activity_C01v1	z_score	outer_training_samples_only	outer_validation_samples	74	18	TCGA-IG-A3I8-01;TCGA-IG-A3QL-01;TCGA-IG-A3YA-01;TCGA-IG-A3YB-01;TCGA-IG-A4P3-01;TCGA-IG-A4QT-01;TCGA-IG-A51D-01;TCGA-IG-A5B8-01;TCGA-IG-A5S3-01;TCGA-IG-A625-01;TCGA-IG-A6QS-01;TCGA-IG-A8O2-01;TCGA-IG-A97I-01;TCGA-JY-A6FA-01;TCGA-JY-A6FD-01;TCGA-JY-A6FE-01;TCGA-JY-A6FG-01;TCGA-JY-A93F-01;TCGA-KH-A6WC-01;TCGA-L5-A43H-01;TCGA-L5-A4OM-01;TCGA-L5-A88S-01;TCGA-L5-A88W-01;TCGA-L5-A88Z-01;TCGA-L5-A8NK-01…	TCGA-IG-A3Y9-01;TCGA-IG-A50L-01;TCGA-IG-A97H-01;TCGA-LN-A49U-01;TCGA-LN-A4A2-01;TCGA-LN-A4A3-01;TCGA-LN-A4A5-01;TCGA-LN-A4A9-01;TCGA-LN-A5U7-01;TCGA-LN-A7HZ-01;TCGA-V5-AASV-01;TCGA-VR-A8ER-01;TCGA-VR-A8EU-01;TCGA-VR-A8EW-01;TCGA-VR-A8EY-01;TCGA-VR-AA4G-01;TCGA-Z6-A8JD-01;TCGA-Z6-A9VB-01	no_validation_or_external_data_used
outer	2	4		CNV_abs_burden	TCGA_Hallmark_CNV_abs_burden_C01v1	z_score	outer_training_samples_only	outer_validation_samples	74	18	TCGA-IG-A3I8-01;TCGA-IG-A3QL-01;TCGA-IG-A3YA-01;TCGA-IG-A3YB-01;TCGA-IG-A4P3-01;TCGA-IG-A4QT-01;TCGA-IG-A51D-01;TCGA-IG-A5B8-01;TCGA-IG-A5S3-01;TCGA-IG-A625-01;TCGA-IG-A6QS-01;TCGA-IG-A8O2-01;TCGA-IG-A97I-01;TCGA-JY-A6FA-01;TCGA-JY-A6FD-01;TCGA-JY-A6FE-01;TCGA-JY-A6FG-01;TCGA-JY-A93F-01;TCGA-KH-A6WC-01;TCGA-L5-A43H-01;TCGA-L5-A4OM-01;TCGA-L5-A88S-01;TCGA-L5-A88W-01;TCGA-L5-A88Z-01;TCGA-L5-A8NK-01…	TCGA-IG-A3Y9-01;TCGA-IG-A50L-01;TCGA-IG-A97H-01;TCGA-LN-A49U-01;TCGA-LN-A4A2-01;TCGA-LN-A4A3-01;TCGA-LN-A4A5-01;TCGA-LN-A4A9-01;TCGA-LN-A5U7-01;TCGA-LN-A7HZ-01;TCGA-V5-AASV-01;TCGA-VR-A8ER-01;TCGA-VR-A8EU-01;TCGA-VR-A8EW-01;TCGA-VR-A8EY-01;TCGA-VR-AA4G-01;TCGA-Z6-A8JD-01;TCGA-Z6-A9VB-01	no_validation_or_external_data_used
outer	2	4		METH_promoter_state	TCGA_Hallmark_METH_promoter_state_C01v1	z_score	outer_training_samples_only	outer_validation_samples	74	18	TCGA-IG-A3I8-01;TCGA-IG-A3QL-01;TCGA-IG-A3YA-01;TCGA-IG-A3YB-01;TCGA-IG-A4P3-01;TCGA-IG-A4QT-01;TCGA-IG-A51D-01;TCGA-IG-A5B8-01;TCGA-IG-A5S3-01;TCGA-IG-A625-01;TCGA-IG-A6QS-01;TCGA-IG-A8O2-01;TCGA-IG-A97I-01;TCGA-JY-A6FA-01;TCGA-JY-A6FD-01;TCGA-JY-A6FE-01;TCGA-JY-A6FG-01;TCGA-JY-A93F-01;TCGA-KH-A6WC-01;TCGA-L5-A43H-01;TCGA-L5-A4OM-01;TCGA-L5-A88S-01;TCGA-L5-A88W-01;TCGA-L5-A88Z-01;TCGA-L5-A8NK-01…	TCGA-IG-A3Y9-01;TCGA-IG-A50L-01;TCGA-IG-A97H-01;TCGA-LN-A49U-01;TCGA-LN-A4A2-01;TCGA-LN-A4A3-01;TCGA-LN-A4A5-01;TCGA-LN-A4A9-01;TCGA-LN-A5U7-01;TCGA-LN-A7HZ-01;TCGA-V5-AASV-01;TCGA-VR-A8ER-01;TCGA-VR-A8EU-01;TCGA-VR-A8EW-01;TCGA-VR-A8EY-01;TCGA-VR-AA4G-01;TCGA-Z6-A8JD-01;TCGA-Z6-A9VB-01	no_validation_or_external_data_used
outer	2	5		RNA_rank_activity	TCGA_Hallmark_RNA_rank_activity_C01v1	z_score	outer_training_samples_only	outer_validation_samples	74	18	TCGA-IG-A3I8-01;TCGA-IG-A3QL-01;TCGA-IG-A3Y9-01;TCGA-IG-A3YA-01;TCGA-IG-A3YB-01;TCGA-IG-A4P3-01;TCGA-IG-A4QT-01;TCGA-IG-A50L-01;TCGA-IG-A5B8-01;TCGA-IG-A625-01;TCGA-IG-A97H-01;TCGA-IG-A97I-01;TCGA-JY-A6FA-01;TCGA-JY-A6FD-01;TCGA-JY-A6FE-01;TCGA-JY-A6FG-01;TCGA-L5-A43H-01;TCGA-L5-A4OM-01;TCGA-L5-A88W-01;TCGA-L5-A88Z-01;TCGA-L5-A8NK-01;TCGA-L5-A8NQ-01;TCGA-L7-A56G-01;TCGA-LN-A49M-01;TCGA-LN-A49N-01…	TCGA-IG-A51D-01;TCGA-IG-A5S3-01;TCGA-IG-A6QS-01;TCGA-IG-A8O2-01;TCGA-JY-A93F-01;TCGA-KH-A6WC-01;TCGA-L5-A88S-01;TCGA-LN-A49K-01;TCGA-LN-A49L-01;TCGA-LN-A49O-01;TCGA-LN-A49P-01;TCGA-LN-A49R-01;TCGA-LN-A4A4-01;TCGA-LN-A4A6-01;TCGA-LN-A5U5-01;TCGA-LN-A8HZ-01;TCGA-VR-A8EP-01;TCGA-XP-A8T6-01	no_validation_or_external_data_used
outer	2	5		CNV_abs_burden	TCGA_Hallmark_CNV_abs_burden_C01v1	z_score	outer_training_samples_only	outer_validation_samples	74	18	TCGA-IG-A3I8-01;TCGA-IG-A3QL-01;TCGA-IG-A3Y9-01;TCGA-IG-A3YA-01;TCGA-IG-A3YB-01;TCGA-IG-A4P3-01;TCGA-IG-A4QT-01;TCGA-IG-A50L-01;TCGA-IG-A5B8-01;TCGA-IG-A625-01;TCGA-IG-A97H-01;TCGA-IG-A97I-01;TCGA-JY-A6FA-01;TCGA-JY-A6FD-01;TCGA-JY-A6FE-01;TCGA-JY-A6FG-01;TCGA-L5-A43H-01;TCGA-L5-A4OM-01;TCGA-L5-A88W-01;TCGA-L5-A88Z-01;TCGA-L5-A8NK-01;TCGA-L5-A8NQ-01;TCGA-L7-A56G-01;TCGA-LN-A49M-01;TCGA-LN-A49N-01…	TCGA-IG-A51D-01;TCGA-IG-A5S3-01;TCGA-IG-A6QS-01;TCGA-IG-A8O2-01;TCGA-JY-A93F-01;TCGA-KH-A6WC-01;TCGA-L5-A88S-01;TCGA-LN-A49K-01;TCGA-LN-A49L-01;TCGA-LN-A49O-01;TCGA-LN-A49P-01;TCGA-LN-A49R-01;TCGA-LN-A4A4-01;TCGA-LN-A4A6-01;TCGA-LN-A5U5-01;TCGA-LN-A8HZ-01;TCGA-VR-A8EP-01;TCGA-XP-A8T6-01	no_validation_or_external_data_used
outer	2	5		METH_promoter_state	TCGA_Hallmark_METH_promoter_state_C01v1	z_score	outer_training_samples_only	outer_validation_samples	74	18	TCGA-IG-A3I8-01;TCGA-IG-A3QL-01;TCGA-IG-A3Y9-01;TCGA-IG-A3YA-01;TCGA-IG-A3YB-01;TCGA-IG-A4P3-01;TCGA-IG-A4QT-01;TCGA-IG-A50L-01;TCGA-IG-A5B8-01;TCGA-IG-A625-01;TCGA-IG-A97H-01;TCGA-IG-A97I-01;TCGA-JY-A6FA-01;TCGA-JY-A6FD-01;TCGA-JY-A6FE-01;TCGA-JY-A6FG-01;TCGA-L5-A43H-01;TCGA-L5-A4OM-01;TCGA-L5-A88W-01;TCGA-L5-A88Z-01;TCGA-L5-A8NK-01;TCGA-L5-A8NQ-01;TCGA-L7-A56G-01;TCGA-LN-A49M-01;TCGA-LN-A49N-01…	TCGA-IG-A51D-01;TCGA-IG-A5S3-01;TCGA-IG-A6QS-01;TCGA-IG-A8O2-01;TCGA-JY-A93F-01;TCGA-KH-A6WC-01;TCGA-L5-A88S-01;TCGA-LN-A49K-01;TCGA-LN-A49L-01;TCGA-LN-A49O-01;TCGA-LN-A49P-01;TCGA-LN-A49R-01;TCGA-LN-A4A4-01;TCGA-LN-A4A6-01;TCGA-LN-A5U5-01;TCGA-LN-A8HZ-01;TCGA-VR-A8EP-01;TCGA-XP-A8T6-01	no_validation_or_external_data_used
outer	3	1		RNA_rank_activity	TCGA_Hallmark_RNA_rank_activity_C01v1	z_score	outer_training_samples_only	outer_validation_samples	72	20	TCGA-IG-A3QL-01;TCGA-IG-A3YA-01;TCGA-IG-A4P3-01;TCGA-IG-A4QT-01;TCGA-IG-A50L-01;TCGA-IG-A5B8-01;TCGA-IG-A8O2-01;TCGA-IG-A97H-01;TCGA-JY-A6FA-01;TCGA-JY-A6FD-01;TCGA-JY-A6FE-01;TCGA-JY-A93F-01;TCGA-KH-A6WC-01;TCGA-L5-A43H-01;TCGA-L5-A4OM-01;TCGA-L5-A88S-01;TCGA-L5-A88W-01;TCGA-L5-A88Z-01;TCGA-L5-A8NK-01;TCGA-L5-A8NQ-01;TCGA-L7-A56G-01;TCGA-LN-A49K-01;TCGA-LN-A49L-01;TCGA-LN-A49M-01;TCGA-LN-A49O-01…	TCGA-IG-A3I8-01;TCGA-IG-A3Y9-01;TCGA-IG-A3YB-01;TCGA-IG-A51D-01;TCGA-IG-A5S3-01;TCGA-IG-A625-01;TCGA-IG-A6QS-01;TCGA-IG-A97I-01;TCGA-JY-A6FG-01;TCGA-LN-A49N-01;TCGA-LN-A49S-01;TCGA-LN-A4A8-01;TCGA-LN-A4A9-01;TCGA-LN-A5U6-01;TCGA-LN-A5U7-01;TCGA-VR-A8EO-01;TCGA-VR-A8EP-01;TCGA-VR-A8ER-01;TCGA-VR-A8Q7-01;TCGA-VR-AA7D-01	no_validation_or_external_data_used
outer	3	1		CNV_abs_burden	TCGA_Hallmark_CNV_abs_burden_C01v1	z_score	outer_training_samples_only	outer_validation_samples	72	20	TCGA-IG-A3QL-01;TCGA-IG-A3YA-01;TCGA-IG-A4P3-01;TCGA-IG-A4QT-01;TCGA-IG-A50L-01;TCGA-IG-A5B8-01;TCGA-IG-A8O2-01;TCGA-IG-A97H-01;TCGA-JY-A6FA-01;TCGA-JY-A6FD-01;TCGA-JY-A6FE-01;TCGA-JY-A93F-01;TCGA-KH-A6WC-01;TCGA-L5-A43H-01;TCGA-L5-A4OM-01;TCGA-L5-A88S-01;TCGA-L5-A88W-01;TCGA-L5-A88Z-01;TCGA-L5-A8NK-01;TCGA-L5-A8NQ-01;TCGA-L7-A56G-01;TCGA-LN-A49K-01;TCGA-LN-A49L-01;TCGA-LN-A49M-01;TCGA-LN-A49O-01…	TCGA-IG-A3I8-01;TCGA-IG-A3Y9-01;TCGA-IG-A3YB-01;TCGA-IG-A51D-01;TCGA-IG-A5S3-01;TCGA-IG-A625-01;TCGA-IG-A6QS-01;TCGA-IG-A97I-01;TCGA-JY-A6FG-01;TCGA-LN-A49N-01;TCGA-LN-A49S-01;TCGA-LN-A4A8-01;TCGA-LN-A4A9-01;TCGA-LN-A5U6-01;TCGA-LN-A5U7-01;TCGA-VR-A8EO-01;TCGA-VR-A8EP-01;TCGA-VR-A8ER-01;TCGA-VR-A8Q7-01;TCGA-VR-AA7D-01	no_validation_or_external_data_used
outer	3	1		METH_promoter_state	TCGA_Hallmark_METH_promoter_state_C01v1	z_score	outer_training_samples_only	outer_validation_samples	72	20	TCGA-IG-A3QL-01;TCGA-IG-A3YA-01;TCGA-IG-A4P3-01;TCGA-IG-A4QT-01;TCGA-IG-A50L-01;TCGA-IG-A5B8-01;TCGA-IG-A8O2-01;TCGA-IG-A97H-01;TCGA-JY-A6FA-01;TCGA-JY-A6FD-01;TCGA-JY-A6FE-01;TCGA-JY-A93F-01;TCGA-KH-A6WC-01;TCGA-L5-A43H-01;TCGA-L5-A4OM-01;TCGA-L5-A88S-01;TCGA-L5-A88W-01;TCGA-L5-A88Z-01;TCGA-L5-A8NK-01;TCGA-L5-A8NQ-01;TCGA-L7-A56G-01;TCGA-LN-A49K-01;TCGA-LN-A49L-01;TCGA-LN-A49M-01;TCGA-LN-A49O-01…	TCGA-IG-A3I8-01;TCGA-IG-A3Y9-01;TCGA-IG-A3YB-01;TCGA-IG-A51D-01;TCGA-IG-A5S3-01;TCGA-IG-A625-01;TCGA-IG-A6QS-01;TCGA-IG-A97I-01;TCGA-JY-A6FG-01;TCGA-LN-A49N-01;TCGA-LN-A49S-01;TCGA-LN-A4A8-01;TCGA-LN-A4A9-01;TCGA-LN-A5U6-01;TCGA-LN-A5U7-01;TCGA-VR-A8EO-01;TCGA-VR-A8EP-01;TCGA-VR-A8ER-01;TCGA-VR-A8Q7-01;TCGA-VR-AA7D-01	no_validation_or_external_data_used
outer	3	2		RNA_rank_activity	TCGA_Hallmark_RNA_rank_activity_C01v1	z_score	outer_training_samples_only	outer_validation_samples	74	18	TCGA-IG-A3I8-01;TCGA-IG-A3QL-01;TCGA-IG-A3Y9-01;TCGA-IG-A3YB-01;TCGA-IG-A4P3-01;TCGA-IG-A50L-01;TCGA-IG-A51D-01;TCGA-IG-A5B8-01;TCGA-IG-A5S3-01;TCGA-IG-A625-01;TCGA-IG-A6QS-01;TCGA-IG-A8O2-01;TCGA-IG-A97H-01;TCGA-IG-A97I-01;TCGA-JY-A6FE-01;TCGA-JY-A6FG-01;TCGA-JY-A93F-01;TCGA-KH-A6WC-01;TCGA-L5-A43H-01;TCGA-L5-A4OM-01;TCGA-L5-A88S-01;TCGA-L5-A88W-01;TCGA-L5-A88Z-01;TCGA-L5-A8NK-01;TCGA-L7-A56G-01…	TCGA-IG-A3YA-01;TCGA-IG-A4QT-01;TCGA-JY-A6FA-01;TCGA-JY-A6FD-01;TCGA-L5-A8NQ-01;TCGA-LN-A49K-01;TCGA-LN-A49M-01;TCGA-LN-A49P-01;TCGA-LN-A49V-01;TCGA-LN-A4A2-01;TCGA-LN-A4MR-01;TCGA-LN-A7HY-01;TCGA-LN-A8HZ-01;TCGA-LN-A8I0-01;TCGA-LN-A9FP-01;TCGA-Q9-A6FU-01;TCGA-VR-A8EW-01;TCGA-Z6-A8JE-01	no_validation_or_external_data_used
outer	3	2		CNV_abs_burden	TCGA_Hallmark_CNV_abs_burden_C01v1	z_score	outer_training_samples_only	outer_validation_samples	74	18	TCGA-IG-A3I8-01;TCGA-IG-A3QL-01;TCGA-IG-A3Y9-01;TCGA-IG-A3YB-01;TCGA-IG-A4P3-01;TCGA-IG-A50L-01;TCGA-IG-A51D-01;TCGA-IG-A5B8-01;TCGA-IG-A5S3-01;TCGA-IG-A625-01;TCGA-IG-A6QS-01;TCGA-IG-A8O2-01;TCGA-IG-A97H-01;TCGA-IG-A97I-01;TCGA-JY-A6FE-01;TCGA-JY-A6FG-01;TCGA-JY-A93F-01;TCGA-KH-A6WC-01;TCGA-L5-A43H-01;TCGA-L5-A4OM-01;TCGA-L5-A88S-01;TCGA-L5-A88W-01;TCGA-L5-A88Z-01;TCGA-L5-A8NK-01;TCGA-L7-A56G-01…	TCGA-IG-A3YA-01;TCGA-IG-A4QT-01;TCGA-JY-A6FA-01;TCGA-JY-A6FD-01;TCGA-L5-A8NQ-01;TCGA-LN-A49K-01;TCGA-LN-A49M-01;TCGA-LN-A49P-01;TCGA-LN-A49V-01;TCGA-LN-A4A2-01;TCGA-LN-A4MR-01;TCGA-LN-A7HY-01;TCGA-LN-A8HZ-01;TCGA-LN-A8I0-01;TCGA-LN-A9FP-01;TCGA-Q9-A6FU-01;TCGA-VR-A8EW-01;TCGA-Z6-A8JE-01	no_validation_or_external_data_used
outer	3	2		METH_promoter_state	TCGA_Hallmark_METH_promoter_state_C01v1	z_score	outer_training_samples_only	outer_validation_samples	74	18	TCGA-IG-A3I8-01;TCGA-IG-A3QL-01;TCGA-IG-A3Y9-01;TCGA-IG-A3YB-01;TCGA-IG-A4P3-01;TCGA-IG-A50L-01;TCGA-IG-A51D-01;TCGA-IG-A5B8-01;TCGA-IG-A5S3-01;TCGA-IG-A625-01;TCGA-IG-A6QS-01;TCGA-IG-A8O2-01;TCGA-IG-A97H-01;TCGA-IG-A97I-01;TCGA-JY-A6FE-01;TCGA-JY-A6FG-01;TCGA-JY-A93F-01;TCGA-KH-A6WC-01;TCGA-L5-A43H-01;TCGA-L5-A4OM-01;TCGA-L5-A88S-01;TCGA-L5-A88W-01;TCGA-L5-A88Z-01;TCGA-L5-A8NK-01;TCGA-L7-A56G-01…	TCGA-IG-A3YA-01;TCGA-IG-A4QT-01;TCGA-JY-A6FA-01;TCGA-JY-A6FD-01;TCGA-L5-A8NQ-01;TCGA-LN-A49K-01;TCGA-LN-A49M-01;TCGA-LN-A49P-01;TCGA-LN-A49V-01;TCGA-LN-A4A2-01;TCGA-LN-A4MR-01;TCGA-LN-A7HY-01;TCGA-LN-A8HZ-01;TCGA-LN-A8I0-01;TCGA-LN-A9FP-01;TCGA-Q9-A6FU-01;TCGA-VR-A8EW-01;TCGA-Z6-A8JE-01	no_validation_or_external_data_used
outer	3	3		RNA_rank_activity	TCGA_Hallmark_RNA_rank_activity_C01v1	z_score	outer_training_samples_only	outer_validation_samples	74	18	TCGA-IG-A3I8-01;TCGA-IG-A3QL-01;TCGA-IG-A3Y9-01;TCGA-IG-A3YA-01;TCGA-IG-A3YB-01;TCGA-IG-A4P3-01;TCGA-IG-A4QT-01;TCGA-IG-A50L-01;TCGA-IG-A51D-01;TCGA-IG-A5B8-01;TCGA-IG-A5S3-01;TCGA-IG-A625-01;TCGA-IG-A6QS-01;TCGA-IG-A8O2-01;TCGA-IG-A97H-01;TCGA-IG-A97I-01;TCGA-JY-A6FA-01;TCGA-JY-A6FD-01;TCGA-JY-A6FG-01;TCGA-JY-A93F-01;TCGA-KH-A6WC-01;TCGA-L5-A43H-01;TCGA-L5-A4OM-01;TCGA-L5-A88W-01;TCGA-L5-A88Z-01…	TCGA-JY-A6FE-01;TCGA-L5-A88S-01;TCGA-LN-A49R-01;TCGA-LN-A49X-01;TCGA-LN-A4A3-01;TCGA-LN-A4A4-01;TCGA-LN-A7HV-01;TCGA-LN-A9FQ-01;TCGA-LN-A9FR-01;TCGA-V5-A7RC-01;TCGA-VR-A8EU-01;TCGA-VR-A8EX-01;TCGA-VR-A8EY-01;TCGA-VR-AA4G-01;TCGA-VR-AA7B-01;TCGA-VR-AA7I-01;TCGA-XP-A8T6-01;TCGA-Z6-AAPN-01	no_validation_or_external_data_used
outer	3	3		CNV_abs_burden	TCGA_Hallmark_CNV_abs_burden_C01v1	z_score	outer_training_samples_only	outer_validation_samples	74	18	TCGA-IG-A3I8-01;TCGA-IG-A3QL-01;TCGA-IG-A3Y9-01;TCGA-IG-A3YA-01;TCGA-IG-A3YB-01;TCGA-IG-A4P3-01;TCGA-IG-A4QT-01;TCGA-IG-A50L-01;TCGA-IG-A51D-01;TCGA-IG-A5B8-01;TCGA-IG-A5S3-01;TCGA-IG-A625-01;TCGA-IG-A6QS-01;TCGA-IG-A8O2-01;TCGA-IG-A97H-01;TCGA-IG-A97I-01;TCGA-JY-A6FA-01;TCGA-JY-A6FD-01;TCGA-JY-A6FG-01;TCGA-JY-A93F-01;TCGA-KH-A6WC-01;TCGA-L5-A43H-01;TCGA-L5-A4OM-01;TCGA-L5-A88W-01;TCGA-L5-A88Z-01…	TCGA-JY-A6FE-01;TCGA-L5-A88S-01;TCGA-LN-A49R-01;TCGA-LN-A49X-01;TCGA-LN-A4A3-01;TCGA-LN-A4A4-01;TCGA-LN-A7HV-01;TCGA-LN-A9FQ-01;TCGA-LN-A9FR-01;TCGA-V5-A7RC-01;TCGA-VR-A8EU-01;TCGA-VR-A8EX-01;TCGA-VR-A8EY-01;TCGA-VR-AA4G-01;TCGA-VR-AA7B-01;TCGA-VR-AA7I-01;TCGA-XP-A8T6-01;TCGA-Z6-AAPN-01	no_validation_or_external_data_used
outer	3	3		METH_promoter_state	TCGA_Hallmark_METH_promoter_state_C01v1	z_score	outer_training_samples_only	outer_validation_samples	74	18	TCGA-IG-A3I8-01;TCGA-IG-A3QL-01;TCGA-IG-A3Y9-01;TCGA-IG-A3YA-01;TCGA-IG-A3YB-01;TCGA-IG-A4P3-01;TCGA-IG-A4QT-01;TCGA-IG-A50L-01;TCGA-IG-A51D-01;TCGA-IG-A5B8-01;TCGA-IG-A5S3-01;TCGA-IG-A625-01;TCGA-IG-A6QS-01;TCGA-IG-A8O2-01;TCGA-IG-A97H-01;TCGA-IG-A97I-01;TCGA-JY-A6FA-01;TCGA-JY-A6FD-01;TCGA-JY-A6FG-01;TCGA-JY-A93F-01;TCGA-KH-A6WC-01;TCGA-L5-A43H-01;TCGA-L5-A4OM-01;TCGA-L5-A88W-01;TCGA-L5-A88Z-01…	TCGA-JY-A6FE-01;TCGA-L5-A88S-01;TCGA-LN-A49R-01;TCGA-LN-A49X-01;TCGA-LN-A4A3-01;TCGA-LN-A4A4-01;TCGA-LN-A7HV-01;TCGA-LN-A9FQ-01;TCGA-LN-A9FR-01;TCGA-V5-A7RC-01;TCGA-VR-A8EU-01;TCGA-VR-A8EX-01;TCGA-VR-A8EY-01;TCGA-VR-AA4G-01;TCGA-VR-AA7B-01;TCGA-VR-AA7I-01;TCGA-XP-A8T6-01;TCGA-Z6-AAPN-01	no_validation_or_external_data_used
outer	3	4		RNA_rank_activity	TCGA_Hallmark_RNA_rank_activity_C01v1	z_score	outer_training_samples_only	outer_validation_samples	74	18	TCGA-IG-A3I8-01;TCGA-IG-A3Y9-01;TCGA-IG-A3YA-01;TCGA-IG-A3YB-01;TCGA-IG-A4QT-01;TCGA-IG-A50L-01;TCGA-IG-A51D-01;TCGA-IG-A5B8-01;TCGA-IG-A5S3-01;TCGA-IG-A625-01;TCGA-IG-A6QS-01;TCGA-IG-A97H-01;TCGA-IG-A97I-01;TCGA-JY-A6FA-01;TCGA-JY-A6FD-01;TCGA-JY-A6FE-01;TCGA-JY-A6FG-01;TCGA-L5-A4OM-01;TCGA-L5-A88S-01;TCGA-L5-A88W-01;TCGA-L5-A8NK-01;TCGA-L5-A8NQ-01;TCGA-L7-A56G-01;TCGA-LN-A49K-01;TCGA-LN-A49M-01…	TCGA-IG-A3QL-01;TCGA-IG-A4P3-01;TCGA-IG-A8O2-01;TCGA-JY-A93F-01;TCGA-KH-A6WC-01;TCGA-L5-A43H-01;TCGA-L5-A88Z-01;TCGA-LN-A49L-01;TCGA-LN-A49O-01;TCGA-LN-A49U-01;TCGA-LN-A49W-01;TCGA-LN-A4A6-01;TCGA-LN-A8I1-01;TCGA-LN-A9FO-01;TCGA-S8-A6BW-01;TCGA-VR-A8ET-01;TCGA-VR-A8EZ-01;TCGA-XP-A8T8-01	no_validation_or_external_data_used
outer	3	4		CNV_abs_burden	TCGA_Hallmark_CNV_abs_burden_C01v1	z_score	outer_training_samples_only	outer_validation_samples	74	18	TCGA-IG-A3I8-01;TCGA-IG-A3Y9-01;TCGA-IG-A3YA-01;TCGA-IG-A3YB-01;TCGA-IG-A4QT-01;TCGA-IG-A50L-01;TCGA-IG-A51D-01;TCGA-IG-A5B8-01;TCGA-IG-A5S3-01;TCGA-IG-A625-01;TCGA-IG-A6QS-01;TCGA-IG-A97H-01;TCGA-IG-A97I-01;TCGA-JY-A6FA-01;TCGA-JY-A6FD-01;TCGA-JY-A6FE-01;TCGA-JY-A6FG-01;TCGA-L5-A4OM-01;TCGA-L5-A88S-01;TCGA-L5-A88W-01;TCGA-L5-A8NK-01;TCGA-L5-A8NQ-01;TCGA-L7-A56G-01;TCGA-LN-A49K-01;TCGA-LN-A49M-01…	TCGA-IG-A3QL-01;TCGA-IG-A4P3-01;TCGA-IG-A8O2-01;TCGA-JY-A93F-01;TCGA-KH-A6WC-01;TCGA-L5-A43H-01;TCGA-L5-A88Z-01;TCGA-LN-A49L-01;TCGA-LN-A49O-01;TCGA-LN-A49U-01;TCGA-LN-A49W-01;TCGA-LN-A4A6-01;TCGA-LN-A8I1-01;TCGA-LN-A9FO-01;TCGA-S8-A6BW-01;TCGA-VR-A8ET-01;TCGA-VR-A8EZ-01;TCGA-XP-A8T8-01	no_validation_or_external_data_used
outer	3	4		METH_promoter_state	TCGA_Hallmark_METH_promoter_state_C01v1	z_score	outer_training_samples_only	outer_validation_samples	74	18	TCGA-IG-A3I8-01;TCGA-IG-A3Y9-01;TCGA-IG-A3YA-01;TCGA-IG-A3YB-01;TCGA-IG-A4QT-01;TCGA-IG-A50L-01;TCGA-IG-A51D-01;TCGA-IG-A5B8-01;TCGA-IG-A5S3-01;TCGA-IG-A625-01;TCGA-IG-A6QS-01;TCGA-IG-A97H-01;TCGA-IG-A97I-01;TCGA-JY-A6FA-01;TCGA-JY-A6FD-01;TCGA-JY-A6FE-01;TCGA-JY-A6FG-01;TCGA-L5-A4OM-01;TCGA-L5-A88S-01;TCGA-L5-A88W-01;TCGA-L5-A8NK-01;TCGA-L5-A8NQ-01;TCGA-L7-A56G-01;TCGA-LN-A49K-01;TCGA-LN-A49M-01…	TCGA-IG-A3QL-01;TCGA-IG-A4P3-01;TCGA-IG-A8O2-01;TCGA-JY-A93F-01;TCGA-KH-A6WC-01;TCGA-L5-A43H-01;TCGA-L5-A88Z-01;TCGA-LN-A49L-01;TCGA-LN-A49O-01;TCGA-LN-A49U-01;TCGA-LN-A49W-01;TCGA-LN-A4A6-01;TCGA-LN-A8I1-01;TCGA-LN-A9FO-01;TCGA-S8-A6BW-01;TCGA-VR-A8ET-01;TCGA-VR-A8EZ-01;TCGA-XP-A8T8-01	no_validation_or_external_data_used
outer	3	5		RNA_rank_activity	TCGA_Hallmark_RNA_rank_activity_C01v1	z_score	outer_training_samples_only	outer_validation_samples	74	18	TCGA-IG-A3I8-01;TCGA-IG-A3QL-01;TCGA-IG-A3Y9-01;TCGA-IG-A3YA-01;TCGA-IG-A3YB-01;TCGA-IG-A4P3-01;TCGA-IG-A4QT-01;TCGA-IG-A51D-01;TCGA-IG-A5S3-01;TCGA-IG-A625-01;TCGA-IG-A6QS-01;TCGA-IG-A8O2-01;TCGA-IG-A97I-01;TCGA-JY-A6FA-01;TCGA-JY-A6FD-01;TCGA-JY-A6FE-01;TCGA-JY-A6FG-01;TCGA-JY-A93F-01;TCGA-KH-A6WC-01;TCGA-L5-A43H-01;TCGA-L5-A88S-01;TCGA-L5-A88Z-01;TCGA-L5-A8NQ-01;TCGA-LN-A49K-01;TCGA-LN-A49L-01…	TCGA-IG-A50L-01;TCGA-IG-A5B8-01;TCGA-IG-A97H-01;TCGA-L5-A4OM-01;TCGA-L5-A88W-01;TCGA-L5-A8NK-01;TCGA-L7-A56G-01;TCGA-LN-A49Y-01;TCGA-LN-A4A1-01;TCGA-LN-A4A5-01;TCGA-LN-A4MQ-01;TCGA-LN-A5U5-01;TCGA-LN-A7HW-01;TCGA-LN-A7HX-01;TCGA-LN-A7HZ-01;TCGA-V5-AASV-01;TCGA-Z6-A8JD-01;TCGA-Z6-A9VB-01	no_validation_or_external_data_used
outer	3	5		CNV_abs_burden	TCGA_Hallmark_CNV_abs_burden_C01v1	z_score	outer_training_samples_only	outer_validation_samples	74	18	TCGA-IG-A3I8-01;TCGA-IG-A3QL-01;TCGA-IG-A3Y9-01;TCGA-IG-A3YA-01;TCGA-IG-A3YB-01;TCGA-IG-A4P3-01;TCGA-IG-A4QT-01;TCGA-IG-A51D-01;TCGA-IG-A5S3-01;TCGA-IG-A625-01;TCGA-IG-A6QS-01;TCGA-IG-A8O2-01;TCGA-IG-A97I-01;TCGA-JY-A6FA-01;TCGA-JY-A6FD-01;TCGA-JY-A6FE-01;TCGA-JY-A6FG-01;TCGA-JY-A93F-01;TCGA-KH-A6WC-01;TCGA-L5-A43H-01;TCGA-L5-A88S-01;TCGA-L5-A88Z-01;TCGA-L5-A8NQ-01;TCGA-LN-A49K-01;TCGA-LN-A49L-01…	TCGA-IG-A50L-01;TCGA-IG-A5B8-01;TCGA-IG-A97H-01;TCGA-L5-A4OM-01;TCGA-L5-A88W-01;TCGA-L5-A8NK-01;TCGA-L7-A56G-01;TCGA-LN-A49Y-01;TCGA-LN-A4A1-01;TCGA-LN-A4A5-01;TCGA-LN-A4MQ-01;TCGA-LN-A5U5-01;TCGA-LN-A7HW-01;TCGA-LN-A7HX-01;TCGA-LN-A7HZ-01;TCGA-V5-AASV-01;TCGA-Z6-A8JD-01;TCGA-Z6-A9VB-01	no_validation_or_external_data_used
outer	3	5		METH_promoter_state	TCGA_Hallmark_METH_promoter_state_C01v1	z_score	outer_training_samples_only	outer_validation_samples	74	18	TCGA-IG-A3I8-01;TCGA-IG-A3QL-01;TCGA-IG-A3Y9-01;TCGA-IG-A3YA-01;TCGA-IG-A3YB-01;TCGA-IG-A4P3-01;TCGA-IG-A4QT-01;TCGA-IG-A51D-01;TCGA-IG-A5S3-01;TCGA-IG-A625-01;TCGA-IG-A6QS-01;TCGA-IG-A8O2-01;TCGA-IG-A97I-01;TCGA-JY-A6FA-01;TCGA-JY-A6FD-01;TCGA-JY-A6FE-01;TCGA-JY-A6FG-01;TCGA-JY-A93F-01;TCGA-KH-A6WC-01;TCGA-L5-A43H-01;TCGA-L5-A88S-01;TCGA-L5-A88Z-01;TCGA-L5-A8NQ-01;TCGA-LN-A49K-01;TCGA-LN-A49L-01…	TCGA-IG-A50L-01;TCGA-IG-A5B8-01;TCGA-IG-A97H-01;TCGA-L5-A4OM-01;TCGA-L5-A88W-01;TCGA-L5-A8NK-01;TCGA-L7-A56G-01;TCGA-LN-A49Y-01;TCGA-LN-A4A1-01;TCGA-LN-A4A5-01;TCGA-LN-A4MQ-01;TCGA-LN-A5U5-01;TCGA-LN-A7HW-01;TCGA-LN-A7HX-01;TCGA-LN-A7HZ-01;TCGA-V5-AASV-01;TCGA-Z6-A8JD-01;TCGA-Z6-A9VB-01	no_validation_or_external_data_used
outer	4	1		RNA_rank_activity	TCGA_Hallmark_RNA_rank_activity_C01v1	z_score	outer_training_samples_only	outer_validation_samples	72	20	TCGA-IG-A3QL-01;TCGA-IG-A3Y9-01;TCGA-IG-A3YB-01;TCGA-IG-A4P3-01;TCGA-IG-A4QT-01;TCGA-IG-A50L-01;TCGA-IG-A51D-01;TCGA-IG-A5S3-01;TCGA-IG-A6QS-01;TCGA-IG-A8O2-01;TCGA-IG-A97H-01;TCGA-IG-A97I-01;TCGA-JY-A6FA-01;TCGA-JY-A6FD-01;TCGA-JY-A6FG-01;TCGA-JY-A93F-01;TCGA-L5-A43H-01;TCGA-L5-A4OM-01;TCGA-L5-A88S-01;TCGA-L5-A88W-01;TCGA-L5-A88Z-01;TCGA-L5-A8NQ-01;TCGA-LN-A49K-01;TCGA-LN-A49L-01;TCGA-LN-A49M-01…	TCGA-IG-A3I8-01;TCGA-IG-A3YA-01;TCGA-IG-A5B8-01;TCGA-IG-A625-01;TCGA-JY-A6FE-01;TCGA-KH-A6WC-01;TCGA-L5-A8NK-01;TCGA-L7-A56G-01;TCGA-LN-A49W-01;TCGA-LN-A4A2-01;TCGA-LN-A4A4-01;TCGA-LN-A4A9-01;TCGA-LN-A7HW-01;TCGA-LN-A7HX-01;TCGA-LN-A7HZ-01;TCGA-V5-AASV-01;TCGA-VR-A8EP-01;TCGA-VR-AA7D-01;TCGA-VR-AA7I-01;TCGA-XP-A8T8-01	no_validation_or_external_data_used
outer	4	1		CNV_abs_burden	TCGA_Hallmark_CNV_abs_burden_C01v1	z_score	outer_training_samples_only	outer_validation_samples	72	20	TCGA-IG-A3QL-01;TCGA-IG-A3Y9-01;TCGA-IG-A3YB-01;TCGA-IG-A4P3-01;TCGA-IG-A4QT-01;TCGA-IG-A50L-01;TCGA-IG-A51D-01;TCGA-IG-A5S3-01;TCGA-IG-A6QS-01;TCGA-IG-A8O2-01;TCGA-IG-A97H-01;TCGA-IG-A97I-01;TCGA-JY-A6FA-01;TCGA-JY-A6FD-01;TCGA-JY-A6FG-01;TCGA-JY-A93F-01;TCGA-L5-A43H-01;TCGA-L5-A4OM-01;TCGA-L5-A88S-01;TCGA-L5-A88W-01;TCGA-L5-A88Z-01;TCGA-L5-A8NQ-01;TCGA-LN-A49K-01;TCGA-LN-A49L-01;TCGA-LN-A49M-01…	TCGA-IG-A3I8-01;TCGA-IG-A3YA-01;TCGA-IG-A5B8-01;TCGA-IG-A625-01;TCGA-JY-A6FE-01;TCGA-KH-A6WC-01;TCGA-L5-A8NK-01;TCGA-L7-A56G-01;TCGA-LN-A49W-01;TCGA-LN-A4A2-01;TCGA-LN-A4A4-01;TCGA-LN-A4A9-01;TCGA-LN-A7HW-01;TCGA-LN-A7HX-01;TCGA-LN-A7HZ-01;TCGA-V5-AASV-01;TCGA-VR-A8EP-01;TCGA-VR-AA7D-01;TCGA-VR-AA7I-01;TCGA-XP-A8T8-01	no_validation_or_external_data_used
outer	4	1		METH_promoter_state	TCGA_Hallmark_METH_promoter_state_C01v1	z_score	outer_training_samples_only	outer_validation_samples	72	20	TCGA-IG-A3QL-01;TCGA-IG-A3Y9-01;TCGA-IG-A3YB-01;TCGA-IG-A4P3-01;TCGA-IG-A4QT-01;TCGA-IG-A50L-01;TCGA-IG-A51D-01;TCGA-IG-A5S3-01;TCGA-IG-A6QS-01;TCGA-IG-A8O2-01;TCGA-IG-A97H-01;TCGA-IG-A97I-01;TCGA-JY-A6FA-01;TCGA-JY-A6FD-01;TCGA-JY-A6FG-01;TCGA-JY-A93F-01;TCGA-L5-A43H-01;TCGA-L5-A4OM-01;TCGA-L5-A88S-01;TCGA-L5-A88W-01;TCGA-L5-A88Z-01;TCGA-L5-A8NQ-01;TCGA-LN-A49K-01;TCGA-LN-A49L-01;TCGA-LN-A49M-01…	TCGA-IG-A3I8-01;TCGA-IG-A3YA-01;TCGA-IG-A5B8-01;TCGA-IG-A625-01;TCGA-JY-A6FE-01;TCGA-KH-A6WC-01;TCGA-L5-A8NK-01;TCGA-L7-A56G-01;TCGA-LN-A49W-01;TCGA-LN-A4A2-01;TCGA-LN-A4A4-01;TCGA-LN-A4A9-01;TCGA-LN-A7HW-01;TCGA-LN-A7HX-01;TCGA-LN-A7HZ-01;TCGA-V5-AASV-01;TCGA-VR-A8EP-01;TCGA-VR-AA7D-01;TCGA-VR-AA7I-01;TCGA-XP-A8T8-01	no_validation_or_external_data_used
outer	4	2		RNA_rank_activity	TCGA_Hallmark_RNA_rank_activity_C01v1	z_score	outer_training_samples_only	outer_validation_samples	74	18	TCGA-IG-A3I8-01;TCGA-IG-A3QL-01;TCGA-IG-A3Y9-01;TCGA-IG-A3YA-01;TCGA-IG-A3YB-01;TCGA-IG-A4P3-01;TCGA-IG-A4QT-01;TCGA-IG-A51D-01;TCGA-IG-A5B8-01;TCGA-IG-A5S3-01;TCGA-IG-A625-01;TCGA-IG-A6QS-01;TCGA-IG-A97I-01;TCGA-JY-A6FA-01;TCGA-JY-A6FD-01;TCGA-JY-A6FE-01;TCGA-KH-A6WC-01;TCGA-L5-A88S-01;TCGA-L5-A8NK-01;TCGA-L5-A8NQ-01;TCGA-L7-A56G-01;TCGA-LN-A49K-01;TCGA-LN-A49L-01;TCGA-LN-A49M-01;TCGA-LN-A49P-01…	TCGA-IG-A50L-01;TCGA-IG-A8O2-01;TCGA-IG-A97H-01;TCGA-JY-A6FG-01;TCGA-JY-A93F-01;TCGA-L5-A43H-01;TCGA-L5-A4OM-01;TCGA-L5-A88W-01;TCGA-L5-A88Z-01;TCGA-LN-A49N-01;TCGA-LN-A49O-01;TCGA-LN-A49R-01;TCGA-LN-A4A6-01;TCGA-LN-A4MQ-01;TCGA-VR-A8ET-01;TCGA-VR-A8EY-01;TCGA-VR-AA4G-01;TCGA-Z6-A8JD-01	no_validation_or_external_data_used
outer	4	2		CNV_abs_burden	TCGA_Hallmark_CNV_abs_burden_C01v1	z_score	outer_training_samples_only	outer_validation_samples	74	18	TCGA-IG-A3I8-01;TCGA-IG-A3QL-01;TCGA-IG-A3Y9-01;TCGA-IG-A3YA-01;TCGA-IG-A3YB-01;TCGA-IG-A4P3-01;TCGA-IG-A4QT-01;TCGA-IG-A51D-01;TCGA-IG-A5B8-01;TCGA-IG-A5S3-01;TCGA-IG-A625-01;TCGA-IG-A6QS-01;TCGA-IG-A97I-01;TCGA-JY-A6FA-01;TCGA-JY-A6FD-01;TCGA-JY-A6FE-01;TCGA-KH-A6WC-01;TCGA-L5-A88S-01;TCGA-L5-A8NK-01;TCGA-L5-A8NQ-01;TCGA-L7-A56G-01;TCGA-LN-A49K-01;TCGA-LN-A49L-01;TCGA-LN-A49M-01;TCGA-LN-A49P-01…	TCGA-IG-A50L-01;TCGA-IG-A8O2-01;TCGA-IG-A97H-01;TCGA-JY-A6FG-01;TCGA-JY-A93F-01;TCGA-L5-A43H-01;TCGA-L5-A4OM-01;TCGA-L5-A88W-01;TCGA-L5-A88Z-01;TCGA-LN-A49N-01;TCGA-LN-A49O-01;TCGA-LN-A49R-01;TCGA-LN-A4A6-01;TCGA-LN-A4MQ-01;TCGA-VR-A8ET-01;TCGA-VR-A8EY-01;TCGA-VR-AA4G-01;TCGA-Z6-A8JD-01	no_validation_or_external_data_used
outer	4	2		METH_promoter_state	TCGA_Hallmark_METH_promoter_state_C01v1	z_score	outer_training_samples_only	outer_validation_samples	74	18	TCGA-IG-A3I8-01;TCGA-IG-A3QL-01;TCGA-IG-A3Y9-01;TCGA-IG-A3YA-01;TCGA-IG-A3YB-01;TCGA-IG-A4P3-01;TCGA-IG-A4QT-01;TCGA-IG-A51D-01;TCGA-IG-A5B8-01;TCGA-IG-A5S3-01;TCGA-IG-A625-01;TCGA-IG-A6QS-01;TCGA-IG-A97I-01;TCGA-JY-A6FA-01;TCGA-JY-A6FD-01;TCGA-JY-A6FE-01;TCGA-KH-A6WC-01;TCGA-L5-A88S-01;TCGA-L5-A8NK-01;TCGA-L5-A8NQ-01;TCGA-L7-A56G-01;TCGA-LN-A49K-01;TCGA-LN-A49L-01;TCGA-LN-A49M-01;TCGA-LN-A49P-01…	TCGA-IG-A50L-01;TCGA-IG-A8O2-01;TCGA-IG-A97H-01;TCGA-JY-A6FG-01;TCGA-JY-A93F-01;TCGA-L5-A43H-01;TCGA-L5-A4OM-01;TCGA-L5-A88W-01;TCGA-L5-A88Z-01;TCGA-LN-A49N-01;TCGA-LN-A49O-01;TCGA-LN-A49R-01;TCGA-LN-A4A6-01;TCGA-LN-A4MQ-01;TCGA-VR-A8ET-01;TCGA-VR-A8EY-01;TCGA-VR-AA4G-01;TCGA-Z6-A8JD-01	no_validation_or_external_data_used
outer	4	3		RNA_rank_activity	TCGA_Hallmark_RNA_rank_activity_C01v1	z_score	outer_training_samples_only	outer_validation_samples	74	18	TCGA-IG-A3I8-01;TCGA-IG-A3QL-01;TCGA-IG-A3Y9-01;TCGA-IG-A3YA-01;TCGA-IG-A3YB-01;TCGA-IG-A4P3-01;TCGA-IG-A4QT-01;TCGA-IG-A50L-01;TCGA-IG-A5B8-01;TCGA-IG-A5S3-01;TCGA-IG-A625-01;TCGA-IG-A8O2-01;TCGA-IG-A97H-01;TCGA-IG-A97I-01;TCGA-JY-A6FD-01;TCGA-JY-A6FE-01;TCGA-JY-A6FG-01;TCGA-JY-A93F-01;TCGA-KH-A6WC-01;TCGA-L5-A43H-01;TCGA-L5-A4OM-01;TCGA-L5-A88S-01;TCGA-L5-A88W-01;TCGA-L5-A88Z-01;TCGA-L5-A8NK-01…	TCGA-IG-A51D-01;TCGA-IG-A6QS-01;TCGA-JY-A6FA-01;TCGA-LN-A49K-01;TCGA-LN-A49L-01;TCGA-LN-A49S-01;TCGA-LN-A49V-01;TCGA-LN-A49X-01;TCGA-LN-A4A1-01;TCGA-LN-A4A3-01;TCGA-LN-A5U5-01;TCGA-LN-A5U6-01;TCGA-LN-A7HY-01;TCGA-LN-A9FR-01;TCGA-S8-A6BW-01;TCGA-VR-A8EO-01;TCGA-VR-A8ER-01;TCGA-VR-AA7B-01	no_validation_or_external_data_used
outer	4	3		CNV_abs_burden	TCGA_Hallmark_CNV_abs_burden_C01v1	z_score	outer_training_samples_only	outer_validation_samples	74	18	TCGA-IG-A3I8-01;TCGA-IG-A3QL-01;TCGA-IG-A3Y9-01;TCGA-IG-A3YA-01;TCGA-IG-A3YB-01;TCGA-IG-A4P3-01;TCGA-IG-A4QT-01;TCGA-IG-A50L-01;TCGA-IG-A5B8-01;TCGA-IG-A5S3-01;TCGA-IG-A625-01;TCGA-IG-A8O2-01;TCGA-IG-A97H-01;TCGA-IG-A97I-01;TCGA-JY-A6FD-01;TCGA-JY-A6FE-01;TCGA-JY-A6FG-01;TCGA-JY-A93F-01;TCGA-KH-A6WC-01;TCGA-L5-A43H-01;TCGA-L5-A4OM-01;TCGA-L5-A88S-01;TCGA-L5-A88W-01;TCGA-L5-A88Z-01;TCGA-L5-A8NK-01…	TCGA-IG-A51D-01;TCGA-IG-A6QS-01;TCGA-JY-A6FA-01;TCGA-LN-A49K-01;TCGA-LN-A49L-01;TCGA-LN-A49S-01;TCGA-LN-A49V-01;TCGA-LN-A49X-01;TCGA-LN-A4A1-01;TCGA-LN-A4A3-01;TCGA-LN-A5U5-01;TCGA-LN-A5U6-01;TCGA-LN-A7HY-01;TCGA-LN-A9FR-01;TCGA-S8-A6BW-01;TCGA-VR-A8EO-01;TCGA-VR-A8ER-01;TCGA-VR-AA7B-01	no_validation_or_external_data_used
outer	4	3		METH_promoter_state	TCGA_Hallmark_METH_promoter_state_C01v1	z_score	outer_training_samples_only	outer_validation_samples	74	18	TCGA-IG-A3I8-01;TCGA-IG-A3QL-01;TCGA-IG-A3Y9-01;TCGA-IG-A3YA-01;TCGA-IG-A3YB-01;TCGA-IG-A4P3-01;TCGA-IG-A4QT-01;TCGA-IG-A50L-01;TCGA-IG-A5B8-01;TCGA-IG-A5S3-01;TCGA-IG-A625-01;TCGA-IG-A8O2-01;TCGA-IG-A97H-01;TCGA-IG-A97I-01;TCGA-JY-A6FD-01;TCGA-JY-A6FE-01;TCGA-JY-A6FG-01;TCGA-JY-A93F-01;TCGA-KH-A6WC-01;TCGA-L5-A43H-01;TCGA-L5-A4OM-01;TCGA-L5-A88S-01;TCGA-L5-A88W-01;TCGA-L5-A88Z-01;TCGA-L5-A8NK-01…	TCGA-IG-A51D-01;TCGA-IG-A6QS-01;TCGA-JY-A6FA-01;TCGA-LN-A49K-01;TCGA-LN-A49L-01;TCGA-LN-A49S-01;TCGA-LN-A49V-01;TCGA-LN-A49X-01;TCGA-LN-A4A1-01;TCGA-LN-A4A3-01;TCGA-LN-A5U5-01;TCGA-LN-A5U6-01;TCGA-LN-A7HY-01;TCGA-LN-A9FR-01;TCGA-S8-A6BW-01;TCGA-VR-A8EO-01;TCGA-VR-A8ER-01;TCGA-VR-AA7B-01	no_validation_or_external_data_used
outer	4	4		RNA_rank_activity	TCGA_Hallmark_RNA_rank_activity_C01v1	z_score	outer_training_samples_only	outer_validation_samples	74	18	TCGA-IG-A3I8-01;TCGA-IG-A3YA-01;TCGA-IG-A3YB-01;TCGA-IG-A4P3-01;TCGA-IG-A4QT-01;TCGA-IG-A50L-01;TCGA-IG-A51D-01;TCGA-IG-A5B8-01;TCGA-IG-A5S3-01;TCGA-IG-A625-01;TCGA-IG-A6QS-01;TCGA-IG-A8O2-01;TCGA-IG-A97H-01;TCGA-IG-A97I-01;TCGA-JY-A6FA-01;TCGA-JY-A6FD-01;TCGA-JY-A6FE-01;TCGA-JY-A6FG-01;TCGA-JY-A93F-01;TCGA-KH-A6WC-01;TCGA-L5-A43H-01;TCGA-L5-A4OM-01;TCGA-L5-A88W-01;TCGA-L5-A88Z-01;TCGA-L5-A8NK-01…	TCGA-IG-A3QL-01;TCGA-IG-A3Y9-01;TCGA-L5-A88S-01;TCGA-L5-A8NQ-01;TCGA-LN-A49M-01;TCGA-LN-A49P-01;TCGA-LN-A49Y-01;TCGA-LN-A4A5-01;TCGA-LN-A4A8-01;TCGA-LN-A4MR-01;TCGA-LN-A7HV-01;TCGA-LN-A9FP-01;TCGA-LN-A9FQ-01;TCGA-Q9-A6FU-01;TCGA-VR-A8EU-01;TCGA-VR-A8EW-01;TCGA-Z6-A8JE-01;TCGA-Z6-AAPN-01	no_validation_or_external_data_used
outer	4	4		CNV_abs_burden	TCGA_Hallmark_CNV_abs_burden_C01v1	z_score	outer_training_samples_only	outer_validation_samples	74	18	TCGA-IG-A3I8-01;TCGA-IG-A3YA-01;TCGA-IG-A3YB-01;TCGA-IG-A4P3-01;TCGA-IG-A4QT-01;TCGA-IG-A50L-01;TCGA-IG-A51D-01;TCGA-IG-A5B8-01;TCGA-IG-A5S3-01;TCGA-IG-A625-01;TCGA-IG-A6QS-01;TCGA-IG-A8O2-01;TCGA-IG-A97H-01;TCGA-IG-A97I-01;TCGA-JY-A6FA-01;TCGA-JY-A6FD-01;TCGA-JY-A6FE-01;TCGA-JY-A6FG-01;TCGA-JY-A93F-01;TCGA-KH-A6WC-01;TCGA-L5-A43H-01;TCGA-L5-A4OM-01;TCGA-L5-A88W-01;TCGA-L5-A88Z-01;TCGA-L5-A8NK-01…	TCGA-IG-A3QL-01;TCGA-IG-A3Y9-01;TCGA-L5-A88S-01;TCGA-L5-A8NQ-01;TCGA-LN-A49M-01;TCGA-LN-A49P-01;TCGA-LN-A49Y-01;TCGA-LN-A4A5-01;TCGA-LN-A4A8-01;TCGA-LN-A4MR-01;TCGA-LN-A7HV-01;TCGA-LN-A9FP-01;TCGA-LN-A9FQ-01;TCGA-Q9-A6FU-01;TCGA-VR-A8EU-01;TCGA-VR-A8EW-01;TCGA-Z6-A8JE-01;TCGA-Z6-AAPN-01	no_validation_or_external_data_used
outer	4	4		METH_promoter_state	TCGA_Hallmark_METH_promoter_state_C01v1	z_score	outer_training_samples_only	outer_validation_samples	74	18	TCGA-IG-A3I8-01;TCGA-IG-A3YA-01;TCGA-IG-A3YB-01;TCGA-IG-A4P3-01;TCGA-IG-A4QT-01;TCGA-IG-A50L-01;TCGA-IG-A51D-01;TCGA-IG-A5B8-01;TCGA-IG-A5S3-01;TCGA-IG-A625-01;TCGA-IG-A6QS-01;TCGA-IG-A8O2-01;TCGA-IG-A97H-01;TCGA-IG-A97I-01;TCGA-JY-A6FA-01;TCGA-JY-A6FD-01;TCGA-JY-A6FE-01;TCGA-JY-A6FG-01;TCGA-JY-A93F-01;TCGA-KH-A6WC-01;TCGA-L5-A43H-01;TCGA-L5-A4OM-01;TCGA-L5-A88W-01;TCGA-L5-A88Z-01;TCGA-L5-A8NK-01…	TCGA-IG-A3QL-01;TCGA-IG-A3Y9-01;TCGA-L5-A88S-01;TCGA-L5-A8NQ-01;TCGA-LN-A49M-01;TCGA-LN-A49P-01;TCGA-LN-A49Y-01;TCGA-LN-A4A5-01;TCGA-LN-A4A8-01;TCGA-LN-A4MR-01;TCGA-LN-A7HV-01;TCGA-LN-A9FP-01;TCGA-LN-A9FQ-01;TCGA-Q9-A6FU-01;TCGA-VR-A8EU-01;TCGA-VR-A8EW-01;TCGA-Z6-A8JE-01;TCGA-Z6-AAPN-01	no_validation_or_external_data_used
outer	4	5		RNA_rank_activity	TCGA_Hallmark_RNA_rank_activity_C01v1	z_score	outer_training_samples_only	outer_validation_samples	74	18	TCGA-IG-A3I8-01;TCGA-IG-A3QL-01;TCGA-IG-A3Y9-01;TCGA-IG-A3YA-01;TCGA-IG-A50L-01;TCGA-IG-A51D-01;TCGA-IG-A5B8-01;TCGA-IG-A625-01;TCGA-IG-A6QS-01;TCGA-IG-A8O2-01;TCGA-IG-A97H-01;TCGA-JY-A6FA-01;TCGA-JY-A6FE-01;TCGA-JY-A6FG-01;TCGA-JY-A93F-01;TCGA-KH-A6WC-01;TCGA-L5-A43H-01;TCGA-L5-A4OM-01;TCGA-L5-A88S-01;TCGA-L5-A88W-01;TCGA-L5-A88Z-01;TCGA-L5-A8NK-01;TCGA-L5-A8NQ-01;TCGA-L7-A56G-01;TCGA-LN-A49K-01…	TCGA-IG-A3YB-01;TCGA-IG-A4P3-01;TCGA-IG-A4QT-01;TCGA-IG-A5S3-01;TCGA-IG-A97I-01;TCGA-JY-A6FD-01;TCGA-LN-A49U-01;TCGA-LN-A5U7-01;TCGA-LN-A8HZ-01;TCGA-LN-A8I0-01;TCGA-LN-A8I1-01;TCGA-LN-A9FO-01;TCGA-V5-A7RC-01;TCGA-VR-A8EX-01;TCGA-VR-A8EZ-01;TCGA-VR-A8Q7-01;TCGA-XP-A8T6-01;TCGA-Z6-A9VB-01	no_validation_or_external_data_used
outer	4	5		CNV_abs_burden	TCGA_Hallmark_CNV_abs_burden_C01v1	z_score	outer_training_samples_only	outer_validation_samples	74	18	TCGA-IG-A3I8-01;TCGA-IG-A3QL-01;TCGA-IG-A3Y9-01;TCGA-IG-A3YA-01;TCGA-IG-A50L-01;TCGA-IG-A51D-01;TCGA-IG-A5B8-01;TCGA-IG-A625-01;TCGA-IG-A6QS-01;TCGA-IG-A8O2-01;TCGA-IG-A97H-01;TCGA-JY-A6FA-01;TCGA-JY-A6FE-01;TCGA-JY-A6FG-01;TCGA-JY-A93F-01;TCGA-KH-A6WC-01;TCGA-L5-A43H-01;TCGA-L5-A4OM-01;TCGA-L5-A88S-01;TCGA-L5-A88W-01;TCGA-L5-A88Z-01;TCGA-L5-A8NK-01;TCGA-L5-A8NQ-01;TCGA-L7-A56G-01;TCGA-LN-A49K-01…	TCGA-IG-A3YB-01;TCGA-IG-A4P3-01;TCGA-IG-A4QT-01;TCGA-IG-A5S3-01;TCGA-IG-A97I-01;TCGA-JY-A6FD-01;TCGA-LN-A49U-01;TCGA-LN-A5U7-01;TCGA-LN-A8HZ-01;TCGA-LN-A8I0-01;TCGA-LN-A8I1-01;TCGA-LN-A9FO-01;TCGA-V5-A7RC-01;TCGA-VR-A8EX-01;TCGA-VR-A8EZ-01;TCGA-VR-A8Q7-01;TCGA-XP-A8T6-01;TCGA-Z6-A9VB-01	no_validation_or_external_data_used
outer	4	5		METH_promoter_state	TCGA_Hallmark_METH_promoter_state_C01v1	z_score	outer_training_samples_only	outer_validation_samples	74	18	TCGA-IG-A3I8-01;TCGA-IG-A3QL-01;TCGA-IG-A3Y9-01;TCGA-IG-A3YA-01;TCGA-IG-A50L-01;TCGA-IG-A51D-01;TCGA-IG-A5B8-01;TCGA-IG-A625-01;TCGA-IG-A6QS-01;TCGA-IG-A8O2-01;TCGA-IG-A97H-01;TCGA-JY-A6FA-01;TCGA-JY-A6FE-01;TCGA-JY-A6FG-01;TCGA-JY-A93F-01;TCGA-KH-A6WC-01;TCGA-L5-A43H-01;TCGA-L5-A4OM-01;TCGA-L5-A88S-01;TCGA-L5-A88W-01;TCGA-L5-A88Z-01;TCGA-L5-A8NK-01;TCGA-L5-A8NQ-01;TCGA-L7-A56G-01;TCGA-LN-A49K-01…	TCGA-IG-A3YB-01;TCGA-IG-A4P3-01;TCGA-IG-A4QT-01;TCGA-IG-A5S3-01;TCGA-IG-A97I-01;TCGA-JY-A6FD-01;TCGA-LN-A49U-01;TCGA-LN-A5U7-01;TCGA-LN-A8HZ-01;TCGA-LN-A8I0-01;TCGA-LN-A8I1-01;TCGA-LN-A9FO-01;TCGA-V5-A7RC-01;TCGA-VR-A8EX-01;TCGA-VR-A8EZ-01;TCGA-VR-A8Q7-01;TCGA-XP-A8T6-01;TCGA-Z6-A9VB-01	no_validation_or_external_data_used
outer	5	1		RNA_rank_activity	TCGA_Hallmark_RNA_rank_activity_C01v1	z_score	outer_training_samples_only	outer_validation_samples	72	20	TCGA-IG-A3I8-01;TCGA-IG-A3QL-01;TCGA-IG-A3YB-01;TCGA-IG-A4P3-01;TCGA-IG-A50L-01;TCGA-IG-A5B8-01;TCGA-IG-A5S3-01;TCGA-IG-A625-01;TCGA-IG-A6QS-01;TCGA-IG-A8O2-01;TCGA-IG-A97H-01;TCGA-IG-A97I-01;TCGA-JY-A6FA-01;TCGA-JY-A6FD-01;TCGA-JY-A6FE-01;TCGA-JY-A6FG-01;TCGA-JY-A93F-01;TCGA-KH-A6WC-01;TCGA-L5-A43H-01;TCGA-L5-A88S-01;TCGA-L5-A88W-01;TCGA-L5-A88Z-01;TCGA-L5-A8NK-01;TCGA-LN-A49K-01;TCGA-LN-A49L-01…	TCGA-IG-A3Y9-01;TCGA-IG-A3YA-01;TCGA-IG-A4QT-01;TCGA-IG-A51D-01;TCGA-L5-A4OM-01;TCGA-L5-A8NQ-01;TCGA-L7-A56G-01;TCGA-LN-A49R-01;TCGA-LN-A49V-01;TCGA-LN-A4A3-01;TCGA-LN-A4A4-01;TCGA-LN-A7HW-01;TCGA-LN-A8HZ-01;TCGA-LN-A8I1-01;TCGA-LN-A9FO-01;TCGA-VR-A8EP-01;TCGA-VR-A8ET-01;TCGA-VR-A8EU-01;TCGA-VR-A8Q7-01;TCGA-Z6-A8JE-01	no_validation_or_external_data_used
outer	5	1		CNV_abs_burden	TCGA_Hallmark_CNV_abs_burden_C01v1	z_score	outer_training_samples_only	outer_validation_samples	72	20	TCGA-IG-A3I8-01;TCGA-IG-A3QL-01;TCGA-IG-A3YB-01;TCGA-IG-A4P3-01;TCGA-IG-A50L-01;TCGA-IG-A5B8-01;TCGA-IG-A5S3-01;TCGA-IG-A625-01;TCGA-IG-A6QS-01;TCGA-IG-A8O2-01;TCGA-IG-A97H-01;TCGA-IG-A97I-01;TCGA-JY-A6FA-01;TCGA-JY-A6FD-01;TCGA-JY-A6FE-01;TCGA-JY-A6FG-01;TCGA-JY-A93F-01;TCGA-KH-A6WC-01;TCGA-L5-A43H-01;TCGA-L5-A88S-01;TCGA-L5-A88W-01;TCGA-L5-A88Z-01;TCGA-L5-A8NK-01;TCGA-LN-A49K-01;TCGA-LN-A49L-01…	TCGA-IG-A3Y9-01;TCGA-IG-A3YA-01;TCGA-IG-A4QT-01;TCGA-IG-A51D-01;TCGA-L5-A4OM-01;TCGA-L5-A8NQ-01;TCGA-L7-A56G-01;TCGA-LN-A49R-01;TCGA-LN-A49V-01;TCGA-LN-A4A3-01;TCGA-LN-A4A4-01;TCGA-LN-A7HW-01;TCGA-LN-A8HZ-01;TCGA-LN-A8I1-01;TCGA-LN-A9FO-01;TCGA-VR-A8EP-01;TCGA-VR-A8ET-01;TCGA-VR-A8EU-01;TCGA-VR-A8Q7-01;TCGA-Z6-A8JE-01	no_validation_or_external_data_used
outer	5	1		METH_promoter_state	TCGA_Hallmark_METH_promoter_state_C01v1	z_score	outer_training_samples_only	outer_validation_samples	72	20	TCGA-IG-A3I8-01;TCGA-IG-A3QL-01;TCGA-IG-A3YB-01;TCGA-IG-A4P3-01;TCGA-IG-A50L-01;TCGA-IG-A5B8-01;TCGA-IG-A5S3-01;TCGA-IG-A625-01;TCGA-IG-A6QS-01;TCGA-IG-A8O2-01;TCGA-IG-A97H-01;TCGA-IG-A97I-01;TCGA-JY-A6FA-01;TCGA-JY-A6FD-01;TCGA-JY-A6FE-01;TCGA-JY-A6FG-01;TCGA-JY-A93F-01;TCGA-KH-A6WC-01;TCGA-L5-A43H-01;TCGA-L5-A88S-01;TCGA-L5-A88W-01;TCGA-L5-A88Z-01;TCGA-L5-A8NK-01;TCGA-LN-A49K-01;TCGA-LN-A49L-01…	TCGA-IG-A3Y9-01;TCGA-IG-A3YA-01;TCGA-IG-A4QT-01;TCGA-IG-A51D-01;TCGA-L5-A4OM-01;TCGA-L5-A8NQ-01;TCGA-L7-A56G-01;TCGA-LN-A49R-01;TCGA-LN-A49V-01;TCGA-LN-A4A3-01;TCGA-LN-A4A4-01;TCGA-LN-A7HW-01;TCGA-LN-A8HZ-01;TCGA-LN-A8I1-01;TCGA-LN-A9FO-01;TCGA-VR-A8EP-01;TCGA-VR-A8ET-01;TCGA-VR-A8EU-01;TCGA-VR-A8Q7-01;TCGA-Z6-A8JE-01	no_validation_or_external_data_used
outer	5	2		RNA_rank_activity	TCGA_Hallmark_RNA_rank_activity_C01v1	z_score	outer_training_samples_only	outer_validation_samples	74	18	TCGA-IG-A3I8-01;TCGA-IG-A3Y9-01;TCGA-IG-A3YA-01;TCGA-IG-A3YB-01;TCGA-IG-A4P3-01;TCGA-IG-A4QT-01;TCGA-IG-A50L-01;TCGA-IG-A51D-01;TCGA-IG-A5B8-01;TCGA-IG-A6QS-01;TCGA-IG-A8O2-01;TCGA-IG-A97H-01;TCGA-JY-A6FA-01;TCGA-JY-A6FD-01;TCGA-JY-A6FE-01;TCGA-JY-A93F-01;TCGA-KH-A6WC-01;TCGA-L5-A43H-01;TCGA-L5-A4OM-01;TCGA-L5-A88W-01;TCGA-L5-A88Z-01;TCGA-L5-A8NK-01;TCGA-L5-A8NQ-01;TCGA-L7-A56G-01;TCGA-LN-A49K-01…	TCGA-IG-A3QL-01;TCGA-IG-A5S3-01;TCGA-IG-A625-01;TCGA-IG-A97I-01;TCGA-JY-A6FG-01;TCGA-L5-A88S-01;TCGA-LN-A49P-01;TCGA-LN-A49U-01;TCGA-LN-A49Y-01;TCGA-LN-A4MQ-01;TCGA-LN-A5U5-01;TCGA-LN-A5U7-01;TCGA-LN-A7HZ-01;TCGA-LN-A8I0-01;TCGA-VR-A8EW-01;TCGA-VR-A8EX-01;TCGA-XP-A8T6-01;TCGA-XP-A8T8-01	no_validation_or_external_data_used
outer	5	2		CNV_abs_burden	TCGA_Hallmark_CNV_abs_burden_C01v1	z_score	outer_training_samples_only	outer_validation_samples	74	18	TCGA-IG-A3I8-01;TCGA-IG-A3Y9-01;TCGA-IG-A3YA-01;TCGA-IG-A3YB-01;TCGA-IG-A4P3-01;TCGA-IG-A4QT-01;TCGA-IG-A50L-01;TCGA-IG-A51D-01;TCGA-IG-A5B8-01;TCGA-IG-A6QS-01;TCGA-IG-A8O2-01;TCGA-IG-A97H-01;TCGA-JY-A6FA-01;TCGA-JY-A6FD-01;TCGA-JY-A6FE-01;TCGA-JY-A93F-01;TCGA-KH-A6WC-01;TCGA-L5-A43H-01;TCGA-L5-A4OM-01;TCGA-L5-A88W-01;TCGA-L5-A88Z-01;TCGA-L5-A8NK-01;TCGA-L5-A8NQ-01;TCGA-L7-A56G-01;TCGA-LN-A49K-01…	TCGA-IG-A3QL-01;TCGA-IG-A5S3-01;TCGA-IG-A625-01;TCGA-IG-A97I-01;TCGA-JY-A6FG-01;TCGA-L5-A88S-01;TCGA-LN-A49P-01;TCGA-LN-A49U-01;TCGA-LN-A49Y-01;TCGA-LN-A4MQ-01;TCGA-LN-A5U5-01;TCGA-LN-A5U7-01;TCGA-LN-A7HZ-01;TCGA-LN-A8I0-01;TCGA-VR-A8EW-01;TCGA-VR-A8EX-01;TCGA-XP-A8T6-01;TCGA-XP-A8T8-01	no_validation_or_external_data_used
outer	5	2		METH_promoter_state	TCGA_Hallmark_METH_promoter_state_C01v1	z_score	outer_training_samples_only	outer_validation_samples	74	18	TCGA-IG-A3I8-01;TCGA-IG-A3Y9-01;TCGA-IG-A3YA-01;TCGA-IG-A3YB-01;TCGA-IG-A4P3-01;TCGA-IG-A4QT-01;TCGA-IG-A50L-01;TCGA-IG-A51D-01;TCGA-IG-A5B8-01;TCGA-IG-A6QS-01;TCGA-IG-A8O2-01;TCGA-IG-A97H-01;TCGA-JY-A6FA-01;TCGA-JY-A6FD-01;TCGA-JY-A6FE-01;TCGA-JY-A93F-01;TCGA-KH-A6WC-01;TCGA-L5-A43H-01;TCGA-L5-A4OM-01;TCGA-L5-A88W-01;TCGA-L5-A88Z-01;TCGA-L5-A8NK-01;TCGA-L5-A8NQ-01;TCGA-L7-A56G-01;TCGA-LN-A49K-01…	TCGA-IG-A3QL-01;TCGA-IG-A5S3-01;TCGA-IG-A625-01;TCGA-IG-A97I-01;TCGA-JY-A6FG-01;TCGA-L5-A88S-01;TCGA-LN-A49P-01;TCGA-LN-A49U-01;TCGA-LN-A49Y-01;TCGA-LN-A4MQ-01;TCGA-LN-A5U5-01;TCGA-LN-A5U7-01;TCGA-LN-A7HZ-01;TCGA-LN-A8I0-01;TCGA-VR-A8EW-01;TCGA-VR-A8EX-01;TCGA-XP-A8T6-01;TCGA-XP-A8T8-01	no_validation_or_external_data_used
outer	5	3		RNA_rank_activity	TCGA_Hallmark_RNA_rank_activity_C01v1	z_score	outer_training_samples_only	outer_validation_samples	74	18	TCGA-IG-A3QL-01;TCGA-IG-A3Y9-01;TCGA-IG-A3YA-01;TCGA-IG-A4P3-01;TCGA-IG-A4QT-01;TCGA-IG-A50L-01;TCGA-IG-A51D-01;TCGA-IG-A5B8-01;TCGA-IG-A5S3-01;TCGA-IG-A625-01;TCGA-IG-A8O2-01;TCGA-IG-A97H-01;TCGA-IG-A97I-01;TCGA-JY-A6FA-01;TCGA-JY-A6FD-01;TCGA-JY-A6FE-01;TCGA-JY-A6FG-01;TCGA-JY-A93F-01;TCGA-KH-A6WC-01;TCGA-L5-A43H-01;TCGA-L5-A4OM-01;TCGA-L5-A88S-01;TCGA-L5-A88W-01;TCGA-L5-A8NK-01;TCGA-L5-A8NQ-01…	TCGA-IG-A3I8-01;TCGA-IG-A3YB-01;TCGA-IG-A6QS-01;TCGA-L5-A88Z-01;TCGA-LN-A49K-01;TCGA-LN-A49N-01;TCGA-LN-A49W-01;TCGA-LN-A4A1-01;TCGA-LN-A4A2-01;TCGA-LN-A4A8-01;TCGA-LN-A4A9-01;TCGA-LN-A7HV-01;TCGA-LN-A7HY-01;TCGA-Q9-A6FU-01;TCGA-S8-A6BW-01;TCGA-V5-AASV-01;TCGA-VR-AA7D-01;TCGA-VR-AA7I-01	no_validation_or_external_data_used
outer	5	3		CNV_abs_burden	TCGA_Hallmark_CNV_abs_burden_C01v1	z_score	outer_training_samples_only	outer_validation_samples	74	18	TCGA-IG-A3QL-01;TCGA-IG-A3Y9-01;TCGA-IG-A3YA-01;TCGA-IG-A4P3-01;TCGA-IG-A4QT-01;TCGA-IG-A50L-01;TCGA-IG-A51D-01;TCGA-IG-A5B8-01;TCGA-IG-A5S3-01;TCGA-IG-A625-01;TCGA-IG-A8O2-01;TCGA-IG-A97H-01;TCGA-IG-A97I-01;TCGA-JY-A6FA-01;TCGA-JY-A6FD-01;TCGA-JY-A6FE-01;TCGA-JY-A6FG-01;TCGA-JY-A93F-01;TCGA-KH-A6WC-01;TCGA-L5-A43H-01;TCGA-L5-A4OM-01;TCGA-L5-A88S-01;TCGA-L5-A88W-01;TCGA-L5-A8NK-01;TCGA-L5-A8NQ-01…	TCGA-IG-A3I8-01;TCGA-IG-A3YB-01;TCGA-IG-A6QS-01;TCGA-L5-A88Z-01;TCGA-LN-A49K-01;TCGA-LN-A49N-01;TCGA-LN-A49W-01;TCGA-LN-A4A1-01;TCGA-LN-A4A2-01;TCGA-LN-A4A8-01;TCGA-LN-A4A9-01;TCGA-LN-A7HV-01;TCGA-LN-A7HY-01;TCGA-Q9-A6FU-01;TCGA-S8-A6BW-01;TCGA-V5-AASV-01;TCGA-VR-AA7D-01;TCGA-VR-AA7I-01	no_validation_or_external_data_used
outer	5	3		METH_promoter_state	TCGA_Hallmark_METH_promoter_state_C01v1	z_score	outer_training_samples_only	outer_validation_samples	74	18	TCGA-IG-A3QL-01;TCGA-IG-A3Y9-01;TCGA-IG-A3YA-01;TCGA-IG-A4P3-01;TCGA-IG-A4QT-01;TCGA-IG-A50L-01;TCGA-IG-A51D-01;TCGA-IG-A5B8-01;TCGA-IG-A5S3-01;TCGA-IG-A625-01;TCGA-IG-A8O2-01;TCGA-IG-A97H-01;TCGA-IG-A97I-01;TCGA-JY-A6FA-01;TCGA-JY-A6FD-01;TCGA-JY-A6FE-01;TCGA-JY-A6FG-01;TCGA-JY-A93F-01;TCGA-KH-A6WC-01;TCGA-L5-A43H-01;TCGA-L5-A4OM-01;TCGA-L5-A88S-01;TCGA-L5-A88W-01;TCGA-L5-A8NK-01;TCGA-L5-A8NQ-01…	TCGA-IG-A3I8-01;TCGA-IG-A3YB-01;TCGA-IG-A6QS-01;TCGA-L5-A88Z-01;TCGA-LN-A49K-01;TCGA-LN-A49N-01;TCGA-LN-A49W-01;TCGA-LN-A4A1-01;TCGA-LN-A4A2-01;TCGA-LN-A4A8-01;TCGA-LN-A4A9-01;TCGA-LN-A7HV-01;TCGA-LN-A7HY-01;TCGA-Q9-A6FU-01;TCGA-S8-A6BW-01;TCGA-V5-AASV-01;TCGA-VR-AA7D-01;TCGA-VR-AA7I-01	no_validation_or_external_data_used
outer	5	4		RNA_rank_activity	TCGA_Hallmark_RNA_rank_activity_C01v1	z_score	outer_training_samples_only	outer_validation_samples	74	18	TCGA-IG-A3I8-01;TCGA-IG-A3QL-01;TCGA-IG-A3Y9-01;TCGA-IG-A3YA-01;TCGA-IG-A3YB-01;TCGA-IG-A4P3-01;TCGA-IG-A4QT-01;TCGA-IG-A50L-01;TCGA-IG-A51D-01;TCGA-IG-A5B8-01;TCGA-IG-A5S3-01;TCGA-IG-A625-01;TCGA-IG-A6QS-01;TCGA-IG-A8O2-01;TCGA-IG-A97I-01;TCGA-JY-A6FD-01;TCGA-JY-A6FE-01;TCGA-JY-A6FG-01;TCGA-JY-A93F-01;TCGA-KH-A6WC-01;TCGA-L5-A43H-01;TCGA-L5-A4OM-01;TCGA-L5-A88S-01;TCGA-L5-A88Z-01;TCGA-L5-A8NK-01…	TCGA-IG-A97H-01;TCGA-JY-A6FA-01;TCGA-L5-A88W-01;TCGA-LN-A49L-01;TCGA-LN-A49O-01;TCGA-LN-A49S-01;TCGA-LN-A49X-01;TCGA-LN-A4A6-01;TCGA-LN-A4MR-01;TCGA-LN-A9FP-01;TCGA-LN-A9FQ-01;TCGA-LN-A9FR-01;TCGA-V5-A7RC-01;TCGA-VR-A8EO-01;TCGA-VR-A8ER-01;TCGA-VR-A8EY-01;TCGA-VR-A8EZ-01;TCGA-VR-AA4G-01	no_validation_or_external_data_used
outer	5	4		CNV_abs_burden	TCGA_Hallmark_CNV_abs_burden_C01v1	z_score	outer_training_samples_only	outer_validation_samples	74	18	TCGA-IG-A3I8-01;TCGA-IG-A3QL-01;TCGA-IG-A3Y9-01;TCGA-IG-A3YA-01;TCGA-IG-A3YB-01;TCGA-IG-A4P3-01;TCGA-IG-A4QT-01;TCGA-IG-A50L-01;TCGA-IG-A51D-01;TCGA-IG-A5B8-01;TCGA-IG-A5S3-01;TCGA-IG-A625-01;TCGA-IG-A6QS-01;TCGA-IG-A8O2-01;TCGA-IG-A97I-01;TCGA-JY-A6FD-01;TCGA-JY-A6FE-01;TCGA-JY-A6FG-01;TCGA-JY-A93F-01;TCGA-KH-A6WC-01;TCGA-L5-A43H-01;TCGA-L5-A4OM-01;TCGA-L5-A88S-01;TCGA-L5-A88Z-01;TCGA-L5-A8NK-01…	TCGA-IG-A97H-01;TCGA-JY-A6FA-01;TCGA-L5-A88W-01;TCGA-LN-A49L-01;TCGA-LN-A49O-01;TCGA-LN-A49S-01;TCGA-LN-A49X-01;TCGA-LN-A4A6-01;TCGA-LN-A4MR-01;TCGA-LN-A9FP-01;TCGA-LN-A9FQ-01;TCGA-LN-A9FR-01;TCGA-V5-A7RC-01;TCGA-VR-A8EO-01;TCGA-VR-A8ER-01;TCGA-VR-A8EY-01;TCGA-VR-A8EZ-01;TCGA-VR-AA4G-01	no_validation_or_external_data_used
outer	5	4		METH_promoter_state	TCGA_Hallmark_METH_promoter_state_C01v1	z_score	outer_training_samples_only	outer_validation_samples	74	18	TCGA-IG-A3I8-01;TCGA-IG-A3QL-01;TCGA-IG-A3Y9-01;TCGA-IG-A3YA-01;TCGA-IG-A3YB-01;TCGA-IG-A4P3-01;TCGA-IG-A4QT-01;TCGA-IG-A50L-01;TCGA-IG-A51D-01;TCGA-IG-A5B8-01;TCGA-IG-A5S3-01;TCGA-IG-A625-01;TCGA-IG-A6QS-01;TCGA-IG-A8O2-01;TCGA-IG-A97I-01;TCGA-JY-A6FD-01;TCGA-JY-A6FE-01;TCGA-JY-A6FG-01;TCGA-JY-A93F-01;TCGA-KH-A6WC-01;TCGA-L5-A43H-01;TCGA-L5-A4OM-01;TCGA-L5-A88S-01;TCGA-L5-A88Z-01;TCGA-L5-A8NK-01…	TCGA-IG-A97H-01;TCGA-JY-A6FA-01;TCGA-L5-A88W-01;TCGA-LN-A49L-01;TCGA-LN-A49O-01;TCGA-LN-A49S-01;TCGA-LN-A49X-01;TCGA-LN-A4A6-01;TCGA-LN-A4MR-01;TCGA-LN-A9FP-01;TCGA-LN-A9FQ-01;TCGA-LN-A9FR-01;TCGA-V5-A7RC-01;TCGA-VR-A8EO-01;TCGA-VR-A8ER-01;TCGA-VR-A8EY-01;TCGA-VR-A8EZ-01;TCGA-VR-AA4G-01	no_validation_or_external_data_used
outer	5	5		RNA_rank_activity	TCGA_Hallmark_RNA_rank_activity_C01v1	z_score	outer_training_samples_only	outer_validation_samples	74	18	TCGA-IG-A3I8-01;TCGA-IG-A3QL-01;TCGA-IG-A3Y9-01;TCGA-IG-A3YA-01;TCGA-IG-A3YB-01;TCGA-IG-A4QT-01;TCGA-IG-A51D-01;TCGA-IG-A5S3-01;TCGA-IG-A625-01;TCGA-IG-A6QS-01;TCGA-IG-A97H-01;TCGA-IG-A97I-01;TCGA-JY-A6FA-01;TCGA-JY-A6FG-01;TCGA-L5-A4OM-01;TCGA-L5-A88S-01;TCGA-L5-A88W-01;TCGA-L5-A88Z-01;TCGA-L5-A8NQ-01;TCGA-L7-A56G-01;TCGA-LN-A49K-01;TCGA-LN-A49L-01;TCGA-LN-A49N-01;TCGA-LN-A49O-01;TCGA-LN-A49P-01…	TCGA-IG-A4P3-01;TCGA-IG-A50L-01;TCGA-IG-A5B8-01;TCGA-IG-A8O2-01;TCGA-JY-A6FD-01;TCGA-JY-A6FE-01;TCGA-JY-A93F-01;TCGA-KH-A6WC-01;TCGA-L5-A43H-01;TCGA-L5-A8NK-01;TCGA-LN-A49M-01;TCGA-LN-A4A5-01;TCGA-LN-A5U6-01;TCGA-LN-A7HX-01;TCGA-VR-AA7B-01;TCGA-Z6-A8JD-01;TCGA-Z6-A9VB-01;TCGA-Z6-AAPN-01	no_validation_or_external_data_used
outer	5	5		CNV_abs_burden	TCGA_Hallmark_CNV_abs_burden_C01v1	z_score	outer_training_samples_only	outer_validation_samples	74	18	TCGA-IG-A3I8-01;TCGA-IG-A3QL-01;TCGA-IG-A3Y9-01;TCGA-IG-A3YA-01;TCGA-IG-A3YB-01;TCGA-IG-A4QT-01;TCGA-IG-A51D-01;TCGA-IG-A5S3-01;TCGA-IG-A625-01;TCGA-IG-A6QS-01;TCGA-IG-A97H-01;TCGA-IG-A97I-01;TCGA-JY-A6FA-01;TCGA-JY-A6FG-01;TCGA-L5-A4OM-01;TCGA-L5-A88S-01;TCGA-L5-A88W-01;TCGA-L5-A88Z-01;TCGA-L5-A8NQ-01;TCGA-L7-A56G-01;TCGA-LN-A49K-01;TCGA-LN-A49L-01;TCGA-LN-A49N-01;TCGA-LN-A49O-01;TCGA-LN-A49P-01…	TCGA-IG-A4P3-01;TCGA-IG-A50L-01;TCGA-IG-A5B8-01;TCGA-IG-A8O2-01;TCGA-JY-A6FD-01;TCGA-JY-A6FE-01;TCGA-JY-A93F-01;TCGA-KH-A6WC-01;TCGA-L5-A43H-01;TCGA-L5-A8NK-01;TCGA-LN-A49M-01;TCGA-LN-A4A5-01;TCGA-LN-A5U6-01;TCGA-LN-A7HX-01;TCGA-VR-AA7B-01;TCGA-Z6-A8JD-01;TCGA-Z6-A9VB-01;TCGA-Z6-AAPN-01	no_validation_or_external_data_used
outer	5	5		METH_promoter_state	TCGA_Hallmark_METH_promoter_state_C01v1	z_score	outer_training_samples_only	outer_validation_samples	74	18	TCGA-IG-A3I8-01;TCGA-IG-A3QL-01;TCGA-IG-A3Y9-01;TCGA-IG-A3YA-01;TCGA-IG-A3YB-01;TCGA-IG-A4QT-01;TCGA-IG-A51D-01;TCGA-IG-A5S3-01;TCGA-IG-A625-01;TCGA-IG-A6QS-01;TCGA-IG-A97H-01;TCGA-IG-A97I-01;TCGA-JY-A6FA-01;TCGA-JY-A6FG-01;TCGA-L5-A4OM-01;TCGA-L5-A88S-01;TCGA-L5-A88W-01;TCGA-L5-A88Z-01;TCGA-L5-A8NQ-01;TCGA-L7-A56G-01;TCGA-LN-A49K-01;TCGA-LN-A49L-01;TCGA-LN-A49N-01;TCGA-LN-A49O-01;TCGA-LN-A49P-01…	TCGA-IG-A4P3-01;TCGA-IG-A50L-01;TCGA-IG-A5B8-01;TCGA-IG-A8O2-01;TCGA-JY-A6FD-01;TCGA-JY-A6FE-01;TCGA-JY-A93F-01;TCGA-KH-A6WC-01;TCGA-L5-A43H-01;TCGA-L5-A8NK-01;TCGA-LN-A49M-01;TCGA-LN-A4A5-01;TCGA-LN-A5U6-01;TCGA-LN-A7HX-01;TCGA-VR-AA7B-01;TCGA-Z6-A8JD-01;TCGA-Z6-A9VB-01;TCGA-Z6-AAPN-01	no_validation_or_external_data_used
outer	6	1		RNA_rank_activity	TCGA_Hallmark_RNA_rank_activity_C01v1	z_score	outer_training_samples_only	outer_validation_samples	72	20	TCGA-IG-A3QL-01;TCGA-IG-A3Y9-01;TCGA-IG-A3YA-01;TCGA-IG-A3YB-01;TCGA-IG-A4P3-01;TCGA-IG-A4QT-01;TCGA-IG-A50L-01;TCGA-IG-A625-01;TCGA-IG-A8O2-01;TCGA-IG-A97H-01;TCGA-IG-A97I-01;TCGA-JY-A6FA-01;TCGA-JY-A6FE-01;TCGA-JY-A6FG-01;TCGA-KH-A6WC-01;TCGA-L5-A43H-01;TCGA-L5-A4OM-01;TCGA-L5-A88S-01;TCGA-L5-A88Z-01;TCGA-L5-A8NK-01;TCGA-L5-A8NQ-01;TCGA-L7-A56G-01;TCGA-LN-A49L-01;TCGA-LN-A49M-01;TCGA-LN-A49N-01…	TCGA-IG-A3I8-01;TCGA-IG-A51D-01;TCGA-IG-A5B8-01;TCGA-IG-A5S3-01;TCGA-IG-A6QS-01;TCGA-JY-A6FD-01;TCGA-JY-A93F-01;TCGA-L5-A88W-01;TCGA-LN-A49K-01;TCGA-LN-A49V-01;TCGA-LN-A4A6-01;TCGA-LN-A4A8-01;TCGA-LN-A4A9-01;TCGA-LN-A7HZ-01;TCGA-LN-A9FQ-01;TCGA-V5-AASV-01;TCGA-VR-A8ER-01;TCGA-VR-A8EW-01;TCGA-VR-AA7B-01;TCGA-Z6-A8JE-01	no_validation_or_external_data_used
outer	6	1		CNV_abs_burden	TCGA_Hallmark_CNV_abs_burden_C01v1	z_score	outer_training_samples_only	outer_validation_samples	72	20	TCGA-IG-A3QL-01;TCGA-IG-A3Y9-01;TCGA-IG-A3YA-01;TCGA-IG-A3YB-01;TCGA-IG-A4P3-01;TCGA-IG-A4QT-01;TCGA-IG-A50L-01;TCGA-IG-A625-01;TCGA-IG-A8O2-01;TCGA-IG-A97H-01;TCGA-IG-A97I-01;TCGA-JY-A6FA-01;TCGA-JY-A6FE-01;TCGA-JY-A6FG-01;TCGA-KH-A6WC-01;TCGA-L5-A43H-01;TCGA-L5-A4OM-01;TCGA-L5-A88S-01;TCGA-L5-A88Z-01;TCGA-L5-A8NK-01;TCGA-L5-A8NQ-01;TCGA-L7-A56G-01;TCGA-LN-A49L-01;TCGA-LN-A49M-01;TCGA-LN-A49N-01…	TCGA-IG-A3I8-01;TCGA-IG-A51D-01;TCGA-IG-A5B8-01;TCGA-IG-A5S3-01;TCGA-IG-A6QS-01;TCGA-JY-A6FD-01;TCGA-JY-A93F-01;TCGA-L5-A88W-01;TCGA-LN-A49K-01;TCGA-LN-A49V-01;TCGA-LN-A4A6-01;TCGA-LN-A4A8-01;TCGA-LN-A4A9-01;TCGA-LN-A7HZ-01;TCGA-LN-A9FQ-01;TCGA-V5-AASV-01;TCGA-VR-A8ER-01;TCGA-VR-A8EW-01;TCGA-VR-AA7B-01;TCGA-Z6-A8JE-01	no_validation_or_external_data_used
outer	6	1		METH_promoter_state	TCGA_Hallmark_METH_promoter_state_C01v1	z_score	outer_training_samples_only	outer_validation_samples	72	20	TCGA-IG-A3QL-01;TCGA-IG-A3Y9-01;TCGA-IG-A3YA-01;TCGA-IG-A3YB-01;TCGA-IG-A4P3-01;TCGA-IG-A4QT-01;TCGA-IG-A50L-01;TCGA-IG-A625-01;TCGA-IG-A8O2-01;TCGA-IG-A97H-01;TCGA-IG-A97I-01;TCGA-JY-A6FA-01;TCGA-JY-A6FE-01;TCGA-JY-A6FG-01;TCGA-KH-A6WC-01;TCGA-L5-A43H-01;TCGA-L5-A4OM-01;TCGA-L5-A88S-01;TCGA-L5-A88Z-01;TCGA-L5-A8NK-01;TCGA-L5-A8NQ-01;TCGA-L7-A56G-01;TCGA-LN-A49L-01;TCGA-LN-A49M-01;TCGA-LN-A49N-01…	TCGA-IG-A3I8-01;TCGA-IG-A51D-01;TCGA-IG-A5B8-01;TCGA-IG-A5S3-01;TCGA-IG-A6QS-01;TCGA-JY-A6FD-01;TCGA-JY-A93F-01;TCGA-L5-A88W-01;TCGA-LN-A49K-01;TCGA-LN-A49V-01;TCGA-LN-A4A6-01;TCGA-LN-A4A8-01;TCGA-LN-A4A9-01;TCGA-LN-A7HZ-01;TCGA-LN-A9FQ-01;TCGA-V5-AASV-01;TCGA-VR-A8ER-01;TCGA-VR-A8EW-01;TCGA-VR-AA7B-01;TCGA-Z6-A8JE-01	no_validation_or_external_data_used
outer	6	2		RNA_rank_activity	TCGA_Hallmark_RNA_rank_activity_C01v1	z_score	outer_training_samples_only	outer_validation_samples	74	18	TCGA-IG-A3I8-01;TCGA-IG-A3Y9-01;TCGA-IG-A3YA-01;TCGA-IG-A3YB-01;TCGA-IG-A51D-01;TCGA-IG-A5B8-01;TCGA-IG-A5S3-01;TCGA-IG-A6QS-01;TCGA-IG-A8O2-01;TCGA-IG-A97H-01;TCGA-IG-A97I-01;TCGA-JY-A6FD-01;TCGA-JY-A6FE-01;TCGA-JY-A6FG-01;TCGA-JY-A93F-01;TCGA-KH-A6WC-01;TCGA-L5-A43H-01;TCGA-L5-A4OM-01;TCGA-L5-A88S-01;TCGA-L5-A88W-01;TCGA-L5-A8NQ-01;TCGA-L7-A56G-01;TCGA-LN-A49K-01;TCGA-LN-A49L-01;TCGA-LN-A49M-01…	TCGA-IG-A3QL-01;TCGA-IG-A4P3-01;TCGA-IG-A4QT-01;TCGA-IG-A50L-01;TCGA-IG-A625-01;TCGA-JY-A6FA-01;TCGA-L5-A88Z-01;TCGA-L5-A8NK-01;TCGA-LN-A49S-01;TCGA-LN-A4A2-01;TCGA-LN-A4A4-01;TCGA-LN-A5U5-01;TCGA-LN-A5U7-01;TCGA-LN-A7HX-01;TCGA-LN-A8I0-01;TCGA-LN-A9FO-01;TCGA-VR-A8ET-01;TCGA-VR-A8EY-01	no_validation_or_external_data_used
outer	6	2		CNV_abs_burden	TCGA_Hallmark_CNV_abs_burden_C01v1	z_score	outer_training_samples_only	outer_validation_samples	74	18	TCGA-IG-A3I8-01;TCGA-IG-A3Y9-01;TCGA-IG-A3YA-01;TCGA-IG-A3YB-01;TCGA-IG-A51D-01;TCGA-IG-A5B8-01;TCGA-IG-A5S3-01;TCGA-IG-A6QS-01;TCGA-IG-A8O2-01;TCGA-IG-A97H-01;TCGA-IG-A97I-01;TCGA-JY-A6FD-01;TCGA-JY-A6FE-01;TCGA-JY-A6FG-01;TCGA-JY-A93F-01;TCGA-KH-A6WC-01;TCGA-L5-A43H-01;TCGA-L5-A4OM-01;TCGA-L5-A88S-01;TCGA-L5-A88W-01;TCGA-L5-A8NQ-01;TCGA-L7-A56G-01;TCGA-LN-A49K-01;TCGA-LN-A49L-01;TCGA-LN-A49M-01…	TCGA-IG-A3QL-01;TCGA-IG-A4P3-01;TCGA-IG-A4QT-01;TCGA-IG-A50L-01;TCGA-IG-A625-01;TCGA-JY-A6FA-01;TCGA-L5-A88Z-01;TCGA-L5-A8NK-01;TCGA-LN-A49S-01;TCGA-LN-A4A2-01;TCGA-LN-A4A4-01;TCGA-LN-A5U5-01;TCGA-LN-A5U7-01;TCGA-LN-A7HX-01;TCGA-LN-A8I0-01;TCGA-LN-A9FO-01;TCGA-VR-A8ET-01;TCGA-VR-A8EY-01	no_validation_or_external_data_used
outer	6	2		METH_promoter_state	TCGA_Hallmark_METH_promoter_state_C01v1	z_score	outer_training_samples_only	outer_validation_samples	74	18	TCGA-IG-A3I8-01;TCGA-IG-A3Y9-01;TCGA-IG-A3YA-01;TCGA-IG-A3YB-01;TCGA-IG-A51D-01;TCGA-IG-A5B8-01;TCGA-IG-A5S3-01;TCGA-IG-A6QS-01;TCGA-IG-A8O2-01;TCGA-IG-A97H-01;TCGA-IG-A97I-01;TCGA-JY-A6FD-01;TCGA-JY-A6FE-01;TCGA-JY-A6FG-01;TCGA-JY-A93F-01;TCGA-KH-A6WC-01;TCGA-L5-A43H-01;TCGA-L5-A4OM-01;TCGA-L5-A88S-01;TCGA-L5-A88W-01;TCGA-L5-A8NQ-01;TCGA-L7-A56G-01;TCGA-LN-A49K-01;TCGA-LN-A49L-01;TCGA-LN-A49M-01…	TCGA-IG-A3QL-01;TCGA-IG-A4P3-01;TCGA-IG-A4QT-01;TCGA-IG-A50L-01;TCGA-IG-A625-01;TCGA-JY-A6FA-01;TCGA-L5-A88Z-01;TCGA-L5-A8NK-01;TCGA-LN-A49S-01;TCGA-LN-A4A2-01;TCGA-LN-A4A4-01;TCGA-LN-A5U5-01;TCGA-LN-A5U7-01;TCGA-LN-A7HX-01;TCGA-LN-A8I0-01;TCGA-LN-A9FO-01;TCGA-VR-A8ET-01;TCGA-VR-A8EY-01	no_validation_or_external_data_used
outer	6	3		RNA_rank_activity	TCGA_Hallmark_RNA_rank_activity_C01v1	z_score	outer_training_samples_only	outer_validation_samples	74	18	TCGA-IG-A3I8-01;TCGA-IG-A3QL-01;TCGA-IG-A3YA-01;TCGA-IG-A4P3-01;TCGA-IG-A4QT-01;TCGA-IG-A50L-01;TCGA-IG-A51D-01;TCGA-IG-A5B8-01;TCGA-IG-A5S3-01;TCGA-IG-A625-01;TCGA-IG-A6QS-01;TCGA-IG-A8O2-01;TCGA-IG-A97I-01;TCGA-JY-A6FA-01;TCGA-JY-A6FD-01;TCGA-JY-A93F-01;TCGA-KH-A6WC-01;TCGA-L5-A4OM-01;TCGA-L5-A88W-01;TCGA-L5-A88Z-01;TCGA-L5-A8NK-01;TCGA-L7-A56G-01;TCGA-LN-A49K-01;TCGA-LN-A49L-01;TCGA-LN-A49M-01…	TCGA-IG-A3Y9-01;TCGA-IG-A3YB-01;TCGA-IG-A97H-01;TCGA-JY-A6FE-01;TCGA-JY-A6FG-01;TCGA-L5-A43H-01;TCGA-L5-A88S-01;TCGA-L5-A8NQ-01;TCGA-LN-A49P-01;TCGA-LN-A49Y-01;TCGA-LN-A7HW-01;TCGA-LN-A8HZ-01;TCGA-LN-A9FR-01;TCGA-S8-A6BW-01;TCGA-VR-A8EZ-01;TCGA-XP-A8T8-01;TCGA-Z6-A8JD-01;TCGA-Z6-A9VB-01	no_validation_or_external_data_used
outer	6	3		CNV_abs_burden	TCGA_Hallmark_CNV_abs_burden_C01v1	z_score	outer_training_samples_only	outer_validation_samples	74	18	TCGA-IG-A3I8-01;TCGA-IG-A3QL-01;TCGA-IG-A3YA-01;TCGA-IG-A4P3-01;TCGA-IG-A4QT-01;TCGA-IG-A50L-01;TCGA-IG-A51D-01;TCGA-IG-A5B8-01;TCGA-IG-A5S3-01;TCGA-IG-A625-01;TCGA-IG-A6QS-01;TCGA-IG-A8O2-01;TCGA-IG-A97I-01;TCGA-JY-A6FA-01;TCGA-JY-A6FD-01;TCGA-JY-A93F-01;TCGA-KH-A6WC-01;TCGA-L5-A4OM-01;TCGA-L5-A88W-01;TCGA-L5-A88Z-01;TCGA-L5-A8NK-01;TCGA-L7-A56G-01;TCGA-LN-A49K-01;TCGA-LN-A49L-01;TCGA-LN-A49M-01…	TCGA-IG-A3Y9-01;TCGA-IG-A3YB-01;TCGA-IG-A97H-01;TCGA-JY-A6FE-01;TCGA-JY-A6FG-01;TCGA-L5-A43H-01;TCGA-L5-A88S-01;TCGA-L5-A8NQ-01;TCGA-LN-A49P-01;TCGA-LN-A49Y-01;TCGA-LN-A7HW-01;TCGA-LN-A8HZ-01;TCGA-LN-A9FR-01;TCGA-S8-A6BW-01;TCGA-VR-A8EZ-01;TCGA-XP-A8T8-01;TCGA-Z6-A8JD-01;TCGA-Z6-A9VB-01	no_validation_or_external_data_used
outer	6	3		METH_promoter_state	TCGA_Hallmark_METH_promoter_state_C01v1	z_score	outer_training_samples_only	outer_validation_samples	74	18	TCGA-IG-A3I8-01;TCGA-IG-A3QL-01;TCGA-IG-A3YA-01;TCGA-IG-A4P3-01;TCGA-IG-A4QT-01;TCGA-IG-A50L-01;TCGA-IG-A51D-01;TCGA-IG-A5B8-01;TCGA-IG-A5S3-01;TCGA-IG-A625-01;TCGA-IG-A6QS-01;TCGA-IG-A8O2-01;TCGA-IG-A97I-01;TCGA-JY-A6FA-01;TCGA-JY-A6FD-01;TCGA-JY-A93F-01;TCGA-KH-A6WC-01;TCGA-L5-A4OM-01;TCGA-L5-A88W-01;TCGA-L5-A88Z-01;TCGA-L5-A8NK-01;TCGA-L7-A56G-01;TCGA-LN-A49K-01;TCGA-LN-A49L-01;TCGA-LN-A49M-01…	TCGA-IG-A3Y9-01;TCGA-IG-A3YB-01;TCGA-IG-A97H-01;TCGA-JY-A6FE-01;TCGA-JY-A6FG-01;TCGA-L5-A43H-01;TCGA-L5-A88S-01;TCGA-L5-A8NQ-01;TCGA-LN-A49P-01;TCGA-LN-A49Y-01;TCGA-LN-A7HW-01;TCGA-LN-A8HZ-01;TCGA-LN-A9FR-01;TCGA-S8-A6BW-01;TCGA-VR-A8EZ-01;TCGA-XP-A8T8-01;TCGA-Z6-A8JD-01;TCGA-Z6-A9VB-01	no_validation_or_external_data_used
outer	6	4		RNA_rank_activity	TCGA_Hallmark_RNA_rank_activity_C01v1	z_score	outer_training_samples_only	outer_validation_samples	74	18	TCGA-IG-A3I8-01;TCGA-IG-A3QL-01;TCGA-IG-A3Y9-01;TCGA-IG-A3YA-01;TCGA-IG-A3YB-01;TCGA-IG-A4P3-01;TCGA-IG-A4QT-01;TCGA-IG-A50L-01;TCGA-IG-A51D-01;TCGA-IG-A5B8-01;TCGA-IG-A5S3-01;TCGA-IG-A625-01;TCGA-IG-A6QS-01;TCGA-IG-A8O2-01;TCGA-IG-A97H-01;TCGA-IG-A97I-01;TCGA-JY-A6FA-01;TCGA-JY-A6FD-01;TCGA-JY-A6FE-01;TCGA-JY-A6FG-01;TCGA-JY-A93F-01;TCGA-L5-A43H-01;TCGA-L5-A4OM-01;TCGA-L5-A88S-01;TCGA-L5-A88W-01…	TCGA-KH-A6WC-01;TCGA-LN-A49L-01;TCGA-LN-A49M-01;TCGA-LN-A49U-01;TCGA-LN-A4A3-01;TCGA-LN-A4MQ-01;TCGA-LN-A4MR-01;TCGA-LN-A7HV-01;TCGA-Q9-A6FU-01;TCGA-VR-A8EO-01;TCGA-VR-A8EP-01;TCGA-VR-A8EU-01;TCGA-VR-A8EX-01;TCGA-VR-A8Q7-01;TCGA-VR-AA4G-01;TCGA-VR-AA7D-01;TCGA-VR-AA7I-01;TCGA-Z6-AAPN-01	no_validation_or_external_data_used
outer	6	4		CNV_abs_burden	TCGA_Hallmark_CNV_abs_burden_C01v1	z_score	outer_training_samples_only	outer_validation_samples	74	18	TCGA-IG-A3I8-01;TCGA-IG-A3QL-01;TCGA-IG-A3Y9-01;TCGA-IG-A3YA-01;TCGA-IG-A3YB-01;TCGA-IG-A4P3-01;TCGA-IG-A4QT-01;TCGA-IG-A50L-01;TCGA-IG-A51D-01;TCGA-IG-A5B8-01;TCGA-IG-A5S3-01;TCGA-IG-A625-01;TCGA-IG-A6QS-01;TCGA-IG-A8O2-01;TCGA-IG-A97H-01;TCGA-IG-A97I-01;TCGA-JY-A6FA-01;TCGA-JY-A6FD-01;TCGA-JY-A6FE-01;TCGA-JY-A6FG-01;TCGA-JY-A93F-01;TCGA-L5-A43H-01;TCGA-L5-A4OM-01;TCGA-L5-A88S-01;TCGA-L5-A88W-01…	TCGA-KH-A6WC-01;TCGA-LN-A49L-01;TCGA-LN-A49M-01;TCGA-LN-A49U-01;TCGA-LN-A4A3-01;TCGA-LN-A4MQ-01;TCGA-LN-A4MR-01;TCGA-LN-A7HV-01;TCGA-Q9-A6FU-01;TCGA-VR-A8EO-01;TCGA-VR-A8EP-01;TCGA-VR-A8EU-01;TCGA-VR-A8EX-01;TCGA-VR-A8Q7-01;TCGA-VR-AA4G-01;TCGA-VR-AA7D-01;TCGA-VR-AA7I-01;TCGA-Z6-AAPN-01	no_validation_or_external_data_used
outer	6	4		METH_promoter_state	TCGA_Hallmark_METH_promoter_state_C01v1	z_score	outer_training_samples_only	outer_validation_samples	74	18	TCGA-IG-A3I8-01;TCGA-IG-A3QL-01;TCGA-IG-A3Y9-01;TCGA-IG-A3YA-01;TCGA-IG-A3YB-01;TCGA-IG-A4P3-01;TCGA-IG-A4QT-01;TCGA-IG-A50L-01;TCGA-IG-A51D-01;TCGA-IG-A5B8-01;TCGA-IG-A5S3-01;TCGA-IG-A625-01;TCGA-IG-A6QS-01;TCGA-IG-A8O2-01;TCGA-IG-A97H-01;TCGA-IG-A97I-01;TCGA-JY-A6FA-01;TCGA-JY-A6FD-01;TCGA-JY-A6FE-01;TCGA-JY-A6FG-01;TCGA-JY-A93F-01;TCGA-L5-A43H-01;TCGA-L5-A4OM-01;TCGA-L5-A88S-01;TCGA-L5-A88W-01…	TCGA-KH-A6WC-01;TCGA-LN-A49L-01;TCGA-LN-A49M-01;TCGA-LN-A49U-01;TCGA-LN-A4A3-01;TCGA-LN-A4MQ-01;TCGA-LN-A4MR-01;TCGA-LN-A7HV-01;TCGA-Q9-A6FU-01;TCGA-VR-A8EO-01;TCGA-VR-A8EP-01;TCGA-VR-A8EU-01;TCGA-VR-A8EX-01;TCGA-VR-A8Q7-01;TCGA-VR-AA4G-01;TCGA-VR-AA7D-01;TCGA-VR-AA7I-01;TCGA-Z6-AAPN-01	no_validation_or_external_data_used
outer	6	5		RNA_rank_activity	TCGA_Hallmark_RNA_rank_activity_C01v1	z_score	outer_training_samples_only	outer_validation_samples	74	18	TCGA-IG-A3I8-01;TCGA-IG-A3QL-01;TCGA-IG-A3Y9-01;TCGA-IG-A3YB-01;TCGA-IG-A4P3-01;TCGA-IG-A4QT-01;TCGA-IG-A50L-01;TCGA-IG-A51D-01;TCGA-IG-A5B8-01;TCGA-IG-A5S3-01;TCGA-IG-A625-01;TCGA-IG-A6QS-01;TCGA-IG-A97H-01;TCGA-JY-A6FA-01;TCGA-JY-A6FD-01;TCGA-JY-A6FE-01;TCGA-JY-A6FG-01;TCGA-JY-A93F-01;TCGA-KH-A6WC-01;TCGA-L5-A43H-01;TCGA-L5-A88S-01;TCGA-L5-A88W-01;TCGA-L5-A88Z-01;TCGA-L5-A8NK-01;TCGA-L5-A8NQ-01…	TCGA-IG-A3YA-01;TCGA-IG-A8O2-01;TCGA-IG-A97I-01;TCGA-L5-A4OM-01;TCGA-L7-A56G-01;TCGA-LN-A49N-01;TCGA-LN-A49O-01;TCGA-LN-A49R-01;TCGA-LN-A49W-01;TCGA-LN-A49X-01;TCGA-LN-A4A1-01;TCGA-LN-A4A5-01;TCGA-LN-A5U6-01;TCGA-LN-A7HY-01;TCGA-LN-A8I1-01;TCGA-LN-A9FP-01;TCGA-V5-A7RC-01;TCGA-XP-A8T6-01	no_validation_or_external_data_used
outer	6	5		CNV_abs_burden	TCGA_Hallmark_CNV_abs_burden_C01v1	z_score	outer_training_samples_only	outer_validation_samples	74	18	TCGA-IG-A3I8-01;TCGA-IG-A3QL-01;TCGA-IG-A3Y9-01;TCGA-IG-A3YB-01;TCGA-IG-A4P3-01;TCGA-IG-A4QT-01;TCGA-IG-A50L-01;TCGA-IG-A51D-01;TCGA-IG-A5B8-01;TCGA-IG-A5S3-01;TCGA-IG-A625-01;TCGA-IG-A6QS-01;TCGA-IG-A97H-01;TCGA-JY-A6FA-01;TCGA-JY-A6FD-01;TCGA-JY-A6FE-01;TCGA-JY-A6FG-01;TCGA-JY-A93F-01;TCGA-KH-A6WC-01;TCGA-L5-A43H-01;TCGA-L5-A88S-01;TCGA-L5-A88W-01;TCGA-L5-A88Z-01;TCGA-L5-A8NK-01;TCGA-L5-A8NQ-01…	TCGA-IG-A3YA-01;TCGA-IG-A8O2-01;TCGA-IG-A97I-01;TCGA-L5-A4OM-01;TCGA-L7-A56G-01;TCGA-LN-A49N-01;TCGA-LN-A49O-01;TCGA-LN-A49R-01;TCGA-LN-A49W-01;TCGA-LN-A49X-01;TCGA-LN-A4A1-01;TCGA-LN-A4A5-01;TCGA-LN-A5U6-01;TCGA-LN-A7HY-01;TCGA-LN-A8I1-01;TCGA-LN-A9FP-01;TCGA-V5-A7RC-01;TCGA-XP-A8T6-01	no_validation_or_external_data_used
outer	6	5		METH_promoter_state	TCGA_Hallmark_METH_promoter_state_C01v1	z_score	outer_training_samples_only	outer_validation_samples	74	18	TCGA-IG-A3I8-01;TCGA-IG-A3QL-01;TCGA-IG-A3Y9-01;TCGA-IG-A3YB-01;TCGA-IG-A4P3-01;TCGA-IG-A4QT-01;TCGA-IG-A50L-01;TCGA-IG-A51D-01;TCGA-IG-A5B8-01;TCGA-IG-A5S3-01;TCGA-IG-A625-01;TCGA-IG-A6QS-01;TCGA-IG-A97H-01;TCGA-JY-A6FA-01;TCGA-JY-A6FD-01;TCGA-JY-A6FE-01;TCGA-JY-A6FG-01;TCGA-JY-A93F-01;TCGA-KH-A6WC-01;TCGA-L5-A43H-01;TCGA-L5-A88S-01;TCGA-L5-A88W-01;TCGA-L5-A88Z-01;TCGA-L5-A8NK-01;TCGA-L5-A8NQ-01…	TCGA-IG-A3YA-01;TCGA-IG-A8O2-01;TCGA-IG-A97I-01;TCGA-L5-A4OM-01;TCGA-L7-A56G-01;TCGA-LN-A49N-01;TCGA-LN-A49O-01;TCGA-LN-A49R-01;TCGA-LN-A49W-01;TCGA-LN-A49X-01;TCGA-LN-A4A1-01;TCGA-LN-A4A5-01;TCGA-LN-A5U6-01;TCGA-LN-A7HY-01;TCGA-LN-A8I1-01;TCGA-LN-A9FP-01;TCGA-V5-A7RC-01;TCGA-XP-A8T6-01	no_validation_or_external_data_used
outer	7	1		RNA_rank_activity	TCGA_Hallmark_RNA_rank_activity_C01v1	z_score	outer_training_samples_only	outer_validation_samples	72	20	TCGA-IG-A3I8-01;TCGA-IG-A3QL-01;TCGA-IG-A3Y9-01;TCGA-IG-A3YA-01;TCGA-IG-A4P3-01;TCGA-IG-A51D-01;TCGA-IG-A5B8-01;TCGA-IG-A5S3-01;TCGA-IG-A625-01;TCGA-IG-A6QS-01;TCGA-IG-A8O2-01;TCGA-IG-A97H-01;TCGA-IG-A97I-01;TCGA-JY-A6FA-01;TCGA-JY-A6FD-01;TCGA-JY-A6FE-01;TCGA-JY-A6FG-01;TCGA-JY-A93F-01;TCGA-KH-A6WC-01;TCGA-L5-A88S-01;TCGA-L5-A88W-01;TCGA-L5-A88Z-01;TCGA-L5-A8NQ-01;TCGA-L7-A56G-01;TCGA-LN-A49K-01…	TCGA-IG-A3YB-01;TCGA-IG-A4QT-01;TCGA-IG-A50L-01;TCGA-L5-A43H-01;TCGA-L5-A4OM-01;TCGA-L5-A8NK-01;TCGA-LN-A49R-01;TCGA-LN-A49Y-01;TCGA-LN-A4A9-01;TCGA-LN-A4MR-01;TCGA-LN-A5U5-01;TCGA-LN-A5U6-01;TCGA-LN-A7HY-01;TCGA-LN-A8HZ-01;TCGA-S8-A6BW-01;TCGA-VR-A8Q7-01;TCGA-VR-AA4G-01;TCGA-VR-AA7D-01;TCGA-XP-A8T6-01;TCGA-Z6-A8JE-01	no_validation_or_external_data_used
outer	7	1		CNV_abs_burden	TCGA_Hallmark_CNV_abs_burden_C01v1	z_score	outer_training_samples_only	outer_validation_samples	72	20	TCGA-IG-A3I8-01;TCGA-IG-A3QL-01;TCGA-IG-A3Y9-01;TCGA-IG-A3YA-01;TCGA-IG-A4P3-01;TCGA-IG-A51D-01;TCGA-IG-A5B8-01;TCGA-IG-A5S3-01;TCGA-IG-A625-01;TCGA-IG-A6QS-01;TCGA-IG-A8O2-01;TCGA-IG-A97H-01;TCGA-IG-A97I-01;TCGA-JY-A6FA-01;TCGA-JY-A6FD-01;TCGA-JY-A6FE-01;TCGA-JY-A6FG-01;TCGA-JY-A93F-01;TCGA-KH-A6WC-01;TCGA-L5-A88S-01;TCGA-L5-A88W-01;TCGA-L5-A88Z-01;TCGA-L5-A8NQ-01;TCGA-L7-A56G-01;TCGA-LN-A49K-01…	TCGA-IG-A3YB-01;TCGA-IG-A4QT-01;TCGA-IG-A50L-01;TCGA-L5-A43H-01;TCGA-L5-A4OM-01;TCGA-L5-A8NK-01;TCGA-LN-A49R-01;TCGA-LN-A49Y-01;TCGA-LN-A4A9-01;TCGA-LN-A4MR-01;TCGA-LN-A5U5-01;TCGA-LN-A5U6-01;TCGA-LN-A7HY-01;TCGA-LN-A8HZ-01;TCGA-S8-A6BW-01;TCGA-VR-A8Q7-01;TCGA-VR-AA4G-01;TCGA-VR-AA7D-01;TCGA-XP-A8T6-01;TCGA-Z6-A8JE-01	no_validation_or_external_data_used
outer	7	1		METH_promoter_state	TCGA_Hallmark_METH_promoter_state_C01v1	z_score	outer_training_samples_only	outer_validation_samples	72	20	TCGA-IG-A3I8-01;TCGA-IG-A3QL-01;TCGA-IG-A3Y9-01;TCGA-IG-A3YA-01;TCGA-IG-A4P3-01;TCGA-IG-A51D-01;TCGA-IG-A5B8-01;TCGA-IG-A5S3-01;TCGA-IG-A625-01;TCGA-IG-A6QS-01;TCGA-IG-A8O2-01;TCGA-IG-A97H-01;TCGA-IG-A97I-01;TCGA-JY-A6FA-01;TCGA-JY-A6FD-01;TCGA-JY-A6FE-01;TCGA-JY-A6FG-01;TCGA-JY-A93F-01;TCGA-KH-A6WC-01;TCGA-L5-A88S-01;TCGA-L5-A88W-01;TCGA-L5-A88Z-01;TCGA-L5-A8NQ-01;TCGA-L7-A56G-01;TCGA-LN-A49K-01…	TCGA-IG-A3YB-01;TCGA-IG-A4QT-01;TCGA-IG-A50L-01;TCGA-L5-A43H-01;TCGA-L5-A4OM-01;TCGA-L5-A8NK-01;TCGA-LN-A49R-01;TCGA-LN-A49Y-01;TCGA-LN-A4A9-01;TCGA-LN-A4MR-01;TCGA-LN-A5U5-01;TCGA-LN-A5U6-01;TCGA-LN-A7HY-01;TCGA-LN-A8HZ-01;TCGA-S8-A6BW-01;TCGA-VR-A8Q7-01;TCGA-VR-AA4G-01;TCGA-VR-AA7D-01;TCGA-XP-A8T6-01;TCGA-Z6-A8JE-01	no_validation_or_external_data_used
outer	7	2		RNA_rank_activity	TCGA_Hallmark_RNA_rank_activity_C01v1	z_score	outer_training_samples_only	outer_validation_samples	74	18	TCGA-IG-A3I8-01;TCGA-IG-A3QL-01;TCGA-IG-A3Y9-01;TCGA-IG-A3YA-01;TCGA-IG-A3YB-01;TCGA-IG-A4P3-01;TCGA-IG-A4QT-01;TCGA-IG-A50L-01;TCGA-IG-A51D-01;TCGA-IG-A5B8-01;TCGA-IG-A5S3-01;TCGA-IG-A6QS-01;TCGA-IG-A8O2-01;TCGA-IG-A97H-01;TCGA-JY-A6FA-01;TCGA-JY-A6FD-01;TCGA-JY-A6FE-01;TCGA-JY-A93F-01;TCGA-KH-A6WC-01;TCGA-L5-A43H-01;TCGA-L5-A4OM-01;TCGA-L5-A88S-01;TCGA-L5-A88Z-01;TCGA-L5-A8NK-01;TCGA-LN-A49K-01…	TCGA-IG-A625-01;TCGA-IG-A97I-01;TCGA-JY-A6FG-01;TCGA-L5-A88W-01;TCGA-L5-A8NQ-01;TCGA-L7-A56G-01;TCGA-LN-A49L-01;TCGA-LN-A49M-01;TCGA-LN-A49P-01;TCGA-LN-A49W-01;TCGA-LN-A4A1-01;TCGA-LN-A4A4-01;TCGA-LN-A4MQ-01;TCGA-LN-A5U7-01;TCGA-LN-A7HX-01;TCGA-LN-A8I1-01;TCGA-VR-AA7B-01;TCGA-Z6-A9VB-01	no_validation_or_external_data_used
outer	7	2		CNV_abs_burden	TCGA_Hallmark_CNV_abs_burden_C01v1	z_score	outer_training_samples_only	outer_validation_samples	74	18	TCGA-IG-A3I8-01;TCGA-IG-A3QL-01;TCGA-IG-A3Y9-01;TCGA-IG-A3YA-01;TCGA-IG-A3YB-01;TCGA-IG-A4P3-01;TCGA-IG-A4QT-01;TCGA-IG-A50L-01;TCGA-IG-A51D-01;TCGA-IG-A5B8-01;TCGA-IG-A5S3-01;TCGA-IG-A6QS-01;TCGA-IG-A8O2-01;TCGA-IG-A97H-01;TCGA-JY-A6FA-01;TCGA-JY-A6FD-01;TCGA-JY-A6FE-01;TCGA-JY-A93F-01;TCGA-KH-A6WC-01;TCGA-L5-A43H-01;TCGA-L5-A4OM-01;TCGA-L5-A88S-01;TCGA-L5-A88Z-01;TCGA-L5-A8NK-01;TCGA-LN-A49K-01…	TCGA-IG-A625-01;TCGA-IG-A97I-01;TCGA-JY-A6FG-01;TCGA-L5-A88W-01;TCGA-L5-A8NQ-01;TCGA-L7-A56G-01;TCGA-LN-A49L-01;TCGA-LN-A49M-01;TCGA-LN-A49P-01;TCGA-LN-A49W-01;TCGA-LN-A4A1-01;TCGA-LN-A4A4-01;TCGA-LN-A4MQ-01;TCGA-LN-A5U7-01;TCGA-LN-A7HX-01;TCGA-LN-A8I1-01;TCGA-VR-AA7B-01;TCGA-Z6-A9VB-01	no_validation_or_external_data_used
outer	7	2		METH_promoter_state	TCGA_Hallmark_METH_promoter_state_C01v1	z_score	outer_training_samples_only	outer_validation_samples	74	18	TCGA-IG-A3I8-01;TCGA-IG-A3QL-01;TCGA-IG-A3Y9-01;TCGA-IG-A3YA-01;TCGA-IG-A3YB-01;TCGA-IG-A4P3-01;TCGA-IG-A4QT-01;TCGA-IG-A50L-01;TCGA-IG-A51D-01;TCGA-IG-A5B8-01;TCGA-IG-A5S3-01;TCGA-IG-A6QS-01;TCGA-IG-A8O2-01;TCGA-IG-A97H-01;TCGA-JY-A6FA-01;TCGA-JY-A6FD-01;TCGA-JY-A6FE-01;TCGA-JY-A93F-01;TCGA-KH-A6WC-01;TCGA-L5-A43H-01;TCGA-L5-A4OM-01;TCGA-L5-A88S-01;TCGA-L5-A88Z-01;TCGA-L5-A8NK-01;TCGA-LN-A49K-01…	TCGA-IG-A625-01;TCGA-IG-A97I-01;TCGA-JY-A6FG-01;TCGA-L5-A88W-01;TCGA-L5-A8NQ-01;TCGA-L7-A56G-01;TCGA-LN-A49L-01;TCGA-LN-A49M-01;TCGA-LN-A49P-01;TCGA-LN-A49W-01;TCGA-LN-A4A1-01;TCGA-LN-A4A4-01;TCGA-LN-A4MQ-01;TCGA-LN-A5U7-01;TCGA-LN-A7HX-01;TCGA-LN-A8I1-01;TCGA-VR-AA7B-01;TCGA-Z6-A9VB-01	no_validation_or_external_data_used
outer	7	3		RNA_rank_activity	TCGA_Hallmark_RNA_rank_activity_C01v1	z_score	outer_training_samples_only	outer_validation_samples	74	18	TCGA-IG-A3QL-01;TCGA-IG-A3YB-01;TCGA-IG-A4P3-01;TCGA-IG-A4QT-01;TCGA-IG-A50L-01;TCGA-IG-A5B8-01;TCGA-IG-A625-01;TCGA-IG-A8O2-01;TCGA-IG-A97I-01;TCGA-JY-A6FA-01;TCGA-JY-A6FE-01;TCGA-JY-A6FG-01;TCGA-JY-A93F-01;TCGA-KH-A6WC-01;TCGA-L5-A43H-01;TCGA-L5-A4OM-01;TCGA-L5-A88S-01;TCGA-L5-A88W-01;TCGA-L5-A88Z-01;TCGA-L5-A8NK-01;TCGA-L5-A8NQ-01;TCGA-L7-A56G-01;TCGA-LN-A49K-01;TCGA-LN-A49L-01;TCGA-LN-A49M-01…	TCGA-IG-A3I8-01;TCGA-IG-A3Y9-01;TCGA-IG-A3YA-01;TCGA-IG-A51D-01;TCGA-IG-A5S3-01;TCGA-IG-A6QS-01;TCGA-IG-A97H-01;TCGA-JY-A6FD-01;TCGA-LN-A49N-01;TCGA-LN-A4A2-01;TCGA-LN-A4A3-01;TCGA-LN-A4A5-01;TCGA-LN-A9FP-01;TCGA-VR-A8EP-01;TCGA-VR-A8ET-01;TCGA-VR-A8EU-01;TCGA-VR-A8EX-01;TCGA-Z6-A8JD-01	no_validation_or_external_data_used
outer	7	3		CNV_abs_burden	TCGA_Hallmark_CNV_abs_burden_C01v1	z_score	outer_training_samples_only	outer_validation_samples	74	18	TCGA-IG-A3QL-01;TCGA-IG-A3YB-01;TCGA-IG-A4P3-01;TCGA-IG-A4QT-01;TCGA-IG-A50L-01;TCGA-IG-A5B8-01;TCGA-IG-A625-01;TCGA-IG-A8O2-01;TCGA-IG-A97I-01;TCGA-JY-A6FA-01;TCGA-JY-A6FE-01;TCGA-JY-A6FG-01;TCGA-JY-A93F-01;TCGA-KH-A6WC-01;TCGA-L5-A43H-01;TCGA-L5-A4OM-01;TCGA-L5-A88S-01;TCGA-L5-A88W-01;TCGA-L5-A88Z-01;TCGA-L5-A8NK-01;TCGA-L5-A8NQ-01;TCGA-L7-A56G-01;TCGA-LN-A49K-01;TCGA-LN-A49L-01;TCGA-LN-A49M-01…	TCGA-IG-A3I8-01;TCGA-IG-A3Y9-01;TCGA-IG-A3YA-01;TCGA-IG-A51D-01;TCGA-IG-A5S3-01;TCGA-IG-A6QS-01;TCGA-IG-A97H-01;TCGA-JY-A6FD-01;TCGA-LN-A49N-01;TCGA-LN-A4A2-01;TCGA-LN-A4A3-01;TCGA-LN-A4A5-01;TCGA-LN-A9FP-01;TCGA-VR-A8EP-01;TCGA-VR-A8ET-01;TCGA-VR-A8EU-01;TCGA-VR-A8EX-01;TCGA-Z6-A8JD-01	no_validation_or_external_data_used
outer	7	3		METH_promoter_state	TCGA_Hallmark_METH_promoter_state_C01v1	z_score	outer_training_samples_only	outer_validation_samples	74	18	TCGA-IG-A3QL-01;TCGA-IG-A3YB-01;TCGA-IG-A4P3-01;TCGA-IG-A4QT-01;TCGA-IG-A50L-01;TCGA-IG-A5B8-01;TCGA-IG-A625-01;TCGA-IG-A8O2-01;TCGA-IG-A97I-01;TCGA-JY-A6FA-01;TCGA-JY-A6FE-01;TCGA-JY-A6FG-01;TCGA-JY-A93F-01;TCGA-KH-A6WC-01;TCGA-L5-A43H-01;TCGA-L5-A4OM-01;TCGA-L5-A88S-01;TCGA-L5-A88W-01;TCGA-L5-A88Z-01;TCGA-L5-A8NK-01;TCGA-L5-A8NQ-01;TCGA-L7-A56G-01;TCGA-LN-A49K-01;TCGA-LN-A49L-01;TCGA-LN-A49M-01…	TCGA-IG-A3I8-01;TCGA-IG-A3Y9-01;TCGA-IG-A3YA-01;TCGA-IG-A51D-01;TCGA-IG-A5S3-01;TCGA-IG-A6QS-01;TCGA-IG-A97H-01;TCGA-JY-A6FD-01;TCGA-LN-A49N-01;TCGA-LN-A4A2-01;TCGA-LN-A4A3-01;TCGA-LN-A4A5-01;TCGA-LN-A9FP-01;TCGA-VR-A8EP-01;TCGA-VR-A8ET-01;TCGA-VR-A8EU-01;TCGA-VR-A8EX-01;TCGA-Z6-A8JD-01	no_validation_or_external_data_used
outer	7	4		RNA_rank_activity	TCGA_Hallmark_RNA_rank_activity_C01v1	z_score	outer_training_samples_only	outer_validation_samples	74	18	TCGA-IG-A3I8-01;TCGA-IG-A3Y9-01;TCGA-IG-A3YA-01;TCGA-IG-A3YB-01;TCGA-IG-A4QT-01;TCGA-IG-A50L-01;TCGA-IG-A51D-01;TCGA-IG-A5S3-01;TCGA-IG-A625-01;TCGA-IG-A6QS-01;TCGA-IG-A8O2-01;TCGA-IG-A97H-01;TCGA-IG-A97I-01;TCGA-JY-A6FD-01;TCGA-JY-A6FE-01;TCGA-JY-A6FG-01;TCGA-L5-A43H-01;TCGA-L5-A4OM-01;TCGA-L5-A88S-01;TCGA-L5-A88W-01;TCGA-L5-A88Z-01;TCGA-L5-A8NK-01;TCGA-L5-A8NQ-01;TCGA-L7-A56G-01;TCGA-LN-A49K-01…	TCGA-IG-A3QL-01;TCGA-IG-A4P3-01;TCGA-IG-A5B8-01;TCGA-JY-A6FA-01;TCGA-JY-A93F-01;TCGA-KH-A6WC-01;TCGA-LN-A49S-01;TCGA-LN-A49X-01;TCGA-LN-A4A6-01;TCGA-LN-A7HW-01;TCGA-LN-A7HZ-01;TCGA-LN-A9FO-01;TCGA-LN-A9FR-01;TCGA-Q9-A6FU-01;TCGA-VR-A8EO-01;TCGA-VR-A8EW-01;TCGA-VR-AA7I-01;TCGA-XP-A8T8-01	no_validation_or_external_data_used
outer	7	4		CNV_abs_burden	TCGA_Hallmark_CNV_abs_burden_C01v1	z_score	outer_training_samples_only	outer_validation_samples	74	18	TCGA-IG-A3I8-01;TCGA-IG-A3Y9-01;TCGA-IG-A3YA-01;TCGA-IG-A3YB-01;TCGA-IG-A4QT-01;TCGA-IG-A50L-01;TCGA-IG-A51D-01;TCGA-IG-A5S3-01;TCGA-IG-A625-01;TCGA-IG-A6QS-01;TCGA-IG-A8O2-01;TCGA-IG-A97H-01;TCGA-IG-A97I-01;TCGA-JY-A6FD-01;TCGA-JY-A6FE-01;TCGA-JY-A6FG-01;TCGA-L5-A43H-01;TCGA-L5-A4OM-01;TCGA-L5-A88S-01;TCGA-L5-A88W-01;TCGA-L5-A88Z-01;TCGA-L5-A8NK-01;TCGA-L5-A8NQ-01;TCGA-L7-A56G-01;TCGA-LN-A49K-01…	TCGA-IG-A3QL-01;TCGA-IG-A4P3-01;TCGA-IG-A5B8-01;TCGA-JY-A6FA-01;TCGA-JY-A93F-01;TCGA-KH-A6WC-01;TCGA-LN-A49S-01;TCGA-LN-A49X-01;TCGA-LN-A4A6-01;TCGA-LN-A7HW-01;TCGA-LN-A7HZ-01;TCGA-LN-A9FO-01;TCGA-LN-A9FR-01;TCGA-Q9-A6FU-01;TCGA-VR-A8EO-01;TCGA-VR-A8EW-01;TCGA-VR-AA7I-01;TCGA-XP-A8T8-01	no_validation_or_external_data_used
outer	7	4		METH_promoter_state	TCGA_Hallmark_METH_promoter_state_C01v1	z_score	outer_training_samples_only	outer_validation_samples	74	18	TCGA-IG-A3I8-01;TCGA-IG-A3Y9-01;TCGA-IG-A3YA-01;TCGA-IG-A3YB-01;TCGA-IG-A4QT-01;TCGA-IG-A50L-01;TCGA-IG-A51D-01;TCGA-IG-A5S3-01;TCGA-IG-A625-01;TCGA-IG-A6QS-01;TCGA-IG-A8O2-01;TCGA-IG-A97H-01;TCGA-IG-A97I-01;TCGA-JY-A6FD-01;TCGA-JY-A6FE-01;TCGA-JY-A6FG-01;TCGA-L5-A43H-01;TCGA-L5-A4OM-01;TCGA-L5-A88S-01;TCGA-L5-A88W-01;TCGA-L5-A88Z-01;TCGA-L5-A8NK-01;TCGA-L5-A8NQ-01;TCGA-L7-A56G-01;TCGA-LN-A49K-01…	TCGA-IG-A3QL-01;TCGA-IG-A4P3-01;TCGA-IG-A5B8-01;TCGA-JY-A6FA-01;TCGA-JY-A93F-01;TCGA-KH-A6WC-01;TCGA-LN-A49S-01;TCGA-LN-A49X-01;TCGA-LN-A4A6-01;TCGA-LN-A7HW-01;TCGA-LN-A7HZ-01;TCGA-LN-A9FO-01;TCGA-LN-A9FR-01;TCGA-Q9-A6FU-01;TCGA-VR-A8EO-01;TCGA-VR-A8EW-01;TCGA-VR-AA7I-01;TCGA-XP-A8T8-01	no_validation_or_external_data_used
outer	7	5		RNA_rank_activity	TCGA_Hallmark_RNA_rank_activity_C01v1	z_score	outer_training_samples_only	outer_validation_samples	74	18	TCGA-IG-A3I8-01;TCGA-IG-A3QL-01;TCGA-IG-A3Y9-01;TCGA-IG-A3YA-01;TCGA-IG-A3YB-01;TCGA-IG-A4P3-01;TCGA-IG-A4QT-01;TCGA-IG-A50L-01;TCGA-IG-A51D-01;TCGA-IG-A5B8-01;TCGA-IG-A5S3-01;TCGA-IG-A625-01;TCGA-IG-A6QS-01;TCGA-IG-A97H-01;TCGA-IG-A97I-01;TCGA-JY-A6FA-01;TCGA-JY-A6FD-01;TCGA-JY-A6FG-01;TCGA-JY-A93F-01;TCGA-KH-A6WC-01;TCGA-L5-A43H-01;TCGA-L5-A4OM-01;TCGA-L5-A88W-01;TCGA-L5-A8NK-01;TCGA-L5-A8NQ-01…	TCGA-IG-A8O2-01;TCGA-JY-A6FE-01;TCGA-L5-A88S-01;TCGA-L5-A88Z-01;TCGA-LN-A49K-01;TCGA-LN-A49O-01;TCGA-LN-A49U-01;TCGA-LN-A49V-01;TCGA-LN-A4A8-01;TCGA-LN-A7HV-01;TCGA-LN-A8I0-01;TCGA-LN-A9FQ-01;TCGA-V5-A7RC-01;TCGA-V5-AASV-01;TCGA-VR-A8ER-01;TCGA-VR-A8EY-01;TCGA-VR-A8EZ-01;TCGA-Z6-AAPN-01	no_validation_or_external_data_used
outer	7	5		CNV_abs_burden	TCGA_Hallmark_CNV_abs_burden_C01v1	z_score	outer_training_samples_only	outer_validation_samples	74	18	TCGA-IG-A3I8-01;TCGA-IG-A3QL-01;TCGA-IG-A3Y9-01;TCGA-IG-A3YA-01;TCGA-IG-A3YB-01;TCGA-IG-A4P3-01;TCGA-IG-A4QT-01;TCGA-IG-A50L-01;TCGA-IG-A51D-01;TCGA-IG-A5B8-01;TCGA-IG-A5S3-01;TCGA-IG-A625-01;TCGA-IG-A6QS-01;TCGA-IG-A97H-01;TCGA-IG-A97I-01;TCGA-JY-A6FA-01;TCGA-JY-A6FD-01;TCGA-JY-A6FG-01;TCGA-JY-A93F-01;TCGA-KH-A6WC-01;TCGA-L5-A43H-01;TCGA-L5-A4OM-01;TCGA-L5-A88W-01;TCGA-L5-A8NK-01;TCGA-L5-A8NQ-01…	TCGA-IG-A8O2-01;TCGA-JY-A6FE-01;TCGA-L5-A88S-01;TCGA-L5-A88Z-01;TCGA-LN-A49K-01;TCGA-LN-A49O-01;TCGA-LN-A49U-01;TCGA-LN-A49V-01;TCGA-LN-A4A8-01;TCGA-LN-A7HV-01;TCGA-LN-A8I0-01;TCGA-LN-A9FQ-01;TCGA-V5-A7RC-01;TCGA-V5-AASV-01;TCGA-VR-A8ER-01;TCGA-VR-A8EY-01;TCGA-VR-A8EZ-01;TCGA-Z6-AAPN-01	no_validation_or_external_data_used
outer	7	5		METH_promoter_state	TCGA_Hallmark_METH_promoter_state_C01v1	z_score	outer_training_samples_only	outer_validation_samples	74	18	TCGA-IG-A3I8-01;TCGA-IG-A3QL-01;TCGA-IG-A3Y9-01;TCGA-IG-A3YA-01;TCGA-IG-A3YB-01;TCGA-IG-A4P3-01;TCGA-IG-A4QT-01;TCGA-IG-A50L-01;TCGA-IG-A51D-01;TCGA-IG-A5B8-01;TCGA-IG-A5S3-01;TCGA-IG-A625-01;TCGA-IG-A6QS-01;TCGA-IG-A97H-01;TCGA-IG-A97I-01;TCGA-JY-A6FA-01;TCGA-JY-A6FD-01;TCGA-JY-A6FG-01;TCGA-JY-A93F-01;TCGA-KH-A6WC-01;TCGA-L5-A43H-01;TCGA-L5-A4OM-01;TCGA-L5-A88W-01;TCGA-L5-A8NK-01;TCGA-L5-A8NQ-01…	TCGA-IG-A8O2-01;TCGA-JY-A6FE-01;TCGA-L5-A88S-01;TCGA-L5-A88Z-01;TCGA-LN-A49K-01;TCGA-LN-A49O-01;TCGA-LN-A49U-01;TCGA-LN-A49V-01;TCGA-LN-A4A8-01;TCGA-LN-A7HV-01;TCGA-LN-A8I0-01;TCGA-LN-A9FQ-01;TCGA-V5-A7RC-01;TCGA-V5-AASV-01;TCGA-VR-A8ER-01;TCGA-VR-A8EY-01;TCGA-VR-A8EZ-01;TCGA-Z6-AAPN-01	no_validation_or_external_data_used
outer	8	1		RNA_rank_activity	TCGA_Hallmark_RNA_rank_activity_C01v1	z_score	outer_training_samples_only	outer_validation_samples	72	20	TCGA-IG-A3I8-01;TCGA-IG-A3QL-01;TCGA-IG-A3Y9-01;TCGA-IG-A3YA-01;TCGA-IG-A3YB-01;TCGA-IG-A4P3-01;TCGA-IG-A4QT-01;TCGA-IG-A51D-01;TCGA-IG-A5B8-01;TCGA-IG-A5S3-01;TCGA-IG-A625-01;TCGA-IG-A8O2-01;TCGA-IG-A97H-01;TCGA-IG-A97I-01;TCGA-JY-A6FA-01;TCGA-JY-A6FD-01;TCGA-JY-A6FE-01;TCGA-KH-A6WC-01;TCGA-L5-A43H-01;TCGA-L5-A4OM-01;TCGA-L5-A88S-01;TCGA-L5-A88W-01;TCGA-L5-A88Z-01;TCGA-L5-A8NK-01;TCGA-L5-A8NQ-01…	TCGA-IG-A50L-01;TCGA-IG-A6QS-01;TCGA-JY-A6FG-01;TCGA-JY-A93F-01;TCGA-L7-A56G-01;TCGA-LN-A49K-01;TCGA-LN-A49L-01;TCGA-LN-A49O-01;TCGA-LN-A49X-01;TCGA-LN-A4A2-01;TCGA-LN-A4A8-01;TCGA-LN-A4MR-01;TCGA-LN-A5U5-01;TCGA-LN-A8HZ-01;TCGA-LN-A9FR-01;TCGA-VR-A8EP-01;TCGA-VR-A8Q7-01;TCGA-VR-AA4G-01;TCGA-VR-AA7I-01;TCGA-Z6-A8JE-01	no_validation_or_external_data_used
outer	8	1		CNV_abs_burden	TCGA_Hallmark_CNV_abs_burden_C01v1	z_score	outer_training_samples_only	outer_validation_samples	72	20	TCGA-IG-A3I8-01;TCGA-IG-A3QL-01;TCGA-IG-A3Y9-01;TCGA-IG-A3YA-01;TCGA-IG-A3YB-01;TCGA-IG-A4P3-01;TCGA-IG-A4QT-01;TCGA-IG-A51D-01;TCGA-IG-A5B8-01;TCGA-IG-A5S3-01;TCGA-IG-A625-01;TCGA-IG-A8O2-01;TCGA-IG-A97H-01;TCGA-IG-A97I-01;TCGA-JY-A6FA-01;TCGA-JY-A6FD-01;TCGA-JY-A6FE-01;TCGA-KH-A6WC-01;TCGA-L5-A43H-01;TCGA-L5-A4OM-01;TCGA-L5-A88S-01;TCGA-L5-A88W-01;TCGA-L5-A88Z-01;TCGA-L5-A8NK-01;TCGA-L5-A8NQ-01…	TCGA-IG-A50L-01;TCGA-IG-A6QS-01;TCGA-JY-A6FG-01;TCGA-JY-A93F-01;TCGA-L7-A56G-01;TCGA-LN-A49K-01;TCGA-LN-A49L-01;TCGA-LN-A49O-01;TCGA-LN-A49X-01;TCGA-LN-A4A2-01;TCGA-LN-A4A8-01;TCGA-LN-A4MR-01;TCGA-LN-A5U5-01;TCGA-LN-A8HZ-01;TCGA-LN-A9FR-01;TCGA-VR-A8EP-01;TCGA-VR-A8Q7-01;TCGA-VR-AA4G-01;TCGA-VR-AA7I-01;TCGA-Z6-A8JE-01	no_validation_or_external_data_used
outer	8	1		METH_promoter_state	TCGA_Hallmark_METH_promoter_state_C01v1	z_score	outer_training_samples_only	outer_validation_samples	72	20	TCGA-IG-A3I8-01;TCGA-IG-A3QL-01;TCGA-IG-A3Y9-01;TCGA-IG-A3YA-01;TCGA-IG-A3YB-01;TCGA-IG-A4P3-01;TCGA-IG-A4QT-01;TCGA-IG-A51D-01;TCGA-IG-A5B8-01;TCGA-IG-A5S3-01;TCGA-IG-A625-01;TCGA-IG-A8O2-01;TCGA-IG-A97H-01;TCGA-IG-A97I-01;TCGA-JY-A6FA-01;TCGA-JY-A6FD-01;TCGA-JY-A6FE-01;TCGA-KH-A6WC-01;TCGA-L5-A43H-01;TCGA-L5-A4OM-01;TCGA-L5-A88S-01;TCGA-L5-A88W-01;TCGA-L5-A88Z-01;TCGA-L5-A8NK-01;TCGA-L5-A8NQ-01…	TCGA-IG-A50L-01;TCGA-IG-A6QS-01;TCGA-JY-A6FG-01;TCGA-JY-A93F-01;TCGA-L7-A56G-01;TCGA-LN-A49K-01;TCGA-LN-A49L-01;TCGA-LN-A49O-01;TCGA-LN-A49X-01;TCGA-LN-A4A2-01;TCGA-LN-A4A8-01;TCGA-LN-A4MR-01;TCGA-LN-A5U5-01;TCGA-LN-A8HZ-01;TCGA-LN-A9FR-01;TCGA-VR-A8EP-01;TCGA-VR-A8Q7-01;TCGA-VR-AA4G-01;TCGA-VR-AA7I-01;TCGA-Z6-A8JE-01	no_validation_or_external_data_used
outer	8	2		RNA_rank_activity	TCGA_Hallmark_RNA_rank_activity_C01v1	z_score	outer_training_samples_only	outer_validation_samples	74	18	TCGA-IG-A3I8-01;TCGA-IG-A3QL-01;TCGA-IG-A3YA-01;TCGA-IG-A3YB-01;TCGA-IG-A4P3-01;TCGA-IG-A4QT-01;TCGA-IG-A50L-01;TCGA-IG-A5B8-01;TCGA-IG-A625-01;TCGA-IG-A6QS-01;TCGA-IG-A8O2-01;TCGA-IG-A97H-01;TCGA-IG-A97I-01;TCGA-JY-A6FA-01;TCGA-JY-A6FD-01;TCGA-JY-A6FE-01;TCGA-JY-A6FG-01;TCGA-JY-A93F-01;TCGA-KH-A6WC-01;TCGA-L5-A43H-01;TCGA-L5-A4OM-01;TCGA-L5-A88S-01;TCGA-L5-A88W-01;TCGA-L5-A88Z-01;TCGA-L5-A8NK-01…	TCGA-IG-A3Y9-01;TCGA-IG-A51D-01;TCGA-IG-A5S3-01;TCGA-L5-A8NQ-01;TCGA-LN-A49V-01;TCGA-LN-A49W-01;TCGA-LN-A4A1-01;TCGA-LN-A4A6-01;TCGA-LN-A4A9-01;TCGA-LN-A4MQ-01;TCGA-LN-A9FO-01;TCGA-LN-A9FP-01;TCGA-Q9-A6FU-01;TCGA-VR-A8EU-01;TCGA-VR-AA7B-01;TCGA-VR-AA7D-01;TCGA-XP-A8T8-01;TCGA-Z6-A8JD-01	no_validation_or_external_data_used
outer	8	2		CNV_abs_burden	TCGA_Hallmark_CNV_abs_burden_C01v1	z_score	outer_training_samples_only	outer_validation_samples	74	18	TCGA-IG-A3I8-01;TCGA-IG-A3QL-01;TCGA-IG-A3YA-01;TCGA-IG-A3YB-01;TCGA-IG-A4P3-01;TCGA-IG-A4QT-01;TCGA-IG-A50L-01;TCGA-IG-A5B8-01;TCGA-IG-A625-01;TCGA-IG-A6QS-01;TCGA-IG-A8O2-01;TCGA-IG-A97H-01;TCGA-IG-A97I-01;TCGA-JY-A6FA-01;TCGA-JY-A6FD-01;TCGA-JY-A6FE-01;TCGA-JY-A6FG-01;TCGA-JY-A93F-01;TCGA-KH-A6WC-01;TCGA-L5-A43H-01;TCGA-L5-A4OM-01;TCGA-L5-A88S-01;TCGA-L5-A88W-01;TCGA-L5-A88Z-01;TCGA-L5-A8NK-01…	TCGA-IG-A3Y9-01;TCGA-IG-A51D-01;TCGA-IG-A5S3-01;TCGA-L5-A8NQ-01;TCGA-LN-A49V-01;TCGA-LN-A49W-01;TCGA-LN-A4A1-01;TCGA-LN-A4A6-01;TCGA-LN-A4A9-01;TCGA-LN-A4MQ-01;TCGA-LN-A9FO-01;TCGA-LN-A9FP-01;TCGA-Q9-A6FU-01;TCGA-VR-A8EU-01;TCGA-VR-AA7B-01;TCGA-VR-AA7D-01;TCGA-XP-A8T8-01;TCGA-Z6-A8JD-01	no_validation_or_external_data_used
outer	8	2		METH_promoter_state	TCGA_Hallmark_METH_promoter_state_C01v1	z_score	outer_training_samples_only	outer_validation_samples	74	18	TCGA-IG-A3I8-01;TCGA-IG-A3QL-01;TCGA-IG-A3YA-01;TCGA-IG-A3YB-01;TCGA-IG-A4P3-01;TCGA-IG-A4QT-01;TCGA-IG-A50L-01;TCGA-IG-A5B8-01;TCGA-IG-A625-01;TCGA-IG-A6QS-01;TCGA-IG-A8O2-01;TCGA-IG-A97H-01;TCGA-IG-A97I-01;TCGA-JY-A6FA-01;TCGA-JY-A6FD-01;TCGA-JY-A6FE-01;TCGA-JY-A6FG-01;TCGA-JY-A93F-01;TCGA-KH-A6WC-01;TCGA-L5-A43H-01;TCGA-L5-A4OM-01;TCGA-L5-A88S-01;TCGA-L5-A88W-01;TCGA-L5-A88Z-01;TCGA-L5-A8NK-01…	TCGA-IG-A3Y9-01;TCGA-IG-A51D-01;TCGA-IG-A5S3-01;TCGA-L5-A8NQ-01;TCGA-LN-A49V-01;TCGA-LN-A49W-01;TCGA-LN-A4A1-01;TCGA-LN-A4A6-01;TCGA-LN-A4A9-01;TCGA-LN-A4MQ-01;TCGA-LN-A9FO-01;TCGA-LN-A9FP-01;TCGA-Q9-A6FU-01;TCGA-VR-A8EU-01;TCGA-VR-AA7B-01;TCGA-VR-AA7D-01;TCGA-XP-A8T8-01;TCGA-Z6-A8JD-01	no_validation_or_external_data_used
outer	8	3		RNA_rank_activity	TCGA_Hallmark_RNA_rank_activity_C01v1	z_score	outer_training_samples_only	outer_validation_samples	74	18	TCGA-IG-A3I8-01;TCGA-IG-A3QL-01;TCGA-IG-A3Y9-01;TCGA-IG-A3YA-01;TCGA-IG-A3YB-01;TCGA-IG-A4P3-01;TCGA-IG-A4QT-01;TCGA-IG-A50L-01;TCGA-IG-A51D-01;TCGA-IG-A5S3-01;TCGA-IG-A6QS-01;TCGA-IG-A8O2-01;TCGA-JY-A6FA-01;TCGA-JY-A6FD-01;TCGA-JY-A6FE-01;TCGA-JY-A6FG-01;TCGA-JY-A93F-01;TCGA-KH-A6WC-01;TCGA-L5-A43H-01;TCGA-L5-A88S-01;TCGA-L5-A88Z-01;TCGA-L5-A8NK-01;TCGA-L5-A8NQ-01;TCGA-L7-A56G-01;TCGA-LN-A49K-01…	TCGA-IG-A5B8-01;TCGA-IG-A625-01;TCGA-IG-A97H-01;TCGA-IG-A97I-01;TCGA-L5-A4OM-01;TCGA-L5-A88W-01;TCGA-LN-A49P-01;TCGA-LN-A49Y-01;TCGA-LN-A4A4-01;TCGA-LN-A5U7-01;TCGA-LN-A7HW-01;TCGA-LN-A7HY-01;TCGA-LN-A7HZ-01;TCGA-LN-A8I0-01;TCGA-S8-A6BW-01;TCGA-VR-A8EO-01;TCGA-VR-A8EX-01;TCGA-VR-A8EZ-01	no_validation_or_external_data_used
outer	8	3		CNV_abs_burden	TCGA_Hallmark_CNV_abs_burden_C01v1	z_score	outer_training_samples_only	outer_validation_samples	74	18	TCGA-IG-A3I8-01;TCGA-IG-A3QL-01;TCGA-IG-A3Y9-01;TCGA-IG-A3YA-01;TCGA-IG-A3YB-01;TCGA-IG-A4P3-01;TCGA-IG-A4QT-01;TCGA-IG-A50L-01;TCGA-IG-A51D-01;TCGA-IG-A5S3-01;TCGA-IG-A6QS-01;TCGA-IG-A8O2-01;TCGA-JY-A6FA-01;TCGA-JY-A6FD-01;TCGA-JY-A6FE-01;TCGA-JY-A6FG-01;TCGA-JY-A93F-01;TCGA-KH-A6WC-01;TCGA-L5-A43H-01;TCGA-L5-A88S-01;TCGA-L5-A88Z-01;TCGA-L5-A8NK-01;TCGA-L5-A8NQ-01;TCGA-L7-A56G-01;TCGA-LN-A49K-01…	TCGA-IG-A5B8-01;TCGA-IG-A625-01;TCGA-IG-A97H-01;TCGA-IG-A97I-01;TCGA-L5-A4OM-01;TCGA-L5-A88W-01;TCGA-LN-A49P-01;TCGA-LN-A49Y-01;TCGA-LN-A4A4-01;TCGA-LN-A5U7-01;TCGA-LN-A7HW-01;TCGA-LN-A7HY-01;TCGA-LN-A7HZ-01;TCGA-LN-A8I0-01;TCGA-S8-A6BW-01;TCGA-VR-A8EO-01;TCGA-VR-A8EX-01;TCGA-VR-A8EZ-01	no_validation_or_external_data_used
outer	8	3		METH_promoter_state	TCGA_Hallmark_METH_promoter_state_C01v1	z_score	outer_training_samples_only	outer_validation_samples	74	18	TCGA-IG-A3I8-01;TCGA-IG-A3QL-01;TCGA-IG-A3Y9-01;TCGA-IG-A3YA-01;TCGA-IG-A3YB-01;TCGA-IG-A4P3-01;TCGA-IG-A4QT-01;TCGA-IG-A50L-01;TCGA-IG-A51D-01;TCGA-IG-A5S3-01;TCGA-IG-A6QS-01;TCGA-IG-A8O2-01;TCGA-JY-A6FA-01;TCGA-JY-A6FD-01;TCGA-JY-A6FE-01;TCGA-JY-A6FG-01;TCGA-JY-A93F-01;TCGA-KH-A6WC-01;TCGA-L5-A43H-01;TCGA-L5-A88S-01;TCGA-L5-A88Z-01;TCGA-L5-A8NK-01;TCGA-L5-A8NQ-01;TCGA-L7-A56G-01;TCGA-LN-A49K-01…	TCGA-IG-A5B8-01;TCGA-IG-A625-01;TCGA-IG-A97H-01;TCGA-IG-A97I-01;TCGA-L5-A4OM-01;TCGA-L5-A88W-01;TCGA-LN-A49P-01;TCGA-LN-A49Y-01;TCGA-LN-A4A4-01;TCGA-LN-A5U7-01;TCGA-LN-A7HW-01;TCGA-LN-A7HY-01;TCGA-LN-A7HZ-01;TCGA-LN-A8I0-01;TCGA-S8-A6BW-01;TCGA-VR-A8EO-01;TCGA-VR-A8EX-01;TCGA-VR-A8EZ-01	no_validation_or_external_data_used
outer	8	4		RNA_rank_activity	TCGA_Hallmark_RNA_rank_activity_C01v1	z_score	outer_training_samples_only	outer_validation_samples	74	18	TCGA-IG-A3I8-01;TCGA-IG-A3Y9-01;TCGA-IG-A3YB-01;TCGA-IG-A4P3-01;TCGA-IG-A4QT-01;TCGA-IG-A50L-01;TCGA-IG-A51D-01;TCGA-IG-A5B8-01;TCGA-IG-A5S3-01;TCGA-IG-A625-01;TCGA-IG-A6QS-01;TCGA-IG-A8O2-01;TCGA-IG-A97H-01;TCGA-IG-A97I-01;TCGA-JY-A6FA-01;TCGA-JY-A6FD-01;TCGA-JY-A6FG-01;TCGA-JY-A93F-01;TCGA-KH-A6WC-01;TCGA-L5-A4OM-01;TCGA-L5-A88W-01;TCGA-L5-A8NK-01;TCGA-L5-A8NQ-01;TCGA-L7-A56G-01;TCGA-LN-A49K-01…	TCGA-IG-A3QL-01;TCGA-IG-A3YA-01;TCGA-JY-A6FE-01;TCGA-L5-A43H-01;TCGA-L5-A88S-01;TCGA-L5-A88Z-01;TCGA-LN-A49N-01;TCGA-LN-A49R-01;TCGA-LN-A4A3-01;TCGA-LN-A7HX-01;TCGA-LN-A9FQ-01;TCGA-V5-A7RC-01;TCGA-V5-AASV-01;TCGA-VR-A8ER-01;TCGA-VR-A8EW-01;TCGA-VR-A8EY-01;TCGA-XP-A8T6-01;TCGA-Z6-A9VB-01	no_validation_or_external_data_used
outer	8	4		CNV_abs_burden	TCGA_Hallmark_CNV_abs_burden_C01v1	z_score	outer_training_samples_only	outer_validation_samples	74	18	TCGA-IG-A3I8-01;TCGA-IG-A3Y9-01;TCGA-IG-A3YB-01;TCGA-IG-A4P3-01;TCGA-IG-A4QT-01;TCGA-IG-A50L-01;TCGA-IG-A51D-01;TCGA-IG-A5B8-01;TCGA-IG-A5S3-01;TCGA-IG-A625-01;TCGA-IG-A6QS-01;TCGA-IG-A8O2-01;TCGA-IG-A97H-01;TCGA-IG-A97I-01;TCGA-JY-A6FA-01;TCGA-JY-A6FD-01;TCGA-JY-A6FG-01;TCGA-JY-A93F-01;TCGA-KH-A6WC-01;TCGA-L5-A4OM-01;TCGA-L5-A88W-01;TCGA-L5-A8NK-01;TCGA-L5-A8NQ-01;TCGA-L7-A56G-01;TCGA-LN-A49K-01…	TCGA-IG-A3QL-01;TCGA-IG-A3YA-01;TCGA-JY-A6FE-01;TCGA-L5-A43H-01;TCGA-L5-A88S-01;TCGA-L5-A88Z-01;TCGA-LN-A49N-01;TCGA-LN-A49R-01;TCGA-LN-A4A3-01;TCGA-LN-A7HX-01;TCGA-LN-A9FQ-01;TCGA-V5-A7RC-01;TCGA-V5-AASV-01;TCGA-VR-A8ER-01;TCGA-VR-A8EW-01;TCGA-VR-A8EY-01;TCGA-XP-A8T6-01;TCGA-Z6-A9VB-01	no_validation_or_external_data_used
outer	8	4		METH_promoter_state	TCGA_Hallmark_METH_promoter_state_C01v1	z_score	outer_training_samples_only	outer_validation_samples	74	18	TCGA-IG-A3I8-01;TCGA-IG-A3Y9-01;TCGA-IG-A3YB-01;TCGA-IG-A4P3-01;TCGA-IG-A4QT-01;TCGA-IG-A50L-01;TCGA-IG-A51D-01;TCGA-IG-A5B8-01;TCGA-IG-A5S3-01;TCGA-IG-A625-01;TCGA-IG-A6QS-01;TCGA-IG-A8O2-01;TCGA-IG-A97H-01;TCGA-IG-A97I-01;TCGA-JY-A6FA-01;TCGA-JY-A6FD-01;TCGA-JY-A6FG-01;TCGA-JY-A93F-01;TCGA-KH-A6WC-01;TCGA-L5-A4OM-01;TCGA-L5-A88W-01;TCGA-L5-A8NK-01;TCGA-L5-A8NQ-01;TCGA-L7-A56G-01;TCGA-LN-A49K-01…	TCGA-IG-A3QL-01;TCGA-IG-A3YA-01;TCGA-JY-A6FE-01;TCGA-L5-A43H-01;TCGA-L5-A88S-01;TCGA-L5-A88Z-01;TCGA-LN-A49N-01;TCGA-LN-A49R-01;TCGA-LN-A4A3-01;TCGA-LN-A7HX-01;TCGA-LN-A9FQ-01;TCGA-V5-A7RC-01;TCGA-V5-AASV-01;TCGA-VR-A8ER-01;TCGA-VR-A8EW-01;TCGA-VR-A8EY-01;TCGA-XP-A8T6-01;TCGA-Z6-A9VB-01	no_validation_or_external_data_used
outer	8	5		RNA_rank_activity	TCGA_Hallmark_RNA_rank_activity_C01v1	z_score	outer_training_samples_only	outer_validation_samples	74	18	TCGA-IG-A3QL-01;TCGA-IG-A3Y9-01;TCGA-IG-A3YA-01;TCGA-IG-A50L-01;TCGA-IG-A51D-01;TCGA-IG-A5B8-01;TCGA-IG-A5S3-01;TCGA-IG-A625-01;TCGA-IG-A6QS-01;TCGA-IG-A97H-01;TCGA-IG-A97I-01;TCGA-JY-A6FE-01;TCGA-JY-A6FG-01;TCGA-JY-A93F-01;TCGA-L5-A43H-01;TCGA-L5-A4OM-01;TCGA-L5-A88S-01;TCGA-L5-A88W-01;TCGA-L5-A88Z-01;TCGA-L5-A8NQ-01;TCGA-L7-A56G-01;TCGA-LN-A49K-01;TCGA-LN-A49L-01;TCGA-LN-A49N-01;TCGA-LN-A49O-01…	TCGA-IG-A3I8-01;TCGA-IG-A3YB-01;TCGA-IG-A4P3-01;TCGA-IG-A4QT-01;TCGA-IG-A8O2-01;TCGA-JY-A6FA-01;TCGA-JY-A6FD-01;TCGA-KH-A6WC-01;TCGA-L5-A8NK-01;TCGA-LN-A49M-01;TCGA-LN-A49S-01;TCGA-LN-A49U-01;TCGA-LN-A4A5-01;TCGA-LN-A5U6-01;TCGA-LN-A7HV-01;TCGA-LN-A8I1-01;TCGA-VR-A8ET-01;TCGA-Z6-AAPN-01	no_validation_or_external_data_used
outer	8	5		CNV_abs_burden	TCGA_Hallmark_CNV_abs_burden_C01v1	z_score	outer_training_samples_only	outer_validation_samples	74	18	TCGA-IG-A3QL-01;TCGA-IG-A3Y9-01;TCGA-IG-A3YA-01;TCGA-IG-A50L-01;TCGA-IG-A51D-01;TCGA-IG-A5B8-01;TCGA-IG-A5S3-01;TCGA-IG-A625-01;TCGA-IG-A6QS-01;TCGA-IG-A97H-01;TCGA-IG-A97I-01;TCGA-JY-A6FE-01;TCGA-JY-A6FG-01;TCGA-JY-A93F-01;TCGA-L5-A43H-01;TCGA-L5-A4OM-01;TCGA-L5-A88S-01;TCGA-L5-A88W-01;TCGA-L5-A88Z-01;TCGA-L5-A8NQ-01;TCGA-L7-A56G-01;TCGA-LN-A49K-01;TCGA-LN-A49L-01;TCGA-LN-A49N-01;TCGA-LN-A49O-01…	TCGA-IG-A3I8-01;TCGA-IG-A3YB-01;TCGA-IG-A4P3-01;TCGA-IG-A4QT-01;TCGA-IG-A8O2-01;TCGA-JY-A6FA-01;TCGA-JY-A6FD-01;TCGA-KH-A6WC-01;TCGA-L5-A8NK-01;TCGA-LN-A49M-01;TCGA-LN-A49S-01;TCGA-LN-A49U-01;TCGA-LN-A4A5-01;TCGA-LN-A5U6-01;TCGA-LN-A7HV-01;TCGA-LN-A8I1-01;TCGA-VR-A8ET-01;TCGA-Z6-AAPN-01	no_validation_or_external_data_used
outer	8	5		METH_promoter_state	TCGA_Hallmark_METH_promoter_state_C01v1	z_score	outer_training_samples_only	outer_validation_samples	74	18	TCGA-IG-A3QL-01;TCGA-IG-A3Y9-01;TCGA-IG-A3YA-01;TCGA-IG-A50L-01;TCGA-IG-A51D-01;TCGA-IG-A5B8-01;TCGA-IG-A5S3-01;TCGA-IG-A625-01;TCGA-IG-A6QS-01;TCGA-IG-A97H-01;TCGA-IG-A97I-01;TCGA-JY-A6FE-01;TCGA-JY-A6FG-01;TCGA-JY-A93F-01;TCGA-L5-A43H-01;TCGA-L5-A4OM-01;TCGA-L5-A88S-01;TCGA-L5-A88W-01;TCGA-L5-A88Z-01;TCGA-L5-A8NQ-01;TCGA-L7-A56G-01;TCGA-LN-A49K-01;TCGA-LN-A49L-01;TCGA-LN-A49N-01;TCGA-LN-A49O-01…	TCGA-IG-A3I8-01;TCGA-IG-A3YB-01;TCGA-IG-A4P3-01;TCGA-IG-A4QT-01;TCGA-IG-A8O2-01;TCGA-JY-A6FA-01;TCGA-JY-A6FD-01;TCGA-KH-A6WC-01;TCGA-L5-A8NK-01;TCGA-LN-A49M-01;TCGA-LN-A49S-01;TCGA-LN-A49U-01;TCGA-LN-A4A5-01;TCGA-LN-A5U6-01;TCGA-LN-A7HV-01;TCGA-LN-A8I1-01;TCGA-VR-A8ET-01;TCGA-Z6-AAPN-01	no_validation_or_external_data_used
outer	9	1		RNA_rank_activity	TCGA_Hallmark_RNA_rank_activity_C01v1	z_score	outer_training_samples_only	outer_validation_samples	72	20	TCGA-IG-A3QL-01;TCGA-IG-A3Y9-01;TCGA-IG-A3YA-01;TCGA-IG-A3YB-01;TCGA-IG-A50L-01;TCGA-IG-A51D-01;TCGA-IG-A5B8-01;TCGA-IG-A5S3-01;TCGA-IG-A625-01;TCGA-IG-A6QS-01;TCGA-IG-A8O2-01;TCGA-IG-A97H-01;TCGA-IG-A97I-01;TCGA-JY-A6FA-01;TCGA-JY-A6FD-01;TCGA-JY-A6FE-01;TCGA-JY-A6FG-01;TCGA-JY-A93F-01;TCGA-L5-A43H-01;TCGA-L5-A4OM-01;TCGA-L5-A88Z-01;TCGA-L5-A8NK-01;TCGA-L5-A8NQ-01;TCGA-L7-A56G-01;TCGA-LN-A49K-01…	TCGA-IG-A3I8-01;TCGA-IG-A4P3-01;TCGA-IG-A4QT-01;TCGA-KH-A6WC-01;TCGA-L5-A88S-01;TCGA-L5-A88W-01;TCGA-LN-A49N-01;TCGA-LN-A49U-01;TCGA-LN-A4A4-01;TCGA-LN-A4A5-01;TCGA-LN-A9FQ-01;TCGA-LN-A9FR-01;TCGA-Q9-A6FU-01;TCGA-S8-A6BW-01;TCGA-V5-A7RC-01;TCGA-VR-A8ET-01;TCGA-VR-A8EY-01;TCGA-VR-AA7B-01;TCGA-Z6-A8JD-01;TCGA-Z6-A8JE-01	no_validation_or_external_data_used
outer	9	1		CNV_abs_burden	TCGA_Hallmark_CNV_abs_burden_C01v1	z_score	outer_training_samples_only	outer_validation_samples	72	20	TCGA-IG-A3QL-01;TCGA-IG-A3Y9-01;TCGA-IG-A3YA-01;TCGA-IG-A3YB-01;TCGA-IG-A50L-01;TCGA-IG-A51D-01;TCGA-IG-A5B8-01;TCGA-IG-A5S3-01;TCGA-IG-A625-01;TCGA-IG-A6QS-01;TCGA-IG-A8O2-01;TCGA-IG-A97H-01;TCGA-IG-A97I-01;TCGA-JY-A6FA-01;TCGA-JY-A6FD-01;TCGA-JY-A6FE-01;TCGA-JY-A6FG-01;TCGA-JY-A93F-01;TCGA-L5-A43H-01;TCGA-L5-A4OM-01;TCGA-L5-A88Z-01;TCGA-L5-A8NK-01;TCGA-L5-A8NQ-01;TCGA-L7-A56G-01;TCGA-LN-A49K-01…	TCGA-IG-A3I8-01;TCGA-IG-A4P3-01;TCGA-IG-A4QT-01;TCGA-KH-A6WC-01;TCGA-L5-A88S-01;TCGA-L5-A88W-01;TCGA-LN-A49N-01;TCGA-LN-A49U-01;TCGA-LN-A4A4-01;TCGA-LN-A4A5-01;TCGA-LN-A9FQ-01;TCGA-LN-A9FR-01;TCGA-Q9-A6FU-01;TCGA-S8-A6BW-01;TCGA-V5-A7RC-01;TCGA-VR-A8ET-01;TCGA-VR-A8EY-01;TCGA-VR-AA7B-01;TCGA-Z6-A8JD-01;TCGA-Z6-A8JE-01	no_validation_or_external_data_used
outer	9	1		METH_promoter_state	TCGA_Hallmark_METH_promoter_state_C01v1	z_score	outer_training_samples_only	outer_validation_samples	72	20	TCGA-IG-A3QL-01;TCGA-IG-A3Y9-01;TCGA-IG-A3YA-01;TCGA-IG-A3YB-01;TCGA-IG-A50L-01;TCGA-IG-A51D-01;TCGA-IG-A5B8-01;TCGA-IG-A5S3-01;TCGA-IG-A625-01;TCGA-IG-A6QS-01;TCGA-IG-A8O2-01;TCGA-IG-A97H-01;TCGA-IG-A97I-01;TCGA-JY-A6FA-01;TCGA-JY-A6FD-01;TCGA-JY-A6FE-01;TCGA-JY-A6FG-01;TCGA-JY-A93F-01;TCGA-L5-A43H-01;TCGA-L5-A4OM-01;TCGA-L5-A88Z-01;TCGA-L5-A8NK-01;TCGA-L5-A8NQ-01;TCGA-L7-A56G-01;TCGA-LN-A49K-01…	TCGA-IG-A3I8-01;TCGA-IG-A4P3-01;TCGA-IG-A4QT-01;TCGA-KH-A6WC-01;TCGA-L5-A88S-01;TCGA-L5-A88W-01;TCGA-LN-A49N-01;TCGA-LN-A49U-01;TCGA-LN-A4A4-01;TCGA-LN-A4A5-01;TCGA-LN-A9FQ-01;TCGA-LN-A9FR-01;TCGA-Q9-A6FU-01;TCGA-S8-A6BW-01;TCGA-V5-A7RC-01;TCGA-VR-A8ET-01;TCGA-VR-A8EY-01;TCGA-VR-AA7B-01;TCGA-Z6-A8JD-01;TCGA-Z6-A8JE-01	no_validation_or_external_data_used
outer	9	2		RNA_rank_activity	TCGA_Hallmark_RNA_rank_activity_C01v1	z_score	outer_training_samples_only	outer_validation_samples	74	18	TCGA-IG-A3I8-01;TCGA-IG-A3QL-01;TCGA-IG-A3Y9-01;TCGA-IG-A3YA-01;TCGA-IG-A3YB-01;TCGA-IG-A4P3-01;TCGA-IG-A4QT-01;TCGA-IG-A50L-01;TCGA-IG-A51D-01;TCGA-IG-A5B8-01;TCGA-IG-A5S3-01;TCGA-IG-A625-01;TCGA-IG-A6QS-01;TCGA-IG-A97H-01;TCGA-IG-A97I-01;TCGA-JY-A6FA-01;TCGA-JY-A6FD-01;TCGA-JY-A6FE-01;TCGA-JY-A6FG-01;TCGA-JY-A93F-01;TCGA-KH-A6WC-01;TCGA-L5-A88S-01;TCGA-L5-A88W-01;TCGA-L5-A88Z-01;TCGA-L5-A8NK-01…	TCGA-IG-A8O2-01;TCGA-L5-A43H-01;TCGA-L5-A4OM-01;TCGA-L7-A56G-01;TCGA-LN-A49P-01;TCGA-LN-A49R-01;TCGA-LN-A4A2-01;TCGA-LN-A4A6-01;TCGA-LN-A7HW-01;TCGA-LN-A7HY-01;TCGA-LN-A9FO-01;TCGA-LN-A9FP-01;TCGA-VR-A8EO-01;TCGA-VR-A8EP-01;TCGA-VR-A8ER-01;TCGA-XP-A8T6-01;TCGA-XP-A8T8-01;TCGA-Z6-A9VB-01	no_validation_or_external_data_used
outer	9	2		CNV_abs_burden	TCGA_Hallmark_CNV_abs_burden_C01v1	z_score	outer_training_samples_only	outer_validation_samples	74	18	TCGA-IG-A3I8-01;TCGA-IG-A3QL-01;TCGA-IG-A3Y9-01;TCGA-IG-A3YA-01;TCGA-IG-A3YB-01;TCGA-IG-A4P3-01;TCGA-IG-A4QT-01;TCGA-IG-A50L-01;TCGA-IG-A51D-01;TCGA-IG-A5B8-01;TCGA-IG-A5S3-01;TCGA-IG-A625-01;TCGA-IG-A6QS-01;TCGA-IG-A97H-01;TCGA-IG-A97I-01;TCGA-JY-A6FA-01;TCGA-JY-A6FD-01;TCGA-JY-A6FE-01;TCGA-JY-A6FG-01;TCGA-JY-A93F-01;TCGA-KH-A6WC-01;TCGA-L5-A88S-01;TCGA-L5-A88W-01;TCGA-L5-A88Z-01;TCGA-L5-A8NK-01…	TCGA-IG-A8O2-01;TCGA-L5-A43H-01;TCGA-L5-A4OM-01;TCGA-L7-A56G-01;TCGA-LN-A49P-01;TCGA-LN-A49R-01;TCGA-LN-A4A2-01;TCGA-LN-A4A6-01;TCGA-LN-A7HW-01;TCGA-LN-A7HY-01;TCGA-LN-A9FO-01;TCGA-LN-A9FP-01;TCGA-VR-A8EO-01;TCGA-VR-A8EP-01;TCGA-VR-A8ER-01;TCGA-XP-A8T6-01;TCGA-XP-A8T8-01;TCGA-Z6-A9VB-01	no_validation_or_external_data_used
outer	9	2		METH_promoter_state	TCGA_Hallmark_METH_promoter_state_C01v1	z_score	outer_training_samples_only	outer_validation_samples	74	18	TCGA-IG-A3I8-01;TCGA-IG-A3QL-01;TCGA-IG-A3Y9-01;TCGA-IG-A3YA-01;TCGA-IG-A3YB-01;TCGA-IG-A4P3-01;TCGA-IG-A4QT-01;TCGA-IG-A50L-01;TCGA-IG-A51D-01;TCGA-IG-A5B8-01;TCGA-IG-A5S3-01;TCGA-IG-A625-01;TCGA-IG-A6QS-01;TCGA-IG-A97H-01;TCGA-IG-A97I-01;TCGA-JY-A6FA-01;TCGA-JY-A6FD-01;TCGA-JY-A6FE-01;TCGA-JY-A6FG-01;TCGA-JY-A93F-01;TCGA-KH-A6WC-01;TCGA-L5-A88S-01;TCGA-L5-A88W-01;TCGA-L5-A88Z-01;TCGA-L5-A8NK-01…	TCGA-IG-A8O2-01;TCGA-L5-A43H-01;TCGA-L5-A4OM-01;TCGA-L7-A56G-01;TCGA-LN-A49P-01;TCGA-LN-A49R-01;TCGA-LN-A4A2-01;TCGA-LN-A4A6-01;TCGA-LN-A7HW-01;TCGA-LN-A7HY-01;TCGA-LN-A9FO-01;TCGA-LN-A9FP-01;TCGA-VR-A8EO-01;TCGA-VR-A8EP-01;TCGA-VR-A8ER-01;TCGA-XP-A8T6-01;TCGA-XP-A8T8-01;TCGA-Z6-A9VB-01	no_validation_or_external_data_used
outer	9	3		RNA_rank_activity	TCGA_Hallmark_RNA_rank_activity_C01v1	z_score	outer_training_samples_only	outer_validation_samples	74	18	TCGA-IG-A3I8-01;TCGA-IG-A3QL-01;TCGA-IG-A3Y9-01;TCGA-IG-A3YA-01;TCGA-IG-A4P3-01;TCGA-IG-A4QT-01;TCGA-IG-A51D-01;TCGA-IG-A5B8-01;TCGA-IG-A5S3-01;TCGA-IG-A625-01;TCGA-IG-A6QS-01;TCGA-IG-A8O2-01;TCGA-IG-A97H-01;TCGA-IG-A97I-01;TCGA-JY-A6FA-01;TCGA-JY-A6FE-01;TCGA-JY-A6FG-01;TCGA-KH-A6WC-01;TCGA-L5-A43H-01;TCGA-L5-A4OM-01;TCGA-L5-A88S-01;TCGA-L5-A88W-01;TCGA-L5-A8NK-01;TCGA-L5-A8NQ-01;TCGA-L7-A56G-01…	TCGA-IG-A3YB-01;TCGA-IG-A50L-01;TCGA-JY-A6FD-01;TCGA-JY-A93F-01;TCGA-L5-A88Z-01;TCGA-LN-A49K-01;TCGA-LN-A49L-01;TCGA-LN-A49V-01;TCGA-LN-A49Y-01;TCGA-LN-A4A9-01;TCGA-LN-A4MQ-01;TCGA-LN-A5U7-01;TCGA-LN-A7HX-01;TCGA-LN-A8HZ-01;TCGA-VR-A8EZ-01;TCGA-VR-AA4G-01;TCGA-VR-AA7D-01;TCGA-VR-AA7I-01	no_validation_or_external_data_used
outer	9	3		CNV_abs_burden	TCGA_Hallmark_CNV_abs_burden_C01v1	z_score	outer_training_samples_only	outer_validation_samples	74	18	TCGA-IG-A3I8-01;TCGA-IG-A3QL-01;TCGA-IG-A3Y9-01;TCGA-IG-A3YA-01;TCGA-IG-A4P3-01;TCGA-IG-A4QT-01;TCGA-IG-A51D-01;TCGA-IG-A5B8-01;TCGA-IG-A5S3-01;TCGA-IG-A625-01;TCGA-IG-A6QS-01;TCGA-IG-A8O2-01;TCGA-IG-A97H-01;TCGA-IG-A97I-01;TCGA-JY-A6FA-01;TCGA-JY-A6FE-01;TCGA-JY-A6FG-01;TCGA-KH-A6WC-01;TCGA-L5-A43H-01;TCGA-L5-A4OM-01;TCGA-L5-A88S-01;TCGA-L5-A88W-01;TCGA-L5-A8NK-01;TCGA-L5-A8NQ-01;TCGA-L7-A56G-01…	TCGA-IG-A3YB-01;TCGA-IG-A50L-01;TCGA-JY-A6FD-01;TCGA-JY-A93F-01;TCGA-L5-A88Z-01;TCGA-LN-A49K-01;TCGA-LN-A49L-01;TCGA-LN-A49V-01;TCGA-LN-A49Y-01;TCGA-LN-A4A9-01;TCGA-LN-A4MQ-01;TCGA-LN-A5U7-01;TCGA-LN-A7HX-01;TCGA-LN-A8HZ-01;TCGA-VR-A8EZ-01;TCGA-VR-AA4G-01;TCGA-VR-AA7D-01;TCGA-VR-AA7I-01	no_validation_or_external_data_used
outer	9	3		METH_promoter_state	TCGA_Hallmark_METH_promoter_state_C01v1	z_score	outer_training_samples_only	outer_validation_samples	74	18	TCGA-IG-A3I8-01;TCGA-IG-A3QL-01;TCGA-IG-A3Y9-01;TCGA-IG-A3YA-01;TCGA-IG-A4P3-01;TCGA-IG-A4QT-01;TCGA-IG-A51D-01;TCGA-IG-A5B8-01;TCGA-IG-A5S3-01;TCGA-IG-A625-01;TCGA-IG-A6QS-01;TCGA-IG-A8O2-01;TCGA-IG-A97H-01;TCGA-IG-A97I-01;TCGA-JY-A6FA-01;TCGA-JY-A6FE-01;TCGA-JY-A6FG-01;TCGA-KH-A6WC-01;TCGA-L5-A43H-01;TCGA-L5-A4OM-01;TCGA-L5-A88S-01;TCGA-L5-A88W-01;TCGA-L5-A8NK-01;TCGA-L5-A8NQ-01;TCGA-L7-A56G-01…	TCGA-IG-A3YB-01;TCGA-IG-A50L-01;TCGA-JY-A6FD-01;TCGA-JY-A93F-01;TCGA-L5-A88Z-01;TCGA-LN-A49K-01;TCGA-LN-A49L-01;TCGA-LN-A49V-01;TCGA-LN-A49Y-01;TCGA-LN-A4A9-01;TCGA-LN-A4MQ-01;TCGA-LN-A5U7-01;TCGA-LN-A7HX-01;TCGA-LN-A8HZ-01;TCGA-VR-A8EZ-01;TCGA-VR-AA4G-01;TCGA-VR-AA7D-01;TCGA-VR-AA7I-01	no_validation_or_external_data_used
outer	9	4		RNA_rank_activity	TCGA_Hallmark_RNA_rank_activity_C01v1	z_score	outer_training_samples_only	outer_validation_samples	74	18	TCGA-IG-A3I8-01;TCGA-IG-A3QL-01;TCGA-IG-A3YA-01;TCGA-IG-A3YB-01;TCGA-IG-A4P3-01;TCGA-IG-A4QT-01;TCGA-IG-A50L-01;TCGA-IG-A51D-01;TCGA-IG-A5S3-01;TCGA-IG-A6QS-01;TCGA-IG-A8O2-01;TCGA-JY-A6FA-01;TCGA-JY-A6FD-01;TCGA-JY-A6FG-01;TCGA-JY-A93F-01;TCGA-KH-A6WC-01;TCGA-L5-A43H-01;TCGA-L5-A4OM-01;TCGA-L5-A88S-01;TCGA-L5-A88W-01;TCGA-L5-A88Z-01;TCGA-L5-A8NK-01;TCGA-L7-A56G-01;TCGA-LN-A49K-01;TCGA-LN-A49L-01…	TCGA-IG-A3Y9-01;TCGA-IG-A5B8-01;TCGA-IG-A625-01;TCGA-IG-A97H-01;TCGA-IG-A97I-01;TCGA-JY-A6FE-01;TCGA-L5-A8NQ-01;TCGA-LN-A49W-01;TCGA-LN-A49X-01;TCGA-LN-A4A8-01;TCGA-LN-A4MR-01;TCGA-LN-A5U5-01;TCGA-LN-A5U6-01;TCGA-LN-A7HV-01;TCGA-LN-A8I1-01;TCGA-V5-AASV-01;TCGA-VR-A8Q7-01;TCGA-Z6-AAPN-01	no_validation_or_external_data_used
outer	9	4		CNV_abs_burden	TCGA_Hallmark_CNV_abs_burden_C01v1	z_score	outer_training_samples_only	outer_validation_samples	74	18	TCGA-IG-A3I8-01;TCGA-IG-A3QL-01;TCGA-IG-A3YA-01;TCGA-IG-A3YB-01;TCGA-IG-A4P3-01;TCGA-IG-A4QT-01;TCGA-IG-A50L-01;TCGA-IG-A51D-01;TCGA-IG-A5S3-01;TCGA-IG-A6QS-01;TCGA-IG-A8O2-01;TCGA-JY-A6FA-01;TCGA-JY-A6FD-01;TCGA-JY-A6FG-01;TCGA-JY-A93F-01;TCGA-KH-A6WC-01;TCGA-L5-A43H-01;TCGA-L5-A4OM-01;TCGA-L5-A88S-01;TCGA-L5-A88W-01;TCGA-L5-A88Z-01;TCGA-L5-A8NK-01;TCGA-L7-A56G-01;TCGA-LN-A49K-01;TCGA-LN-A49L-01…	TCGA-IG-A3Y9-01;TCGA-IG-A5B8-01;TCGA-IG-A625-01;TCGA-IG-A97H-01;TCGA-IG-A97I-01;TCGA-JY-A6FE-01;TCGA-L5-A8NQ-01;TCGA-LN-A49W-01;TCGA-LN-A49X-01;TCGA-LN-A4A8-01;TCGA-LN-A4MR-01;TCGA-LN-A5U5-01;TCGA-LN-A5U6-01;TCGA-LN-A7HV-01;TCGA-LN-A8I1-01;TCGA-V5-AASV-01;TCGA-VR-A8Q7-01;TCGA-Z6-AAPN-01	no_validation_or_external_data_used
outer	9	4		METH_promoter_state	TCGA_Hallmark_METH_promoter_state_C01v1	z_score	outer_training_samples_only	outer_validation_samples	74	18	TCGA-IG-A3I8-01;TCGA-IG-A3QL-01;TCGA-IG-A3YA-01;TCGA-IG-A3YB-01;TCGA-IG-A4P3-01;TCGA-IG-A4QT-01;TCGA-IG-A50L-01;TCGA-IG-A51D-01;TCGA-IG-A5S3-01;TCGA-IG-A6QS-01;TCGA-IG-A8O2-01;TCGA-JY-A6FA-01;TCGA-JY-A6FD-01;TCGA-JY-A6FG-01;TCGA-JY-A93F-01;TCGA-KH-A6WC-01;TCGA-L5-A43H-01;TCGA-L5-A4OM-01;TCGA-L5-A88S-01;TCGA-L5-A88W-01;TCGA-L5-A88Z-01;TCGA-L5-A8NK-01;TCGA-L7-A56G-01;TCGA-LN-A49K-01;TCGA-LN-A49L-01…	TCGA-IG-A3Y9-01;TCGA-IG-A5B8-01;TCGA-IG-A625-01;TCGA-IG-A97H-01;TCGA-IG-A97I-01;TCGA-JY-A6FE-01;TCGA-L5-A8NQ-01;TCGA-LN-A49W-01;TCGA-LN-A49X-01;TCGA-LN-A4A8-01;TCGA-LN-A4MR-01;TCGA-LN-A5U5-01;TCGA-LN-A5U6-01;TCGA-LN-A7HV-01;TCGA-LN-A8I1-01;TCGA-V5-AASV-01;TCGA-VR-A8Q7-01;TCGA-Z6-AAPN-01	no_validation_or_external_data_used
outer	9	5		RNA_rank_activity	TCGA_Hallmark_RNA_rank_activity_C01v1	z_score	outer_training_samples_only	outer_validation_samples	74	18	TCGA-IG-A3I8-01;TCGA-IG-A3Y9-01;TCGA-IG-A3YB-01;TCGA-IG-A4P3-01;TCGA-IG-A4QT-01;TCGA-IG-A50L-01;TCGA-IG-A5B8-01;TCGA-IG-A625-01;TCGA-IG-A8O2-01;TCGA-IG-A97H-01;TCGA-IG-A97I-01;TCGA-JY-A6FD-01;TCGA-JY-A6FE-01;TCGA-JY-A93F-01;TCGA-KH-A6WC-01;TCGA-L5-A43H-01;TCGA-L5-A4OM-01;TCGA-L5-A88S-01;TCGA-L5-A88W-01;TCGA-L5-A88Z-01;TCGA-L5-A8NQ-01;TCGA-L7-A56G-01;TCGA-LN-A49K-01;TCGA-LN-A49L-01;TCGA-LN-A49N-01…	TCGA-IG-A3QL-01;TCGA-IG-A3YA-01;TCGA-IG-A51D-01;TCGA-IG-A5S3-01;TCGA-IG-A6QS-01;TCGA-JY-A6FA-01;TCGA-JY-A6FG-01;TCGA-L5-A8NK-01;TCGA-LN-A49M-01;TCGA-LN-A49O-01;TCGA-LN-A49S-01;TCGA-LN-A4A1-01;TCGA-LN-A4A3-01;TCGA-LN-A7HZ-01;TCGA-LN-A8I0-01;TCGA-VR-A8EU-01;TCGA-VR-A8EW-01;TCGA-VR-A8EX-01	no_validation_or_external_data_used
outer	9	5		CNV_abs_burden	TCGA_Hallmark_CNV_abs_burden_C01v1	z_score	outer_training_samples_only	outer_validation_samples	74	18	TCGA-IG-A3I8-01;TCGA-IG-A3Y9-01;TCGA-IG-A3YB-01;TCGA-IG-A4P3-01;TCGA-IG-A4QT-01;TCGA-IG-A50L-01;TCGA-IG-A5B8-01;TCGA-IG-A625-01;TCGA-IG-A8O2-01;TCGA-IG-A97H-01;TCGA-IG-A97I-01;TCGA-JY-A6FD-01;TCGA-JY-A6FE-01;TCGA-JY-A93F-01;TCGA-KH-A6WC-01;TCGA-L5-A43H-01;TCGA-L5-A4OM-01;TCGA-L5-A88S-01;TCGA-L5-A88W-01;TCGA-L5-A88Z-01;TCGA-L5-A8NQ-01;TCGA-L7-A56G-01;TCGA-LN-A49K-01;TCGA-LN-A49L-01;TCGA-LN-A49N-01…	TCGA-IG-A3QL-01;TCGA-IG-A3YA-01;TCGA-IG-A51D-01;TCGA-IG-A5S3-01;TCGA-IG-A6QS-01;TCGA-JY-A6FA-01;TCGA-JY-A6FG-01;TCGA-L5-A8NK-01;TCGA-LN-A49M-01;TCGA-LN-A49O-01;TCGA-LN-A49S-01;TCGA-LN-A4A1-01;TCGA-LN-A4A3-01;TCGA-LN-A7HZ-01;TCGA-LN-A8I0-01;TCGA-VR-A8EU-01;TCGA-VR-A8EW-01;TCGA-VR-A8EX-01	no_validation_or_external_data_used
outer	9	5		METH_promoter_state	TCGA_Hallmark_METH_promoter_state_C01v1	z_score	outer_training_samples_only	outer_validation_samples	74	18	TCGA-IG-A3I8-01;TCGA-IG-A3Y9-01;TCGA-IG-A3YB-01;TCGA-IG-A4P3-01;TCGA-IG-A4QT-01;TCGA-IG-A50L-01;TCGA-IG-A5B8-01;TCGA-IG-A625-01;TCGA-IG-A8O2-01;TCGA-IG-A97H-01;TCGA-IG-A97I-01;TCGA-JY-A6FD-01;TCGA-JY-A6FE-01;TCGA-JY-A93F-01;TCGA-KH-A6WC-01;TCGA-L5-A43H-01;TCGA-L5-A4OM-01;TCGA-L5-A88S-01;TCGA-L5-A88W-01;TCGA-L5-A88Z-01;TCGA-L5-A8NQ-01;TCGA-L7-A56G-01;TCGA-LN-A49K-01;TCGA-LN-A49L-01;TCGA-LN-A49N-01…	TCGA-IG-A3QL-01;TCGA-IG-A3YA-01;TCGA-IG-A51D-01;TCGA-IG-A5S3-01;TCGA-IG-A6QS-01;TCGA-JY-A6FA-01;TCGA-JY-A6FG-01;TCGA-L5-A8NK-01;TCGA-LN-A49M-01;TCGA-LN-A49O-01;TCGA-LN-A49S-01;TCGA-LN-A4A1-01;TCGA-LN-A4A3-01;TCGA-LN-A7HZ-01;TCGA-LN-A8I0-01;TCGA-VR-A8EU-01;TCGA-VR-A8EW-01;TCGA-VR-A8EX-01	no_validation_or_external_data_used
outer	10	1		RNA_rank_activity	TCGA_Hallmark_RNA_rank_activity_C01v1	z_score	outer_training_samples_only	outer_validation_samples	72	20	TCGA-IG-A3I8-01;TCGA-IG-A3QL-01;TCGA-IG-A3YA-01;TCGA-IG-A3YB-01;TCGA-IG-A4P3-01;TCGA-IG-A4QT-01;TCGA-IG-A50L-01;TCGA-IG-A51D-01;TCGA-IG-A5B8-01;TCGA-IG-A6QS-01;TCGA-IG-A8O2-01;TCGA-IG-A97H-01;TCGA-JY-A6FA-01;TCGA-JY-A6FD-01;TCGA-JY-A6FE-01;TCGA-JY-A6FG-01;TCGA-KH-A6WC-01;TCGA-L5-A43H-01;TCGA-L5-A88S-01;TCGA-L5-A88W-01;TCGA-L5-A88Z-01;TCGA-L5-A8NK-01;TCGA-L5-A8NQ-01;TCGA-L7-A56G-01;TCGA-LN-A49K-01…	TCGA-IG-A3Y9-01;TCGA-IG-A5S3-01;TCGA-IG-A625-01;TCGA-IG-A97I-01;TCGA-JY-A93F-01;TCGA-L5-A4OM-01;TCGA-LN-A49L-01;TCGA-LN-A49N-01;TCGA-LN-A49R-01;TCGA-LN-A49W-01;TCGA-LN-A4A2-01;TCGA-LN-A4A6-01;TCGA-LN-A5U5-01;TCGA-LN-A5U6-01;TCGA-LN-A5U7-01;TCGA-LN-A9FQ-01;TCGA-LN-A9FR-01;TCGA-V5-A7RC-01;TCGA-VR-A8ET-01;TCGA-Z6-AAPN-01	no_validation_or_external_data_used
outer	10	1		CNV_abs_burden	TCGA_Hallmark_CNV_abs_burden_C01v1	z_score	outer_training_samples_only	outer_validation_samples	72	20	TCGA-IG-A3I8-01;TCGA-IG-A3QL-01;TCGA-IG-A3YA-01;TCGA-IG-A3YB-01;TCGA-IG-A4P3-01;TCGA-IG-A4QT-01;TCGA-IG-A50L-01;TCGA-IG-A51D-01;TCGA-IG-A5B8-01;TCGA-IG-A6QS-01;TCGA-IG-A8O2-01;TCGA-IG-A97H-01;TCGA-JY-A6FA-01;TCGA-JY-A6FD-01;TCGA-JY-A6FE-01;TCGA-JY-A6FG-01;TCGA-KH-A6WC-01;TCGA-L5-A43H-01;TCGA-L5-A88S-01;TCGA-L5-A88W-01;TCGA-L5-A88Z-01;TCGA-L5-A8NK-01;TCGA-L5-A8NQ-01;TCGA-L7-A56G-01;TCGA-LN-A49K-01…	TCGA-IG-A3Y9-01;TCGA-IG-A5S3-01;TCGA-IG-A625-01;TCGA-IG-A97I-01;TCGA-JY-A93F-01;TCGA-L5-A4OM-01;TCGA-LN-A49L-01;TCGA-LN-A49N-01;TCGA-LN-A49R-01;TCGA-LN-A49W-01;TCGA-LN-A4A2-01;TCGA-LN-A4A6-01;TCGA-LN-A5U5-01;TCGA-LN-A5U6-01;TCGA-LN-A5U7-01;TCGA-LN-A9FQ-01;TCGA-LN-A9FR-01;TCGA-V5-A7RC-01;TCGA-VR-A8ET-01;TCGA-Z6-AAPN-01	no_validation_or_external_data_used
outer	10	1		METH_promoter_state	TCGA_Hallmark_METH_promoter_state_C01v1	z_score	outer_training_samples_only	outer_validation_samples	72	20	TCGA-IG-A3I8-01;TCGA-IG-A3QL-01;TCGA-IG-A3YA-01;TCGA-IG-A3YB-01;TCGA-IG-A4P3-01;TCGA-IG-A4QT-01;TCGA-IG-A50L-01;TCGA-IG-A51D-01;TCGA-IG-A5B8-01;TCGA-IG-A6QS-01;TCGA-IG-A8O2-01;TCGA-IG-A97H-01;TCGA-JY-A6FA-01;TCGA-JY-A6FD-01;TCGA-JY-A6FE-01;TCGA-JY-A6FG-01;TCGA-KH-A6WC-01;TCGA-L5-A43H-01;TCGA-L5-A88S-01;TCGA-L5-A88W-01;TCGA-L5-A88Z-01;TCGA-L5-A8NK-01;TCGA-L5-A8NQ-01;TCGA-L7-A56G-01;TCGA-LN-A49K-01…	TCGA-IG-A3Y9-01;TCGA-IG-A5S3-01;TCGA-IG-A625-01;TCGA-IG-A97I-01;TCGA-JY-A93F-01;TCGA-L5-A4OM-01;TCGA-LN-A49L-01;TCGA-LN-A49N-01;TCGA-LN-A49R-01;TCGA-LN-A49W-01;TCGA-LN-A4A2-01;TCGA-LN-A4A6-01;TCGA-LN-A5U5-01;TCGA-LN-A5U6-01;TCGA-LN-A5U7-01;TCGA-LN-A9FQ-01;TCGA-LN-A9FR-01;TCGA-V5-A7RC-01;TCGA-VR-A8ET-01;TCGA-Z6-AAPN-01	no_validation_or_external_data_used
outer	10	2		RNA_rank_activity	TCGA_Hallmark_RNA_rank_activity_C01v1	z_score	outer_training_samples_only	outer_validation_samples	74	18	TCGA-IG-A3I8-01;TCGA-IG-A3Y9-01;TCGA-IG-A3YA-01;TCGA-IG-A4P3-01;TCGA-IG-A4QT-01;TCGA-IG-A51D-01;TCGA-IG-A5S3-01;TCGA-IG-A625-01;TCGA-IG-A6QS-01;TCGA-IG-A8O2-01;TCGA-IG-A97H-01;TCGA-IG-A97I-01;TCGA-JY-A6FA-01;TCGA-JY-A6FD-01;TCGA-JY-A6FE-01;TCGA-JY-A6FG-01;TCGA-JY-A93F-01;TCGA-KH-A6WC-01;TCGA-L5-A43H-01;TCGA-L5-A4OM-01;TCGA-L5-A88S-01;TCGA-L5-A88Z-01;TCGA-L5-A8NK-01;TCGA-L5-A8NQ-01;TCGA-L7-A56G-01…	TCGA-IG-A3QL-01;TCGA-IG-A3YB-01;TCGA-IG-A50L-01;TCGA-IG-A5B8-01;TCGA-L5-A88W-01;TCGA-LN-A49O-01;TCGA-LN-A49S-01;TCGA-LN-A49X-01;TCGA-LN-A4A5-01;TCGA-LN-A7HV-01;TCGA-LN-A7HY-01;TCGA-LN-A8I0-01;TCGA-LN-A8I1-01;TCGA-LN-A9FO-01;TCGA-VR-A8EU-01;TCGA-VR-A8EX-01;TCGA-VR-AA4G-01;TCGA-VR-AA7D-01	no_validation_or_external_data_used
outer	10	2		CNV_abs_burden	TCGA_Hallmark_CNV_abs_burden_C01v1	z_score	outer_training_samples_only	outer_validation_samples	74	18	TCGA-IG-A3I8-01;TCGA-IG-A3Y9-01;TCGA-IG-A3YA-01;TCGA-IG-A4P3-01;TCGA-IG-A4QT-01;TCGA-IG-A51D-01;TCGA-IG-A5S3-01;TCGA-IG-A625-01;TCGA-IG-A6QS-01;TCGA-IG-A8O2-01;TCGA-IG-A97H-01;TCGA-IG-A97I-01;TCGA-JY-A6FA-01;TCGA-JY-A6FD-01;TCGA-JY-A6FE-01;TCGA-JY-A6FG-01;TCGA-JY-A93F-01;TCGA-KH-A6WC-01;TCGA-L5-A43H-01;TCGA-L5-A4OM-01;TCGA-L5-A88S-01;TCGA-L5-A88Z-01;TCGA-L5-A8NK-01;TCGA-L5-A8NQ-01;TCGA-L7-A56G-01…	TCGA-IG-A3QL-01;TCGA-IG-A3YB-01;TCGA-IG-A50L-01;TCGA-IG-A5B8-01;TCGA-L5-A88W-01;TCGA-LN-A49O-01;TCGA-LN-A49S-01;TCGA-LN-A49X-01;TCGA-LN-A4A5-01;TCGA-LN-A7HV-01;TCGA-LN-A7HY-01;TCGA-LN-A8I0-01;TCGA-LN-A8I1-01;TCGA-LN-A9FO-01;TCGA-VR-A8EU-01;TCGA-VR-A8EX-01;TCGA-VR-AA4G-01;TCGA-VR-AA7D-01	no_validation_or_external_data_used
outer	10	2		METH_promoter_state	TCGA_Hallmark_METH_promoter_state_C01v1	z_score	outer_training_samples_only	outer_validation_samples	74	18	TCGA-IG-A3I8-01;TCGA-IG-A3Y9-01;TCGA-IG-A3YA-01;TCGA-IG-A4P3-01;TCGA-IG-A4QT-01;TCGA-IG-A51D-01;TCGA-IG-A5S3-01;TCGA-IG-A625-01;TCGA-IG-A6QS-01;TCGA-IG-A8O2-01;TCGA-IG-A97H-01;TCGA-IG-A97I-01;TCGA-JY-A6FA-01;TCGA-JY-A6FD-01;TCGA-JY-A6FE-01;TCGA-JY-A6FG-01;TCGA-JY-A93F-01;TCGA-KH-A6WC-01;TCGA-L5-A43H-01;TCGA-L5-A4OM-01;TCGA-L5-A88S-01;TCGA-L5-A88Z-01;TCGA-L5-A8NK-01;TCGA-L5-A8NQ-01;TCGA-L7-A56G-01…	TCGA-IG-A3QL-01;TCGA-IG-A3YB-01;TCGA-IG-A50L-01;TCGA-IG-A5B8-01;TCGA-L5-A88W-01;TCGA-LN-A49O-01;TCGA-LN-A49S-01;TCGA-LN-A49X-01;TCGA-LN-A4A5-01;TCGA-LN-A7HV-01;TCGA-LN-A7HY-01;TCGA-LN-A8I0-01;TCGA-LN-A8I1-01;TCGA-LN-A9FO-01;TCGA-VR-A8EU-01;TCGA-VR-A8EX-01;TCGA-VR-AA4G-01;TCGA-VR-AA7D-01	no_validation_or_external_data_used
outer	10	3		RNA_rank_activity	TCGA_Hallmark_RNA_rank_activity_C01v1	z_score	outer_training_samples_only	outer_validation_samples	74	18	TCGA-IG-A3QL-01;TCGA-IG-A3Y9-01;TCGA-IG-A3YB-01;TCGA-IG-A4P3-01;TCGA-IG-A4QT-01;TCGA-IG-A50L-01;TCGA-IG-A51D-01;TCGA-IG-A5B8-01;TCGA-IG-A5S3-01;TCGA-IG-A625-01;TCGA-IG-A6QS-01;TCGA-IG-A8O2-01;TCGA-IG-A97H-01;TCGA-IG-A97I-01;TCGA-JY-A6FD-01;TCGA-JY-A6FE-01;TCGA-JY-A93F-01;TCGA-KH-A6WC-01;TCGA-L5-A43H-01;TCGA-L5-A4OM-01;TCGA-L5-A88S-01;TCGA-L5-A88W-01;TCGA-L5-A8NK-01;TCGA-LN-A49K-01;TCGA-LN-A49L-01…	TCGA-IG-A3I8-01;TCGA-IG-A3YA-01;TCGA-JY-A6FA-01;TCGA-JY-A6FG-01;TCGA-L5-A88Z-01;TCGA-L5-A8NQ-01;TCGA-L7-A56G-01;TCGA-LN-A49U-01;TCGA-LN-A4MR-01;TCGA-LN-A8HZ-01;TCGA-LN-A9FP-01;TCGA-Q9-A6FU-01;TCGA-S8-A6BW-01;TCGA-V5-AASV-01;TCGA-VR-A8EY-01;TCGA-VR-A8EZ-01;TCGA-Z6-A8JD-01;TCGA-Z6-A8JE-01	no_validation_or_external_data_used
outer	10	3		CNV_abs_burden	TCGA_Hallmark_CNV_abs_burden_C01v1	z_score	outer_training_samples_only	outer_validation_samples	74	18	TCGA-IG-A3QL-01;TCGA-IG-A3Y9-01;TCGA-IG-A3YB-01;TCGA-IG-A4P3-01;TCGA-IG-A4QT-01;TCGA-IG-A50L-01;TCGA-IG-A51D-01;TCGA-IG-A5B8-01;TCGA-IG-A5S3-01;TCGA-IG-A625-01;TCGA-IG-A6QS-01;TCGA-IG-A8O2-01;TCGA-IG-A97H-01;TCGA-IG-A97I-01;TCGA-JY-A6FD-01;TCGA-JY-A6FE-01;TCGA-JY-A93F-01;TCGA-KH-A6WC-01;TCGA-L5-A43H-01;TCGA-L5-A4OM-01;TCGA-L5-A88S-01;TCGA-L5-A88W-01;TCGA-L5-A8NK-01;TCGA-LN-A49K-01;TCGA-LN-A49L-01…	TCGA-IG-A3I8-01;TCGA-IG-A3YA-01;TCGA-JY-A6FA-01;TCGA-JY-A6FG-01;TCGA-L5-A88Z-01;TCGA-L5-A8NQ-01;TCGA-L7-A56G-01;TCGA-LN-A49U-01;TCGA-LN-A4MR-01;TCGA-LN-A8HZ-01;TCGA-LN-A9FP-01;TCGA-Q9-A6FU-01;TCGA-S8-A6BW-01;TCGA-V5-AASV-01;TCGA-VR-A8EY-01;TCGA-VR-A8EZ-01;TCGA-Z6-A8JD-01;TCGA-Z6-A8JE-01	no_validation_or_external_data_used
outer	10	3		METH_promoter_state	TCGA_Hallmark_METH_promoter_state_C01v1	z_score	outer_training_samples_only	outer_validation_samples	74	18	TCGA-IG-A3QL-01;TCGA-IG-A3Y9-01;TCGA-IG-A3YB-01;TCGA-IG-A4P3-01;TCGA-IG-A4QT-01;TCGA-IG-A50L-01;TCGA-IG-A51D-01;TCGA-IG-A5B8-01;TCGA-IG-A5S3-01;TCGA-IG-A625-01;TCGA-IG-A6QS-01;TCGA-IG-A8O2-01;TCGA-IG-A97H-01;TCGA-IG-A97I-01;TCGA-JY-A6FD-01;TCGA-JY-A6FE-01;TCGA-JY-A93F-01;TCGA-KH-A6WC-01;TCGA-L5-A43H-01;TCGA-L5-A4OM-01;TCGA-L5-A88S-01;TCGA-L5-A88W-01;TCGA-L5-A8NK-01;TCGA-LN-A49K-01;TCGA-LN-A49L-01…	TCGA-IG-A3I8-01;TCGA-IG-A3YA-01;TCGA-JY-A6FA-01;TCGA-JY-A6FG-01;TCGA-L5-A88Z-01;TCGA-L5-A8NQ-01;TCGA-L7-A56G-01;TCGA-LN-A49U-01;TCGA-LN-A4MR-01;TCGA-LN-A8HZ-01;TCGA-LN-A9FP-01;TCGA-Q9-A6FU-01;TCGA-S8-A6BW-01;TCGA-V5-AASV-01;TCGA-VR-A8EY-01;TCGA-VR-A8EZ-01;TCGA-Z6-A8JD-01;TCGA-Z6-A8JE-01	no_validation_or_external_data_used
outer	10	4		RNA_rank_activity	TCGA_Hallmark_RNA_rank_activity_C01v1	z_score	outer_training_samples_only	outer_validation_samples	74	18	TCGA-IG-A3I8-01;TCGA-IG-A3QL-01;TCGA-IG-A3Y9-01;TCGA-IG-A3YA-01;TCGA-IG-A3YB-01;TCGA-IG-A4P3-01;TCGA-IG-A50L-01;TCGA-IG-A5B8-01;TCGA-IG-A5S3-01;TCGA-IG-A625-01;TCGA-IG-A8O2-01;TCGA-IG-A97H-01;TCGA-IG-A97I-01;TCGA-JY-A6FA-01;TCGA-JY-A6FD-01;TCGA-JY-A6FG-01;TCGA-JY-A93F-01;TCGA-L5-A43H-01;TCGA-L5-A4OM-01;TCGA-L5-A88W-01;TCGA-L5-A88Z-01;TCGA-L5-A8NK-01;TCGA-L5-A8NQ-01;TCGA-L7-A56G-01;TCGA-LN-A49L-01…	TCGA-IG-A4QT-01;TCGA-IG-A51D-01;TCGA-IG-A6QS-01;TCGA-JY-A6FE-01;TCGA-KH-A6WC-01;TCGA-L5-A88S-01;TCGA-LN-A49K-01;TCGA-LN-A49M-01;TCGA-LN-A49P-01;TCGA-LN-A49V-01;TCGA-LN-A49Y-01;TCGA-LN-A4A3-01;TCGA-LN-A4A9-01;TCGA-LN-A4MQ-01;TCGA-LN-A7HX-01;TCGA-LN-A7HZ-01;TCGA-VR-A8EP-01;TCGA-VR-AA7I-01	no_validation_or_external_data_used
outer	10	4		CNV_abs_burden	TCGA_Hallmark_CNV_abs_burden_C01v1	z_score	outer_training_samples_only	outer_validation_samples	74	18	TCGA-IG-A3I8-01;TCGA-IG-A3QL-01;TCGA-IG-A3Y9-01;TCGA-IG-A3YA-01;TCGA-IG-A3YB-01;TCGA-IG-A4P3-01;TCGA-IG-A50L-01;TCGA-IG-A5B8-01;TCGA-IG-A5S3-01;TCGA-IG-A625-01;TCGA-IG-A8O2-01;TCGA-IG-A97H-01;TCGA-IG-A97I-01;TCGA-JY-A6FA-01;TCGA-JY-A6FD-01;TCGA-JY-A6FG-01;TCGA-JY-A93F-01;TCGA-L5-A43H-01;TCGA-L5-A4OM-01;TCGA-L5-A88W-01;TCGA-L5-A88Z-01;TCGA-L5-A8NK-01;TCGA-L5-A8NQ-01;TCGA-L7-A56G-01;TCGA-LN-A49L-01…	TCGA-IG-A4QT-01;TCGA-IG-A51D-01;TCGA-IG-A6QS-01;TCGA-JY-A6FE-01;TCGA-KH-A6WC-01;TCGA-L5-A88S-01;TCGA-LN-A49K-01;TCGA-LN-A49M-01;TCGA-LN-A49P-01;TCGA-LN-A49V-01;TCGA-LN-A49Y-01;TCGA-LN-A4A3-01;TCGA-LN-A4A9-01;TCGA-LN-A4MQ-01;TCGA-LN-A7HX-01;TCGA-LN-A7HZ-01;TCGA-VR-A8EP-01;TCGA-VR-AA7I-01	no_validation_or_external_data_used
outer	10	4		METH_promoter_state	TCGA_Hallmark_METH_promoter_state_C01v1	z_score	outer_training_samples_only	outer_validation_samples	74	18	TCGA-IG-A3I8-01;TCGA-IG-A3QL-01;TCGA-IG-A3Y9-01;TCGA-IG-A3YA-01;TCGA-IG-A3YB-01;TCGA-IG-A4P3-01;TCGA-IG-A50L-01;TCGA-IG-A5B8-01;TCGA-IG-A5S3-01;TCGA-IG-A625-01;TCGA-IG-A8O2-01;TCGA-IG-A97H-01;TCGA-IG-A97I-01;TCGA-JY-A6FA-01;TCGA-JY-A6FD-01;TCGA-JY-A6FG-01;TCGA-JY-A93F-01;TCGA-L5-A43H-01;TCGA-L5-A4OM-01;TCGA-L5-A88W-01;TCGA-L5-A88Z-01;TCGA-L5-A8NK-01;TCGA-L5-A8NQ-01;TCGA-L7-A56G-01;TCGA-LN-A49L-01…	TCGA-IG-A4QT-01;TCGA-IG-A51D-01;TCGA-IG-A6QS-01;TCGA-JY-A6FE-01;TCGA-KH-A6WC-01;TCGA-L5-A88S-01;TCGA-LN-A49K-01;TCGA-LN-A49M-01;TCGA-LN-A49P-01;TCGA-LN-A49V-01;TCGA-LN-A49Y-01;TCGA-LN-A4A3-01;TCGA-LN-A4A9-01;TCGA-LN-A4MQ-01;TCGA-LN-A7HX-01;TCGA-LN-A7HZ-01;TCGA-VR-A8EP-01;TCGA-VR-AA7I-01	no_validation_or_external_data_used
outer	10	5		RNA_rank_activity	TCGA_Hallmark_RNA_rank_activity_C01v1	z_score	outer_training_samples_only	outer_validation_samples	74	18	TCGA-IG-A3I8-01;TCGA-IG-A3QL-01;TCGA-IG-A3Y9-01;TCGA-IG-A3YA-01;TCGA-IG-A3YB-01;TCGA-IG-A4QT-01;TCGA-IG-A50L-01;TCGA-IG-A51D-01;TCGA-IG-A5B8-01;TCGA-IG-A5S3-01;TCGA-IG-A625-01;TCGA-IG-A6QS-01;TCGA-IG-A97I-01;TCGA-JY-A6FA-01;TCGA-JY-A6FE-01;TCGA-JY-A6FG-01;TCGA-JY-A93F-01;TCGA-KH-A6WC-01;TCGA-L5-A4OM-01;TCGA-L5-A88S-01;TCGA-L5-A88W-01;TCGA-L5-A88Z-01;TCGA-L5-A8NQ-01;TCGA-L7-A56G-01;TCGA-LN-A49K-01…	TCGA-IG-A4P3-01;TCGA-IG-A8O2-01;TCGA-IG-A97H-01;TCGA-JY-A6FD-01;TCGA-L5-A43H-01;TCGA-L5-A8NK-01;TCGA-LN-A4A1-01;TCGA-LN-A4A4-01;TCGA-LN-A4A8-01;TCGA-LN-A7HW-01;TCGA-VR-A8EO-01;TCGA-VR-A8ER-01;TCGA-VR-A8EW-01;TCGA-VR-A8Q7-01;TCGA-VR-AA7B-01;TCGA-XP-A8T6-01;TCGA-XP-A8T8-01;TCGA-Z6-A9VB-01	no_validation_or_external_data_used
outer	10	5		CNV_abs_burden	TCGA_Hallmark_CNV_abs_burden_C01v1	z_score	outer_training_samples_only	outer_validation_samples	74	18	TCGA-IG-A3I8-01;TCGA-IG-A3QL-01;TCGA-IG-A3Y9-01;TCGA-IG-A3YA-01;TCGA-IG-A3YB-01;TCGA-IG-A4QT-01;TCGA-IG-A50L-01;TCGA-IG-A51D-01;TCGA-IG-A5B8-01;TCGA-IG-A5S3-01;TCGA-IG-A625-01;TCGA-IG-A6QS-01;TCGA-IG-A97I-01;TCGA-JY-A6FA-01;TCGA-JY-A6FE-01;TCGA-JY-A6FG-01;TCGA-JY-A93F-01;TCGA-KH-A6WC-01;TCGA-L5-A4OM-01;TCGA-L5-A88S-01;TCGA-L5-A88W-01;TCGA-L5-A88Z-01;TCGA-L5-A8NQ-01;TCGA-L7-A56G-01;TCGA-LN-A49K-01…	TCGA-IG-A4P3-01;TCGA-IG-A8O2-01;TCGA-IG-A97H-01;TCGA-JY-A6FD-01;TCGA-L5-A43H-01;TCGA-L5-A8NK-01;TCGA-LN-A4A1-01;TCGA-LN-A4A4-01;TCGA-LN-A4A8-01;TCGA-LN-A7HW-01;TCGA-VR-A8EO-01;TCGA-VR-A8ER-01;TCGA-VR-A8EW-01;TCGA-VR-A8Q7-01;TCGA-VR-AA7B-01;TCGA-XP-A8T6-01;TCGA-XP-A8T8-01;TCGA-Z6-A9VB-01	no_validation_or_external_data_used
outer	10	5		METH_promoter_state	TCGA_Hallmark_METH_promoter_state_C01v1	z_score	outer_training_samples_only	outer_validation_samples	74	18	TCGA-IG-A3I8-01;TCGA-IG-A3QL-01;TCGA-IG-A3Y9-01;TCGA-IG-A3YA-01;TCGA-IG-A3YB-01;TCGA-IG-A4QT-01;TCGA-IG-A50L-01;TCGA-IG-A51D-01;TCGA-IG-A5B8-01;TCGA-IG-A5S3-01;TCGA-IG-A625-01;TCGA-IG-A6QS-01;TCGA-IG-A97I-01;TCGA-JY-A6FA-01;TCGA-JY-A6FE-01;TCGA-JY-A6FG-01;TCGA-JY-A93F-01;TCGA-KH-A6WC-01;TCGA-L5-A4OM-01;TCGA-L5-A88S-01;TCGA-L5-A88W-01;TCGA-L5-A88Z-01;TCGA-L5-A8NQ-01;TCGA-L7-A56G-01;TCGA-LN-A49K-01…	TCGA-IG-A4P3-01;TCGA-IG-A8O2-01;TCGA-IG-A97H-01;TCGA-JY-A6FD-01;TCGA-L5-A43H-01;TCGA-L5-A8NK-01;TCGA-LN-A4A1-01;TCGA-LN-A4A4-01;TCGA-LN-A4A8-01;TCGA-LN-A7HW-01;TCGA-VR-A8EO-01;TCGA-VR-A8ER-01;TCGA-VR-A8EW-01;TCGA-VR-A8Q7-01;TCGA-VR-AA7B-01;TCGA-XP-A8T6-01;TCGA-XP-A8T8-01;TCGA-Z6-A9VB-01	no_validation_or_external_data_used
outer	11	1		RNA_rank_activity	TCGA_Hallmark_RNA_rank_activity_C01v1	z_score	outer_training_samples_only	outer_validation_samples	72	20	TCGA-IG-A3I8-01;TCGA-IG-A3QL-01;TCGA-IG-A3Y9-01;TCGA-IG-A4P3-01;TCGA-IG-A50L-01;TCGA-IG-A51D-01;TCGA-IG-A5B8-01;TCGA-IG-A5S3-01;TCGA-IG-A625-01;TCGA-IG-A6QS-01;TCGA-IG-A97H-01;TCGA-JY-A6FA-01;TCGA-JY-A6FD-01;TCGA-JY-A6FG-01;TCGA-JY-A93F-01;TCGA-KH-A6WC-01;TCGA-L5-A43H-01;TCGA-L5-A4OM-01;TCGA-L5-A88S-01;TCGA-L5-A88Z-01;TCGA-L5-A8NK-01;TCGA-L7-A56G-01;TCGA-LN-A49K-01;TCGA-LN-A49L-01;TCGA-LN-A49M-01…	TCGA-IG-A3YA-01;TCGA-IG-A3YB-01;TCGA-IG-A4QT-01;TCGA-IG-A8O2-01;TCGA-IG-A97I-01;TCGA-JY-A6FE-01;TCGA-L5-A88W-01;TCGA-L5-A8NQ-01;TCGA-LN-A49O-01;TCGA-LN-A49U-01;TCGA-LN-A4A3-01;TCGA-LN-A4A8-01;TCGA-LN-A7HY-01;TCGA-S8-A6BW-01;TCGA-VR-A8EZ-01;TCGA-VR-AA4G-01;TCGA-XP-A8T6-01;TCGA-XP-A8T8-01;TCGA-Z6-A9VB-01;TCGA-Z6-AAPN-01	no_validation_or_external_data_used
outer	11	1		CNV_abs_burden	TCGA_Hallmark_CNV_abs_burden_C01v1	z_score	outer_training_samples_only	outer_validation_samples	72	20	TCGA-IG-A3I8-01;TCGA-IG-A3QL-01;TCGA-IG-A3Y9-01;TCGA-IG-A4P3-01;TCGA-IG-A50L-01;TCGA-IG-A51D-01;TCGA-IG-A5B8-01;TCGA-IG-A5S3-01;TCGA-IG-A625-01;TCGA-IG-A6QS-01;TCGA-IG-A97H-01;TCGA-JY-A6FA-01;TCGA-JY-A6FD-01;TCGA-JY-A6FG-01;TCGA-JY-A93F-01;TCGA-KH-A6WC-01;TCGA-L5-A43H-01;TCGA-L5-A4OM-01;TCGA-L5-A88S-01;TCGA-L5-A88Z-01;TCGA-L5-A8NK-01;TCGA-L7-A56G-01;TCGA-LN-A49K-01;TCGA-LN-A49L-01;TCGA-LN-A49M-01…	TCGA-IG-A3YA-01;TCGA-IG-A3YB-01;TCGA-IG-A4QT-01;TCGA-IG-A8O2-01;TCGA-IG-A97I-01;TCGA-JY-A6FE-01;TCGA-L5-A88W-01;TCGA-L5-A8NQ-01;TCGA-LN-A49O-01;TCGA-LN-A49U-01;TCGA-LN-A4A3-01;TCGA-LN-A4A8-01;TCGA-LN-A7HY-01;TCGA-S8-A6BW-01;TCGA-VR-A8EZ-01;TCGA-VR-AA4G-01;TCGA-XP-A8T6-01;TCGA-XP-A8T8-01;TCGA-Z6-A9VB-01;TCGA-Z6-AAPN-01	no_validation_or_external_data_used
outer	11	1		METH_promoter_state	TCGA_Hallmark_METH_promoter_state_C01v1	z_score	outer_training_samples_only	outer_validation_samples	72	20	TCGA-IG-A3I8-01;TCGA-IG-A3QL-01;TCGA-IG-A3Y9-01;TCGA-IG-A4P3-01;TCGA-IG-A50L-01;TCGA-IG-A51D-01;TCGA-IG-A5B8-01;TCGA-IG-A5S3-01;TCGA-IG-A625-01;TCGA-IG-A6QS-01;TCGA-IG-A97H-01;TCGA-JY-A6FA-01;TCGA-JY-A6FD-01;TCGA-JY-A6FG-01;TCGA-JY-A93F-01;TCGA-KH-A6WC-01;TCGA-L5-A43H-01;TCGA-L5-A4OM-01;TCGA-L5-A88S-01;TCGA-L5-A88Z-01;TCGA-L5-A8NK-01;TCGA-L7-A56G-01;TCGA-LN-A49K-01;TCGA-LN-A49L-01;TCGA-LN-A49M-01…	TCGA-IG-A3YA-01;TCGA-IG-A3YB-01;TCGA-IG-A4QT-01;TCGA-IG-A8O2-01;TCGA-IG-A97I-01;TCGA-JY-A6FE-01;TCGA-L5-A88W-01;TCGA-L5-A8NQ-01;TCGA-LN-A49O-01;TCGA-LN-A49U-01;TCGA-LN-A4A3-01;TCGA-LN-A4A8-01;TCGA-LN-A7HY-01;TCGA-S8-A6BW-01;TCGA-VR-A8EZ-01;TCGA-VR-AA4G-01;TCGA-XP-A8T6-01;TCGA-XP-A8T8-01;TCGA-Z6-A9VB-01;TCGA-Z6-AAPN-01	no_validation_or_external_data_used
outer	11	2		RNA_rank_activity	TCGA_Hallmark_RNA_rank_activity_C01v1	z_score	outer_training_samples_only	outer_validation_samples	74	18	TCGA-IG-A3I8-01;TCGA-IG-A3QL-01;TCGA-IG-A3Y9-01;TCGA-IG-A3YA-01;TCGA-IG-A3YB-01;TCGA-IG-A4P3-01;TCGA-IG-A4QT-01;TCGA-IG-A50L-01;TCGA-IG-A51D-01;TCGA-IG-A5B8-01;TCGA-IG-A5S3-01;TCGA-IG-A625-01;TCGA-IG-A6QS-01;TCGA-IG-A8O2-01;TCGA-IG-A97H-01;TCGA-IG-A97I-01;TCGA-JY-A6FA-01;TCGA-JY-A6FE-01;TCGA-JY-A93F-01;TCGA-KH-A6WC-01;TCGA-L5-A43H-01;TCGA-L5-A4OM-01;TCGA-L5-A88W-01;TCGA-L5-A88Z-01;TCGA-L5-A8NK-01…	TCGA-JY-A6FD-01;TCGA-JY-A6FG-01;TCGA-L5-A88S-01;TCGA-L7-A56G-01;TCGA-LN-A49P-01;TCGA-LN-A49Y-01;TCGA-LN-A4A2-01;TCGA-LN-A4MQ-01;TCGA-LN-A7HW-01;TCGA-LN-A7HX-01;TCGA-LN-A9FP-01;TCGA-LN-A9FQ-01;TCGA-V5-A7RC-01;TCGA-V5-AASV-01;TCGA-VR-A8EU-01;TCGA-VR-A8EW-01;TCGA-VR-AA7I-01;TCGA-Z6-A8JD-01	no_validation_or_external_data_used
outer	11	2		CNV_abs_burden	TCGA_Hallmark_CNV_abs_burden_C01v1	z_score	outer_training_samples_only	outer_validation_samples	74	18	TCGA-IG-A3I8-01;TCGA-IG-A3QL-01;TCGA-IG-A3Y9-01;TCGA-IG-A3YA-01;TCGA-IG-A3YB-01;TCGA-IG-A4P3-01;TCGA-IG-A4QT-01;TCGA-IG-A50L-01;TCGA-IG-A51D-01;TCGA-IG-A5B8-01;TCGA-IG-A5S3-01;TCGA-IG-A625-01;TCGA-IG-A6QS-01;TCGA-IG-A8O2-01;TCGA-IG-A97H-01;TCGA-IG-A97I-01;TCGA-JY-A6FA-01;TCGA-JY-A6FE-01;TCGA-JY-A93F-01;TCGA-KH-A6WC-01;TCGA-L5-A43H-01;TCGA-L5-A4OM-01;TCGA-L5-A88W-01;TCGA-L5-A88Z-01;TCGA-L5-A8NK-01…	TCGA-JY-A6FD-01;TCGA-JY-A6FG-01;TCGA-L5-A88S-01;TCGA-L7-A56G-01;TCGA-LN-A49P-01;TCGA-LN-A49Y-01;TCGA-LN-A4A2-01;TCGA-LN-A4MQ-01;TCGA-LN-A7HW-01;TCGA-LN-A7HX-01;TCGA-LN-A9FP-01;TCGA-LN-A9FQ-01;TCGA-V5-A7RC-01;TCGA-V5-AASV-01;TCGA-VR-A8EU-01;TCGA-VR-A8EW-01;TCGA-VR-AA7I-01;TCGA-Z6-A8JD-01	no_validation_or_external_data_used
outer	11	2		METH_promoter_state	TCGA_Hallmark_METH_promoter_state_C01v1	z_score	outer_training_samples_only	outer_validation_samples	74	18	TCGA-IG-A3I8-01;TCGA-IG-A3QL-01;TCGA-IG-A3Y9-01;TCGA-IG-A3YA-01;TCGA-IG-A3YB-01;TCGA-IG-A4P3-01;TCGA-IG-A4QT-01;TCGA-IG-A50L-01;TCGA-IG-A51D-01;TCGA-IG-A5B8-01;TCGA-IG-A5S3-01;TCGA-IG-A625-01;TCGA-IG-A6QS-01;TCGA-IG-A8O2-01;TCGA-IG-A97H-01;TCGA-IG-A97I-01;TCGA-JY-A6FA-01;TCGA-JY-A6FE-01;TCGA-JY-A93F-01;TCGA-KH-A6WC-01;TCGA-L5-A43H-01;TCGA-L5-A4OM-01;TCGA-L5-A88W-01;TCGA-L5-A88Z-01;TCGA-L5-A8NK-01…	TCGA-JY-A6FD-01;TCGA-JY-A6FG-01;TCGA-L5-A88S-01;TCGA-L7-A56G-01;TCGA-LN-A49P-01;TCGA-LN-A49Y-01;TCGA-LN-A4A2-01;TCGA-LN-A4MQ-01;TCGA-LN-A7HW-01;TCGA-LN-A7HX-01;TCGA-LN-A9FP-01;TCGA-LN-A9FQ-01;TCGA-V5-A7RC-01;TCGA-V5-AASV-01;TCGA-VR-A8EU-01;TCGA-VR-A8EW-01;TCGA-VR-AA7I-01;TCGA-Z6-A8JD-01	no_validation_or_external_data_used
outer	11	3		RNA_rank_activity	TCGA_Hallmark_RNA_rank_activity_C01v1	z_score	outer_training_samples_only	outer_validation_samples	74	18	TCGA-IG-A3QL-01;TCGA-IG-A3YA-01;TCGA-IG-A3YB-01;TCGA-IG-A4P3-01;TCGA-IG-A4QT-01;TCGA-IG-A5B8-01;TCGA-IG-A5S3-01;TCGA-IG-A625-01;TCGA-IG-A8O2-01;TCGA-IG-A97H-01;TCGA-IG-A97I-01;TCGA-JY-A6FA-01;TCGA-JY-A6FD-01;TCGA-JY-A6FE-01;TCGA-JY-A6FG-01;TCGA-JY-A93F-01;TCGA-L5-A43H-01;TCGA-L5-A4OM-01;TCGA-L5-A88S-01;TCGA-L5-A88W-01;TCGA-L5-A8NQ-01;TCGA-L7-A56G-01;TCGA-LN-A49K-01;TCGA-LN-A49L-01;TCGA-LN-A49M-01…	TCGA-IG-A3I8-01;TCGA-IG-A3Y9-01;TCGA-IG-A50L-01;TCGA-IG-A51D-01;TCGA-IG-A6QS-01;TCGA-KH-A6WC-01;TCGA-L5-A88Z-01;TCGA-L5-A8NK-01;TCGA-LN-A49N-01;TCGA-LN-A49X-01;TCGA-LN-A4A4-01;TCGA-LN-A4MR-01;TCGA-LN-A5U5-01;TCGA-Q9-A6FU-01;TCGA-VR-A8EP-01;TCGA-VR-A8ER-01;TCGA-VR-AA7B-01;TCGA-VR-AA7D-01	no_validation_or_external_data_used
outer	11	3		CNV_abs_burden	TCGA_Hallmark_CNV_abs_burden_C01v1	z_score	outer_training_samples_only	outer_validation_samples	74	18	TCGA-IG-A3QL-01;TCGA-IG-A3YA-01;TCGA-IG-A3YB-01;TCGA-IG-A4P3-01;TCGA-IG-A4QT-01;TCGA-IG-A5B8-01;TCGA-IG-A5S3-01;TCGA-IG-A625-01;TCGA-IG-A8O2-01;TCGA-IG-A97H-01;TCGA-IG-A97I-01;TCGA-JY-A6FA-01;TCGA-JY-A6FD-01;TCGA-JY-A6FE-01;TCGA-JY-A6FG-01;TCGA-JY-A93F-01;TCGA-L5-A43H-01;TCGA-L5-A4OM-01;TCGA-L5-A88S-01;TCGA-L5-A88W-01;TCGA-L5-A8NQ-01;TCGA-L7-A56G-01;TCGA-LN-A49K-01;TCGA-LN-A49L-01;TCGA-LN-A49M-01…	TCGA-IG-A3I8-01;TCGA-IG-A3Y9-01;TCGA-IG-A50L-01;TCGA-IG-A51D-01;TCGA-IG-A6QS-01;TCGA-KH-A6WC-01;TCGA-L5-A88Z-01;TCGA-L5-A8NK-01;TCGA-LN-A49N-01;TCGA-LN-A49X-01;TCGA-LN-A4A4-01;TCGA-LN-A4MR-01;TCGA-LN-A5U5-01;TCGA-Q9-A6FU-01;TCGA-VR-A8EP-01;TCGA-VR-A8ER-01;TCGA-VR-AA7B-01;TCGA-VR-AA7D-01	no_validation_or_external_data_used
outer	11	3		METH_promoter_state	TCGA_Hallmark_METH_promoter_state_C01v1	z_score	outer_training_samples_only	outer_validation_samples	74	18	TCGA-IG-A3QL-01;TCGA-IG-A3YA-01;TCGA-IG-A3YB-01;TCGA-IG-A4P3-01;TCGA-IG-A4QT-01;TCGA-IG-A5B8-01;TCGA-IG-A5S3-01;TCGA-IG-A625-01;TCGA-IG-A8O2-01;TCGA-IG-A97H-01;TCGA-IG-A97I-01;TCGA-JY-A6FA-01;TCGA-JY-A6FD-01;TCGA-JY-A6FE-01;TCGA-JY-A6FG-01;TCGA-JY-A93F-01;TCGA-L5-A43H-01;TCGA-L5-A4OM-01;TCGA-L5-A88S-01;TCGA-L5-A88W-01;TCGA-L5-A8NQ-01;TCGA-L7-A56G-01;TCGA-LN-A49K-01;TCGA-LN-A49L-01;TCGA-LN-A49M-01…	TCGA-IG-A3I8-01;TCGA-IG-A3Y9-01;TCGA-IG-A50L-01;TCGA-IG-A51D-01;TCGA-IG-A6QS-01;TCGA-KH-A6WC-01;TCGA-L5-A88Z-01;TCGA-L5-A8NK-01;TCGA-LN-A49N-01;TCGA-LN-A49X-01;TCGA-LN-A4A4-01;TCGA-LN-A4MR-01;TCGA-LN-A5U5-01;TCGA-Q9-A6FU-01;TCGA-VR-A8EP-01;TCGA-VR-A8ER-01;TCGA-VR-AA7B-01;TCGA-VR-AA7D-01	no_validation_or_external_data_used
outer	11	4		RNA_rank_activity	TCGA_Hallmark_RNA_rank_activity_C01v1	z_score	outer_training_samples_only	outer_validation_samples	74	18	TCGA-IG-A3I8-01;TCGA-IG-A3QL-01;TCGA-IG-A3Y9-01;TCGA-IG-A3YA-01;TCGA-IG-A3YB-01;TCGA-IG-A4QT-01;TCGA-IG-A50L-01;TCGA-IG-A51D-01;TCGA-IG-A5S3-01;TCGA-IG-A6QS-01;TCGA-IG-A8O2-01;TCGA-IG-A97H-01;TCGA-IG-A97I-01;TCGA-JY-A6FA-01;TCGA-JY-A6FD-01;TCGA-JY-A6FE-01;TCGA-JY-A6FG-01;TCGA-JY-A93F-01;TCGA-KH-A6WC-01;TCGA-L5-A43H-01;TCGA-L5-A88S-01;TCGA-L5-A88W-01;TCGA-L5-A88Z-01;TCGA-L5-A8NK-01;TCGA-L5-A8NQ-01…	TCGA-IG-A4P3-01;TCGA-IG-A5B8-01;TCGA-IG-A625-01;TCGA-L5-A4OM-01;TCGA-LN-A49L-01;TCGA-LN-A49R-01;TCGA-LN-A49S-01;TCGA-LN-A49V-01;TCGA-LN-A4A1-01;TCGA-LN-A4A6-01;TCGA-LN-A7HZ-01;TCGA-LN-A8HZ-01;TCGA-LN-A8I0-01;TCGA-LN-A9FR-01;TCGA-VR-A8ET-01;TCGA-VR-A8EY-01;TCGA-VR-A8Q7-01;TCGA-Z6-A8JE-01	no_validation_or_external_data_used
outer	11	4		CNV_abs_burden	TCGA_Hallmark_CNV_abs_burden_C01v1	z_score	outer_training_samples_only	outer_validation_samples	74	18	TCGA-IG-A3I8-01;TCGA-IG-A3QL-01;TCGA-IG-A3Y9-01;TCGA-IG-A3YA-01;TCGA-IG-A3YB-01;TCGA-IG-A4QT-01;TCGA-IG-A50L-01;TCGA-IG-A51D-01;TCGA-IG-A5S3-01;TCGA-IG-A6QS-01;TCGA-IG-A8O2-01;TCGA-IG-A97H-01;TCGA-IG-A97I-01;TCGA-JY-A6FA-01;TCGA-JY-A6FD-01;TCGA-JY-A6FE-01;TCGA-JY-A6FG-01;TCGA-JY-A93F-01;TCGA-KH-A6WC-01;TCGA-L5-A43H-01;TCGA-L5-A88S-01;TCGA-L5-A88W-01;TCGA-L5-A88Z-01;TCGA-L5-A8NK-01;TCGA-L5-A8NQ-01…	TCGA-IG-A4P3-01;TCGA-IG-A5B8-01;TCGA-IG-A625-01;TCGA-L5-A4OM-01;TCGA-LN-A49L-01;TCGA-LN-A49R-01;TCGA-LN-A49S-01;TCGA-LN-A49V-01;TCGA-LN-A4A1-01;TCGA-LN-A4A6-01;TCGA-LN-A7HZ-01;TCGA-LN-A8HZ-01;TCGA-LN-A8I0-01;TCGA-LN-A9FR-01;TCGA-VR-A8ET-01;TCGA-VR-A8EY-01;TCGA-VR-A8Q7-01;TCGA-Z6-A8JE-01	no_validation_or_external_data_used
outer	11	4		METH_promoter_state	TCGA_Hallmark_METH_promoter_state_C01v1	z_score	outer_training_samples_only	outer_validation_samples	74	18	TCGA-IG-A3I8-01;TCGA-IG-A3QL-01;TCGA-IG-A3Y9-01;TCGA-IG-A3YA-01;TCGA-IG-A3YB-01;TCGA-IG-A4QT-01;TCGA-IG-A50L-01;TCGA-IG-A51D-01;TCGA-IG-A5S3-01;TCGA-IG-A6QS-01;TCGA-IG-A8O2-01;TCGA-IG-A97H-01;TCGA-IG-A97I-01;TCGA-JY-A6FA-01;TCGA-JY-A6FD-01;TCGA-JY-A6FE-01;TCGA-JY-A6FG-01;TCGA-JY-A93F-01;TCGA-KH-A6WC-01;TCGA-L5-A43H-01;TCGA-L5-A88S-01;TCGA-L5-A88W-01;TCGA-L5-A88Z-01;TCGA-L5-A8NK-01;TCGA-L5-A8NQ-01…	TCGA-IG-A4P3-01;TCGA-IG-A5B8-01;TCGA-IG-A625-01;TCGA-L5-A4OM-01;TCGA-LN-A49L-01;TCGA-LN-A49R-01;TCGA-LN-A49S-01;TCGA-LN-A49V-01;TCGA-LN-A4A1-01;TCGA-LN-A4A6-01;TCGA-LN-A7HZ-01;TCGA-LN-A8HZ-01;TCGA-LN-A8I0-01;TCGA-LN-A9FR-01;TCGA-VR-A8ET-01;TCGA-VR-A8EY-01;TCGA-VR-A8Q7-01;TCGA-Z6-A8JE-01	no_validation_or_external_data_used
outer	11	5		RNA_rank_activity	TCGA_Hallmark_RNA_rank_activity_C01v1	z_score	outer_training_samples_only	outer_validation_samples	74	18	TCGA-IG-A3I8-01;TCGA-IG-A3Y9-01;TCGA-IG-A3YA-01;TCGA-IG-A3YB-01;TCGA-IG-A4P3-01;TCGA-IG-A4QT-01;TCGA-IG-A50L-01;TCGA-IG-A51D-01;TCGA-IG-A5B8-01;TCGA-IG-A625-01;TCGA-IG-A6QS-01;TCGA-IG-A8O2-01;TCGA-IG-A97I-01;TCGA-JY-A6FD-01;TCGA-JY-A6FE-01;TCGA-JY-A6FG-01;TCGA-KH-A6WC-01;TCGA-L5-A4OM-01;TCGA-L5-A88S-01;TCGA-L5-A88W-01;TCGA-L5-A88Z-01;TCGA-L5-A8NK-01;TCGA-L5-A8NQ-01;TCGA-L7-A56G-01;TCGA-LN-A49L-01…	TCGA-IG-A3QL-01;TCGA-IG-A5S3-01;TCGA-IG-A97H-01;TCGA-JY-A6FA-01;TCGA-JY-A93F-01;TCGA-L5-A43H-01;TCGA-LN-A49K-01;TCGA-LN-A49M-01;TCGA-LN-A49W-01;TCGA-LN-A4A5-01;TCGA-LN-A4A9-01;TCGA-LN-A5U6-01;TCGA-LN-A5U7-01;TCGA-LN-A7HV-01;TCGA-LN-A8I1-01;TCGA-LN-A9FO-01;TCGA-VR-A8EO-01;TCGA-VR-A8EX-01	no_validation_or_external_data_used
outer	11	5		CNV_abs_burden	TCGA_Hallmark_CNV_abs_burden_C01v1	z_score	outer_training_samples_only	outer_validation_samples	74	18	TCGA-IG-A3I8-01;TCGA-IG-A3Y9-01;TCGA-IG-A3YA-01;TCGA-IG-A3YB-01;TCGA-IG-A4P3-01;TCGA-IG-A4QT-01;TCGA-IG-A50L-01;TCGA-IG-A51D-01;TCGA-IG-A5B8-01;TCGA-IG-A625-01;TCGA-IG-A6QS-01;TCGA-IG-A8O2-01;TCGA-IG-A97I-01;TCGA-JY-A6FD-01;TCGA-JY-A6FE-01;TCGA-JY-A6FG-01;TCGA-KH-A6WC-01;TCGA-L5-A4OM-01;TCGA-L5-A88S-01;TCGA-L5-A88W-01;TCGA-L5-A88Z-01;TCGA-L5-A8NK-01;TCGA-L5-A8NQ-01;TCGA-L7-A56G-01;TCGA-LN-A49L-01…	TCGA-IG-A3QL-01;TCGA-IG-A5S3-01;TCGA-IG-A97H-01;TCGA-JY-A6FA-01;TCGA-JY-A93F-01;TCGA-L5-A43H-01;TCGA-LN-A49K-01;TCGA-LN-A49M-01;TCGA-LN-A49W-01;TCGA-LN-A4A5-01;TCGA-LN-A4A9-01;TCGA-LN-A5U6-01;TCGA-LN-A5U7-01;TCGA-LN-A7HV-01;TCGA-LN-A8I1-01;TCGA-LN-A9FO-01;TCGA-VR-A8EO-01;TCGA-VR-A8EX-01	no_validation_or_external_data_used
outer	11	5		METH_promoter_state	TCGA_Hallmark_METH_promoter_state_C01v1	z_score	outer_training_samples_only	outer_validation_samples	74	18	TCGA-IG-A3I8-01;TCGA-IG-A3Y9-01;TCGA-IG-A3YA-01;TCGA-IG-A3YB-01;TCGA-IG-A4P3-01;TCGA-IG-A4QT-01;TCGA-IG-A50L-01;TCGA-IG-A51D-01;TCGA-IG-A5B8-01;TCGA-IG-A625-01;TCGA-IG-A6QS-01;TCGA-IG-A8O2-01;TCGA-IG-A97I-01;TCGA-JY-A6FD-01;TCGA-JY-A6FE-01;TCGA-JY-A6FG-01;TCGA-KH-A6WC-01;TCGA-L5-A4OM-01;TCGA-L5-A88S-01;TCGA-L5-A88W-01;TCGA-L5-A88Z-01;TCGA-L5-A8NK-01;TCGA-L5-A8NQ-01;TCGA-L7-A56G-01;TCGA-LN-A49L-01…	TCGA-IG-A3QL-01;TCGA-IG-A5S3-01;TCGA-IG-A97H-01;TCGA-JY-A6FA-01;TCGA-JY-A93F-01;TCGA-L5-A43H-01;TCGA-LN-A49K-01;TCGA-LN-A49M-01;TCGA-LN-A49W-01;TCGA-LN-A4A5-01;TCGA-LN-A4A9-01;TCGA-LN-A5U6-01;TCGA-LN-A5U7-01;TCGA-LN-A7HV-01;TCGA-LN-A8I1-01;TCGA-LN-A9FO-01;TCGA-VR-A8EO-01;TCGA-VR-A8EX-01	no_validation_or_external_data_used
outer	12	1		RNA_rank_activity	TCGA_Hallmark_RNA_rank_activity_C01v1	z_score	outer_training_samples_only	outer_validation_samples	72	20	TCGA-IG-A3QL-01;TCGA-IG-A3YA-01;TCGA-IG-A3YB-01;TCGA-IG-A4P3-01;TCGA-IG-A51D-01;TCGA-IG-A5B8-01;TCGA-IG-A625-01;TCGA-IG-A6QS-01;TCGA-IG-A8O2-01;TCGA-IG-A97H-01;TCGA-IG-A97I-01;TCGA-JY-A6FA-01;TCGA-JY-A93F-01;TCGA-KH-A6WC-01;TCGA-L5-A43H-01;TCGA-L5-A88W-01;TCGA-L5-A8NK-01;TCGA-L5-A8NQ-01;TCGA-L7-A56G-01;TCGA-LN-A49L-01;TCGA-LN-A49M-01;TCGA-LN-A49N-01;TCGA-LN-A49P-01;TCGA-LN-A49R-01;TCGA-LN-A49U-01…	TCGA-IG-A3I8-01;TCGA-IG-A3Y9-01;TCGA-IG-A4QT-01;TCGA-IG-A50L-01;TCGA-IG-A5S3-01;TCGA-JY-A6FD-01;TCGA-JY-A6FE-01;TCGA-JY-A6FG-01;TCGA-L5-A4OM-01;TCGA-L5-A88S-01;TCGA-L5-A88Z-01;TCGA-LN-A49K-01;TCGA-LN-A49O-01;TCGA-LN-A49S-01;TCGA-LN-A4A2-01;TCGA-LN-A4A5-01;TCGA-LN-A4MQ-01;TCGA-LN-A5U7-01;TCGA-LN-A8HZ-01;TCGA-Z6-A8JE-01	no_validation_or_external_data_used
outer	12	1		CNV_abs_burden	TCGA_Hallmark_CNV_abs_burden_C01v1	z_score	outer_training_samples_only	outer_validation_samples	72	20	TCGA-IG-A3QL-01;TCGA-IG-A3YA-01;TCGA-IG-A3YB-01;TCGA-IG-A4P3-01;TCGA-IG-A51D-01;TCGA-IG-A5B8-01;TCGA-IG-A625-01;TCGA-IG-A6QS-01;TCGA-IG-A8O2-01;TCGA-IG-A97H-01;TCGA-IG-A97I-01;TCGA-JY-A6FA-01;TCGA-JY-A93F-01;TCGA-KH-A6WC-01;TCGA-L5-A43H-01;TCGA-L5-A88W-01;TCGA-L5-A8NK-01;TCGA-L5-A8NQ-01;TCGA-L7-A56G-01;TCGA-LN-A49L-01;TCGA-LN-A49M-01;TCGA-LN-A49N-01;TCGA-LN-A49P-01;TCGA-LN-A49R-01;TCGA-LN-A49U-01…	TCGA-IG-A3I8-01;TCGA-IG-A3Y9-01;TCGA-IG-A4QT-01;TCGA-IG-A50L-01;TCGA-IG-A5S3-01;TCGA-JY-A6FD-01;TCGA-JY-A6FE-01;TCGA-JY-A6FG-01;TCGA-L5-A4OM-01;TCGA-L5-A88S-01;TCGA-L5-A88Z-01;TCGA-LN-A49K-01;TCGA-LN-A49O-01;TCGA-LN-A49S-01;TCGA-LN-A4A2-01;TCGA-LN-A4A5-01;TCGA-LN-A4MQ-01;TCGA-LN-A5U7-01;TCGA-LN-A8HZ-01;TCGA-Z6-A8JE-01	no_validation_or_external_data_used
outer	12	1		METH_promoter_state	TCGA_Hallmark_METH_promoter_state_C01v1	z_score	outer_training_samples_only	outer_validation_samples	72	20	TCGA-IG-A3QL-01;TCGA-IG-A3YA-01;TCGA-IG-A3YB-01;TCGA-IG-A4P3-01;TCGA-IG-A51D-01;TCGA-IG-A5B8-01;TCGA-IG-A625-01;TCGA-IG-A6QS-01;TCGA-IG-A8O2-01;TCGA-IG-A97H-01;TCGA-IG-A97I-01;TCGA-JY-A6FA-01;TCGA-JY-A93F-01;TCGA-KH-A6WC-01;TCGA-L5-A43H-01;TCGA-L5-A88W-01;TCGA-L5-A8NK-01;TCGA-L5-A8NQ-01;TCGA-L7-A56G-01;TCGA-LN-A49L-01;TCGA-LN-A49M-01;TCGA-LN-A49N-01;TCGA-LN-A49P-01;TCGA-LN-A49R-01;TCGA-LN-A49U-01…	TCGA-IG-A3I8-01;TCGA-IG-A3Y9-01;TCGA-IG-A4QT-01;TCGA-IG-A50L-01;TCGA-IG-A5S3-01;TCGA-JY-A6FD-01;TCGA-JY-A6FE-01;TCGA-JY-A6FG-01;TCGA-L5-A4OM-01;TCGA-L5-A88S-01;TCGA-L5-A88Z-01;TCGA-LN-A49K-01;TCGA-LN-A49O-01;TCGA-LN-A49S-01;TCGA-LN-A4A2-01;TCGA-LN-A4A5-01;TCGA-LN-A4MQ-01;TCGA-LN-A5U7-01;TCGA-LN-A8HZ-01;TCGA-Z6-A8JE-01	no_validation_or_external_data_used
outer	12	2		RNA_rank_activity	TCGA_Hallmark_RNA_rank_activity_C01v1	z_score	outer_training_samples_only	outer_validation_samples	74	18	TCGA-IG-A3I8-01;TCGA-IG-A3QL-01;TCGA-IG-A3Y9-01;TCGA-IG-A3YA-01;TCGA-IG-A3YB-01;TCGA-IG-A4QT-01;TCGA-IG-A50L-01;TCGA-IG-A51D-01;TCGA-IG-A5B8-01;TCGA-IG-A5S3-01;TCGA-IG-A6QS-01;TCGA-IG-A8O2-01;TCGA-IG-A97I-01;TCGA-JY-A6FA-01;TCGA-JY-A6FD-01;TCGA-JY-A6FE-01;TCGA-JY-A6FG-01;TCGA-KH-A6WC-01;TCGA-L5-A43H-01;TCGA-L5-A4OM-01;TCGA-L5-A88S-01;TCGA-L5-A88Z-01;TCGA-L5-A8NK-01;TCGA-L7-A56G-01;TCGA-LN-A49K-01…	TCGA-IG-A4P3-01;TCGA-IG-A625-01;TCGA-IG-A97H-01;TCGA-JY-A93F-01;TCGA-L5-A88W-01;TCGA-L5-A8NQ-01;TCGA-LN-A49P-01;TCGA-LN-A4A6-01;TCGA-LN-A4MR-01;TCGA-LN-A7HW-01;TCGA-LN-A7HX-01;TCGA-LN-A8I1-01;TCGA-LN-A9FO-01;TCGA-LN-A9FQ-01;TCGA-Q9-A6FU-01;TCGA-VR-AA4G-01;TCGA-VR-AA7I-01;TCGA-XP-A8T8-01	no_validation_or_external_data_used
outer	12	2		CNV_abs_burden	TCGA_Hallmark_CNV_abs_burden_C01v1	z_score	outer_training_samples_only	outer_validation_samples	74	18	TCGA-IG-A3I8-01;TCGA-IG-A3QL-01;TCGA-IG-A3Y9-01;TCGA-IG-A3YA-01;TCGA-IG-A3YB-01;TCGA-IG-A4QT-01;TCGA-IG-A50L-01;TCGA-IG-A51D-01;TCGA-IG-A5B8-01;TCGA-IG-A5S3-01;TCGA-IG-A6QS-01;TCGA-IG-A8O2-01;TCGA-IG-A97I-01;TCGA-JY-A6FA-01;TCGA-JY-A6FD-01;TCGA-JY-A6FE-01;TCGA-JY-A6FG-01;TCGA-KH-A6WC-01;TCGA-L5-A43H-01;TCGA-L5-A4OM-01;TCGA-L5-A88S-01;TCGA-L5-A88Z-01;TCGA-L5-A8NK-01;TCGA-L7-A56G-01;TCGA-LN-A49K-01…	TCGA-IG-A4P3-01;TCGA-IG-A625-01;TCGA-IG-A97H-01;TCGA-JY-A93F-01;TCGA-L5-A88W-01;TCGA-L5-A8NQ-01;TCGA-LN-A49P-01;TCGA-LN-A4A6-01;TCGA-LN-A4MR-01;TCGA-LN-A7HW-01;TCGA-LN-A7HX-01;TCGA-LN-A8I1-01;TCGA-LN-A9FO-01;TCGA-LN-A9FQ-01;TCGA-Q9-A6FU-01;TCGA-VR-AA4G-01;TCGA-VR-AA7I-01;TCGA-XP-A8T8-01	no_validation_or_external_data_used
outer	12	2		METH_promoter_state	TCGA_Hallmark_METH_promoter_state_C01v1	z_score	outer_training_samples_only	outer_validation_samples	74	18	TCGA-IG-A3I8-01;TCGA-IG-A3QL-01;TCGA-IG-A3Y9-01;TCGA-IG-A3YA-01;TCGA-IG-A3YB-01;TCGA-IG-A4QT-01;TCGA-IG-A50L-01;TCGA-IG-A51D-01;TCGA-IG-A5B8-01;TCGA-IG-A5S3-01;TCGA-IG-A6QS-01;TCGA-IG-A8O2-01;TCGA-IG-A97I-01;TCGA-JY-A6FA-01;TCGA-JY-A6FD-01;TCGA-JY-A6FE-01;TCGA-JY-A6FG-01;TCGA-KH-A6WC-01;TCGA-L5-A43H-01;TCGA-L5-A4OM-01;TCGA-L5-A88S-01;TCGA-L5-A88Z-01;TCGA-L5-A8NK-01;TCGA-L7-A56G-01;TCGA-LN-A49K-01…	TCGA-IG-A4P3-01;TCGA-IG-A625-01;TCGA-IG-A97H-01;TCGA-JY-A93F-01;TCGA-L5-A88W-01;TCGA-L5-A8NQ-01;TCGA-LN-A49P-01;TCGA-LN-A4A6-01;TCGA-LN-A4MR-01;TCGA-LN-A7HW-01;TCGA-LN-A7HX-01;TCGA-LN-A8I1-01;TCGA-LN-A9FO-01;TCGA-LN-A9FQ-01;TCGA-Q9-A6FU-01;TCGA-VR-AA4G-01;TCGA-VR-AA7I-01;TCGA-XP-A8T8-01	no_validation_or_external_data_used
outer	12	3		RNA_rank_activity	TCGA_Hallmark_RNA_rank_activity_C01v1	z_score	outer_training_samples_only	outer_validation_samples	74	18	TCGA-IG-A3I8-01;TCGA-IG-A3Y9-01;TCGA-IG-A3YA-01;TCGA-IG-A4P3-01;TCGA-IG-A4QT-01;TCGA-IG-A50L-01;TCGA-IG-A51D-01;TCGA-IG-A5S3-01;TCGA-IG-A625-01;TCGA-IG-A6QS-01;TCGA-IG-A97H-01;TCGA-IG-A97I-01;TCGA-JY-A6FA-01;TCGA-JY-A6FD-01;TCGA-JY-A6FE-01;TCGA-JY-A6FG-01;TCGA-JY-A93F-01;TCGA-KH-A6WC-01;TCGA-L5-A43H-01;TCGA-L5-A4OM-01;TCGA-L5-A88S-01;TCGA-L5-A88W-01;TCGA-L5-A88Z-01;TCGA-L5-A8NK-01;TCGA-L5-A8NQ-01…	TCGA-IG-A3QL-01;TCGA-IG-A3YB-01;TCGA-IG-A5B8-01;TCGA-IG-A8O2-01;TCGA-LN-A49R-01;TCGA-LN-A49U-01;TCGA-LN-A4A9-01;TCGA-LN-A7HY-01;TCGA-LN-A8I0-01;TCGA-LN-A9FP-01;TCGA-V5-A7RC-01;TCGA-VR-A8EP-01;TCGA-VR-A8ER-01;TCGA-VR-A8Q7-01;TCGA-VR-AA7D-01;TCGA-Z6-A8JD-01;TCGA-Z6-A9VB-01;TCGA-Z6-AAPN-01	no_validation_or_external_data_used
outer	12	3		CNV_abs_burden	TCGA_Hallmark_CNV_abs_burden_C01v1	z_score	outer_training_samples_only	outer_validation_samples	74	18	TCGA-IG-A3I8-01;TCGA-IG-A3Y9-01;TCGA-IG-A3YA-01;TCGA-IG-A4P3-01;TCGA-IG-A4QT-01;TCGA-IG-A50L-01;TCGA-IG-A51D-01;TCGA-IG-A5S3-01;TCGA-IG-A625-01;TCGA-IG-A6QS-01;TCGA-IG-A97H-01;TCGA-IG-A97I-01;TCGA-JY-A6FA-01;TCGA-JY-A6FD-01;TCGA-JY-A6FE-01;TCGA-JY-A6FG-01;TCGA-JY-A93F-01;TCGA-KH-A6WC-01;TCGA-L5-A43H-01;TCGA-L5-A4OM-01;TCGA-L5-A88S-01;TCGA-L5-A88W-01;TCGA-L5-A88Z-01;TCGA-L5-A8NK-01;TCGA-L5-A8NQ-01…	TCGA-IG-A3QL-01;TCGA-IG-A3YB-01;TCGA-IG-A5B8-01;TCGA-IG-A8O2-01;TCGA-LN-A49R-01;TCGA-LN-A49U-01;TCGA-LN-A4A9-01;TCGA-LN-A7HY-01;TCGA-LN-A8I0-01;TCGA-LN-A9FP-01;TCGA-V5-A7RC-01;TCGA-VR-A8EP-01;TCGA-VR-A8ER-01;TCGA-VR-A8Q7-01;TCGA-VR-AA7D-01;TCGA-Z6-A8JD-01;TCGA-Z6-A9VB-01;TCGA-Z6-AAPN-01	no_validation_or_external_data_used
outer	12	3		METH_promoter_state	TCGA_Hallmark_METH_promoter_state_C01v1	z_score	outer_training_samples_only	outer_validation_samples	74	18	TCGA-IG-A3I8-01;TCGA-IG-A3Y9-01;TCGA-IG-A3YA-01;TCGA-IG-A4P3-01;TCGA-IG-A4QT-01;TCGA-IG-A50L-01;TCGA-IG-A51D-01;TCGA-IG-A5S3-01;TCGA-IG-A625-01;TCGA-IG-A6QS-01;TCGA-IG-A97H-01;TCGA-IG-A97I-01;TCGA-JY-A6FA-01;TCGA-JY-A6FD-01;TCGA-JY-A6FE-01;TCGA-JY-A6FG-01;TCGA-JY-A93F-01;TCGA-KH-A6WC-01;TCGA-L5-A43H-01;TCGA-L5-A4OM-01;TCGA-L5-A88S-01;TCGA-L5-A88W-01;TCGA-L5-A88Z-01;TCGA-L5-A8NK-01;TCGA-L5-A8NQ-01…	TCGA-IG-A3QL-01;TCGA-IG-A3YB-01;TCGA-IG-A5B8-01;TCGA-IG-A8O2-01;TCGA-LN-A49R-01;TCGA-LN-A49U-01;TCGA-LN-A4A9-01;TCGA-LN-A7HY-01;TCGA-LN-A8I0-01;TCGA-LN-A9FP-01;TCGA-V5-A7RC-01;TCGA-VR-A8EP-01;TCGA-VR-A8ER-01;TCGA-VR-A8Q7-01;TCGA-VR-AA7D-01;TCGA-Z6-A8JD-01;TCGA-Z6-A9VB-01;TCGA-Z6-AAPN-01	no_validation_or_external_data_used
outer	12	4		RNA_rank_activity	TCGA_Hallmark_RNA_rank_activity_C01v1	z_score	outer_training_samples_only	outer_validation_samples	74	18	TCGA-IG-A3I8-01;TCGA-IG-A3QL-01;TCGA-IG-A3Y9-01;TCGA-IG-A3YB-01;TCGA-IG-A4P3-01;TCGA-IG-A4QT-01;TCGA-IG-A50L-01;TCGA-IG-A5B8-01;TCGA-IG-A5S3-01;TCGA-IG-A625-01;TCGA-IG-A8O2-01;TCGA-IG-A97H-01;TCGA-IG-A97I-01;TCGA-JY-A6FD-01;TCGA-JY-A6FE-01;TCGA-JY-A6FG-01;TCGA-JY-A93F-01;TCGA-KH-A6WC-01;TCGA-L5-A43H-01;TCGA-L5-A4OM-01;TCGA-L5-A88S-01;TCGA-L5-A88W-01;TCGA-L5-A88Z-01;TCGA-L5-A8NK-01;TCGA-L5-A8NQ-01…	TCGA-IG-A3YA-01;TCGA-IG-A51D-01;TCGA-IG-A6QS-01;TCGA-JY-A6FA-01;TCGA-LN-A49L-01;TCGA-LN-A49V-01;TCGA-LN-A49Y-01;TCGA-LN-A4A1-01;TCGA-LN-A4A8-01;TCGA-LN-A5U6-01;TCGA-LN-A7HZ-01;TCGA-LN-A9FR-01;TCGA-S8-A6BW-01;TCGA-VR-A8EO-01;TCGA-VR-A8ET-01;TCGA-VR-A8EX-01;TCGA-VR-A8EY-01;TCGA-XP-A8T6-01	no_validation_or_external_data_used
outer	12	4		CNV_abs_burden	TCGA_Hallmark_CNV_abs_burden_C01v1	z_score	outer_training_samples_only	outer_validation_samples	74	18	TCGA-IG-A3I8-01;TCGA-IG-A3QL-01;TCGA-IG-A3Y9-01;TCGA-IG-A3YB-01;TCGA-IG-A4P3-01;TCGA-IG-A4QT-01;TCGA-IG-A50L-01;TCGA-IG-A5B8-01;TCGA-IG-A5S3-01;TCGA-IG-A625-01;TCGA-IG-A8O2-01;TCGA-IG-A97H-01;TCGA-IG-A97I-01;TCGA-JY-A6FD-01;TCGA-JY-A6FE-01;TCGA-JY-A6FG-01;TCGA-JY-A93F-01;TCGA-KH-A6WC-01;TCGA-L5-A43H-01;TCGA-L5-A4OM-01;TCGA-L5-A88S-01;TCGA-L5-A88W-01;TCGA-L5-A88Z-01;TCGA-L5-A8NK-01;TCGA-L5-A8NQ-01…	TCGA-IG-A3YA-01;TCGA-IG-A51D-01;TCGA-IG-A6QS-01;TCGA-JY-A6FA-01;TCGA-LN-A49L-01;TCGA-LN-A49V-01;TCGA-LN-A49Y-01;TCGA-LN-A4A1-01;TCGA-LN-A4A8-01;TCGA-LN-A5U6-01;TCGA-LN-A7HZ-01;TCGA-LN-A9FR-01;TCGA-S8-A6BW-01;TCGA-VR-A8EO-01;TCGA-VR-A8ET-01;TCGA-VR-A8EX-01;TCGA-VR-A8EY-01;TCGA-XP-A8T6-01	no_validation_or_external_data_used
outer	12	4		METH_promoter_state	TCGA_Hallmark_METH_promoter_state_C01v1	z_score	outer_training_samples_only	outer_validation_samples	74	18	TCGA-IG-A3I8-01;TCGA-IG-A3QL-01;TCGA-IG-A3Y9-01;TCGA-IG-A3YB-01;TCGA-IG-A4P3-01;TCGA-IG-A4QT-01;TCGA-IG-A50L-01;TCGA-IG-A5B8-01;TCGA-IG-A5S3-01;TCGA-IG-A625-01;TCGA-IG-A8O2-01;TCGA-IG-A97H-01;TCGA-IG-A97I-01;TCGA-JY-A6FD-01;TCGA-JY-A6FE-01;TCGA-JY-A6FG-01;TCGA-JY-A93F-01;TCGA-KH-A6WC-01;TCGA-L5-A43H-01;TCGA-L5-A4OM-01;TCGA-L5-A88S-01;TCGA-L5-A88W-01;TCGA-L5-A88Z-01;TCGA-L5-A8NK-01;TCGA-L5-A8NQ-01…	TCGA-IG-A3YA-01;TCGA-IG-A51D-01;TCGA-IG-A6QS-01;TCGA-JY-A6FA-01;TCGA-LN-A49L-01;TCGA-LN-A49V-01;TCGA-LN-A49Y-01;TCGA-LN-A4A1-01;TCGA-LN-A4A8-01;TCGA-LN-A5U6-01;TCGA-LN-A7HZ-01;TCGA-LN-A9FR-01;TCGA-S8-A6BW-01;TCGA-VR-A8EO-01;TCGA-VR-A8ET-01;TCGA-VR-A8EX-01;TCGA-VR-A8EY-01;TCGA-XP-A8T6-01	no_validation_or_external_data_used
outer	12	5		RNA_rank_activity	TCGA_Hallmark_RNA_rank_activity_C01v1	z_score	outer_training_samples_only	outer_validation_samples	74	18	TCGA-IG-A3I8-01;TCGA-IG-A3QL-01;TCGA-IG-A3Y9-01;TCGA-IG-A3YA-01;TCGA-IG-A3YB-01;TCGA-IG-A4P3-01;TCGA-IG-A4QT-01;TCGA-IG-A50L-01;TCGA-IG-A51D-01;TCGA-IG-A5B8-01;TCGA-IG-A5S3-01;TCGA-IG-A625-01;TCGA-IG-A6QS-01;TCGA-IG-A8O2-01;TCGA-IG-A97H-01;TCGA-JY-A6FA-01;TCGA-JY-A6FD-01;TCGA-JY-A6FE-01;TCGA-JY-A6FG-01;TCGA-JY-A93F-01;TCGA-L5-A4OM-01;TCGA-L5-A88S-01;TCGA-L5-A88W-01;TCGA-L5-A88Z-01;TCGA-L5-A8NQ-01…	TCGA-IG-A97I-01;TCGA-KH-A6WC-01;TCGA-L5-A43H-01;TCGA-L5-A8NK-01;TCGA-L7-A56G-01;TCGA-LN-A49M-01;TCGA-LN-A49N-01;TCGA-LN-A49W-01;TCGA-LN-A49X-01;TCGA-LN-A4A3-01;TCGA-LN-A4A4-01;TCGA-LN-A5U5-01;TCGA-LN-A7HV-01;TCGA-V5-AASV-01;TCGA-VR-A8EU-01;TCGA-VR-A8EW-01;TCGA-VR-A8EZ-01;TCGA-VR-AA7B-01	no_validation_or_external_data_used
outer	12	5		CNV_abs_burden	TCGA_Hallmark_CNV_abs_burden_C01v1	z_score	outer_training_samples_only	outer_validation_samples	74	18	TCGA-IG-A3I8-01;TCGA-IG-A3QL-01;TCGA-IG-A3Y9-01;TCGA-IG-A3YA-01;TCGA-IG-A3YB-01;TCGA-IG-A4P3-01;TCGA-IG-A4QT-01;TCGA-IG-A50L-01;TCGA-IG-A51D-01;TCGA-IG-A5B8-01;TCGA-IG-A5S3-01;TCGA-IG-A625-01;TCGA-IG-A6QS-01;TCGA-IG-A8O2-01;TCGA-IG-A97H-01;TCGA-JY-A6FA-01;TCGA-JY-A6FD-01;TCGA-JY-A6FE-01;TCGA-JY-A6FG-01;TCGA-JY-A93F-01;TCGA-L5-A4OM-01;TCGA-L5-A88S-01;TCGA-L5-A88W-01;TCGA-L5-A88Z-01;TCGA-L5-A8NQ-01…	TCGA-IG-A97I-01;TCGA-KH-A6WC-01;TCGA-L5-A43H-01;TCGA-L5-A8NK-01;TCGA-L7-A56G-01;TCGA-LN-A49M-01;TCGA-LN-A49N-01;TCGA-LN-A49W-01;TCGA-LN-A49X-01;TCGA-LN-A4A3-01;TCGA-LN-A4A4-01;TCGA-LN-A5U5-01;TCGA-LN-A7HV-01;TCGA-V5-AASV-01;TCGA-VR-A8EU-01;TCGA-VR-A8EW-01;TCGA-VR-A8EZ-01;TCGA-VR-AA7B-01	no_validation_or_external_data_used
outer	12	5		METH_promoter_state	TCGA_Hallmark_METH_promoter_state_C01v1	z_score	outer_training_samples_only	outer_validation_samples	74	18	TCGA-IG-A3I8-01;TCGA-IG-A3QL-01;TCGA-IG-A3Y9-01;TCGA-IG-A3YA-01;TCGA-IG-A3YB-01;TCGA-IG-A4P3-01;TCGA-IG-A4QT-01;TCGA-IG-A50L-01;TCGA-IG-A51D-01;TCGA-IG-A5B8-01;TCGA-IG-A5S3-01;TCGA-IG-A625-01;TCGA-IG-A6QS-01;TCGA-IG-A8O2-01;TCGA-IG-A97H-01;TCGA-JY-A6FA-01;TCGA-JY-A6FD-01;TCGA-JY-A6FE-01;TCGA-JY-A6FG-01;TCGA-JY-A93F-01;TCGA-L5-A4OM-01;TCGA-L5-A88S-01;TCGA-L5-A88W-01;TCGA-L5-A88Z-01;TCGA-L5-A8NQ-01…	TCGA-IG-A97I-01;TCGA-KH-A6WC-01;TCGA-L5-A43H-01;TCGA-L5-A8NK-01;TCGA-L7-A56G-01;TCGA-LN-A49M-01;TCGA-LN-A49N-01;TCGA-LN-A49W-01;TCGA-LN-A49X-01;TCGA-LN-A4A3-01;TCGA-LN-A4A4-01;TCGA-LN-A5U5-01;TCGA-LN-A7HV-01;TCGA-V5-AASV-01;TCGA-VR-A8EU-01;TCGA-VR-A8EW-01;TCGA-VR-A8EZ-01;TCGA-VR-AA7B-01	no_validation_or_external_data_used
outer	13	1		RNA_rank_activity	TCGA_Hallmark_RNA_rank_activity_C01v1	z_score	outer_training_samples_only	outer_validation_samples	72	20	TCGA-IG-A3I8-01;TCGA-IG-A3QL-01;TCGA-IG-A3Y9-01;TCGA-IG-A3YA-01;TCGA-IG-A3YB-01;TCGA-IG-A4P3-01;TCGA-IG-A4QT-01;TCGA-IG-A50L-01;TCGA-IG-A51D-01;TCGA-IG-A625-01;TCGA-IG-A6QS-01;TCGA-IG-A8O2-01;TCGA-IG-A97H-01;TCGA-IG-A97I-01;TCGA-JY-A6FD-01;TCGA-JY-A6FE-01;TCGA-JY-A6FG-01;TCGA-JY-A93F-01;TCGA-KH-A6WC-01;TCGA-L5-A43H-01;TCGA-L5-A4OM-01;TCGA-L5-A88S-01;TCGA-L5-A88W-01;TCGA-L5-A88Z-01;TCGA-L5-A8NK-01…	TCGA-IG-A5B8-01;TCGA-IG-A5S3-01;TCGA-JY-A6FA-01;TCGA-L5-A8NQ-01;TCGA-LN-A49N-01;TCGA-LN-A49O-01;TCGA-LN-A49P-01;TCGA-LN-A49R-01;TCGA-LN-A49V-01;TCGA-LN-A4A3-01;TCGA-LN-A4A4-01;TCGA-LN-A7HV-01;TCGA-LN-A7HX-01;TCGA-S8-A6BW-01;TCGA-V5-A7RC-01;TCGA-VR-A8EU-01;TCGA-VR-A8EZ-01;TCGA-VR-AA4G-01;TCGA-XP-A8T6-01;TCGA-Z6-A8JE-01	no_validation_or_external_data_used
outer	13	1		CNV_abs_burden	TCGA_Hallmark_CNV_abs_burden_C01v1	z_score	outer_training_samples_only	outer_validation_samples	72	20	TCGA-IG-A3I8-01;TCGA-IG-A3QL-01;TCGA-IG-A3Y9-01;TCGA-IG-A3YA-01;TCGA-IG-A3YB-01;TCGA-IG-A4P3-01;TCGA-IG-A4QT-01;TCGA-IG-A50L-01;TCGA-IG-A51D-01;TCGA-IG-A625-01;TCGA-IG-A6QS-01;TCGA-IG-A8O2-01;TCGA-IG-A97H-01;TCGA-IG-A97I-01;TCGA-JY-A6FD-01;TCGA-JY-A6FE-01;TCGA-JY-A6FG-01;TCGA-JY-A93F-01;TCGA-KH-A6WC-01;TCGA-L5-A43H-01;TCGA-L5-A4OM-01;TCGA-L5-A88S-01;TCGA-L5-A88W-01;TCGA-L5-A88Z-01;TCGA-L5-A8NK-01…	TCGA-IG-A5B8-01;TCGA-IG-A5S3-01;TCGA-JY-A6FA-01;TCGA-L5-A8NQ-01;TCGA-LN-A49N-01;TCGA-LN-A49O-01;TCGA-LN-A49P-01;TCGA-LN-A49R-01;TCGA-LN-A49V-01;TCGA-LN-A4A3-01;TCGA-LN-A4A4-01;TCGA-LN-A7HV-01;TCGA-LN-A7HX-01;TCGA-S8-A6BW-01;TCGA-V5-A7RC-01;TCGA-VR-A8EU-01;TCGA-VR-A8EZ-01;TCGA-VR-AA4G-01;TCGA-XP-A8T6-01;TCGA-Z6-A8JE-01	no_validation_or_external_data_used
outer	13	1		METH_promoter_state	TCGA_Hallmark_METH_promoter_state_C01v1	z_score	outer_training_samples_only	outer_validation_samples	72	20	TCGA-IG-A3I8-01;TCGA-IG-A3QL-01;TCGA-IG-A3Y9-01;TCGA-IG-A3YA-01;TCGA-IG-A3YB-01;TCGA-IG-A4P3-01;TCGA-IG-A4QT-01;TCGA-IG-A50L-01;TCGA-IG-A51D-01;TCGA-IG-A625-01;TCGA-IG-A6QS-01;TCGA-IG-A8O2-01;TCGA-IG-A97H-01;TCGA-IG-A97I-01;TCGA-JY-A6FD-01;TCGA-JY-A6FE-01;TCGA-JY-A6FG-01;TCGA-JY-A93F-01;TCGA-KH-A6WC-01;TCGA-L5-A43H-01;TCGA-L5-A4OM-01;TCGA-L5-A88S-01;TCGA-L5-A88W-01;TCGA-L5-A88Z-01;TCGA-L5-A8NK-01…	TCGA-IG-A5B8-01;TCGA-IG-A5S3-01;TCGA-JY-A6FA-01;TCGA-L5-A8NQ-01;TCGA-LN-A49N-01;TCGA-LN-A49O-01;TCGA-LN-A49P-01;TCGA-LN-A49R-01;TCGA-LN-A49V-01;TCGA-LN-A4A3-01;TCGA-LN-A4A4-01;TCGA-LN-A7HV-01;TCGA-LN-A7HX-01;TCGA-S8-A6BW-01;TCGA-V5-A7RC-01;TCGA-VR-A8EU-01;TCGA-VR-A8EZ-01;TCGA-VR-AA4G-01;TCGA-XP-A8T6-01;TCGA-Z6-A8JE-01	no_validation_or_external_data_used
outer	13	2		RNA_rank_activity	TCGA_Hallmark_RNA_rank_activity_C01v1	z_score	outer_training_samples_only	outer_validation_samples	74	18	TCGA-IG-A3I8-01;TCGA-IG-A3QL-01;TCGA-IG-A3YB-01;TCGA-IG-A4P3-01;TCGA-IG-A4QT-01;TCGA-IG-A50L-01;TCGA-IG-A51D-01;TCGA-IG-A5B8-01;TCGA-IG-A5S3-01;TCGA-IG-A625-01;TCGA-IG-A6QS-01;TCGA-IG-A8O2-01;TCGA-IG-A97H-01;TCGA-IG-A97I-01;TCGA-JY-A6FA-01;TCGA-JY-A6FD-01;TCGA-JY-A6FG-01;TCGA-JY-A93F-01;TCGA-KH-A6WC-01;TCGA-L5-A43H-01;TCGA-L5-A4OM-01;TCGA-L5-A88W-01;TCGA-L5-A8NK-01;TCGA-L5-A8NQ-01;TCGA-L7-A56G-01…	TCGA-IG-A3Y9-01;TCGA-IG-A3YA-01;TCGA-JY-A6FE-01;TCGA-L5-A88S-01;TCGA-L5-A88Z-01;TCGA-LN-A49M-01;TCGA-LN-A49W-01;TCGA-LN-A49X-01;TCGA-LN-A4A2-01;TCGA-LN-A4MR-01;TCGA-LN-A5U5-01;TCGA-LN-A7HY-01;TCGA-LN-A8I0-01;TCGA-VR-A8ER-01;TCGA-VR-A8EW-01;TCGA-VR-A8EX-01;TCGA-VR-AA7B-01;TCGA-Z6-AAPN-01	no_validation_or_external_data_used
outer	13	2		CNV_abs_burden	TCGA_Hallmark_CNV_abs_burden_C01v1	z_score	outer_training_samples_only	outer_validation_samples	74	18	TCGA-IG-A3I8-01;TCGA-IG-A3QL-01;TCGA-IG-A3YB-01;TCGA-IG-A4P3-01;TCGA-IG-A4QT-01;TCGA-IG-A50L-01;TCGA-IG-A51D-01;TCGA-IG-A5B8-01;TCGA-IG-A5S3-01;TCGA-IG-A625-01;TCGA-IG-A6QS-01;TCGA-IG-A8O2-01;TCGA-IG-A97H-01;TCGA-IG-A97I-01;TCGA-JY-A6FA-01;TCGA-JY-A6FD-01;TCGA-JY-A6FG-01;TCGA-JY-A93F-01;TCGA-KH-A6WC-01;TCGA-L5-A43H-01;TCGA-L5-A4OM-01;TCGA-L5-A88W-01;TCGA-L5-A8NK-01;TCGA-L5-A8NQ-01;TCGA-L7-A56G-01…	TCGA-IG-A3Y9-01;TCGA-IG-A3YA-01;TCGA-JY-A6FE-01;TCGA-L5-A88S-01;TCGA-L5-A88Z-01;TCGA-LN-A49M-01;TCGA-LN-A49W-01;TCGA-LN-A49X-01;TCGA-LN-A4A2-01;TCGA-LN-A4MR-01;TCGA-LN-A5U5-01;TCGA-LN-A7HY-01;TCGA-LN-A8I0-01;TCGA-VR-A8ER-01;TCGA-VR-A8EW-01;TCGA-VR-A8EX-01;TCGA-VR-AA7B-01;TCGA-Z6-AAPN-01	no_validation_or_external_data_used
outer	13	2		METH_promoter_state	TCGA_Hallmark_METH_promoter_state_C01v1	z_score	outer_training_samples_only	outer_validation_samples	74	18	TCGA-IG-A3I8-01;TCGA-IG-A3QL-01;TCGA-IG-A3YB-01;TCGA-IG-A4P3-01;TCGA-IG-A4QT-01;TCGA-IG-A50L-01;TCGA-IG-A51D-01;TCGA-IG-A5B8-01;TCGA-IG-A5S3-01;TCGA-IG-A625-01;TCGA-IG-A6QS-01;TCGA-IG-A8O2-01;TCGA-IG-A97H-01;TCGA-IG-A97I-01;TCGA-JY-A6FA-01;TCGA-JY-A6FD-01;TCGA-JY-A6FG-01;TCGA-JY-A93F-01;TCGA-KH-A6WC-01;TCGA-L5-A43H-01;TCGA-L5-A4OM-01;TCGA-L5-A88W-01;TCGA-L5-A8NK-01;TCGA-L5-A8NQ-01;TCGA-L7-A56G-01…	TCGA-IG-A3Y9-01;TCGA-IG-A3YA-01;TCGA-JY-A6FE-01;TCGA-L5-A88S-01;TCGA-L5-A88Z-01;TCGA-LN-A49M-01;TCGA-LN-A49W-01;TCGA-LN-A49X-01;TCGA-LN-A4A2-01;TCGA-LN-A4MR-01;TCGA-LN-A5U5-01;TCGA-LN-A7HY-01;TCGA-LN-A8I0-01;TCGA-VR-A8ER-01;TCGA-VR-A8EW-01;TCGA-VR-A8EX-01;TCGA-VR-AA7B-01;TCGA-Z6-AAPN-01	no_validation_or_external_data_used
outer	13	3		RNA_rank_activity	TCGA_Hallmark_RNA_rank_activity_C01v1	z_score	outer_training_samples_only	outer_validation_samples	74	18	TCGA-IG-A3I8-01;TCGA-IG-A3Y9-01;TCGA-IG-A3YA-01;TCGA-IG-A4QT-01;TCGA-IG-A50L-01;TCGA-IG-A51D-01;TCGA-IG-A5B8-01;TCGA-IG-A5S3-01;TCGA-IG-A6QS-01;TCGA-IG-A97H-01;TCGA-IG-A97I-01;TCGA-JY-A6FA-01;TCGA-JY-A6FD-01;TCGA-JY-A6FE-01;TCGA-JY-A6FG-01;TCGA-JY-A93F-01;TCGA-L5-A43H-01;TCGA-L5-A4OM-01;TCGA-L5-A88S-01;TCGA-L5-A88Z-01;TCGA-L5-A8NK-01;TCGA-L5-A8NQ-01;TCGA-L7-A56G-01;TCGA-LN-A49M-01;TCGA-LN-A49N-01…	TCGA-IG-A3QL-01;TCGA-IG-A3YB-01;TCGA-IG-A4P3-01;TCGA-IG-A625-01;TCGA-IG-A8O2-01;TCGA-KH-A6WC-01;TCGA-L5-A88W-01;TCGA-LN-A49K-01;TCGA-LN-A49L-01;TCGA-LN-A49U-01;TCGA-LN-A4A1-01;TCGA-LN-A7HW-01;TCGA-LN-A7HZ-01;TCGA-LN-A9FO-01;TCGA-LN-A9FQ-01;TCGA-LN-A9FR-01;TCGA-V5-AASV-01;TCGA-Z6-A9VB-01	no_validation_or_external_data_used
outer	13	3		CNV_abs_burden	TCGA_Hallmark_CNV_abs_burden_C01v1	z_score	outer_training_samples_only	outer_validation_samples	74	18	TCGA-IG-A3I8-01;TCGA-IG-A3Y9-01;TCGA-IG-A3YA-01;TCGA-IG-A4QT-01;TCGA-IG-A50L-01;TCGA-IG-A51D-01;TCGA-IG-A5B8-01;TCGA-IG-A5S3-01;TCGA-IG-A6QS-01;TCGA-IG-A97H-01;TCGA-IG-A97I-01;TCGA-JY-A6FA-01;TCGA-JY-A6FD-01;TCGA-JY-A6FE-01;TCGA-JY-A6FG-01;TCGA-JY-A93F-01;TCGA-L5-A43H-01;TCGA-L5-A4OM-01;TCGA-L5-A88S-01;TCGA-L5-A88Z-01;TCGA-L5-A8NK-01;TCGA-L5-A8NQ-01;TCGA-L7-A56G-01;TCGA-LN-A49M-01;TCGA-LN-A49N-01…	TCGA-IG-A3QL-01;TCGA-IG-A3YB-01;TCGA-IG-A4P3-01;TCGA-IG-A625-01;TCGA-IG-A8O2-01;TCGA-KH-A6WC-01;TCGA-L5-A88W-01;TCGA-LN-A49K-01;TCGA-LN-A49L-01;TCGA-LN-A49U-01;TCGA-LN-A4A1-01;TCGA-LN-A7HW-01;TCGA-LN-A7HZ-01;TCGA-LN-A9FO-01;TCGA-LN-A9FQ-01;TCGA-LN-A9FR-01;TCGA-V5-AASV-01;TCGA-Z6-A9VB-01	no_validation_or_external_data_used
outer	13	3		METH_promoter_state	TCGA_Hallmark_METH_promoter_state_C01v1	z_score	outer_training_samples_only	outer_validation_samples	74	18	TCGA-IG-A3I8-01;TCGA-IG-A3Y9-01;TCGA-IG-A3YA-01;TCGA-IG-A4QT-01;TCGA-IG-A50L-01;TCGA-IG-A51D-01;TCGA-IG-A5B8-01;TCGA-IG-A5S3-01;TCGA-IG-A6QS-01;TCGA-IG-A97H-01;TCGA-IG-A97I-01;TCGA-JY-A6FA-01;TCGA-JY-A6FD-01;TCGA-JY-A6FE-01;TCGA-JY-A6FG-01;TCGA-JY-A93F-01;TCGA-L5-A43H-01;TCGA-L5-A4OM-01;TCGA-L5-A88S-01;TCGA-L5-A88Z-01;TCGA-L5-A8NK-01;TCGA-L5-A8NQ-01;TCGA-L7-A56G-01;TCGA-LN-A49M-01;TCGA-LN-A49N-01…	TCGA-IG-A3QL-01;TCGA-IG-A3YB-01;TCGA-IG-A4P3-01;TCGA-IG-A625-01;TCGA-IG-A8O2-01;TCGA-KH-A6WC-01;TCGA-L5-A88W-01;TCGA-LN-A49K-01;TCGA-LN-A49L-01;TCGA-LN-A49U-01;TCGA-LN-A4A1-01;TCGA-LN-A7HW-01;TCGA-LN-A7HZ-01;TCGA-LN-A9FO-01;TCGA-LN-A9FQ-01;TCGA-LN-A9FR-01;TCGA-V5-AASV-01;TCGA-Z6-A9VB-01	no_validation_or_external_data_used
outer	13	4		RNA_rank_activity	TCGA_Hallmark_RNA_rank_activity_C01v1	z_score	outer_training_samples_only	outer_validation_samples	74	18	TCGA-IG-A3QL-01;TCGA-IG-A3Y9-01;TCGA-IG-A3YA-01;TCGA-IG-A3YB-01;TCGA-IG-A4P3-01;TCGA-IG-A50L-01;TCGA-IG-A5B8-01;TCGA-IG-A5S3-01;TCGA-IG-A625-01;TCGA-IG-A8O2-01;TCGA-JY-A6FA-01;TCGA-JY-A6FD-01;TCGA-JY-A6FE-01;TCGA-JY-A6FG-01;TCGA-JY-A93F-01;TCGA-KH-A6WC-01;TCGA-L5-A43H-01;TCGA-L5-A88S-01;TCGA-L5-A88W-01;TCGA-L5-A88Z-01;TCGA-L5-A8NQ-01;TCGA-L7-A56G-01;TCGA-LN-A49K-01;TCGA-LN-A49L-01;TCGA-LN-A49M-01…	TCGA-IG-A3I8-01;TCGA-IG-A4QT-01;TCGA-IG-A51D-01;TCGA-IG-A6QS-01;TCGA-IG-A97H-01;TCGA-IG-A97I-01;TCGA-L5-A4OM-01;TCGA-L5-A8NK-01;TCGA-LN-A49Y-01;TCGA-LN-A4MQ-01;TCGA-LN-A8HZ-01;TCGA-LN-A9FP-01;TCGA-Q9-A6FU-01;TCGA-VR-A8EO-01;TCGA-VR-A8EY-01;TCGA-VR-A8Q7-01;TCGA-VR-AA7D-01;TCGA-VR-AA7I-01	no_validation_or_external_data_used
outer	13	4		CNV_abs_burden	TCGA_Hallmark_CNV_abs_burden_C01v1	z_score	outer_training_samples_only	outer_validation_samples	74	18	TCGA-IG-A3QL-01;TCGA-IG-A3Y9-01;TCGA-IG-A3YA-01;TCGA-IG-A3YB-01;TCGA-IG-A4P3-01;TCGA-IG-A50L-01;TCGA-IG-A5B8-01;TCGA-IG-A5S3-01;TCGA-IG-A625-01;TCGA-IG-A8O2-01;TCGA-JY-A6FA-01;TCGA-JY-A6FD-01;TCGA-JY-A6FE-01;TCGA-JY-A6FG-01;TCGA-JY-A93F-01;TCGA-KH-A6WC-01;TCGA-L5-A43H-01;TCGA-L5-A88S-01;TCGA-L5-A88W-01;TCGA-L5-A88Z-01;TCGA-L5-A8NQ-01;TCGA-L7-A56G-01;TCGA-LN-A49K-01;TCGA-LN-A49L-01;TCGA-LN-A49M-01…	TCGA-IG-A3I8-01;TCGA-IG-A4QT-01;TCGA-IG-A51D-01;TCGA-IG-A6QS-01;TCGA-IG-A97H-01;TCGA-IG-A97I-01;TCGA-L5-A4OM-01;TCGA-L5-A8NK-01;TCGA-LN-A49Y-01;TCGA-LN-A4MQ-01;TCGA-LN-A8HZ-01;TCGA-LN-A9FP-01;TCGA-Q9-A6FU-01;TCGA-VR-A8EO-01;TCGA-VR-A8EY-01;TCGA-VR-A8Q7-01;TCGA-VR-AA7D-01;TCGA-VR-AA7I-01	no_validation_or_external_data_used
outer	13	4		METH_promoter_state	TCGA_Hallmark_METH_promoter_state_C01v1	z_score	outer_training_samples_only	outer_validation_samples	74	18	TCGA-IG-A3QL-01;TCGA-IG-A3Y9-01;TCGA-IG-A3YA-01;TCGA-IG-A3YB-01;TCGA-IG-A4P3-01;TCGA-IG-A50L-01;TCGA-IG-A5B8-01;TCGA-IG-A5S3-01;TCGA-IG-A625-01;TCGA-IG-A8O2-01;TCGA-JY-A6FA-01;TCGA-JY-A6FD-01;TCGA-JY-A6FE-01;TCGA-JY-A6FG-01;TCGA-JY-A93F-01;TCGA-KH-A6WC-01;TCGA-L5-A43H-01;TCGA-L5-A88S-01;TCGA-L5-A88W-01;TCGA-L5-A88Z-01;TCGA-L5-A8NQ-01;TCGA-L7-A56G-01;TCGA-LN-A49K-01;TCGA-LN-A49L-01;TCGA-LN-A49M-01…	TCGA-IG-A3I8-01;TCGA-IG-A4QT-01;TCGA-IG-A51D-01;TCGA-IG-A6QS-01;TCGA-IG-A97H-01;TCGA-IG-A97I-01;TCGA-L5-A4OM-01;TCGA-L5-A8NK-01;TCGA-LN-A49Y-01;TCGA-LN-A4MQ-01;TCGA-LN-A8HZ-01;TCGA-LN-A9FP-01;TCGA-Q9-A6FU-01;TCGA-VR-A8EO-01;TCGA-VR-A8EY-01;TCGA-VR-A8Q7-01;TCGA-VR-AA7D-01;TCGA-VR-AA7I-01	no_validation_or_external_data_used
outer	13	5		RNA_rank_activity	TCGA_Hallmark_RNA_rank_activity_C01v1	z_score	outer_training_samples_only	outer_validation_samples	74	18	TCGA-IG-A3I8-01;TCGA-IG-A3QL-01;TCGA-IG-A3Y9-01;TCGA-IG-A3YA-01;TCGA-IG-A3YB-01;TCGA-IG-A4P3-01;TCGA-IG-A4QT-01;TCGA-IG-A51D-01;TCGA-IG-A5B8-01;TCGA-IG-A5S3-01;TCGA-IG-A625-01;TCGA-IG-A6QS-01;TCGA-IG-A8O2-01;TCGA-IG-A97H-01;TCGA-IG-A97I-01;TCGA-JY-A6FA-01;TCGA-JY-A6FE-01;TCGA-KH-A6WC-01;TCGA-L5-A4OM-01;TCGA-L5-A88S-01;TCGA-L5-A88W-01;TCGA-L5-A88Z-01;TCGA-L5-A8NK-01;TCGA-L5-A8NQ-01;TCGA-LN-A49K-01…	TCGA-IG-A50L-01;TCGA-JY-A6FD-01;TCGA-JY-A6FG-01;TCGA-JY-A93F-01;TCGA-L5-A43H-01;TCGA-L7-A56G-01;TCGA-LN-A49S-01;TCGA-LN-A4A5-01;TCGA-LN-A4A6-01;TCGA-LN-A4A8-01;TCGA-LN-A4A9-01;TCGA-LN-A5U6-01;TCGA-LN-A5U7-01;TCGA-LN-A8I1-01;TCGA-VR-A8EP-01;TCGA-VR-A8ET-01;TCGA-XP-A8T8-01;TCGA-Z6-A8JD-01	no_validation_or_external_data_used
outer	13	5		CNV_abs_burden	TCGA_Hallmark_CNV_abs_burden_C01v1	z_score	outer_training_samples_only	outer_validation_samples	74	18	TCGA-IG-A3I8-01;TCGA-IG-A3QL-01;TCGA-IG-A3Y9-01;TCGA-IG-A3YA-01;TCGA-IG-A3YB-01;TCGA-IG-A4P3-01;TCGA-IG-A4QT-01;TCGA-IG-A51D-01;TCGA-IG-A5B8-01;TCGA-IG-A5S3-01;TCGA-IG-A625-01;TCGA-IG-A6QS-01;TCGA-IG-A8O2-01;TCGA-IG-A97H-01;TCGA-IG-A97I-01;TCGA-JY-A6FA-01;TCGA-JY-A6FE-01;TCGA-KH-A6WC-01;TCGA-L5-A4OM-01;TCGA-L5-A88S-01;TCGA-L5-A88W-01;TCGA-L5-A88Z-01;TCGA-L5-A8NK-01;TCGA-L5-A8NQ-01;TCGA-LN-A49K-01…	TCGA-IG-A50L-01;TCGA-JY-A6FD-01;TCGA-JY-A6FG-01;TCGA-JY-A93F-01;TCGA-L5-A43H-01;TCGA-L7-A56G-01;TCGA-LN-A49S-01;TCGA-LN-A4A5-01;TCGA-LN-A4A6-01;TCGA-LN-A4A8-01;TCGA-LN-A4A9-01;TCGA-LN-A5U6-01;TCGA-LN-A5U7-01;TCGA-LN-A8I1-01;TCGA-VR-A8EP-01;TCGA-VR-A8ET-01;TCGA-XP-A8T8-01;TCGA-Z6-A8JD-01	no_validation_or_external_data_used
outer	13	5		METH_promoter_state	TCGA_Hallmark_METH_promoter_state_C01v1	z_score	outer_training_samples_only	outer_validation_samples	74	18	TCGA-IG-A3I8-01;TCGA-IG-A3QL-01;TCGA-IG-A3Y9-01;TCGA-IG-A3YA-01;TCGA-IG-A3YB-01;TCGA-IG-A4P3-01;TCGA-IG-A4QT-01;TCGA-IG-A51D-01;TCGA-IG-A5B8-01;TCGA-IG-A5S3-01;TCGA-IG-A625-01;TCGA-IG-A6QS-01;TCGA-IG-A8O2-01;TCGA-IG-A97H-01;TCGA-IG-A97I-01;TCGA-JY-A6FA-01;TCGA-JY-A6FE-01;TCGA-KH-A6WC-01;TCGA-L5-A4OM-01;TCGA-L5-A88S-01;TCGA-L5-A88W-01;TCGA-L5-A88Z-01;TCGA-L5-A8NK-01;TCGA-L5-A8NQ-01;TCGA-LN-A49K-01…	TCGA-IG-A50L-01;TCGA-JY-A6FD-01;TCGA-JY-A6FG-01;TCGA-JY-A93F-01;TCGA-L5-A43H-01;TCGA-L7-A56G-01;TCGA-LN-A49S-01;TCGA-LN-A4A5-01;TCGA-LN-A4A6-01;TCGA-LN-A4A8-01;TCGA-LN-A4A9-01;TCGA-LN-A5U6-01;TCGA-LN-A5U7-01;TCGA-LN-A8I1-01;TCGA-VR-A8EP-01;TCGA-VR-A8ET-01;TCGA-XP-A8T8-01;TCGA-Z6-A8JD-01	no_validation_or_external_data_used
outer	14	1		RNA_rank_activity	TCGA_Hallmark_RNA_rank_activity_C01v1	z_score	outer_training_samples_only	outer_validation_samples	72	20	TCGA-IG-A3I8-01;TCGA-IG-A3QL-01;TCGA-IG-A3Y9-01;TCGA-IG-A3YB-01;TCGA-IG-A4P3-01;TCGA-IG-A4QT-01;TCGA-IG-A50L-01;TCGA-IG-A51D-01;TCGA-IG-A5B8-01;TCGA-IG-A5S3-01;TCGA-IG-A6QS-01;TCGA-IG-A8O2-01;TCGA-IG-A97H-01;TCGA-IG-A97I-01;TCGA-JY-A6FD-01;TCGA-JY-A6FE-01;TCGA-JY-A6FG-01;TCGA-JY-A93F-01;TCGA-KH-A6WC-01;TCGA-L5-A4OM-01;TCGA-L5-A88S-01;TCGA-L5-A88Z-01;TCGA-L5-A8NK-01;TCGA-L5-A8NQ-01;TCGA-L7-A56G-01…	TCGA-IG-A3YA-01;TCGA-IG-A625-01;TCGA-JY-A6FA-01;TCGA-L5-A43H-01;TCGA-L5-A88W-01;TCGA-LN-A49S-01;TCGA-LN-A4A1-01;TCGA-LN-A4A8-01;TCGA-LN-A4MR-01;TCGA-LN-A8HZ-01;TCGA-LN-A9FR-01;TCGA-Q9-A6FU-01;TCGA-V5-AASV-01;TCGA-VR-A8EO-01;TCGA-VR-A8EP-01;TCGA-VR-A8ER-01;TCGA-VR-A8EY-01;TCGA-VR-AA7I-01;TCGA-Z6-A9VB-01;TCGA-Z6-AAPN-01	no_validation_or_external_data_used
outer	14	1		CNV_abs_burden	TCGA_Hallmark_CNV_abs_burden_C01v1	z_score	outer_training_samples_only	outer_validation_samples	72	20	TCGA-IG-A3I8-01;TCGA-IG-A3QL-01;TCGA-IG-A3Y9-01;TCGA-IG-A3YB-01;TCGA-IG-A4P3-01;TCGA-IG-A4QT-01;TCGA-IG-A50L-01;TCGA-IG-A51D-01;TCGA-IG-A5B8-01;TCGA-IG-A5S3-01;TCGA-IG-A6QS-01;TCGA-IG-A8O2-01;TCGA-IG-A97H-01;TCGA-IG-A97I-01;TCGA-JY-A6FD-01;TCGA-JY-A6FE-01;TCGA-JY-A6FG-01;TCGA-JY-A93F-01;TCGA-KH-A6WC-01;TCGA-L5-A4OM-01;TCGA-L5-A88S-01;TCGA-L5-A88Z-01;TCGA-L5-A8NK-01;TCGA-L5-A8NQ-01;TCGA-L7-A56G-01…	TCGA-IG-A3YA-01;TCGA-IG-A625-01;TCGA-JY-A6FA-01;TCGA-L5-A43H-01;TCGA-L5-A88W-01;TCGA-LN-A49S-01;TCGA-LN-A4A1-01;TCGA-LN-A4A8-01;TCGA-LN-A4MR-01;TCGA-LN-A8HZ-01;TCGA-LN-A9FR-01;TCGA-Q9-A6FU-01;TCGA-V5-AASV-01;TCGA-VR-A8EO-01;TCGA-VR-A8EP-01;TCGA-VR-A8ER-01;TCGA-VR-A8EY-01;TCGA-VR-AA7I-01;TCGA-Z6-A9VB-01;TCGA-Z6-AAPN-01	no_validation_or_external_data_used
outer	14	1		METH_promoter_state	TCGA_Hallmark_METH_promoter_state_C01v1	z_score	outer_training_samples_only	outer_validation_samples	72	20	TCGA-IG-A3I8-01;TCGA-IG-A3QL-01;TCGA-IG-A3Y9-01;TCGA-IG-A3YB-01;TCGA-IG-A4P3-01;TCGA-IG-A4QT-01;TCGA-IG-A50L-01;TCGA-IG-A51D-01;TCGA-IG-A5B8-01;TCGA-IG-A5S3-01;TCGA-IG-A6QS-01;TCGA-IG-A8O2-01;TCGA-IG-A97H-01;TCGA-IG-A97I-01;TCGA-JY-A6FD-01;TCGA-JY-A6FE-01;TCGA-JY-A6FG-01;TCGA-JY-A93F-01;TCGA-KH-A6WC-01;TCGA-L5-A4OM-01;TCGA-L5-A88S-01;TCGA-L5-A88Z-01;TCGA-L5-A8NK-01;TCGA-L5-A8NQ-01;TCGA-L7-A56G-01…	TCGA-IG-A3YA-01;TCGA-IG-A625-01;TCGA-JY-A6FA-01;TCGA-L5-A43H-01;TCGA-L5-A88W-01;TCGA-LN-A49S-01;TCGA-LN-A4A1-01;TCGA-LN-A4A8-01;TCGA-LN-A4MR-01;TCGA-LN-A8HZ-01;TCGA-LN-A9FR-01;TCGA-Q9-A6FU-01;TCGA-V5-AASV-01;TCGA-VR-A8EO-01;TCGA-VR-A8EP-01;TCGA-VR-A8ER-01;TCGA-VR-A8EY-01;TCGA-VR-AA7I-01;TCGA-Z6-A9VB-01;TCGA-Z6-AAPN-01	no_validation_or_external_data_used
outer	14	2		RNA_rank_activity	TCGA_Hallmark_RNA_rank_activity_C01v1	z_score	outer_training_samples_only	outer_validation_samples	74	18	TCGA-IG-A3I8-01;TCGA-IG-A3QL-01;TCGA-IG-A3Y9-01;TCGA-IG-A3YA-01;TCGA-IG-A3YB-01;TCGA-IG-A4P3-01;TCGA-IG-A4QT-01;TCGA-IG-A50L-01;TCGA-IG-A51D-01;TCGA-IG-A5B8-01;TCGA-IG-A5S3-01;TCGA-IG-A625-01;TCGA-IG-A6QS-01;TCGA-IG-A8O2-01;TCGA-IG-A97H-01;TCGA-IG-A97I-01;TCGA-JY-A6FA-01;TCGA-JY-A6FD-01;TCGA-JY-A93F-01;TCGA-KH-A6WC-01;TCGA-L5-A43H-01;TCGA-L5-A88S-01;TCGA-L5-A88W-01;TCGA-L5-A88Z-01;TCGA-L5-A8NK-01…	TCGA-JY-A6FE-01;TCGA-JY-A6FG-01;TCGA-L5-A4OM-01;TCGA-L5-A8NQ-01;TCGA-L7-A56G-01;TCGA-LN-A49M-01;TCGA-LN-A49N-01;TCGA-LN-A49O-01;TCGA-LN-A49V-01;TCGA-LN-A4A4-01;TCGA-LN-A4A9-01;TCGA-LN-A7HY-01;TCGA-LN-A8I1-01;TCGA-LN-A9FP-01;TCGA-LN-A9FQ-01;TCGA-S8-A6BW-01;TCGA-VR-A8Q7-01;TCGA-XP-A8T8-01	no_validation_or_external_data_used
outer	14	2		CNV_abs_burden	TCGA_Hallmark_CNV_abs_burden_C01v1	z_score	outer_training_samples_only	outer_validation_samples	74	18	TCGA-IG-A3I8-01;TCGA-IG-A3QL-01;TCGA-IG-A3Y9-01;TCGA-IG-A3YA-01;TCGA-IG-A3YB-01;TCGA-IG-A4P3-01;TCGA-IG-A4QT-01;TCGA-IG-A50L-01;TCGA-IG-A51D-01;TCGA-IG-A5B8-01;TCGA-IG-A5S3-01;TCGA-IG-A625-01;TCGA-IG-A6QS-01;TCGA-IG-A8O2-01;TCGA-IG-A97H-01;TCGA-IG-A97I-01;TCGA-JY-A6FA-01;TCGA-JY-A6FD-01;TCGA-JY-A93F-01;TCGA-KH-A6WC-01;TCGA-L5-A43H-01;TCGA-L5-A88S-01;TCGA-L5-A88W-01;TCGA-L5-A88Z-01;TCGA-L5-A8NK-01…	TCGA-JY-A6FE-01;TCGA-JY-A6FG-01;TCGA-L5-A4OM-01;TCGA-L5-A8NQ-01;TCGA-L7-A56G-01;TCGA-LN-A49M-01;TCGA-LN-A49N-01;TCGA-LN-A49O-01;TCGA-LN-A49V-01;TCGA-LN-A4A4-01;TCGA-LN-A4A9-01;TCGA-LN-A7HY-01;TCGA-LN-A8I1-01;TCGA-LN-A9FP-01;TCGA-LN-A9FQ-01;TCGA-S8-A6BW-01;TCGA-VR-A8Q7-01;TCGA-XP-A8T8-01	no_validation_or_external_data_used
outer	14	2		METH_promoter_state	TCGA_Hallmark_METH_promoter_state_C01v1	z_score	outer_training_samples_only	outer_validation_samples	74	18	TCGA-IG-A3I8-01;TCGA-IG-A3QL-01;TCGA-IG-A3Y9-01;TCGA-IG-A3YA-01;TCGA-IG-A3YB-01;TCGA-IG-A4P3-01;TCGA-IG-A4QT-01;TCGA-IG-A50L-01;TCGA-IG-A51D-01;TCGA-IG-A5B8-01;TCGA-IG-A5S3-01;TCGA-IG-A625-01;TCGA-IG-A6QS-01;TCGA-IG-A8O2-01;TCGA-IG-A97H-01;TCGA-IG-A97I-01;TCGA-JY-A6FA-01;TCGA-JY-A6FD-01;TCGA-JY-A93F-01;TCGA-KH-A6WC-01;TCGA-L5-A43H-01;TCGA-L5-A88S-01;TCGA-L5-A88W-01;TCGA-L5-A88Z-01;TCGA-L5-A8NK-01…	TCGA-JY-A6FE-01;TCGA-JY-A6FG-01;TCGA-L5-A4OM-01;TCGA-L5-A8NQ-01;TCGA-L7-A56G-01;TCGA-LN-A49M-01;TCGA-LN-A49N-01;TCGA-LN-A49O-01;TCGA-LN-A49V-01;TCGA-LN-A4A4-01;TCGA-LN-A4A9-01;TCGA-LN-A7HY-01;TCGA-LN-A8I1-01;TCGA-LN-A9FP-01;TCGA-LN-A9FQ-01;TCGA-S8-A6BW-01;TCGA-VR-A8Q7-01;TCGA-XP-A8T8-01	no_validation_or_external_data_used
outer	14	3		RNA_rank_activity	TCGA_Hallmark_RNA_rank_activity_C01v1	z_score	outer_training_samples_only	outer_validation_samples	74	18	TCGA-IG-A3I8-01;TCGA-IG-A3YA-01;TCGA-IG-A3YB-01;TCGA-IG-A4QT-01;TCGA-IG-A50L-01;TCGA-IG-A51D-01;TCGA-IG-A5B8-01;TCGA-IG-A625-01;TCGA-IG-A6QS-01;TCGA-IG-A8O2-01;TCGA-IG-A97H-01;TCGA-IG-A97I-01;TCGA-JY-A6FA-01;TCGA-JY-A6FD-01;TCGA-JY-A6FE-01;TCGA-JY-A6FG-01;TCGA-JY-A93F-01;TCGA-KH-A6WC-01;TCGA-L5-A43H-01;TCGA-L5-A4OM-01;TCGA-L5-A88S-01;TCGA-L5-A88W-01;TCGA-L5-A88Z-01;TCGA-L5-A8NK-01;TCGA-L5-A8NQ-01…	TCGA-IG-A3QL-01;TCGA-IG-A3Y9-01;TCGA-IG-A4P3-01;TCGA-IG-A5S3-01;TCGA-LN-A49U-01;TCGA-LN-A49W-01;TCGA-LN-A4A5-01;TCGA-LN-A5U6-01;TCGA-LN-A7HZ-01;TCGA-LN-A8I0-01;TCGA-LN-A9FO-01;TCGA-V5-A7RC-01;TCGA-VR-A8EX-01;TCGA-VR-AA4G-01;TCGA-VR-AA7B-01;TCGA-VR-AA7D-01;TCGA-Z6-A8JD-01;TCGA-Z6-A8JE-01	no_validation_or_external_data_used
outer	14	3		CNV_abs_burden	TCGA_Hallmark_CNV_abs_burden_C01v1	z_score	outer_training_samples_only	outer_validation_samples	74	18	TCGA-IG-A3I8-01;TCGA-IG-A3YA-01;TCGA-IG-A3YB-01;TCGA-IG-A4QT-01;TCGA-IG-A50L-01;TCGA-IG-A51D-01;TCGA-IG-A5B8-01;TCGA-IG-A625-01;TCGA-IG-A6QS-01;TCGA-IG-A8O2-01;TCGA-IG-A97H-01;TCGA-IG-A97I-01;TCGA-JY-A6FA-01;TCGA-JY-A6FD-01;TCGA-JY-A6FE-01;TCGA-JY-A6FG-01;TCGA-JY-A93F-01;TCGA-KH-A6WC-01;TCGA-L5-A43H-01;TCGA-L5-A4OM-01;TCGA-L5-A88S-01;TCGA-L5-A88W-01;TCGA-L5-A88Z-01;TCGA-L5-A8NK-01;TCGA-L5-A8NQ-01…	TCGA-IG-A3QL-01;TCGA-IG-A3Y9-01;TCGA-IG-A4P3-01;TCGA-IG-A5S3-01;TCGA-LN-A49U-01;TCGA-LN-A49W-01;TCGA-LN-A4A5-01;TCGA-LN-A5U6-01;TCGA-LN-A7HZ-01;TCGA-LN-A8I0-01;TCGA-LN-A9FO-01;TCGA-V5-A7RC-01;TCGA-VR-A8EX-01;TCGA-VR-AA4G-01;TCGA-VR-AA7B-01;TCGA-VR-AA7D-01;TCGA-Z6-A8JD-01;TCGA-Z6-A8JE-01	no_validation_or_external_data_used
outer	14	3		METH_promoter_state	TCGA_Hallmark_METH_promoter_state_C01v1	z_score	outer_training_samples_only	outer_validation_samples	74	18	TCGA-IG-A3I8-01;TCGA-IG-A3YA-01;TCGA-IG-A3YB-01;TCGA-IG-A4QT-01;TCGA-IG-A50L-01;TCGA-IG-A51D-01;TCGA-IG-A5B8-01;TCGA-IG-A625-01;TCGA-IG-A6QS-01;TCGA-IG-A8O2-01;TCGA-IG-A97H-01;TCGA-IG-A97I-01;TCGA-JY-A6FA-01;TCGA-JY-A6FD-01;TCGA-JY-A6FE-01;TCGA-JY-A6FG-01;TCGA-JY-A93F-01;TCGA-KH-A6WC-01;TCGA-L5-A43H-01;TCGA-L5-A4OM-01;TCGA-L5-A88S-01;TCGA-L5-A88W-01;TCGA-L5-A88Z-01;TCGA-L5-A8NK-01;TCGA-L5-A8NQ-01…	TCGA-IG-A3QL-01;TCGA-IG-A3Y9-01;TCGA-IG-A4P3-01;TCGA-IG-A5S3-01;TCGA-LN-A49U-01;TCGA-LN-A49W-01;TCGA-LN-A4A5-01;TCGA-LN-A5U6-01;TCGA-LN-A7HZ-01;TCGA-LN-A8I0-01;TCGA-LN-A9FO-01;TCGA-V5-A7RC-01;TCGA-VR-A8EX-01;TCGA-VR-AA4G-01;TCGA-VR-AA7B-01;TCGA-VR-AA7D-01;TCGA-Z6-A8JD-01;TCGA-Z6-A8JE-01	no_validation_or_external_data_used
outer	14	4		RNA_rank_activity	TCGA_Hallmark_RNA_rank_activity_C01v1	z_score	outer_training_samples_only	outer_validation_samples	74	18	TCGA-IG-A3I8-01;TCGA-IG-A3QL-01;TCGA-IG-A3Y9-01;TCGA-IG-A3YA-01;TCGA-IG-A3YB-01;TCGA-IG-A4P3-01;TCGA-IG-A50L-01;TCGA-IG-A51D-01;TCGA-IG-A5S3-01;TCGA-IG-A625-01;TCGA-IG-A6QS-01;TCGA-IG-A8O2-01;TCGA-IG-A97I-01;TCGA-JY-A6FA-01;TCGA-JY-A6FE-01;TCGA-JY-A6FG-01;TCGA-L5-A43H-01;TCGA-L5-A4OM-01;TCGA-L5-A88W-01;TCGA-L5-A8NK-01;TCGA-L5-A8NQ-01;TCGA-L7-A56G-01;TCGA-LN-A49K-01;TCGA-LN-A49L-01;TCGA-LN-A49M-01…	TCGA-IG-A4QT-01;TCGA-IG-A5B8-01;TCGA-IG-A97H-01;TCGA-JY-A6FD-01;TCGA-JY-A93F-01;TCGA-KH-A6WC-01;TCGA-L5-A88S-01;TCGA-L5-A88Z-01;TCGA-LN-A49Y-01;TCGA-LN-A4A2-01;TCGA-LN-A4A6-01;TCGA-LN-A7HV-01;TCGA-LN-A7HW-01;TCGA-LN-A7HX-01;TCGA-VR-A8ET-01;TCGA-VR-A8EU-01;TCGA-VR-A8EW-01;TCGA-XP-A8T6-01	no_validation_or_external_data_used
outer	14	4		CNV_abs_burden	TCGA_Hallmark_CNV_abs_burden_C01v1	z_score	outer_training_samples_only	outer_validation_samples	74	18	TCGA-IG-A3I8-01;TCGA-IG-A3QL-01;TCGA-IG-A3Y9-01;TCGA-IG-A3YA-01;TCGA-IG-A3YB-01;TCGA-IG-A4P3-01;TCGA-IG-A50L-01;TCGA-IG-A51D-01;TCGA-IG-A5S3-01;TCGA-IG-A625-01;TCGA-IG-A6QS-01;TCGA-IG-A8O2-01;TCGA-IG-A97I-01;TCGA-JY-A6FA-01;TCGA-JY-A6FE-01;TCGA-JY-A6FG-01;TCGA-L5-A43H-01;TCGA-L5-A4OM-01;TCGA-L5-A88W-01;TCGA-L5-A8NK-01;TCGA-L5-A8NQ-01;TCGA-L7-A56G-01;TCGA-LN-A49K-01;TCGA-LN-A49L-01;TCGA-LN-A49M-01…	TCGA-IG-A4QT-01;TCGA-IG-A5B8-01;TCGA-IG-A97H-01;TCGA-JY-A6FD-01;TCGA-JY-A93F-01;TCGA-KH-A6WC-01;TCGA-L5-A88S-01;TCGA-L5-A88Z-01;TCGA-LN-A49Y-01;TCGA-LN-A4A2-01;TCGA-LN-A4A6-01;TCGA-LN-A7HV-01;TCGA-LN-A7HW-01;TCGA-LN-A7HX-01;TCGA-VR-A8ET-01;TCGA-VR-A8EU-01;TCGA-VR-A8EW-01;TCGA-XP-A8T6-01	no_validation_or_external_data_used
outer	14	4		METH_promoter_state	TCGA_Hallmark_METH_promoter_state_C01v1	z_score	outer_training_samples_only	outer_validation_samples	74	18	TCGA-IG-A3I8-01;TCGA-IG-A3QL-01;TCGA-IG-A3Y9-01;TCGA-IG-A3YA-01;TCGA-IG-A3YB-01;TCGA-IG-A4P3-01;TCGA-IG-A50L-01;TCGA-IG-A51D-01;TCGA-IG-A5S3-01;TCGA-IG-A625-01;TCGA-IG-A6QS-01;TCGA-IG-A8O2-01;TCGA-IG-A97I-01;TCGA-JY-A6FA-01;TCGA-JY-A6FE-01;TCGA-JY-A6FG-01;TCGA-L5-A43H-01;TCGA-L5-A4OM-01;TCGA-L5-A88W-01;TCGA-L5-A8NK-01;TCGA-L5-A8NQ-01;TCGA-L7-A56G-01;TCGA-LN-A49K-01;TCGA-LN-A49L-01;TCGA-LN-A49M-01…	TCGA-IG-A4QT-01;TCGA-IG-A5B8-01;TCGA-IG-A97H-01;TCGA-JY-A6FD-01;TCGA-JY-A93F-01;TCGA-KH-A6WC-01;TCGA-L5-A88S-01;TCGA-L5-A88Z-01;TCGA-LN-A49Y-01;TCGA-LN-A4A2-01;TCGA-LN-A4A6-01;TCGA-LN-A7HV-01;TCGA-LN-A7HW-01;TCGA-LN-A7HX-01;TCGA-VR-A8ET-01;TCGA-VR-A8EU-01;TCGA-VR-A8EW-01;TCGA-XP-A8T6-01	no_validation_or_external_data_used
outer	14	5		RNA_rank_activity	TCGA_Hallmark_RNA_rank_activity_C01v1	z_score	outer_training_samples_only	outer_validation_samples	74	18	TCGA-IG-A3QL-01;TCGA-IG-A3Y9-01;TCGA-IG-A3YA-01;TCGA-IG-A4P3-01;TCGA-IG-A4QT-01;TCGA-IG-A5B8-01;TCGA-IG-A5S3-01;TCGA-IG-A625-01;TCGA-IG-A97H-01;TCGA-JY-A6FA-01;TCGA-JY-A6FD-01;TCGA-JY-A6FE-01;TCGA-JY-A6FG-01;TCGA-JY-A93F-01;TCGA-KH-A6WC-01;TCGA-L5-A43H-01;TCGA-L5-A4OM-01;TCGA-L5-A88S-01;TCGA-L5-A88W-01;TCGA-L5-A88Z-01;TCGA-L5-A8NQ-01;TCGA-L7-A56G-01;TCGA-LN-A49M-01;TCGA-LN-A49N-01;TCGA-LN-A49O-01…	TCGA-IG-A3I8-01;TCGA-IG-A3YB-01;TCGA-IG-A50L-01;TCGA-IG-A51D-01;TCGA-IG-A6QS-01;TCGA-IG-A8O2-01;TCGA-IG-A97I-01;TCGA-L5-A8NK-01;TCGA-LN-A49K-01;TCGA-LN-A49L-01;TCGA-LN-A49P-01;TCGA-LN-A49R-01;TCGA-LN-A49X-01;TCGA-LN-A4A3-01;TCGA-LN-A4MQ-01;TCGA-LN-A5U5-01;TCGA-LN-A5U7-01;TCGA-VR-A8EZ-01	no_validation_or_external_data_used
outer	14	5		CNV_abs_burden	TCGA_Hallmark_CNV_abs_burden_C01v1	z_score	outer_training_samples_only	outer_validation_samples	74	18	TCGA-IG-A3QL-01;TCGA-IG-A3Y9-01;TCGA-IG-A3YA-01;TCGA-IG-A4P3-01;TCGA-IG-A4QT-01;TCGA-IG-A5B8-01;TCGA-IG-A5S3-01;TCGA-IG-A625-01;TCGA-IG-A97H-01;TCGA-JY-A6FA-01;TCGA-JY-A6FD-01;TCGA-JY-A6FE-01;TCGA-JY-A6FG-01;TCGA-JY-A93F-01;TCGA-KH-A6WC-01;TCGA-L5-A43H-01;TCGA-L5-A4OM-01;TCGA-L5-A88S-01;TCGA-L5-A88W-01;TCGA-L5-A88Z-01;TCGA-L5-A8NQ-01;TCGA-L7-A56G-01;TCGA-LN-A49M-01;TCGA-LN-A49N-01;TCGA-LN-A49O-01…	TCGA-IG-A3I8-01;TCGA-IG-A3YB-01;TCGA-IG-A50L-01;TCGA-IG-A51D-01;TCGA-IG-A6QS-01;TCGA-IG-A8O2-01;TCGA-IG-A97I-01;TCGA-L5-A8NK-01;TCGA-LN-A49K-01;TCGA-LN-A49L-01;TCGA-LN-A49P-01;TCGA-LN-A49R-01;TCGA-LN-A49X-01;TCGA-LN-A4A3-01;TCGA-LN-A4MQ-01;TCGA-LN-A5U5-01;TCGA-LN-A5U7-01;TCGA-VR-A8EZ-01	no_validation_or_external_data_used
outer	14	5		METH_promoter_state	TCGA_Hallmark_METH_promoter_state_C01v1	z_score	outer_training_samples_only	outer_validation_samples	74	18	TCGA-IG-A3QL-01;TCGA-IG-A3Y9-01;TCGA-IG-A3YA-01;TCGA-IG-A4P3-01;TCGA-IG-A4QT-01;TCGA-IG-A5B8-01;TCGA-IG-A5S3-01;TCGA-IG-A625-01;TCGA-IG-A97H-01;TCGA-JY-A6FA-01;TCGA-JY-A6FD-01;TCGA-JY-A6FE-01;TCGA-JY-A6FG-01;TCGA-JY-A93F-01;TCGA-KH-A6WC-01;TCGA-L5-A43H-01;TCGA-L5-A4OM-01;TCGA-L5-A88S-01;TCGA-L5-A88W-01;TCGA-L5-A88Z-01;TCGA-L5-A8NQ-01;TCGA-L7-A56G-01;TCGA-LN-A49M-01;TCGA-LN-A49N-01;TCGA-LN-A49O-01…	TCGA-IG-A3I8-01;TCGA-IG-A3YB-01;TCGA-IG-A50L-01;TCGA-IG-A51D-01;TCGA-IG-A6QS-01;TCGA-IG-A8O2-01;TCGA-IG-A97I-01;TCGA-L5-A8NK-01;TCGA-LN-A49K-01;TCGA-LN-A49L-01;TCGA-LN-A49P-01;TCGA-LN-A49R-01;TCGA-LN-A49X-01;TCGA-LN-A4A3-01;TCGA-LN-A4MQ-01;TCGA-LN-A5U5-01;TCGA-LN-A5U7-01;TCGA-VR-A8EZ-01	no_validation_or_external_data_used
outer	15	1		RNA_rank_activity	TCGA_Hallmark_RNA_rank_activity_C01v1	z_score	outer_training_samples_only	outer_validation_samples	72	20	TCGA-IG-A3I8-01;TCGA-IG-A3QL-01;TCGA-IG-A3Y9-01;TCGA-IG-A3YB-01;TCGA-IG-A4P3-01;TCGA-IG-A4QT-01;TCGA-IG-A51D-01;TCGA-IG-A5S3-01;TCGA-IG-A625-01;TCGA-IG-A6QS-01;TCGA-IG-A8O2-01;TCGA-IG-A97H-01;TCGA-IG-A97I-01;TCGA-JY-A6FD-01;TCGA-JY-A6FE-01;TCGA-JY-A6FG-01;TCGA-JY-A93F-01;TCGA-KH-A6WC-01;TCGA-L5-A43H-01;TCGA-L5-A4OM-01;TCGA-L5-A88S-01;TCGA-L5-A88W-01;TCGA-L7-A56G-01;TCGA-LN-A49L-01;TCGA-LN-A49M-01…	TCGA-IG-A3YA-01;TCGA-IG-A50L-01;TCGA-IG-A5B8-01;TCGA-JY-A6FA-01;TCGA-L5-A88Z-01;TCGA-L5-A8NK-01;TCGA-L5-A8NQ-01;TCGA-LN-A49K-01;TCGA-LN-A49S-01;TCGA-LN-A49X-01;TCGA-LN-A4A5-01;TCGA-LN-A4A6-01;TCGA-LN-A4A8-01;TCGA-LN-A5U7-01;TCGA-LN-A7HX-01;TCGA-LN-A8I1-01;TCGA-VR-A8ET-01;TCGA-VR-A8EY-01;TCGA-VR-AA7B-01;TCGA-VR-AA7I-01	no_validation_or_external_data_used
outer	15	1		CNV_abs_burden	TCGA_Hallmark_CNV_abs_burden_C01v1	z_score	outer_training_samples_only	outer_validation_samples	72	20	TCGA-IG-A3I8-01;TCGA-IG-A3QL-01;TCGA-IG-A3Y9-01;TCGA-IG-A3YB-01;TCGA-IG-A4P3-01;TCGA-IG-A4QT-01;TCGA-IG-A51D-01;TCGA-IG-A5S3-01;TCGA-IG-A625-01;TCGA-IG-A6QS-01;TCGA-IG-A8O2-01;TCGA-IG-A97H-01;TCGA-IG-A97I-01;TCGA-JY-A6FD-01;TCGA-JY-A6FE-01;TCGA-JY-A6FG-01;TCGA-JY-A93F-01;TCGA-KH-A6WC-01;TCGA-L5-A43H-01;TCGA-L5-A4OM-01;TCGA-L5-A88S-01;TCGA-L5-A88W-01;TCGA-L7-A56G-01;TCGA-LN-A49L-01;TCGA-LN-A49M-01…	TCGA-IG-A3YA-01;TCGA-IG-A50L-01;TCGA-IG-A5B8-01;TCGA-JY-A6FA-01;TCGA-L5-A88Z-01;TCGA-L5-A8NK-01;TCGA-L5-A8NQ-01;TCGA-LN-A49K-01;TCGA-LN-A49S-01;TCGA-LN-A49X-01;TCGA-LN-A4A5-01;TCGA-LN-A4A6-01;TCGA-LN-A4A8-01;TCGA-LN-A5U7-01;TCGA-LN-A7HX-01;TCGA-LN-A8I1-01;TCGA-VR-A8ET-01;TCGA-VR-A8EY-01;TCGA-VR-AA7B-01;TCGA-VR-AA7I-01	no_validation_or_external_data_used
outer	15	1		METH_promoter_state	TCGA_Hallmark_METH_promoter_state_C01v1	z_score	outer_training_samples_only	outer_validation_samples	72	20	TCGA-IG-A3I8-01;TCGA-IG-A3QL-01;TCGA-IG-A3Y9-01;TCGA-IG-A3YB-01;TCGA-IG-A4P3-01;TCGA-IG-A4QT-01;TCGA-IG-A51D-01;TCGA-IG-A5S3-01;TCGA-IG-A625-01;TCGA-IG-A6QS-01;TCGA-IG-A8O2-01;TCGA-IG-A97H-01;TCGA-IG-A97I-01;TCGA-JY-A6FD-01;TCGA-JY-A6FE-01;TCGA-JY-A6FG-01;TCGA-JY-A93F-01;TCGA-KH-A6WC-01;TCGA-L5-A43H-01;TCGA-L5-A4OM-01;TCGA-L5-A88S-01;TCGA-L5-A88W-01;TCGA-L7-A56G-01;TCGA-LN-A49L-01;TCGA-LN-A49M-01…	TCGA-IG-A3YA-01;TCGA-IG-A50L-01;TCGA-IG-A5B8-01;TCGA-JY-A6FA-01;TCGA-L5-A88Z-01;TCGA-L5-A8NK-01;TCGA-L5-A8NQ-01;TCGA-LN-A49K-01;TCGA-LN-A49S-01;TCGA-LN-A49X-01;TCGA-LN-A4A5-01;TCGA-LN-A4A6-01;TCGA-LN-A4A8-01;TCGA-LN-A5U7-01;TCGA-LN-A7HX-01;TCGA-LN-A8I1-01;TCGA-VR-A8ET-01;TCGA-VR-A8EY-01;TCGA-VR-AA7B-01;TCGA-VR-AA7I-01	no_validation_or_external_data_used
outer	15	2		RNA_rank_activity	TCGA_Hallmark_RNA_rank_activity_C01v1	z_score	outer_training_samples_only	outer_validation_samples	74	18	TCGA-IG-A3I8-01;TCGA-IG-A3QL-01;TCGA-IG-A3Y9-01;TCGA-IG-A3YA-01;TCGA-IG-A3YB-01;TCGA-IG-A4QT-01;TCGA-IG-A50L-01;TCGA-IG-A51D-01;TCGA-IG-A5B8-01;TCGA-IG-A5S3-01;TCGA-IG-A625-01;TCGA-IG-A8O2-01;TCGA-IG-A97H-01;TCGA-IG-A97I-01;TCGA-JY-A6FA-01;TCGA-JY-A6FD-01;TCGA-JY-A6FE-01;TCGA-JY-A6FG-01;TCGA-KH-A6WC-01;TCGA-L5-A43H-01;TCGA-L5-A88S-01;TCGA-L5-A88W-01;TCGA-L5-A88Z-01;TCGA-L5-A8NK-01;TCGA-L5-A8NQ-01…	TCGA-IG-A4P3-01;TCGA-IG-A6QS-01;TCGA-JY-A93F-01;TCGA-L5-A4OM-01;TCGA-LN-A49P-01;TCGA-LN-A49R-01;TCGA-LN-A49W-01;TCGA-LN-A4A1-01;TCGA-LN-A4A2-01;TCGA-LN-A4A4-01;TCGA-LN-A7HW-01;TCGA-LN-A9FR-01;TCGA-S8-A6BW-01;TCGA-V5-A7RC-01;TCGA-VR-A8EW-01;TCGA-XP-A8T6-01;TCGA-XP-A8T8-01;TCGA-Z6-A9VB-01	no_validation_or_external_data_used
outer	15	2		CNV_abs_burden	TCGA_Hallmark_CNV_abs_burden_C01v1	z_score	outer_training_samples_only	outer_validation_samples	74	18	TCGA-IG-A3I8-01;TCGA-IG-A3QL-01;TCGA-IG-A3Y9-01;TCGA-IG-A3YA-01;TCGA-IG-A3YB-01;TCGA-IG-A4QT-01;TCGA-IG-A50L-01;TCGA-IG-A51D-01;TCGA-IG-A5B8-01;TCGA-IG-A5S3-01;TCGA-IG-A625-01;TCGA-IG-A8O2-01;TCGA-IG-A97H-01;TCGA-IG-A97I-01;TCGA-JY-A6FA-01;TCGA-JY-A6FD-01;TCGA-JY-A6FE-01;TCGA-JY-A6FG-01;TCGA-KH-A6WC-01;TCGA-L5-A43H-01;TCGA-L5-A88S-01;TCGA-L5-A88W-01;TCGA-L5-A88Z-01;TCGA-L5-A8NK-01;TCGA-L5-A8NQ-01…	TCGA-IG-A4P3-01;TCGA-IG-A6QS-01;TCGA-JY-A93F-01;TCGA-L5-A4OM-01;TCGA-LN-A49P-01;TCGA-LN-A49R-01;TCGA-LN-A49W-01;TCGA-LN-A4A1-01;TCGA-LN-A4A2-01;TCGA-LN-A4A4-01;TCGA-LN-A7HW-01;TCGA-LN-A9FR-01;TCGA-S8-A6BW-01;TCGA-V5-A7RC-01;TCGA-VR-A8EW-01;TCGA-XP-A8T6-01;TCGA-XP-A8T8-01;TCGA-Z6-A9VB-01	no_validation_or_external_data_used
outer	15	2		METH_promoter_state	TCGA_Hallmark_METH_promoter_state_C01v1	z_score	outer_training_samples_only	outer_validation_samples	74	18	TCGA-IG-A3I8-01;TCGA-IG-A3QL-01;TCGA-IG-A3Y9-01;TCGA-IG-A3YA-01;TCGA-IG-A3YB-01;TCGA-IG-A4QT-01;TCGA-IG-A50L-01;TCGA-IG-A51D-01;TCGA-IG-A5B8-01;TCGA-IG-A5S3-01;TCGA-IG-A625-01;TCGA-IG-A8O2-01;TCGA-IG-A97H-01;TCGA-IG-A97I-01;TCGA-JY-A6FA-01;TCGA-JY-A6FD-01;TCGA-JY-A6FE-01;TCGA-JY-A6FG-01;TCGA-KH-A6WC-01;TCGA-L5-A43H-01;TCGA-L5-A88S-01;TCGA-L5-A88W-01;TCGA-L5-A88Z-01;TCGA-L5-A8NK-01;TCGA-L5-A8NQ-01…	TCGA-IG-A4P3-01;TCGA-IG-A6QS-01;TCGA-JY-A93F-01;TCGA-L5-A4OM-01;TCGA-LN-A49P-01;TCGA-LN-A49R-01;TCGA-LN-A49W-01;TCGA-LN-A4A1-01;TCGA-LN-A4A2-01;TCGA-LN-A4A4-01;TCGA-LN-A7HW-01;TCGA-LN-A9FR-01;TCGA-S8-A6BW-01;TCGA-V5-A7RC-01;TCGA-VR-A8EW-01;TCGA-XP-A8T6-01;TCGA-XP-A8T8-01;TCGA-Z6-A9VB-01	no_validation_or_external_data_used
outer	15	3		RNA_rank_activity	TCGA_Hallmark_RNA_rank_activity_C01v1	z_score	outer_training_samples_only	outer_validation_samples	74	18	TCGA-IG-A3I8-01;TCGA-IG-A3QL-01;TCGA-IG-A3Y9-01;TCGA-IG-A3YA-01;TCGA-IG-A3YB-01;TCGA-IG-A4P3-01;TCGA-IG-A4QT-01;TCGA-IG-A50L-01;TCGA-IG-A51D-01;TCGA-IG-A5B8-01;TCGA-IG-A5S3-01;TCGA-IG-A625-01;TCGA-IG-A6QS-01;TCGA-IG-A8O2-01;TCGA-IG-A97H-01;TCGA-IG-A97I-01;TCGA-JY-A6FA-01;TCGA-JY-A6FE-01;TCGA-JY-A6FG-01;TCGA-JY-A93F-01;TCGA-KH-A6WC-01;TCGA-L5-A43H-01;TCGA-L5-A4OM-01;TCGA-L5-A88Z-01;TCGA-L5-A8NK-01…	TCGA-JY-A6FD-01;TCGA-L5-A88S-01;TCGA-L5-A88W-01;TCGA-L7-A56G-01;TCGA-LN-A49M-01;TCGA-LN-A49N-01;TCGA-LN-A49Y-01;TCGA-LN-A4A9-01;TCGA-LN-A4MQ-01;TCGA-LN-A4MR-01;TCGA-LN-A7HZ-01;TCGA-LN-A8HZ-01;TCGA-LN-A8I0-01;TCGA-Q9-A6FU-01;TCGA-VR-A8ER-01;TCGA-VR-A8EZ-01;TCGA-Z6-A8JD-01;TCGA-Z6-A8JE-01	no_validation_or_external_data_used
outer	15	3		CNV_abs_burden	TCGA_Hallmark_CNV_abs_burden_C01v1	z_score	outer_training_samples_only	outer_validation_samples	74	18	TCGA-IG-A3I8-01;TCGA-IG-A3QL-01;TCGA-IG-A3Y9-01;TCGA-IG-A3YA-01;TCGA-IG-A3YB-01;TCGA-IG-A4P3-01;TCGA-IG-A4QT-01;TCGA-IG-A50L-01;TCGA-IG-A51D-01;TCGA-IG-A5B8-01;TCGA-IG-A5S3-01;TCGA-IG-A625-01;TCGA-IG-A6QS-01;TCGA-IG-A8O2-01;TCGA-IG-A97H-01;TCGA-IG-A97I-01;TCGA-JY-A6FA-01;TCGA-JY-A6FE-01;TCGA-JY-A6FG-01;TCGA-JY-A93F-01;TCGA-KH-A6WC-01;TCGA-L5-A43H-01;TCGA-L5-A4OM-01;TCGA-L5-A88Z-01;TCGA-L5-A8NK-01…	TCGA-JY-A6FD-01;TCGA-L5-A88S-01;TCGA-L5-A88W-01;TCGA-L7-A56G-01;TCGA-LN-A49M-01;TCGA-LN-A49N-01;TCGA-LN-A49Y-01;TCGA-LN-A4A9-01;TCGA-LN-A4MQ-01;TCGA-LN-A4MR-01;TCGA-LN-A7HZ-01;TCGA-LN-A8HZ-01;TCGA-LN-A8I0-01;TCGA-Q9-A6FU-01;TCGA-VR-A8ER-01;TCGA-VR-A8EZ-01;TCGA-Z6-A8JD-01;TCGA-Z6-A8JE-01	no_validation_or_external_data_used
outer	15	3		METH_promoter_state	TCGA_Hallmark_METH_promoter_state_C01v1	z_score	outer_training_samples_only	outer_validation_samples	74	18	TCGA-IG-A3I8-01;TCGA-IG-A3QL-01;TCGA-IG-A3Y9-01;TCGA-IG-A3YA-01;TCGA-IG-A3YB-01;TCGA-IG-A4P3-01;TCGA-IG-A4QT-01;TCGA-IG-A50L-01;TCGA-IG-A51D-01;TCGA-IG-A5B8-01;TCGA-IG-A5S3-01;TCGA-IG-A625-01;TCGA-IG-A6QS-01;TCGA-IG-A8O2-01;TCGA-IG-A97H-01;TCGA-IG-A97I-01;TCGA-JY-A6FA-01;TCGA-JY-A6FE-01;TCGA-JY-A6FG-01;TCGA-JY-A93F-01;TCGA-KH-A6WC-01;TCGA-L5-A43H-01;TCGA-L5-A4OM-01;TCGA-L5-A88Z-01;TCGA-L5-A8NK-01…	TCGA-JY-A6FD-01;TCGA-L5-A88S-01;TCGA-L5-A88W-01;TCGA-L7-A56G-01;TCGA-LN-A49M-01;TCGA-LN-A49N-01;TCGA-LN-A49Y-01;TCGA-LN-A4A9-01;TCGA-LN-A4MQ-01;TCGA-LN-A4MR-01;TCGA-LN-A7HZ-01;TCGA-LN-A8HZ-01;TCGA-LN-A8I0-01;TCGA-Q9-A6FU-01;TCGA-VR-A8ER-01;TCGA-VR-A8EZ-01;TCGA-Z6-A8JD-01;TCGA-Z6-A8JE-01	no_validation_or_external_data_used
outer	15	4		RNA_rank_activity	TCGA_Hallmark_RNA_rank_activity_C01v1	z_score	outer_training_samples_only	outer_validation_samples	74	18	TCGA-IG-A3YA-01;TCGA-IG-A4P3-01;TCGA-IG-A50L-01;TCGA-IG-A51D-01;TCGA-IG-A5B8-01;TCGA-IG-A5S3-01;TCGA-IG-A625-01;TCGA-IG-A6QS-01;TCGA-IG-A8O2-01;TCGA-IG-A97I-01;TCGA-JY-A6FA-01;TCGA-JY-A6FD-01;TCGA-JY-A6FE-01;TCGA-JY-A6FG-01;TCGA-JY-A93F-01;TCGA-KH-A6WC-01;TCGA-L5-A4OM-01;TCGA-L5-A88S-01;TCGA-L5-A88W-01;TCGA-L5-A88Z-01;TCGA-L5-A8NK-01;TCGA-L5-A8NQ-01;TCGA-L7-A56G-01;TCGA-LN-A49K-01;TCGA-LN-A49L-01…	TCGA-IG-A3I8-01;TCGA-IG-A3QL-01;TCGA-IG-A3Y9-01;TCGA-IG-A3YB-01;TCGA-IG-A4QT-01;TCGA-IG-A97H-01;TCGA-L5-A43H-01;TCGA-LN-A49U-01;TCGA-LN-A5U5-01;TCGA-LN-A5U6-01;TCGA-LN-A7HV-01;TCGA-LN-A9FP-01;TCGA-LN-A9FQ-01;TCGA-V5-AASV-01;TCGA-VR-A8EP-01;TCGA-VR-A8EX-01;TCGA-VR-AA7D-01;TCGA-Z6-AAPN-01	no_validation_or_external_data_used
outer	15	4		CNV_abs_burden	TCGA_Hallmark_CNV_abs_burden_C01v1	z_score	outer_training_samples_only	outer_validation_samples	74	18	TCGA-IG-A3YA-01;TCGA-IG-A4P3-01;TCGA-IG-A50L-01;TCGA-IG-A51D-01;TCGA-IG-A5B8-01;TCGA-IG-A5S3-01;TCGA-IG-A625-01;TCGA-IG-A6QS-01;TCGA-IG-A8O2-01;TCGA-IG-A97I-01;TCGA-JY-A6FA-01;TCGA-JY-A6FD-01;TCGA-JY-A6FE-01;TCGA-JY-A6FG-01;TCGA-JY-A93F-01;TCGA-KH-A6WC-01;TCGA-L5-A4OM-01;TCGA-L5-A88S-01;TCGA-L5-A88W-01;TCGA-L5-A88Z-01;TCGA-L5-A8NK-01;TCGA-L5-A8NQ-01;TCGA-L7-A56G-01;TCGA-LN-A49K-01;TCGA-LN-A49L-01…	TCGA-IG-A3I8-01;TCGA-IG-A3QL-01;TCGA-IG-A3Y9-01;TCGA-IG-A3YB-01;TCGA-IG-A4QT-01;TCGA-IG-A97H-01;TCGA-L5-A43H-01;TCGA-LN-A49U-01;TCGA-LN-A5U5-01;TCGA-LN-A5U6-01;TCGA-LN-A7HV-01;TCGA-LN-A9FP-01;TCGA-LN-A9FQ-01;TCGA-V5-AASV-01;TCGA-VR-A8EP-01;TCGA-VR-A8EX-01;TCGA-VR-AA7D-01;TCGA-Z6-AAPN-01	no_validation_or_external_data_used
outer	15	4		METH_promoter_state	TCGA_Hallmark_METH_promoter_state_C01v1	z_score	outer_training_samples_only	outer_validation_samples	74	18	TCGA-IG-A3YA-01;TCGA-IG-A4P3-01;TCGA-IG-A50L-01;TCGA-IG-A51D-01;TCGA-IG-A5B8-01;TCGA-IG-A5S3-01;TCGA-IG-A625-01;TCGA-IG-A6QS-01;TCGA-IG-A8O2-01;TCGA-IG-A97I-01;TCGA-JY-A6FA-01;TCGA-JY-A6FD-01;TCGA-JY-A6FE-01;TCGA-JY-A6FG-01;TCGA-JY-A93F-01;TCGA-KH-A6WC-01;TCGA-L5-A4OM-01;TCGA-L5-A88S-01;TCGA-L5-A88W-01;TCGA-L5-A88Z-01;TCGA-L5-A8NK-01;TCGA-L5-A8NQ-01;TCGA-L7-A56G-01;TCGA-LN-A49K-01;TCGA-LN-A49L-01…	TCGA-IG-A3I8-01;TCGA-IG-A3QL-01;TCGA-IG-A3Y9-01;TCGA-IG-A3YB-01;TCGA-IG-A4QT-01;TCGA-IG-A97H-01;TCGA-L5-A43H-01;TCGA-LN-A49U-01;TCGA-LN-A5U5-01;TCGA-LN-A5U6-01;TCGA-LN-A7HV-01;TCGA-LN-A9FP-01;TCGA-LN-A9FQ-01;TCGA-V5-AASV-01;TCGA-VR-A8EP-01;TCGA-VR-A8EX-01;TCGA-VR-AA7D-01;TCGA-Z6-AAPN-01	no_validation_or_external_data_used
outer	15	5		RNA_rank_activity	TCGA_Hallmark_RNA_rank_activity_C01v1	z_score	outer_training_samples_only	outer_validation_samples	74	18	TCGA-IG-A3I8-01;TCGA-IG-A3QL-01;TCGA-IG-A3Y9-01;TCGA-IG-A3YA-01;TCGA-IG-A3YB-01;TCGA-IG-A4P3-01;TCGA-IG-A4QT-01;TCGA-IG-A50L-01;TCGA-IG-A5B8-01;TCGA-IG-A6QS-01;TCGA-IG-A97H-01;TCGA-JY-A6FA-01;TCGA-JY-A6FD-01;TCGA-JY-A93F-01;TCGA-L5-A43H-01;TCGA-L5-A4OM-01;TCGA-L5-A88S-01;TCGA-L5-A88W-01;TCGA-L5-A88Z-01;TCGA-L5-A8NK-01;TCGA-L5-A8NQ-01;TCGA-L7-A56G-01;TCGA-LN-A49K-01;TCGA-LN-A49M-01;TCGA-LN-A49N-01…	TCGA-IG-A51D-01;TCGA-IG-A5S3-01;TCGA-IG-A625-01;TCGA-IG-A8O2-01;TCGA-IG-A97I-01;TCGA-JY-A6FE-01;TCGA-JY-A6FG-01;TCGA-KH-A6WC-01;TCGA-LN-A49L-01;TCGA-LN-A49O-01;TCGA-LN-A49V-01;TCGA-LN-A4A3-01;TCGA-LN-A7HY-01;TCGA-LN-A9FO-01;TCGA-VR-A8EO-01;TCGA-VR-A8EU-01;TCGA-VR-A8Q7-01;TCGA-VR-AA4G-01	no_validation_or_external_data_used
outer	15	5		CNV_abs_burden	TCGA_Hallmark_CNV_abs_burden_C01v1	z_score	outer_training_samples_only	outer_validation_samples	74	18	TCGA-IG-A3I8-01;TCGA-IG-A3QL-01;TCGA-IG-A3Y9-01;TCGA-IG-A3YA-01;TCGA-IG-A3YB-01;TCGA-IG-A4P3-01;TCGA-IG-A4QT-01;TCGA-IG-A50L-01;TCGA-IG-A5B8-01;TCGA-IG-A6QS-01;TCGA-IG-A97H-01;TCGA-JY-A6FA-01;TCGA-JY-A6FD-01;TCGA-JY-A93F-01;TCGA-L5-A43H-01;TCGA-L5-A4OM-01;TCGA-L5-A88S-01;TCGA-L5-A88W-01;TCGA-L5-A88Z-01;TCGA-L5-A8NK-01;TCGA-L5-A8NQ-01;TCGA-L7-A56G-01;TCGA-LN-A49K-01;TCGA-LN-A49M-01;TCGA-LN-A49N-01…	TCGA-IG-A51D-01;TCGA-IG-A5S3-01;TCGA-IG-A625-01;TCGA-IG-A8O2-01;TCGA-IG-A97I-01;TCGA-JY-A6FE-01;TCGA-JY-A6FG-01;TCGA-KH-A6WC-01;TCGA-LN-A49L-01;TCGA-LN-A49O-01;TCGA-LN-A49V-01;TCGA-LN-A4A3-01;TCGA-LN-A7HY-01;TCGA-LN-A9FO-01;TCGA-VR-A8EO-01;TCGA-VR-A8EU-01;TCGA-VR-A8Q7-01;TCGA-VR-AA4G-01	no_validation_or_external_data_used
outer	15	5		METH_promoter_state	TCGA_Hallmark_METH_promoter_state_C01v1	z_score	outer_training_samples_only	outer_validation_samples	74	18	TCGA-IG-A3I8-01;TCGA-IG-A3QL-01;TCGA-IG-A3Y9-01;TCGA-IG-A3YA-01;TCGA-IG-A3YB-01;TCGA-IG-A4P3-01;TCGA-IG-A4QT-01;TCGA-IG-A50L-01;TCGA-IG-A5B8-01;TCGA-IG-A6QS-01;TCGA-IG-A97H-01;TCGA-JY-A6FA-01;TCGA-JY-A6FD-01;TCGA-JY-A93F-01;TCGA-L5-A43H-01;TCGA-L5-A4OM-01;TCGA-L5-A88S-01;TCGA-L5-A88W-01;TCGA-L5-A88Z-01;TCGA-L5-A8NK-01;TCGA-L5-A8NQ-01;TCGA-L7-A56G-01;TCGA-LN-A49K-01;TCGA-LN-A49M-01;TCGA-LN-A49N-01…	TCGA-IG-A51D-01;TCGA-IG-A5S3-01;TCGA-IG-A625-01;TCGA-IG-A8O2-01;TCGA-IG-A97I-01;TCGA-JY-A6FE-01;TCGA-JY-A6FG-01;TCGA-KH-A6WC-01;TCGA-LN-A49L-01;TCGA-LN-A49O-01;TCGA-LN-A49V-01;TCGA-LN-A4A3-01;TCGA-LN-A7HY-01;TCGA-LN-A9FO-01;TCGA-VR-A8EO-01;TCGA-VR-A8EU-01;TCGA-VR-A8Q7-01;TCGA-VR-AA4G-01	no_validation_or_external_data_used
outer	16	1		RNA_rank_activity	TCGA_Hallmark_RNA_rank_activity_C01v1	z_score	outer_training_samples_only	outer_validation_samples	72	20	TCGA-IG-A3I8-01;TCGA-IG-A3Y9-01;TCGA-IG-A3YA-01;TCGA-IG-A3YB-01;TCGA-IG-A4P3-01;TCGA-IG-A50L-01;TCGA-IG-A51D-01;TCGA-IG-A5B8-01;TCGA-IG-A5S3-01;TCGA-IG-A625-01;TCGA-IG-A6QS-01;TCGA-IG-A8O2-01;TCGA-IG-A97H-01;TCGA-IG-A97I-01;TCGA-JY-A6FA-01;TCGA-JY-A6FD-01;TCGA-JY-A6FE-01;TCGA-JY-A6FG-01;TCGA-JY-A93F-01;TCGA-KH-A6WC-01;TCGA-L5-A43H-01;TCGA-L5-A4OM-01;TCGA-L5-A88Z-01;TCGA-L5-A8NK-01;TCGA-L5-A8NQ-01…	TCGA-IG-A3QL-01;TCGA-IG-A4QT-01;TCGA-L5-A88S-01;TCGA-L5-A88W-01;TCGA-L7-A56G-01;TCGA-LN-A49Y-01;TCGA-LN-A4A1-01;TCGA-LN-A4A4-01;TCGA-LN-A4A6-01;TCGA-LN-A4A9-01;TCGA-LN-A4MQ-01;TCGA-LN-A5U6-01;TCGA-LN-A8I0-01;TCGA-LN-A9FQ-01;TCGA-Q9-A6FU-01;TCGA-VR-A8EP-01;TCGA-VR-A8EU-01;TCGA-VR-A8EZ-01;TCGA-VR-A8Q7-01;TCGA-Z6-A8JE-01	no_validation_or_external_data_used
outer	16	1		CNV_abs_burden	TCGA_Hallmark_CNV_abs_burden_C01v1	z_score	outer_training_samples_only	outer_validation_samples	72	20	TCGA-IG-A3I8-01;TCGA-IG-A3Y9-01;TCGA-IG-A3YA-01;TCGA-IG-A3YB-01;TCGA-IG-A4P3-01;TCGA-IG-A50L-01;TCGA-IG-A51D-01;TCGA-IG-A5B8-01;TCGA-IG-A5S3-01;TCGA-IG-A625-01;TCGA-IG-A6QS-01;TCGA-IG-A8O2-01;TCGA-IG-A97H-01;TCGA-IG-A97I-01;TCGA-JY-A6FA-01;TCGA-JY-A6FD-01;TCGA-JY-A6FE-01;TCGA-JY-A6FG-01;TCGA-JY-A93F-01;TCGA-KH-A6WC-01;TCGA-L5-A43H-01;TCGA-L5-A4OM-01;TCGA-L5-A88Z-01;TCGA-L5-A8NK-01;TCGA-L5-A8NQ-01…	TCGA-IG-A3QL-01;TCGA-IG-A4QT-01;TCGA-L5-A88S-01;TCGA-L5-A88W-01;TCGA-L7-A56G-01;TCGA-LN-A49Y-01;TCGA-LN-A4A1-01;TCGA-LN-A4A4-01;TCGA-LN-A4A6-01;TCGA-LN-A4A9-01;TCGA-LN-A4MQ-01;TCGA-LN-A5U6-01;TCGA-LN-A8I0-01;TCGA-LN-A9FQ-01;TCGA-Q9-A6FU-01;TCGA-VR-A8EP-01;TCGA-VR-A8EU-01;TCGA-VR-A8EZ-01;TCGA-VR-A8Q7-01;TCGA-Z6-A8JE-01	no_validation_or_external_data_used
outer	16	1		METH_promoter_state	TCGA_Hallmark_METH_promoter_state_C01v1	z_score	outer_training_samples_only	outer_validation_samples	72	20	TCGA-IG-A3I8-01;TCGA-IG-A3Y9-01;TCGA-IG-A3YA-01;TCGA-IG-A3YB-01;TCGA-IG-A4P3-01;TCGA-IG-A50L-01;TCGA-IG-A51D-01;TCGA-IG-A5B8-01;TCGA-IG-A5S3-01;TCGA-IG-A625-01;TCGA-IG-A6QS-01;TCGA-IG-A8O2-01;TCGA-IG-A97H-01;TCGA-IG-A97I-01;TCGA-JY-A6FA-01;TCGA-JY-A6FD-01;TCGA-JY-A6FE-01;TCGA-JY-A6FG-01;TCGA-JY-A93F-01;TCGA-KH-A6WC-01;TCGA-L5-A43H-01;TCGA-L5-A4OM-01;TCGA-L5-A88Z-01;TCGA-L5-A8NK-01;TCGA-L5-A8NQ-01…	TCGA-IG-A3QL-01;TCGA-IG-A4QT-01;TCGA-L5-A88S-01;TCGA-L5-A88W-01;TCGA-L7-A56G-01;TCGA-LN-A49Y-01;TCGA-LN-A4A1-01;TCGA-LN-A4A4-01;TCGA-LN-A4A6-01;TCGA-LN-A4A9-01;TCGA-LN-A4MQ-01;TCGA-LN-A5U6-01;TCGA-LN-A8I0-01;TCGA-LN-A9FQ-01;TCGA-Q9-A6FU-01;TCGA-VR-A8EP-01;TCGA-VR-A8EU-01;TCGA-VR-A8EZ-01;TCGA-VR-A8Q7-01;TCGA-Z6-A8JE-01	no_validation_or_external_data_used
outer	16	2		RNA_rank_activity	TCGA_Hallmark_RNA_rank_activity_C01v1	z_score	outer_training_samples_only	outer_validation_samples	74	18	TCGA-IG-A3QL-01;TCGA-IG-A3Y9-01;TCGA-IG-A3YA-01;TCGA-IG-A3YB-01;TCGA-IG-A4QT-01;TCGA-IG-A5S3-01;TCGA-IG-A625-01;TCGA-IG-A6QS-01;TCGA-IG-A97H-01;TCGA-IG-A97I-01;TCGA-JY-A6FA-01;TCGA-JY-A6FE-01;TCGA-JY-A93F-01;TCGA-L5-A43H-01;TCGA-L5-A4OM-01;TCGA-L5-A88S-01;TCGA-L5-A88W-01;TCGA-L5-A8NK-01;TCGA-L5-A8NQ-01;TCGA-L7-A56G-01;TCGA-LN-A49K-01;TCGA-LN-A49L-01;TCGA-LN-A49M-01;TCGA-LN-A49N-01;TCGA-LN-A49O-01…	TCGA-IG-A3I8-01;TCGA-IG-A4P3-01;TCGA-IG-A50L-01;TCGA-IG-A51D-01;TCGA-IG-A5B8-01;TCGA-IG-A8O2-01;TCGA-JY-A6FD-01;TCGA-JY-A6FG-01;TCGA-KH-A6WC-01;TCGA-L5-A88Z-01;TCGA-LN-A49S-01;TCGA-LN-A49U-01;TCGA-LN-A7HV-01;TCGA-LN-A7HX-01;TCGA-LN-A9FO-01;TCGA-LN-A9FP-01;TCGA-VR-A8ET-01;TCGA-VR-AA7I-01	no_validation_or_external_data_used
outer	16	2		CNV_abs_burden	TCGA_Hallmark_CNV_abs_burden_C01v1	z_score	outer_training_samples_only	outer_validation_samples	74	18	TCGA-IG-A3QL-01;TCGA-IG-A3Y9-01;TCGA-IG-A3YA-01;TCGA-IG-A3YB-01;TCGA-IG-A4QT-01;TCGA-IG-A5S3-01;TCGA-IG-A625-01;TCGA-IG-A6QS-01;TCGA-IG-A97H-01;TCGA-IG-A97I-01;TCGA-JY-A6FA-01;TCGA-JY-A6FE-01;TCGA-JY-A93F-01;TCGA-L5-A43H-01;TCGA-L5-A4OM-01;TCGA-L5-A88S-01;TCGA-L5-A88W-01;TCGA-L5-A8NK-01;TCGA-L5-A8NQ-01;TCGA-L7-A56G-01;TCGA-LN-A49K-01;TCGA-LN-A49L-01;TCGA-LN-A49M-01;TCGA-LN-A49N-01;TCGA-LN-A49O-01…	TCGA-IG-A3I8-01;TCGA-IG-A4P3-01;TCGA-IG-A50L-01;TCGA-IG-A51D-01;TCGA-IG-A5B8-01;TCGA-IG-A8O2-01;TCGA-JY-A6FD-01;TCGA-JY-A6FG-01;TCGA-KH-A6WC-01;TCGA-L5-A88Z-01;TCGA-LN-A49S-01;TCGA-LN-A49U-01;TCGA-LN-A7HV-01;TCGA-LN-A7HX-01;TCGA-LN-A9FO-01;TCGA-LN-A9FP-01;TCGA-VR-A8ET-01;TCGA-VR-AA7I-01	no_validation_or_external_data_used
outer	16	2		METH_promoter_state	TCGA_Hallmark_METH_promoter_state_C01v1	z_score	outer_training_samples_only	outer_validation_samples	74	18	TCGA-IG-A3QL-01;TCGA-IG-A3Y9-01;TCGA-IG-A3YA-01;TCGA-IG-A3YB-01;TCGA-IG-A4QT-01;TCGA-IG-A5S3-01;TCGA-IG-A625-01;TCGA-IG-A6QS-01;TCGA-IG-A97H-01;TCGA-IG-A97I-01;TCGA-JY-A6FA-01;TCGA-JY-A6FE-01;TCGA-JY-A93F-01;TCGA-L5-A43H-01;TCGA-L5-A4OM-01;TCGA-L5-A88S-01;TCGA-L5-A88W-01;TCGA-L5-A8NK-01;TCGA-L5-A8NQ-01;TCGA-L7-A56G-01;TCGA-LN-A49K-01;TCGA-LN-A49L-01;TCGA-LN-A49M-01;TCGA-LN-A49N-01;TCGA-LN-A49O-01…	TCGA-IG-A3I8-01;TCGA-IG-A4P3-01;TCGA-IG-A50L-01;TCGA-IG-A51D-01;TCGA-IG-A5B8-01;TCGA-IG-A8O2-01;TCGA-JY-A6FD-01;TCGA-JY-A6FG-01;TCGA-KH-A6WC-01;TCGA-L5-A88Z-01;TCGA-LN-A49S-01;TCGA-LN-A49U-01;TCGA-LN-A7HV-01;TCGA-LN-A7HX-01;TCGA-LN-A9FO-01;TCGA-LN-A9FP-01;TCGA-VR-A8ET-01;TCGA-VR-AA7I-01	no_validation_or_external_data_used
outer	16	3		RNA_rank_activity	TCGA_Hallmark_RNA_rank_activity_C01v1	z_score	outer_training_samples_only	outer_validation_samples	74	18	TCGA-IG-A3I8-01;TCGA-IG-A3QL-01;TCGA-IG-A3YA-01;TCGA-IG-A3YB-01;TCGA-IG-A4P3-01;TCGA-IG-A4QT-01;TCGA-IG-A50L-01;TCGA-IG-A51D-01;TCGA-IG-A5B8-01;TCGA-IG-A5S3-01;TCGA-IG-A625-01;TCGA-IG-A8O2-01;TCGA-IG-A97H-01;TCGA-JY-A6FA-01;TCGA-JY-A6FD-01;TCGA-JY-A6FE-01;TCGA-JY-A6FG-01;TCGA-JY-A93F-01;TCGA-KH-A6WC-01;TCGA-L5-A43H-01;TCGA-L5-A4OM-01;TCGA-L5-A88S-01;TCGA-L5-A88W-01;TCGA-L5-A88Z-01;TCGA-L7-A56G-01…	TCGA-IG-A3Y9-01;TCGA-IG-A6QS-01;TCGA-IG-A97I-01;TCGA-L5-A8NK-01;TCGA-L5-A8NQ-01;TCGA-LN-A49K-01;TCGA-LN-A49R-01;TCGA-LN-A49V-01;TCGA-LN-A49W-01;TCGA-LN-A7HW-01;TCGA-LN-A7HY-01;TCGA-S8-A6BW-01;TCGA-V5-A7RC-01;TCGA-VR-AA7B-01;TCGA-XP-A8T6-01;TCGA-XP-A8T8-01;TCGA-Z6-A8JD-01;TCGA-Z6-AAPN-01	no_validation_or_external_data_used
outer	16	3		CNV_abs_burden	TCGA_Hallmark_CNV_abs_burden_C01v1	z_score	outer_training_samples_only	outer_validation_samples	74	18	TCGA-IG-A3I8-01;TCGA-IG-A3QL-01;TCGA-IG-A3YA-01;TCGA-IG-A3YB-01;TCGA-IG-A4P3-01;TCGA-IG-A4QT-01;TCGA-IG-A50L-01;TCGA-IG-A51D-01;TCGA-IG-A5B8-01;TCGA-IG-A5S3-01;TCGA-IG-A625-01;TCGA-IG-A8O2-01;TCGA-IG-A97H-01;TCGA-JY-A6FA-01;TCGA-JY-A6FD-01;TCGA-JY-A6FE-01;TCGA-JY-A6FG-01;TCGA-JY-A93F-01;TCGA-KH-A6WC-01;TCGA-L5-A43H-01;TCGA-L5-A4OM-01;TCGA-L5-A88S-01;TCGA-L5-A88W-01;TCGA-L5-A88Z-01;TCGA-L7-A56G-01…	TCGA-IG-A3Y9-01;TCGA-IG-A6QS-01;TCGA-IG-A97I-01;TCGA-L5-A8NK-01;TCGA-L5-A8NQ-01;TCGA-LN-A49K-01;TCGA-LN-A49R-01;TCGA-LN-A49V-01;TCGA-LN-A49W-01;TCGA-LN-A7HW-01;TCGA-LN-A7HY-01;TCGA-S8-A6BW-01;TCGA-V5-A7RC-01;TCGA-VR-AA7B-01;TCGA-XP-A8T6-01;TCGA-XP-A8T8-01;TCGA-Z6-A8JD-01;TCGA-Z6-AAPN-01	no_validation_or_external_data_used
outer	16	3		METH_promoter_state	TCGA_Hallmark_METH_promoter_state_C01v1	z_score	outer_training_samples_only	outer_validation_samples	74	18	TCGA-IG-A3I8-01;TCGA-IG-A3QL-01;TCGA-IG-A3YA-01;TCGA-IG-A3YB-01;TCGA-IG-A4P3-01;TCGA-IG-A4QT-01;TCGA-IG-A50L-01;TCGA-IG-A51D-01;TCGA-IG-A5B8-01;TCGA-IG-A5S3-01;TCGA-IG-A625-01;TCGA-IG-A8O2-01;TCGA-IG-A97H-01;TCGA-JY-A6FA-01;TCGA-JY-A6FD-01;TCGA-JY-A6FE-01;TCGA-JY-A6FG-01;TCGA-JY-A93F-01;TCGA-KH-A6WC-01;TCGA-L5-A43H-01;TCGA-L5-A4OM-01;TCGA-L5-A88S-01;TCGA-L5-A88W-01;TCGA-L5-A88Z-01;TCGA-L7-A56G-01…	TCGA-IG-A3Y9-01;TCGA-IG-A6QS-01;TCGA-IG-A97I-01;TCGA-L5-A8NK-01;TCGA-L5-A8NQ-01;TCGA-LN-A49K-01;TCGA-LN-A49R-01;TCGA-LN-A49V-01;TCGA-LN-A49W-01;TCGA-LN-A7HW-01;TCGA-LN-A7HY-01;TCGA-S8-A6BW-01;TCGA-V5-A7RC-01;TCGA-VR-AA7B-01;TCGA-XP-A8T6-01;TCGA-XP-A8T8-01;TCGA-Z6-A8JD-01;TCGA-Z6-AAPN-01	no_validation_or_external_data_used
outer	16	4		RNA_rank_activity	TCGA_Hallmark_RNA_rank_activity_C01v1	z_score	outer_training_samples_only	outer_validation_samples	74	18	TCGA-IG-A3I8-01;TCGA-IG-A3QL-01;TCGA-IG-A3Y9-01;TCGA-IG-A3YA-01;TCGA-IG-A3YB-01;TCGA-IG-A4P3-01;TCGA-IG-A4QT-01;TCGA-IG-A50L-01;TCGA-IG-A51D-01;TCGA-IG-A5B8-01;TCGA-IG-A625-01;TCGA-IG-A6QS-01;TCGA-IG-A8O2-01;TCGA-IG-A97I-01;TCGA-JY-A6FA-01;TCGA-JY-A6FD-01;TCGA-JY-A6FG-01;TCGA-KH-A6WC-01;TCGA-L5-A88S-01;TCGA-L5-A88W-01;TCGA-L5-A88Z-01;TCGA-L5-A8NK-01;TCGA-L5-A8NQ-01;TCGA-L7-A56G-01;TCGA-LN-A49K-01…	TCGA-IG-A5S3-01;TCGA-IG-A97H-01;TCGA-JY-A6FE-01;TCGA-JY-A93F-01;TCGA-L5-A43H-01;TCGA-L5-A4OM-01;TCGA-LN-A49N-01;TCGA-LN-A49P-01;TCGA-LN-A4A2-01;TCGA-LN-A4A5-01;TCGA-LN-A4MR-01;TCGA-LN-A8HZ-01;TCGA-LN-A8I1-01;TCGA-VR-A8EO-01;TCGA-VR-A8ER-01;TCGA-VR-A8EY-01;TCGA-VR-AA4G-01;TCGA-VR-AA7D-01	no_validation_or_external_data_used
outer	16	4		CNV_abs_burden	TCGA_Hallmark_CNV_abs_burden_C01v1	z_score	outer_training_samples_only	outer_validation_samples	74	18	TCGA-IG-A3I8-01;TCGA-IG-A3QL-01;TCGA-IG-A3Y9-01;TCGA-IG-A3YA-01;TCGA-IG-A3YB-01;TCGA-IG-A4P3-01;TCGA-IG-A4QT-01;TCGA-IG-A50L-01;TCGA-IG-A51D-01;TCGA-IG-A5B8-01;TCGA-IG-A625-01;TCGA-IG-A6QS-01;TCGA-IG-A8O2-01;TCGA-IG-A97I-01;TCGA-JY-A6FA-01;TCGA-JY-A6FD-01;TCGA-JY-A6FG-01;TCGA-KH-A6WC-01;TCGA-L5-A88S-01;TCGA-L5-A88W-01;TCGA-L5-A88Z-01;TCGA-L5-A8NK-01;TCGA-L5-A8NQ-01;TCGA-L7-A56G-01;TCGA-LN-A49K-01…	TCGA-IG-A5S3-01;TCGA-IG-A97H-01;TCGA-JY-A6FE-01;TCGA-JY-A93F-01;TCGA-L5-A43H-01;TCGA-L5-A4OM-01;TCGA-LN-A49N-01;TCGA-LN-A49P-01;TCGA-LN-A4A2-01;TCGA-LN-A4A5-01;TCGA-LN-A4MR-01;TCGA-LN-A8HZ-01;TCGA-LN-A8I1-01;TCGA-VR-A8EO-01;TCGA-VR-A8ER-01;TCGA-VR-A8EY-01;TCGA-VR-AA4G-01;TCGA-VR-AA7D-01	no_validation_or_external_data_used
[truncated: 10,795 more rows]

## Sheet: S4_Model_Performance
Supplementary Data S4. Internal and external model performance outputs
C03_01_model_performance_summary.tsv
model_id	n_repeats	mean_oof_cindex	sd_oof_cindex	median_oof_cindex	q25_oof_cindex	q75_oof_cindex	min_oof_cindex	max_oof_cindex	mean_risk_score_sd
M0_null_baseline	20	0.5	0	0.5	0.5	0.5	0.5	0.5	0
M1_RNA_ridge	20	0.518335	0.041345	0.50821	0.49678	0.538474	0.456536	0.600773	1.545881
M2_RNA_CNV_ridge	20	0.570187	0.057492	0.574372	0.547489	0.608339	0.438184	0.659047	1.694953
M3_RNA_CNV_METH_ridge	20	0.556294	0.044987	0.557308	0.538474	0.579041	0.475209	0.650354	1.729163
C03_01_repeat_level_performance.tsv
repeat_id	model_id	n_samples	n_events	n_censored	oof_cindex	risk_score_sd
1	M0_null_baseline	92	31	61	0.5	0
1	M1_RNA_ridge	92	31	61	0.533161622665808	1.0245462030608
[truncated: 155 more rows]

## Sheet: S5_External_Diagnostics
Supplementary Data S5. External deployment diagnostics and distribution-shift outputs
[truncated: 160 more rows]

[truncated: 2 more sheets: S6_RNA_Sensitivity, Checklist_Manifest]
