# Supplementary material
Source: Research Square preprint supplement (doi:10.21203/rs.3.rs-9851307/v1)
Supplement: Supplementary file 1 [file 9842e708f25c82cd5b41db50.docx]

# Supplementary materials

The supplementary material is provided as one Excel workbook with seven clearly named sheets. It contains only the analysis materials needed to support the manuscript conclusions, without the redundant audit files from intermediate development steps.

## Supplementary materials index

| **Supplementary item** | **File / content** | **Format** | **Included sheet** |
| --- | --- | --- | --- |
| Supplementary Data S1 | Cohort and data-freeze manifests; sample and modality manifest | Excel workbook sheet | S1_Cohort_Freeze |
| Supplementary Data S2 | Pathway set details and pathway-level feature construction QC | Excel workbook sheet | S2_Pathway_QC |
| Supplementary Data S3 | Nested CV fold definitions, scaling plan, modeling specifications | Excel workbook sheet | S3_NestedCV_Modeling |
| Supplementary Data S4 | Internal and external model performance outputs | Excel workbook sheet | S4_Model_Performance |
| Supplementary Data S5 | External deployment diagnostics and distribution-shift outputs | Excel workbook sheet | S5_External_Diagnostics |
| Supplementary Data S6 | Alternative RNA pathway scoring sensitivity outputs | Excel workbook sheet | S6_RNA_Sensitivity |
| Supplementary Checklist | Manual submission placeholders and package manifest | Excel workbook sheet | Checklist_Manifest |

Suggested citation in manuscript: Additional cohort manifests, pathway construction QC, nested cross-validation settings, model performance outputs, external deployment diagnostics, RNA-scoring sensitivity analyses, and submission checklist are provided in Supplementary Data S1-S6 and Supplementary Checklist.
